# Supplementary material for: Quantitative estimates of preventable and treatable deaths from 36 cancers worldwide: a population-based study
Source: PubMed Central journal article supplement — Lancet Glob Health. 2023 Sep 26;11(11):e1700–12. doi: 10.1016/S2214-109X(23)00406-0 (PMC10581909; doi:10.1016/s2214-109x(23)00406-0), 2023-09-26
Supplement: mmc1.pdf [file mmc1.pdf]

# THE LANCET

## Global Health

### Supplementary appendix 1

This translation in German was submitted by the authors and we reproduce it as supplied. It has not been peer reviewed. *The Lancet's* editorial processes have only been applied to the original in English, which should serve as reference for this manuscript.

Diese Übersetzung in deutscher Sprache wurde von den Autoren eingereicht und wir reproduzieren sie wie vorgelegt. Die Übersetzung wurde nicht von Experten begutachtet. Die redaktionellen Prozesse von The Lancet wurden nur auf das Original in englischer Sprache angewendet, das als Referenz für dieses Manuskript dienen soll.

Supplement to: Frick C, Runggay H, Vignat J, et al. Quantitative estimates of preventable and treatable deaths from 36 cancers worldwide: a population-based study. *Lancet Glob Health* 2023; published online Sept 26. [https://doi.org/10.1016/S2214-109X\(23\)00406-0](https://doi.org/10.1016/S2214-109X(23)00406-0).

**Quantitative Schätzungen verhinderbarer und behandelbarer Todesfälle durch 36 Krebsarten weltweit:  
eine bevölkerungsbasierte Studie**

**Hintergrund:** Krebs ist weltweit eine der Hauptursachen für vorzeitige Sterblichkeit. Diese Studie quantifiziert anhand von Untersuchungen zu 185 Ländern durch Krebs verursachte Todesfälle, die im Alter von 30 bis 69 Jahren eintraten und teilt sie in zwei Gruppen ein: (I) die Todesfälle, die durch Primär- oder Sekundärprävention hätten verhindert werden können und (II), die durch kurative Behandlungsmethoden und Medizin hätten vermieden werden können.

**Methoden:** Die geschätzten Todesfälle nach Land, Krebsart, Geschlecht und Altersgruppe wurden von der GLOBOCAN 2020-Datenbank der Internationalen Agentur für Krebsforschung (IARC) erhoben. Die Gesamtzahlen als auch alters-standardisierte krebspezifische verlorene Lebensjahre (years of life lost - YLL) wurden für 36 Krebsarten berechnet.

**Ergebnisse:** Von der geschätzten weltweiten Krebsbelastung aller Altersgruppen von 265,6 Millionen YLL waren schätzungsweise 68,8% oder 182,8 Millionen YLL im Jahr 2020 auf vorzeitige Todesfälle durch Krebs zurückzuführen, wobei 124,3 Millionen (68,0%) durch Primär- oder Sekundärprävention vermeidbar gewesen und 58,5 Millionen (32,0%) behandelbar gewesen wären. Länder mit niedrigem, mittlerem oder hohem Niveau des Human Development Index (HDI) Wertes hatten einen größeren Anteil von Krebstodesfällen, die frühzeitig eintraten als Länder mit sehr hohem HDI (68,9%, 77,0% und 72,2% versus 57,7%). Lungenkrebs war die häufigste vermeidbare Krebstodesursache in Ländern mit mittlerem bis sehr hohem HDI (17,4% aller Krebserkrankungen bzw. 29,7 Millionen von 171,3 Millionen YLL), während Gebärmutterhalskrebs in Ländern mit niedrigem HDI an erster Stelle stand (26,3% aller vermeidbaren Krebserkrankungen oder 1,83 Mio. von 6,93 Millionen YLL). Darm- und Brustkrebs waren die wichtigsten behandelbaren Krebsarten in allen vier HDI-Stufen (25,5% der Gesamtheit aller behandelbaren Krebsarten oder 14,9 Millionen von 58,5 Millionen YLL).

**Interpretation:** Zusätzlich zur Implementation von Programmen zur Frühdiagnose und Früherkennung in Verbindung mit rechtzeitiger und umfassender Behandlung sind größere Investitionen zur Reduzierung von Risikofaktoren als auch zur Anhebung der Impfquote erforderlich, um Ungleichheiten bei vorzeitiger und vermeidbarer Krebserkrankung anzugehen.

**Finanzierung:** CF wurde durch das Erasmus-Mundus-Austauschprogramm und IARC finanziert.
