# Supplementary material for: Quantitative estimates of preventable and treatable deaths from 36 cancers worldwide: a population-based study
Source: PubMed Central journal article supplement — Lancet Glob Health. 2023 Sep 26;11(11):e1700–12. doi: 10.1016/S2214-109X(23)00406-0 (PMC10581909; doi:10.1016/s2214-109x(23)00406-0), 2023-09-26
Supplement: mmc2.pdf [file mmc2.pdf]

# THE LANCET

## Global Health

### Supplementary appendix 2

This translation in French was submitted by the authors and we reproduce it as supplied. It has not been peer reviewed. *The Lancet's* editorial processes have only been applied to the original in English, which should serve as reference for this manuscript.

Cette traduction en français a été proposée par les auteurs et nous l'avons reproduite telle quelle. Elle n'a pas été examinée par des pairs. Les processus éditoriaux du *Lancet* n'ont été appliqués qu'à l'original en anglais et c'est cette version qui doit servir de référence pour ce manuscrit.

Supplement to: Frick C, Runggay H, Vignat J, et al. Quantitative estimates of preventable and treatable deaths from 36 cancers worldwide: a population-based study. *Lancet Glob Health* 2023; published online Sept 26. [https://doi.org/10.1016/S2214-109X\(23\)00406-0](https://doi.org/10.1016/S2214-109X(23)00406-0).

## **Estimations quantitatives des décès évitables grâce à la prévention et aux traitements de 36 cancers dans le monde : une étude au niveau population**

**Contexte:** Le cancer est l'une des principales causes de mortalité prématurée à l'échelle mondiale. Parmi les décès prématurés entre les âges de 30 et 69 ans, cette étude distingue les décès évitables (grâce à des mesures de préventions primaires ou secondaires) des décès traitables (grâce à des traitements curatifs) dans 185 pays à travers le monde.

**Méthodes:** Les estimations du nombre de décès liés au cancer par pays, type de cancer, sexe et groupe d'âge ont été extraites de la base de données GLOBOCAN 2020 du CIRC. Les nombres bruts d'années de vie perdues (AVP) et ajustés selon l'âge ont été calculés pour 36 types de cancer.

**Résultats:** Le nombre total d'AVP lié au cancer tous âges confondus a été estimé à 265·6 millions dans le monde en 2020, et environ 68·8%, soit 182·8 millions d'AVP, étaient dues à des décès prématurés de cancer. Parmi eux, 68·0% étaient évitables grâce à la prévention et 32·0% étaient traitables (124·3 millions et 58·5 millions, respectivement). Les pays ayant des niveaux d'indice de développement humain (IDH) faibles, moyens ou élevés présentaient des proportions plus élevées d'AVP à des âges prématurés que les pays à IDH très élevé (68·9%, 77·0% et 72·2% contre 57·7%, respectivement). Le cancer du poumon était le cancer principal d'AVP prématurées évitables grâce à la prévention dans les pays à IDH moyen à très élevé (17·4% de tous les cancers, soit 29·7 millions sur les 171·3 millions d'AVP), tandis que le cancer du col de l'utérus était le cancer principal dans les pays à IDH faible (26·3% de tous les cancers, soit 1·83 million sur les 6·93 millions d'AVP). Les cancers du côlon rectum et du sein étaient les principaux cancers traitables dans les pays de chaque niveau d'IDH (25·5% de tous les cancers traitables, soit 14·9 millions sur les 58·5 millions d'AVP).

**Interprétation:** Parallèlement à des programmes adaptés de diagnostic et de dépistage couplés à des traitements complets et en temps opportun, des investissements plus importants dans la réduction des facteurs de risque et la vaccination sont nécessaires pour lutter contre les inégalités liées aux décès prématurés de cancer.

**Financement:** CF a été financée en partie par le programme d'échange Erasmus Mundus et par le Centre International de Recherche sur le Cancer.
