# Supplementary material for: Quantitative estimates of preventable and treatable deaths from 36 cancers worldwide: a population-based study
Source: PubMed Central journal article supplement — Lancet Glob Health. 2023 Sep 26;11(11):e1700–12. doi: 10.1016/S2214-109X(23)00406-0 (PMC10581909; doi:10.1016/s2214-109x(23)00406-0), 2023-09-26
Supplement: mmc3.pdf [file mmc3.pdf]

# THE LANCET

## Global Health

### Supplementary appendix 3

This translation in Spanish was submitted by the authors and we reproduce it as supplied. It has not been peer reviewed. *The Lancet's* editorial processes have only been applied to the original in English, which should serve as reference for this manuscript.

Los autores nos proporcionaron esta traducción al español y la reproducimos tal como nos fue entregada. No la hemos revisado. Los procesos editoriales de *The Lancet* se han aplicado únicamente al original en inglés, que debe servir de referencia para este manuscrito.

Supplement to: Frick C, Runggay H, Vignat J, et al. Quantitative estimates of preventable and treatable deaths from 36 cancers worldwide: a population-based study. *Lancet Glob Health* 2023; published online Sept 26. [https://doi.org/10.1016/S2214-109X\(23\)00406-0](https://doi.org/10.1016/S2214-109X(23)00406-0).

**Estimaciones cuantitativas de las muertes evitables y tratables por 36 tipos de cáncer en todo el mundo:**  
**un estudio basado en la población**

**Introducción:** El cáncer es una de las principales causas de mortalidad prematura en todo el mundo. En este estudio se analizan las muertes prematuras por cáncer entre los 30 y los 69 años de edad y se diferencian en muertes evitables (evitables mediante prevención primaria o secundaria) o tratables (evitables mediante tratamiento curativo) en 185 países de todo el mundo.

**Métodos:** Las muertes por cáncer estimadas por país, tipo de cáncer, sexo y grupo de edad se extrajeron de la Base de datos GLOBOCAN 2020 de IARC. Los años de vida perdidos (AVP) específicos del cáncer crudos y ajustados por edad fueron calculado para 36 tipos de cáncer.

**Resultados:** De los 265·6 millones de AVP por cáncer para todas las edades, se estima que el 68·8% o 182·8 millones se debieron a muertes prematuras por cáncer a nivel mundial en 2020, con un 68·0% prevenible y un 32·0% tratable (124·3 millones y 58·5 millones, respectivamente). Los países con niveles bajos, medios y altos de índice de desarrollo humano (IDH) tuvieron mayores proporciones de AVP en edades prematuras comparados con aquellos países con IDH muy alto (68·9%, 77·0% y 72·2% frente a 57·7%, respectivamente). El cáncer de pulmón fue la principal causa de AVP prematuros prevenibles en países con IDH medio a muy alto (17·4% de todos los cánceres, o 29·7 millones de un total de 171·3 millones de AVP), mientras que el cáncer de cuello uterino fue la principal en países con IDH bajo (26·3% de todos los cánceres, o 1·83 millones de un total de 6·93 millones AVP). El cáncer colorrectal y el de mama fueron los principales cánceres tratables en los cuatro niveles de IDH (en conjunto constituyeron el 25·5% de todos los cánceres tratables, o 14·9 millones de un total de 58·5 millones de AVP).

**Interpretación:** Junto con programas personalizados de diagnóstico temprano y screening vinculados a tratamiento precoz y adecuado, se necesitan mayores inversiones en reducción de factores de riesgo y vacunación para abordar las desigualdades prematuras del cáncer.

**Financiación:** CF fue financiada parcialmente por el Programa de Intercambio Erasmus Mundus y la Agencia Internacional para la Investigación del Cáncer.
