# Supplementary material for: Quantitative estimates of preventable and treatable deaths from 36 cancers worldwide: a population-based study
Source: PubMed Central journal article supplement — Lancet Glob Health. 2023 Sep 26;11(11):e1700–12. doi: 10.1016/S2214-109X(23)00406-0 (PMC10581909; doi:10.1016/s2214-109x(23)00406-0), 2023-09-26
Supplement: mmc4.pdf [file mmc4.pdf]

# THE LANCET

## Global Health

### Supplementary appendix 5

This appendix formed part of the original submission and has been peer reviewed. We post it as supplied by the authors.

Supplement to: Frick C, Runggay H, Vignat J, et al. Quantitative estimates of preventable and treatable deaths from 36 cancers worldwide: a population-based study. *Lancet Glob Health* 2023; published online Sept 26. [https://doi.org/10.1016/S2214-109X\(23\)00406-0](https://doi.org/10.1016/S2214-109X(23)00406-0).

定量估算全球 36 种癌症可预防和可治疗死亡人数：一项基于人口的研究

摘要

背景：癌症是导致全球性过早死亡的主要原因。本研究将全球185个国家年龄在 30-69 岁之间的人群过早死亡分为可预防（可通过一级或二级预防避免）或可治疗（可通过治疗避免）的死亡。

方法：本研究基于国际癌症研究机构的 GLOBOCAN 2020 数据库按国家、癌症类别、性别和年龄组分类所估算的癌症死亡人数。同时计算了 36 种癌症的粗略和年龄标准化的癌症相关的生命损失年数 (YLL)。

结果：我们估算在2020年，全球全年年龄段癌症负担共计 2.66 亿生命损失年，其中估计有1.83 亿生命损失年（68·8%）是由于过早死亡造成的：1.24亿（68·0%）可预防，0.585亿（32·0%）可治疗。人类发展指数（HDI）处于低、中或高水平的国家，由于过早罹患癌症产生的生命损失年（YLL）的比例均高于人类发展极高水平的国家（分别为 68·9%、77·0% 和 72·2% vs. 57·7%）。

在人类发展指数从中等至极高水平的国家中，肺癌是导致可预防的过早死亡的主要疾病（占所有癌症的 17·4%，即占 1.71 亿生命损失年总数中的两千九百七十万）。而宫颈癌则在低人类发展水平的国家居首位（占所有癌症的 26·3%，即占六百九十三万生命损失年总数的一百八十三万）。结直肠癌和乳腺癌在所有国家中均为最主要的可治疗的癌症（占所有可治疗癌症的 25·5%，即占五千八百五十万生命损失年总数中的一千四百九十万）。

结论：除了开展有针对性的早期诊断和筛查计划并与及时、全面的治疗相衔接之外，还需要在降低风险因素以及疫苗接种方面加大投资力度，以解决癌症导致过早死亡的不平等问题。
