# Supplementary material for: Quantitative estimates of preventable and treatable deaths from 36 cancers worldwide: a population-based study
Source: PubMed Central journal article supplement — Lancet Glob Health. 2023 Sep 26;11(11):e1700–12. doi: 10.1016/S2214-109X(23)00406-0 (PMC10581909; doi:10.1016/s2214-109x(23)00406-0), 2023-09-26
Supplement: mmc5.pdf [file mmc5.pdf]

# THE LANCET

## Global Health

### Supplementary appendix 5

This appendix formed part of the original submission and has been peer reviewed. We post it as supplied by the authors.

Supplement to: Frick C, Runggay H, Vignat J, et al. Quantitative estimates of preventable and treatable deaths from 36 cancers worldwide: a population-based study. *Lancet Glob Health* 2023; published online Sept 26. [https://doi.org/10.1016/S2214-109X\(23\)00406-0](https://doi.org/10.1016/S2214-109X(23)00406-0).

**Appendix: Quantitative estimates of preventable and treatable deaths from 36 cancers worldwide: a population-based study**

Clara Frick, Harriet Rungay, Jérôme Vignat, Ophira Ginsburg, Ellen Nolte, Freddie Bray, Isabelle Soerjomataram

## Table of Contents

|                                                                                                                                                                                                                                                                                                                                                                       |            |
|-----------------------------------------------------------------------------------------------------------------------------------------------------------------------------------------------------------------------------------------------------------------------------------------------------------------------------------------------------------------------|------------|
| <i>Extended Methods</i> .....                                                                                                                                                                                                                                                                                                                                         | <b>3</b>   |
| <i>Sensitivity analysis</i> .....                                                                                                                                                                                                                                                                                                                                     | <b>6</b>   |
| <i>Appendix Table 1: Cancer types and their potential for prevention, screening and early detection (preventable cancers) and treatment (treatable cancers)</i> .....                                                                                                                                                                                                 | <b>7</b>   |
| <i>Appendix Table 2: Premature, preventable, and treatable cancer deaths (ages 30-69) in numbers (N), proportions (%) and age-standardised rates (ASR per 100,000 person-years) by world region, Human Development Index (HDI), and Income group (Gross National Income), 2020</i> .....                                                                              | <b>10</b>  |
| <i>Appendix Table 3: Sensitivity analysis for differentiation of cancers to preventable and treatable portions of premature years of life lost (YLL) from cancer* in numbers (N) , proportions (%) and age-standardised rates (ASR per 100,000 person-years) by world region, Human Development Index (HDI), and Income group (Gross National Income), 2020</i> ..... | <b>16</b>  |
| <i>Appendix Table 4: Avertable, preventable, and treatable years of life lost (YLL) from cancer among persons aged 70-99 years in numbers (N), proportions (%) and age-standardised rates (ASR per 100,000 person-years) by world region, Human Development Index (HDI), and Income group (Gross National Income), 2020</i> .....                                     | <b>32</b>  |
| <i>Appendix Table 5: Data sources and estimation methods for premature, preventable, treatable years of life lost (YLL) from cancer (ages 30-69) by country</i> .....                                                                                                                                                                                                 | <b>38</b>  |
| <i>Appendix Figure 1: Premature preventable years of life lost (YLL) from cancer (ages 30-69) in (a) both sexes, (b) males, and (c) females, 2020</i> .....                                                                                                                                                                                                           | <b>74</b>  |
| <i>Appendix Figure 2: Premature treatable years of life lost (YLL) from cancer (ages 30-69) in (a) both sexes, (b) males, and (c) females, 2020</i> .....                                                                                                                                                                                                             | <b>77</b>  |
| <i>Appendix Figure 3: Premature preventable proportion of total years of life lost (YLL) from cancer (ages 30-69) in (a) both sexes, (b) males, and (c) females, 2020</i> .....                                                                                                                                                                                       | <b>80</b>  |
| <i>Appendix Figure 4: Premature treatable proportion of total years of life lost from cancer (ages 30-69) in (a) both sexes, (b) males, and (c) females, 2020</i> .....                                                                                                                                                                                               | <b>83</b>  |
| <i>Appendix Figure 5: Years of life lost from premature cancer mortality (ages 30-69) according to cancer types, (a) premature (preventable and treatable combined), (b) preventable, and (c) treatable by Human Development Index, in males, 2020</i> .....                                                                                                          | <b>86</b>  |
| <i>Appendix Figure 6: Years of life lost from premature cancer mortality (ages 30-69) according to cancer types, (a) premature (preventable and treatable combined), (b) preventable, and (c) treatable by Human Development Index (HDI), in females, 2020</i> .....                                                                                                  | <b>89</b>  |
| <i>Appendix Figure 7: Proportion (%) of preventable and treatable premature years life lost (YLL) from cancer (ages 30-69) by sex and world region, 2020</i> .....                                                                                                                                                                                                    | <b>92</b>  |
| <i>Appendix Figure 8: Proportion (%) of preventable and treatable premature years of life lost (YLL) from cancer (ages 70-99 years) by sex and world region, 2020</i> .....                                                                                                                                                                                           | <b>93</b>  |
| <i>Appendix Figure 9: Gross national income (GNI per capita) and age-standardised rate (ASR) of premature years of life lost (YLL) from cancer (ages 30-69 years) by sex, 2020 (a) both sexes, (b) males (c) females</i> .....                                                                                                                                        | <b>94</b>  |
| <i>Appendix Figure 10: Human Development Index (HDI) and age-standardised rate (ASR) of premature years of life lost (YLL) from cancer by sex, 2020 (ages 30-69) (a) both sexes, (b) males, and (c) females, 2020</i> .....                                                                                                                                           | <b>97</b>  |
| <i>Appendix Figure 11: Cancer mortality data sources and methods (Taken from GLOBOCAN 2020, IARC, WHO)<sup>16</sup></i> .....                                                                                                                                                                                                                                         | <b>100</b> |
| <i>References</i> .....                                                                                                                                                                                                                                                                                                                                               | <b>101</b> |

## **Extended Methods**

### **Data Sources**

National estimation of cancer deaths was only performed for countries with a population larger than 150,000 persons (185 countries). Further information on the methods for the mortality estimates are described in a previous study.<sup>1</sup> Calculation of the age-standardised rates of premature YLL was performed using the formulae as presented in Bray & Ferlay.<sup>2</sup>

### **Methods to estimate national mortality**

There were five separate methods used to estimate the national cancer mortality for 185 countries presented in this study depending on availability of cancer mortality and incidence data in each country. Each method is referred to as 1, 2, 3, and 9 in this paper, see appendix Table 5 for a list of each method used for every country in this study. Projection of mortality rates was performed in method 1 where we had historic mortality data to allow for long-term or medium-term prediction (80 countries covering 26% of the world population). Method 2 used the most recent available national (2a) or subnational (2b) data applied to the 2020 population estimates to derive cancer deaths in 2020. No projection was performed because of the lack of long-term historical data to perform prediction. This method was used for 21 countries covering 22% of the global population. As for method 3, mortality was estimated based on incidence and survival estimates for 81 countries covering 51% of the world population. Finally, we applied method 9 where no mortality nor incidence data exist for the country, and instead used mortality rates from neighbouring countries. This method was applied for three countries covering 0.3% of the world population.

Our previous validation study showed that all five methods used to estimate national cancer mortality are likely to produce under- or over-estimates for different cancer types. Specific considerations must be taken into account according to cancer type. For example, method 1 (projection based on historical rates) is considered the gold standard. However, the model did not perform well when there were recent changes in the trends. For example, when there is a large screening or diagnostic programme implemented for a cancer type or a new treatment with a large impact on survival (and subsequently mortality) introduced, rates might change quite strongly. In this case, estimating the rate of cancer based on the most recent rates (method 2) might be more appropriate. Knowledge of these changes in countries can therefore be important when performing such estimation. Because cancer rates do not change as rapidly for many countries, method 2 (most recent rates applied to current population estimates) may be quite accurate especially when the available data are recent. For three countries used rates from neighbouring countries to derive national cancer mortality estimates; these countries were democratic republic of Korea, Samoa, and Maldives. While it is almost impossible to measure the accuracy of the mortality estimates used, a previous validation study showed that accuracy of the estimates largely depends on the ‘similarity’ of which neighbouring countries are used. In our case, to ensure that the estimates were as valid as possible, the selection of cancer data sources used to estimate each country was based on cancer data and expert consultation from each region studied.

We estimated uncertainty intervals (95% UI) of cancer deaths and YLL using information on three data quality components of the underlying mortality data in each country, as described by Ferlay et al.<sup>1</sup> Briefly, the standard error of the crude rate of cancer mortality was corrected based on: i) the coverage of the national population which is covered by the registry/data source; ii) the lag time between the most recent data available for the population and the year of the estimates (2020); and iii) the quality of the mortality data i.e. the completeness and accuracy of the mortality data.

### **Analytical approach**

We applied a disease-approach when estimating the proportions of cancer deaths that were avoidable (or avertable), preventable and treatable, based on a method first suggested by Charlton,<sup>3</sup> further refined by Nolte et al.,<sup>4</sup> and finally used by the Organisation for Economic Co-operation and Development (OECD) and Eurostat.<sup>5</sup> This disease-approach to estimate avoidable mortality focusses on the nature of the disease as a possible cause of avoidable death, rather than the specific risk factors causally linked to the disease. Another assumption that we used in this study is that of equity in treatment and health outcomes, here pertaining to cancer deaths, which laid the foundation for the approach we used to estimate years of life lost.

To estimate avoidable, preventable and treatable cancers, we used the definition of premature mortality as defined by the World Health Organization (WHO), which classified all deaths between and including 30-69 years as premature. Lists of cancer types grouped into preventable or treatable have been presented previously, yet due to health care advances over time this list needs continuous adaptation. Although based on evidence and prior studies as much as possible, the attribution of a health outcome (in this case, cancer type) to preventable or treatable is, inherently, a somewhat arbitrary choice. Review and expert consultation have been the main sources of information in guiding the decisions of specific cut-off values in PAF and 5-year net survival. Other methods such as assessing changes and trends over time in cancer mortality has also informed our decision for these thresholds. For treatable cancers, previous studies have set cancer survival higher than 50% (in a certain country for a specific cancer type) as an indicator to categorise a cancer type as treatable.<sup>4</sup> The most recent published data available on cancer-specific survival was retrieved to inform this study; Appendix Table 1 shows the survival estimates found. As for preventable cancers, to our knowledge, no specific threshold has been set up prior to this study. In this study, we used a threshold of 30% for cancer-specific population-attributable fraction as a lower end of the reported varying proportion of incident cancers attributable to risk factors that has been reported from diverse studies (33% in Australia,<sup>6</sup> 38% in the UK,<sup>7</sup> and 42% in the US<sup>8</sup>). We performed a literature search to identify the main studies reporting population-attributable fractions within a population, and used, in order of priority, studies with the most comprehensive list of risk factors to ensure that a common approach and methodology was used (Appendix Table 1).

Both the survival and the PAF estimates are used to categorise cancers into the theoretically preventable or treatable group of cancer types. We did not apply the cancer-specific PAF values to each country's preventability estimates. Including a PAF estimate of all risk factors per cancer type allows us to account for the heterogeneity in risk factors between countries without constructing different lists of preventable and treatable

cancers per country. Using this approach, we aimed to identify a comprehensive list of theoretically avoidable cancers in all countries worldwide. This approach also disentangles the potential of over- or under-estimation of the role of a certain risk factor or medical intervention on avoidable cancer death estimates in countries. There are indeed differences in the background prevalence of risk factors or availability of or access to cancer care across countries. Possible future studies on avoidable, preventable, and treatable cancer should aim to include country-specific data in a similar exercise. The method we used to estimate avoidable, preventable, and treatable cancers is highly valuable as a measure to assess the quality or effectiveness of a health care system. However, our results also suggest that further research is needed to be able to draw any conclusions about a direct relationship between HDI and other factors that influence the global burden of premature mortality and differences between countries (Appendix Figure 9,10).

Secondly, to estimate the years of life lost, we used a standard life table, following the approach of Murray et al.<sup>9</sup> This is done under the premises of treating each death equally. For example, a person who died at the age of 50 from cervical cancer in the United Kingdom should contribute equally to the year of life lost estimate as a person who died from the cancer at the same age in Indonesia. Treating life events equally ensures comparability of the burden of disease across populations and time. While there are multiple life tables available using period, cohort or other estimation methods, we opted for a standard life table published and used by the WHO to ensure comparability to other major global studies.

## Sensitivity analysis

We conducted a sensitivity analysis to assess the robustness of our estimates by quantifying the effect of changing the upper and lower limits of the threshold for categorising a given cancer as either preventable or treatable. In scenario one, we reduced the PAF threshold from 30% to 20% for a cancer to be categorised as preventable and increased the threshold of 5-year net survival from 50% to 60% for a treatable cancer (Appendix Table 3). In scenario two, we increased the PAF threshold from 30% to 40% and decreased the threshold of 5-year net survival from 50% to 40%. When we reduced the threshold for preventable cancer deaths to a PAF of 20% of cancer cases attributable to modifiable risk factors, the proportion of preventable premature cancer deaths decreased from 68% (124 million/183 million) to 64% (116 million/183 million), and thus the treatable proportion increased from 32% (58.5 million/183 million) to 36% (66.6 million/183 million, appendix Table 3). Conversely, when we increased the threshold for treatable cancer deaths to 5-year relative survival to 60%, the proportion of preventable premature cancer deaths increased to 74% (135 million/183 million), and the treatable proportion decreased to 26% (47.9 million/182 million).

Finally, we also calculated the age-standardised avoidable YLL from cancer in adults of the ages 70-99 years, by region and sex to assess the burden of cancer deaths in these age groups (Appendix Table 4, Appendix Figure 8). Up to 50% of YLL from cancer occurred in adults of the ages 70-99 years in settings with high life expectancies, such as Northern Europe and Australia and New Zealand, in contrast to the comparatively lower premature YLL in those areas. This substantial number of avoidable deaths in older ages in addition to the global increase in life expectancy indicate the importance of further research on avoidable deaths in older ages.

**Appendix Table 1: Cancer types and their potential for prevention, screening and early detection (preventable cancers) and treatment (treatable cancers)**

| Cancer site (ICD-10)                                          | Preventable cancers* | Treatable cancers* | Comments: Risk factors**8,10                                                                                  | PAF (%)***                                                                           | 5-year survival (%)****11 |
|---------------------------------------------------------------|----------------------|--------------------|---------------------------------------------------------------------------------------------------------------|--------------------------------------------------------------------------------------|---------------------------|
| <b>Lip, oral cavity (C00-06)</b>                              | X                    | X                  | Tobacco smoking, alcohol, unhealthy diet, infection                                                           | 62 global (B) <sup>12</sup>                                                          |                           |
| Lip (C00·0-C00·2, C00·6, C00·8-C00·9)                         |                      |                    |                                                                                                               |                                                                                      | 93 (M)<br>96 (F)          |
| Oral Cavity (C00·3-C00·5, C02-C04<br>C05·0, C05·8-C05·9, C06) |                      |                    |                                                                                                               |                                                                                      | 61 (M)<br>69 (F)          |
| <b>Salivary glands (C07-08)</b>                               |                      | X                  | Ionizing radiation                                                                                            | Not reported                                                                         | 68 (M)<br>85 (F)          |
| <b>Oropharynx (C09-10)</b>                                    |                      | X                  | Alcohol, unhealthy diet, infection                                                                            | 26 global (B) <sup>12</sup>                                                          | 65 (M)<br>66 (F)          |
| <b>Nasopharynx (C11)</b>                                      | X                    | X                  | Infection                                                                                                     | 49 global (B) <sup>12</sup><br>86 global attributable to infection (B) <sup>13</sup> | 65 (M)<br>73 (F)          |
| <b>Hypopharynx (C12-13)</b>                                   | X                    | X                  | Alcohol, unhealthy diet                                                                                       | Not reported                                                                         | 24 (M)<br>30 (F)          |
| <b>Oesophagus (C15)</b>                                       | X                    |                    | Tobacco smoking, alcohol, overweight & obesity, ionizing radiation,                                           | 68 global (B) <sup>12</sup>                                                          | 18 (M)<br>23 (F)          |
| <b>Stomach (C16)</b>                                          | X                    |                    | Tobacco smoking, unhealthy diet, infection, ionizing radiation                                                | 24 global (B) <sup>12</sup><br>75 global attributable to infection (B) <sup>13</sup> | 28 (M)<br>32 (F)          |
| <b>Colon (C18)</b>                                            | X                    | X                  | Tobacco smoking, alcohol, unhealthy diet, overweight & obesity, ionizing radiation, lack of physical exercise | 58 global for colorectal (B) <sup>12</sup>                                           | 68 (M)<br>71 (F)          |
| <b>Rectum (C19-20)</b>                                        | X                    | X                  | Tobacco smoking, alcohol, unhealthy diet, overweight & obesity, ionizing radiation, lack of physical exercise | 58 global for colorectal (B) <sup>12</sup>                                           | 69 (M)<br>72 (F)          |
| <b>Anus (C21)</b>                                             | X                    | X                  | Infection                                                                                                     | 88 global attributable to infection (B) <sup>13</sup>                                | 56 (M)<br>58 (F)          |
| <b>Liver and intrahepatic bile ducts (C22)</b>                | X                    |                    | Tobacco smoking, alcohol, overweight & obesity, infection, ionizing radiation                                 | 53 global (B) <sup>12</sup><br>77 global attributable to infection (B) <sup>13</sup> | 18 (M)<br>20 (F)          |
| <b>Gallbladder (C23)</b>                                      | X                    | X                  | Overweight and obesity                                                                                        | 15 global (B) <sup>12</sup>                                                          | 20 (M)<br>20 (F)          |
| <b>Pancreas (C25)</b>                                         | X                    |                    | Tobacco smoking, unhealthy diet, overweight and obesity, ionizing radiation                                   | 33 global (B) <sup>12</sup>                                                          | 13 (M)<br>14 (F)          |



|                                            |   |   |                                                                                                                                                                                                      |                                                          |                  |
|--------------------------------------------|---|---|------------------------------------------------------------------------------------------------------------------------------------------------------------------------------------------------------|----------------------------------------------------------|------------------|
| <i>Larynx (C32)</i>                        | X | X | Tobacco smoking, alcohol, diet, infection                                                                                                                                                            | 71 global (B) <sup>12</sup>                              | 68 (M)<br>62 (F) |
| <b>Trachea, bronchus and lung (C33-34)</b> | X |   | Tobacco smoking, unhealthy diet, second-hand smoke, ionizing radiation, air pollution, chemical exposure: arsenic in water                                                                           | 80 global (B) <sup>12</sup>                              | 21 (M)<br>28 (F) |
| <b>Melanoma of skin (C43)</b>              | X | X | UV exposure from sunlight, indoor tanning                                                                                                                                                            | 76 global attributable to UV radiation (B) <sup>14</sup> | 92 (M)<br>96 (F) |
| <i>Skin, non-melanoma (C44)</i>            | X | X | UV exposure from sunlight                                                                                                                                                                            | 83 attributable to UV radiation (B) <sup>15</sup>        | 93 (M)<br>96 (F) |
| <b>Mesothelioma (C45)</b>                  | X |   | Asbestos                                                                                                                                                                                             | 92 global (B) <sup>12</sup>                              | 10 (M)<br>12 (F) |
| <i>Kaposi Sarcoma (C46)</i>                | X |   | Infection                                                                                                                                                                                            | 100 global attributable to infection (B) <sup>13</sup>   | 56 (M)<br>58 (F) |
| <b>Female breast (C50)</b>                 | X | X | Tobacco smoking, alcohol, unhealthy diet, overweight and obesity, ionizing radiation, exogenous hormones: hormone replacement therapy, oral contraceptives, breastfeeding, lack of physical exercise | 25 global (F) <sup>12</sup>                              | 91 (F)           |
| <i>Vulva (C51)</i>                         | X | X | Infection                                                                                                                                                                                            | 43 global attributable to infection (F) <sup>13</sup>    | 64 (F)           |
| <i>Vagina (C52)</i>                        | X | X | Infection                                                                                                                                                                                            | 70 global attributable to infection (F) <sup>13</sup>    | 64 (F)           |
| <b>Cervix uteri (C53)</b>                  | X |   | Tobacco smoking, infection, hormonal contraceptives                                                                                                                                                  | 100 global attributable to infection (F) <sup>13</sup>   | 72 (F)           |
| <b>Corpus uteri (C54)</b>                  | X | X | Overweight and obesity, lack of physical exercise                                                                                                                                                    | 40 global (F) <sup>12</sup>                              | 85 (F)           |
| <i>Ovary (C56)</i>                         | X | X | Tobacco smoking, overweight and obesity, ionizing radiation, exogenous hormones                                                                                                                      | 14 global (F) <sup>12</sup>                              | 49 (F)           |
| <i>Penis (C60)</i>                         | X | X | Infection                                                                                                                                                                                            | 50 global attributable to infection (M) <sup>13</sup>    | 76 (M)           |
| <i>Prostate (C61)</i>                      |   | X | Ionizing radiation                                                                                                                                                                                   | 6 global (M) <sup>12</sup>                               | 93 (M)           |
| <b>Testis (C62)</b>                        |   | X |                                                                                                                                                                                                      | 0 global (M) <sup>12</sup>                               | 97 (M)           |
| <i>Kidney and renal pelvis (C64-65)</i>    | X | X | Tobacco smoking, overweight and obesity, ionizing radiation                                                                                                                                          | 34 global (B) <sup>12</sup>                              | 75 (M)<br>76 (F) |
| <b>Bladder (C67)</b>                       | X | X | Tobacco smoking, chemical exposure: arsenic in water; ionizing radiation                                                                                                                             | 44 global (B) <sup>12</sup>                              | 81 (M)<br>75 (F) |

|                                                                                                                                  |   |   |                                                                        |  |                                                       |                  |
|----------------------------------------------------------------------------------------------------------------------------------|---|---|------------------------------------------------------------------------|--|-------------------------------------------------------|------------------|
| <b>Brain, central nervous system (C70-72)</b>                                                                                    |   | X |                                                                        |  | 0 global (B) <sup>12</sup>                            | 57 (M)<br>74 (F) |
| <b>Thyroid (C73)</b>                                                                                                             |   | X | Ionizing radiation                                                     |  | 10 global (B) <sup>12</sup>                           | 88 (M)<br>93 (F) |
| <b>Hodgkin lymphoma (C81)</b>                                                                                                    | X | X | Infection                                                              |  | 49 global attributable to infection (B) <sup>13</sup> | 91 (M)<br>90 (F) |
| <b>Non-Hodgkin lymphoma (C82-86, C96)</b>                                                                                        | X | X | Infection, chemical exposure: benzene in indoor pollution              |  | 74 global attributable to infection (B) <sup>13</sup> | 74 (M)<br>78 (F) |
| <b>Multiple myeloma and immunoproliferative diseases (C88+90)</b>                                                                |   | X | Chemical exposure: Benzene in indoor pollution                         |  | 7 global (B) <sup>12</sup>                            | 59 (M)<br>60 (F) |
| <b>Leukaemia (C91-95) incl. acute, chronic, other and unspecified lymphatic leukaemias as well as chronic myeloid leukaemias</b> |   | X | Ionizing radiation, chemical exposure: benzene in indoor air pollution |  | 25 global (B) <sup>12</sup>                           |                  |
| Acute lymphatic leukaemias                                                                                                       |   |   |                                                                        |  |                                                       | 64 (M)<br>60 (F) |
| Chronic lymphatic leukaemias                                                                                                     |   |   |                                                                        |  |                                                       | 88 (M)<br>92 (F) |
| Other and unspecified lymphatic leukaemias                                                                                       |   |   |                                                                        |  |                                                       | 82 (M)<br>72 (F) |
| Acute myeloid leukaemias                                                                                                         |   |   |                                                                        |  |                                                       | 29 (M)<br>30 (F) |
| Chronic myeloid leukaemias                                                                                                       |   |   |                                                                        |  |                                                       | 62 (M)<br>68 (F) |
| Other and unspecified myeloid leukaemia                                                                                          |   |   |                                                                        |  |                                                       | 23 (M)<br>16 (F) |
| <b>Other specified sites (C17, C24, C30-31, C37-38, C40-41, C47-49, C57-58, C63, C66, C68-69, C74-75)</b>                        |   | X | Varies                                                                 |  | Not reported                                          | 56 (M)<br>58 (F) |
| <b>Unspecified sites (C76-80, C97)</b>                                                                                           | X | X | Varies                                                                 |  | Not reported                                          | 21 (M)<br>19 (F) |

\*Criterion for preventable cancer was a global population attributable fraction (PAF)  $\geq 30\%$  and for treatable cancer, a 5-year relative survival  $\geq 50\%$  in benchmark (NORDCAN, 2015-2019) countries. If both or neither criteria were met, the cancer was classified as both preventable and treatable. \*\*Note, the list of risk factors for each cancer site is not intended to be comprehensive. \*\*\*The PAF for infection was estimated separately, the larger one of the two estimates was used for the classification of the cancer. \*\*\*\*NORDCAN countries included Denmark, Finland, Iceland, Norway and Sweden. The survival estimates for other specified sites and unspecified sites were derived from the NORDCAN group of other specified sites (C21, C37, C38-0-C38-3, C38-8, C45-1, C45-2, C45-7, C46-C48, C74, C75-0, C75-4-C75-9) and other and ill-defined sites (C26, C39, C76-C80, C97). For these, an estimate of PAF was not reported and only eligibility for treatability could be considered. The survival estimate for nasopharynx cancer in Females was from 2010, a more recent estimate was not available. Cancer types in italics are those cancers that we added to the OECD and Eurostat list<sup>5</sup>. Where estimates of both PAF and relative survival were not available or the criteria not met, we considered the cancer as both preventable and treatable given predominance of one or the other could not be determined, as was the case for gallbladder and ovarian cancer. (B) = both sexes, (M) = males, (F) = females

**Appendix Table 2: Premature, preventable, and treatable cancer deaths (ages 30-69) in numbers (N), proportions (%) and age-standardised rates (ASR per 100,000 person-years) by world region, Human Development Index (HDI), and Income group (Gross National Income), 2020**

| World Region    | Sex | Total cancer deaths |                    | Premature cancer mortality |                    |    |     |            | Premature preventable cancer mortality |                   |    |     |            | Premature treatable cancer mortality |                  |    |     |          |
|-----------------|-----|---------------------|--------------------|----------------------------|--------------------|----|-----|------------|----------------------------------------|-------------------|----|-----|------------|--------------------------------------|------------------|----|-----|----------|
|                 |     | N                   | UI                 | N                          | UI                 | %  | ASR | UI         | N                                      | UI                | %  | ASR | UI         | N                                    | UI               | %  | ASR | UI       |
| Eastern Africa  | B   | 222,200             | (210,400, 234,700) | 149,600                    | (141,600, 157,900) | 67 | 160 | (150, 160) | 96,600                                 | (91,500, 102,000) | 65 | 100 | (90, 110)  | 52,900                               | (50,100, 55,900) | 35 | 60  | (50, 60) |
|                 | M   | 88,000              | (80,700, 96,000)   | 52,200                     | (47,900, 56,900)   | 59 | 120 | (110, 130) | 29,200                                 | (26,700, 31,800)  | 56 | 60  | (60, 70)   | 23,000                               | (21,100, 25,100) | 44 | 50  | (50, 60) |
|                 | F   | 134,200             | (124,900, 144,000) | 97,400                     | (90,700, 104,500)  | 73 | 190 | (180, 200) | 67,500                                 | (62,800, 72,400)  | 69 | 130 | (120, 140) | 29,900                               | (27,800, 32,100) | 31 | 60  | (50, 60) |
| Middle Africa   | B   | 71,600              | (67,800, 75,600)   | 47,500                     | (44,900, 50,100)   | 66 | 130 | (120, 140) | 28,900                                 | (27,400, 30,500)  | 61 | 80  | (70, 80)   | 18,600                               | (17,600, 19,600) | 39 | 50  | (50, 50) |
|                 | M   | 31,800              | (29,100, 34,700)   | 18,700                     | (17,100, 20,400)   | 59 | 110 | (100, 120) | 9,600                                  | (8,800, 10,500)   | 52 | 50  | (50, 60)   | 9,000                                | (8,300, 9,900)   | 48 | 60  | (50, 60) |
|                 | F   | 39,800              | (37,100, 42,600)   | 28,800                     | (26,800, 30,900)   | 72 | 150 | (140, 160) | 19,300                                 | (18,000, 20,700)  | 67 | 100 | (90, 110)  | 9,500                                | (8,900, 10,200)  | 33 | 50  | (40, 50) |
| Northern Africa | B   | 191,100             | (185,800, 196,500) | 115,700                    | (112,500, 119,000) | 61 | 140 | (130, 140) | 74,400                                 | (72,300, 76,500)  | 64 | 90  | (90, 90)   | 41,400                               | (40,200, 42,500) | 36 | 50  | (50, 50) |
|                 | M   | 103,900             | (99,700, 108,300)  | 62,600                     | (60,000, 65,200)   | 60 | 150 | (150, 160) | 43,200                                 | (41,400, 45,000)  | 69 | 110 | (100, 110) | 19,400                               | (18,600, 20,200) | 31 | 50  | (50, 50) |
|                 | F   | 87,200              | (83,900, 90,600)   | 53,200                     | (51,100, 55,200)   | 61 | 120 | (120, 130) | 31,200                                 | (30,000, 32,400)  | 59 | 70  | (70, 80)   | 22,000                               | (21,100, 22,800) | 41 | 50  | (50, 50) |
| Southern Africa | B   | 61,700              | (61,000, 62,400)   | 40,600                     | (40,100, 41,000)   | 66 | 170 | (170, 180) | 26,800                                 | (26,500, 27,100)  | 66 | 110 | (110, 120) | 13,700                               | (13,600, 13,900) | 34 | 60  | (60, 60) |
|                 | M   | 29,600              | (29,100, 30,100)   | 19,000                     | (18,700, 19,300)   | 64 | 180 | (180, 190) | 11,900                                 | (11,700, 12,100)  | 63 | 110 | (110, 120) | 7,100                                | (7,000, 7,200)   | 37 | 70  | (70, 70) |
|                 | F   | 32,100              | (31,600, 32,600)   | 21,500                     | (21,200, 21,900)   | 67 | 170 | (170, 170) | 14,900                                 | (14,700, 15,100)  | 69 | 120 | (110, 120) | 6,600                                | (6,500, 6,700)   | 31 | 50  | (50, 50) |
| Western Africa  | B   | 164,900             | (154,700, 175,800) | 114,500                    | (107,400, 122,000) | 69 | 130 | (120, 140) | 66,100                                 | (62,000, 70,500)  | 58 | 70  | (70, 80)   | 48,400                               | (45,400, 51,600) | 42 | 60  | (50, 60) |
|                 | M   | 70,500              | (63,800, 78,000)   | 44,400                     | (40,200, 49,100)   | 63 | 110 | (100, 120) | 22,300                                 | (20,200, 24,700)  | 50 | 50  | (50, 60)   | 22,100                               | (20,000, 24,400) | 50 | 50  | (50, 60) |
|                 | F   | 94,400              | (86,900, 102,500)  | 70,100                     | (64,500, 76,100)   | 74 | 150 | (140, 160) | 43,800                                 | (40,300, 47,500)  | 62 | 90  | (90, 100)  | 26,300                               | (24,200, 28,600) | 38 | 60  | (50, 60) |

| World Region       | Sex | Total cancer deaths |                        | Premature cancer mortality |                        |    |     |            | Premature preventable cancer mortality |                        |    |     |            | Premature treatable cancer mortality |                    |    |     |          |
|--------------------|-----|---------------------|------------------------|----------------------------|------------------------|----|-----|------------|----------------------------------------|------------------------|----|-----|------------|--------------------------------------|--------------------|----|-----|----------|
|                    |     | N                   | UI                     | N                          | UI                     | %  | ASR | UI         | N                                      | UI                     | %  | ASR | UI         | N                                    | UI                 | %  | ASR | UI       |
| Caribbean          | B   | 66,000              | (64,500, 67,500)       | 29,200                     | (28,500, 29,900)       | 44 | 140 | (140, 150) | 17,700                                 | (17,300, 18,100)       | 61 | 90  | (90, 90)   | 11,400                               | (11,200, 11,700)   | 39 | 60  | (60, 60) |
|                    | M   | 36,300              | (35,200, 37,400)       | 14,500                     | (14,100, 15,000)       | 40 | 150 | (150, 150) | 8,600                                  | (8,300, 8,900)         | 59 | 90  | (90, 90)   | 5,900                                | (5,800, 6,100)     | 41 | 60  | (60, 60) |
|                    | F   | 29,700              | (28,600, 30,700)       | 14,600                     | (14,100, 15,200)       | 49 | 140 | (130, 140) | 9,100                                  | (8,800, 9,400)         | 62 | 90  | (80, 90)   | 5,500                                | (5,300, 5,700)     | 38 | 50  | (50, 50) |
| Central America    | B   | 126,100             | (124,900, 127,200)     | 65,000                     | (64,400, 65,600)       | 52 | 90  | (90, 100)  | 38,300                                 | (37,900, 38,600)       | 59 | 60  | (60, 60)   | 26,700                               | (26,500, 27,000)   | 41 | 40  | (40, 40) |
|                    | M   | 61,500              | (60,700, 62,400)       | 27,900                     | (27,600, 28,300)       | 45 | 90  | (90, 90)   | 15,400                                 | (15,200, 15,600)       | 55 | 50  | (50, 50)   | 12,500                               | (12,300, 12,700)   | 45 | 40  | (40, 40) |
|                    | F   | 64,500              | (63,700, 65,400)       | 37,100                     | (36,600, 37,500)       | 57 | 100 | (100, 100) | 22,800                                 | (22,500, 23,100)       | 62 | 60  | (60, 60)   | 14,200                               | (14,000, 14,400)   | 38 | 40  | (40, 40) |
| South America      | B   | 521,400             | (518,100, 524,700)     | 256,200                    | (254,600, 257,900)     | 49 | 130 | (130, 130) | 154,600                                | (153,700, 155,600)     | 60 | 80  | (80, 80)   | 101,600                              | (101,000, 102,300) | 40 | 50  | (50, 50) |
|                    | M   | 267,300             | (265,000, 269,600)     | 126,100                    | (125,000, 127,200)     | 47 | 140 | (130, 140) | 73,800                                 | (73,200, 74,500)       | 59 | 80  | (80, 80)   | 52,200                               | (51,800, 52,700)   | 41 | 60  | (60, 60) |
|                    | F   | 254,100             | (251,800, 256,400)     | 130,200                    | (129,000, 131,400)     | 51 | 130 | (130, 130) | 80,800                                 | (80,100, 81,500)       | 62 | 80  | (80, 80)   | 49,400                               | (48,900, 49,800)   | 38 | 50  | (50, 50) |
| Northern America   | B   | 699,300             | (697,100, 701,500)     | 276,200                    | (275,400, 277,100)     | 40 | 120 | (120, 120) | 177,200                                | (176,600, 177,700)     | 64 | 80  | (80, 80)   | 99,100                               | (98,800, 99,400)   | 36 | 40  | (40, 40) |
|                    | M   | 367,900             | (366,300, 369,500)     | 146,400                    | (145,700, 147,000)     | 40 | 130 | (130, 130) | 94,200                                 | (93,800, 94,600)       | 64 | 80  | (80, 80)   | 52,100                               | (51,900, 52,400)   | 36 | 50  | (50, 50) |
|                    | F   | 331,400             | (329,900, 333,000)     | 129,900                    | (129,300, 130,500)     | 39 | 110 | (110, 110) | 82,900                                 | (82,600, 83,300)       | 64 | 70  | (70, 70)   | 46,900                               | (46,700, 47,100)   | 36 | 40  | (40, 40) |
| Eastern Asia       | B   | 3,617,100           | (3,606,600, 3,627,600) | 1,908,800                  | (1,903,300, 1,914,400) | 53 | 180 | (180, 180) | 1,502,800                              | (1,498,500, 1,507,200) | 79 | 140 | (140, 140) | 406,000                              | (404,800, 407,100) | 21 | 40  | (40, 40) |
|                    | M   | 2,174,800           | (2,166,300, 2,183,300) | 1,189,600                  | (1,185,000, 1,194,300) | 55 | 230 | (230, 230) | 982,300                                | (978,500, 986,100)     | 83 | 190 | (190, 190) | 207,300                              | (206,500, 208,100) | 17 | 40  | (40, 40) |
|                    | F   | 1,442,300           | (1,436,000, 1,448,700) | 719,200                    | (716,000, 722,400)     | 50 | 140 | (140, 140) | 520,600                                | (518,300, 522,900)     | 72 | 100 | (100, 100) | 198,700                              | (197,800, 199,500) | 28 | 40  | (40, 40) |
| South-Eastern Asia | B   | 689,100             | (680,100, 698,300)     | 444,600                    | (438,800, 450,600)     | 65 | 150 | (150, 150) | 294,400                                | (290,500, 298,300)     | 66 | 100 | (100, 100) | 150,300                              | (148,300, 152,300) | 34 | 50  | (50, 50) |
|                    | M   | 373,800             | (366,600, 381,100)     | 244,400                    | (239,700, 249,100)     | 65 | 170 | (170, 180) | 167,200                                | (164,000, 170,500)     | 68 | 120 | (120, 120) | 77,100                               | (75,700, 78,700)   | 32 | 50  | (50, 60) |

| World Region       | Sex | Total cancer deaths |                        | Premature cancer mortality |                    |    |     |            | Premature preventable cancer mortality |                    |    |     |            | Premature treatable cancer mortality |                    |    |     |          |
|--------------------|-----|---------------------|------------------------|----------------------------|--------------------|----|-----|------------|----------------------------------------|--------------------|----|-----|------------|--------------------------------------|--------------------|----|-----|----------|
|                    |     | N                   | UI                     | N                          | UI                 | %  | ASR | UI         | N                                      | UI                 | %  | ASR | UI         | N                                    | UI                 | %  | ASR | UI       |
| South Central Asia | F   | 315,300             | (309,700, 321,000)     | 200,300                    | (196,700, 203,900) | 64 | 130 | (130, 140) | 127,200                                | (124,900, 129,500) | 63 | 80  | (80, 90)   | 73,100                               | (71,800, 74,400)   | 37 | 50  | (50, 50) |
|                    | B   | 1,258,700           | (1,243,800, 1,273,800) | 875,700                    | (865,300, 886,200) | 70 | 120 | (110, 120) | 534,200                                | (527,800, 540,600) | 61 | 70  | (70, 70)   | 341,600                              | (337,500, 345,700) | 39 | 40  | (40, 50) |
|                    | M   | 660,400             | (649,400, 671,500)     | 452,600                    | (445,000, 460,200) | 69 | 120 | (120, 120) | 268,700                                | (264,200, 273,200) | 59 | 70  | (70, 70)   | 183,900                              | (180,800, 187,000) | 41 | 50  | (50, 50) |
|                    | F   | 598,300             | (588,300, 608,600)     | 423,200                    | (416,000, 430,400) | 71 | 110 | (110, 110) | 265,500                                | (261,000, 270,000) | 63 | 70  | (70, 70)   | 157,700                              | (155,000, 160,400) | 37 | 40  | (40, 40) |
| Western Asia       | B   | 244,600             | (241,500, 247,600)     | 138,200                    | (136,500, 139,900) | 57 | 140 | (140, 140) | 86,000                                 | (84,900, 87,100)   | 62 | 90  | (90, 90)   | 52,200                               | (51,600, 52,900)   | 38 | 50  | (50, 50) |
|                    | M   | 141,000             | (138,700, 143,400)     | 78,500                     | (77,200, 79,800)   | 56 | 160 | (160, 170) | 52,700                                 | (51,900, 53,600)   | 67 | 110 | (110, 110) | 25,800                               | (25,300, 26,200)   | 33 | 50  | (50, 50) |
|                    | F   | 103,500             | (101,600, 105,500)     | 59,700                     | (58,600, 60,900)   | 58 | 120 | (120, 130) | 33,300                                 | (32,600, 33,900)   | 56 | 70  | (70, 70)   | 26,500                               | (26,000, 27,000)   | 44 | 50  | (50, 50) |
| Eastern Europe     | B   | 695,800             | (691,800, 699,900)     | 376,200                    | (374,000, 378,400) | 54 | 190 | (190, 200) | 242,400                                | (241,000, 243,900) | 64 | 120 | (120, 130) | 133,700                              | (132,900, 134,500) | 36 | 70  | (70, 70) |
|                    | M   | 382,000             | (379,000, 385,100)     | 223,000                    | (221,300, 224,800) | 58 | 260 | (260, 260) | 148,900                                | (147,700, 150,100) | 67 | 170 | (170, 170) | 74,200                               | (73,600, 74,800)   | 33 | 90  | (90, 90) |
|                    | F   | 313,800             | (311,200, 316,500)     | 153,100                    | (151,800, 154,400) | 49 | 150 | (140, 150) | 93,600                                 | (92,800, 94,400)   | 61 | 90  | (90, 90)   | 59,500                               | (59,000, 60,100)   | 39 | 60  | (60, 60) |
| Northern Europe    | B   | 276,600             | (274,700, 278,600)     | 81,100                     | (80,500, 81,700)   | 29 | 130 | (130, 130) | 51,300                                 | (50,900, 51,600)   | 63 | 80  | (80, 80)   | 29,800                               | (29,600, 30,000)   | 37 | 50  | (50, 50) |
|                    | M   | 147,500             | (146,100, 148,900)     | 42,900                     | (42,500, 43,300)   | 29 | 140 | (130, 140) | 27,100                                 | (26,900, 27,400)   | 63 | 80  | (80, 90)   | 15,700                               | (15,600, 15,900)   | 37 | 50  | (50, 50) |
|                    | F   | 129,100             | (127,800, 130,500)     | 38,200                     | (37,800, 38,600)   | 30 | 120 | (120, 120) | 24,100                                 | (23,900, 24,400)   | 63 | 70  | (70, 70)   | 14,100                               | (13,900, 14,200)   | 37 | 40  | (40, 40) |
| Southern Europe    | B   | 423,100             | (420,000, 426,200)     | 143,700                    | (142,700, 144,700) | 34 | 140 | (140, 140) | 94,400                                 | (93,800, 95,100)   | 66 | 90  | (90, 90)   | 49,300                               | (48,900, 49,600)   | 34 | 50  | (50, 50) |
|                    | M   | 244,000             | (241,600, 246,300)     | 85,100                     | (84,300, 85,900)   | 35 | 170 | (170, 170) | 58,000                                 | (57,500, 58,600)   | 68 | 110 | (110, 120) | 27,100                               | (26,800, 27,300)   | 32 | 50  | (50, 60) |
|                    | F   | 179,100             | (177,100, 181,100)     | 58,600                     | (57,900, 59,200)   | 33 | 110 | (110, 110) | 36,400                                 | (36,000, 36,800)   | 62 | 70  | (70, 70)   | 22,200                               | (21,900, 22,400)   | 38 | 40  | (40, 40) |
| Western Europe     | B   | 559,700             | (556,400, 562,900)     | 187,200                    | (186,100, 188,200) | 33 | 140 | (140, 150) | 124,800                                | (124,100, 125,500) | 67 | 100 | (100, 100) | 62,300                               | (62,000, 62,700)   | 33 | 50  | (50, 50) |

| World Region            | Sex | Total cancer deaths |                        | Premature cancer mortality |                        |    |     |            | Premature preventable cancer mortality |                        |    |     |            | Premature treatable cancer mortality |                    |    |     |           |
|-------------------------|-----|---------------------|------------------------|----------------------------|------------------------|----|-----|------------|----------------------------------------|------------------------|----|-----|------------|--------------------------------------|--------------------|----|-----|-----------|
|                         |     | N                   | UI                     | N                          | UI                     | %  | ASR | UI         | N                                      | UI                     | %  | ASR | UI         | N                                    | UI                 | %  | ASR | UI        |
| Australia & New Zealand | M   | 310,500             | (308,100, 313,000)     | 108,200                    | (107,400, 109,100)     | 35 | 170 | (170, 170) | 73,300                                 | (72,700, 73,900)       | 68 | 110 | (110, 110) | 34,900                               | (34,600, 35,200)   | 32 | 60  | (50, 60)  |
|                         | F   | 249,100             | (246,900, 251,300)     | 78,900                     | (78,300, 79,600)       | 32 | 120 | (120, 120) | 51,500                                 | (51,100, 52,000)       | 65 | 80  | (80, 80)   | 27,400                               | (27,200, 27,700)   | 35 | 40  | (40, 40)  |
|                         | B   | 58,700              | (58,100, 59,400)       | 18,800                     | (18,600, 19,000)       | 32 | 110 | (110, 110) | 11,600                                 | (11,400, 11,700)       | 61 | 70  | (70, 70)   | 7,300                                | (7,200, 7,300)     | 39 | 40  | (40, 40)  |
|                         | M   | 32,700              | (32,200, 33,300)       | 10,200                     | (10,000, 10,400)       | 31 | 120 | (120, 120) | 6,200                                  | (6,100, 6,300)         | 61 | 70  | (70, 70)   | 4,000                                | (3,900, 4,000)     | 39 | 50  | (50, 50)  |
|                         | F   | 26,000              | (25,500, 26,500)       | 8,600                      | (8,500, 8,800)         | 33 | 100 | (100, 100) | 5,300                                  | (5,200, 5,400)         | 62 | 60  | (60, 60)   | 3,300                                | (3,200, 3,400)     | 38 | 40  | (40, 40)  |
| Oceania excl. Aust/NZ   | B   | 10,600              | (9,100, 13,400)        | 7,200                      | (6,200, 9,100)         | 68 | 190 | (160, 240) | 4,500                                  | (3,900, 5,700)         | 63 | 120 | (100, 150) | 2,700                                | (2,300, 3,400)     | 37 | 70  | (60, 90)  |
|                         | M   | 5,200               | (4,200, 7,400)         | 3,300                      | (2,600, 4,700)         | 63 | 180 | (140, 260) | 2,000                                  | (1,600, 2,900)         | 62 | 110 | (90, 160)  | 1,200                                | (1,000, 1,800)     | 38 | 70  | (50, 100) |
|                         | F   | 5,400               | (4,400, 7,700)         | 3,900                      | (3,200, 5,600)         | 72 | 200 | (160, 280) | 2,500                                  | (2,000, 3,600)         | 63 | 120 | (100, 180) | 1,400                                | (1,200, 2,100)     | 37 | 70  | (60, 100) |
| Very High HDI           | B   | 3,478,800           | (3,404,800, 3,554,300) | 1,320,700                  | (1,292,700, 1,349,400) | 38 | 140 | (140, 140) | 863,700                                | (845,300, 882,500)     | 65 | 90  | (90, 90)   | 457,000                              | (447,300, 467,000) | 35 | 50  | (50, 50)  |
|                         | M   | 1,926,300           | (1,870,700, 1,983,600) | 756,200                    | (734,400, 778,700)     | 39 | 160 | (160, 170) | 508,900                                | (494,200, 524,100)     | 67 | 110 | (110, 110) | 247,200                              | (240,100, 254,600) | 33 | 50  | (50, 60)  |
|                         | F   | 1,552,500           | (1,504,200, 1,602,300) | 564,500                    | (547,000, 582,700)     | 36 | 120 | (110, 120) | 354,800                                | (343,700, 366,100)     | 63 | 70  | (70, 80)   | 209,800                              | (203,300, 216,500) | 37 | 40  | (40, 50)  |
| High HDI                | B   | 4,521,800           | (4,449,400, 4,595,400) | 2,604,600                  | (2,562,900, 2,647,000) | 58 | 170 | (170, 170) | 1,921,100                              | (1,890,300, 1,952,300) | 74 | 130 | (120, 130) | 683,500                              | (672,600, 694,600) | 26 | 40  | (40, 50)  |
|                         | M   | 2,625,400           | (2,568,200, 2,683,800) | 1,535,000                  | (1,501,600, 1,569,200) | 58 | 200 | (200, 210) | 1,187,200                              | (1,161,300, 1,213,600) | 77 | 160 | (150, 160) | 347,800                              | (340,200, 355,500) | 23 | 50  | (50, 50)  |
|                         | F   | 1,896,400           | (1,851,900, 1,942,000) | 1,069,600                  | (1,044,500, 1,095,300) | 56 | 140 | (140, 140) | 733,900                                | (716,600, 751,500)     | 69 | 90  | (90, 100)  | 335,700                              | (327,800, 343,800) | 31 | 40  | (40, 40)  |
| Medium HDI              | B   | 1,513,200           | (1,453,600, 1,575,300) | 1,053,200                  | (1,011,700, 1,096,400) | 70 | 120 | (120, 130) | 662,500                                | (636,400, 689,700)     | 63 | 80  | (80, 80)   | 390,700                              | (375,300, 406,700) | 37 | 50  | (40, 50)  |
|                         | M   | 788,500             | (739,100, 841,200)     | 545,100                    | (510,900, 581,500)     | 69 | 130 | (120, 140) | 338,600                                | (317,300, 361,200)     | 62 | 80  | (80, 90)   | 206,500                              | (193,600, 220,300) | 38 | 50  | (50, 50)  |
|                         | F   | 724,800             | (688,500, 762,900)     | 508,100                    | (482,700, 534,900)     | 70 | 120 | (110, 130) | 324,000                                | (307,800, 341,000)     | 64 | 80  | (70, 80)   | 184,100                              | (174,900, 193,800) | 36 | 40  | (40, 50)  |

| World Region        | Sex | Total cancer deaths |                         | Premature cancer mortality |                        |    |     |            | Premature preventable cancer mortality |                        |    |     |            | Premature treatable cancer mortality |                        |    |     |          |
|---------------------|-----|---------------------|-------------------------|----------------------------|------------------------|----|-----|------------|----------------------------------------|------------------------|----|-----|------------|--------------------------------------|------------------------|----|-----|----------|
|                     |     | N                   | UI                      | N                          | UI                     | %  | ASR | UI         | N                                      | UI                     | %  | ASR | UI         | N                                    | UI                     | %  | ASR | UI       |
| Low HDI             | B   | 439,900             | (374,400, 516,800)      | 295,300                    | (251,300, 347,000)     | 67 | 140 | (120, 160) | 178,300                                | (151,800, 209,500)     | 60 | 80  | (70, 100)  | 117,000                              | (99,600, 137,400)      | 40 | 50  | (50, 60) |
|                     | M   | 186,200             | (146,500, 236,700)      | 112,100                    | (88,200, 142,500)      | 60 | 110 | (90, 140)  | 59,400                                 | (46,700, 75,500)       | 53 | 60  | (50, 70)   | 52,700                               | (41,500, 67,000)       | 47 | 50  | (40, 70) |
|                     | F   | 253,600             | (204,000, 315,400)      | 183,200                    | (147,400, 227,800)     | 72 | 160 | (130, 200) | 119,000                                | (95,700, 147,900)      | 65 | 100 | (80, 130)  | 64,300                               | (51,700, 79,900)       | 35 | 60  | (40, 70) |
| High income         | B   | 2,702,300           | (2,682,000, 2,723,000)  | 915,900                    | (909,000, 922,900)     | 34 | 130 | (130, 130) | 593,800                                | (589,300, 598,300)     | 65 | 80  | (80, 80)   | 322,100                              | (319,700, 324,600)     | 35 | 50  | (50, 50) |
|                     | M   | 1,482,400           | (1,467,300, 1,497,900)  | 512,300                    | (507,100, 517,700)     | 35 | 150 | (140, 150) | 337,800                                | (334,300, 341,300)     | 66 | 100 | (90, 100)  | 174,600                              | (172,800, 176,400)     | 34 | 50  | (50, 50) |
|                     | F   | 1,219,900           | (1,206,300, 1,233,900)  | 403,600                    | (399,100, 408,200)     | 33 | 110 | (110, 120) | 256,000                                | (253,100, 258,900)     | 63 | 70  | (70, 70)   | 147,600                              | (145,900, 149,300)     | 37 | 40  | (40, 40) |
| Upper middle income | B   | 4,464,300           | (4,440,500, 4,488,500)  | 2,527,200                  | (2,513,700, 2,540,900) | 57 | 180 | (180, 180) | 1,883,100                              | (1,873,100, 1,893,300) | 75 | 130 | (130, 130) | 644,000                              | (640,600, 647,500)     | 25 | 50  | (50, 50) |
|                     | M   | 2,604,500           | (2,586,400, 2,623,100)  | 1,508,600                  | (1,498,000, 1,519,400) | 58 | 220 | (210, 220) | 1,181,100                              | (1,172,900, 1,189,600) | 78 | 170 | (170, 170) | 327,400                              | (325,200, 329,800)     | 22 | 50  | (50, 50) |
|                     | F   | 1,859,700           | (1,844,400, 1,875,400)  | 1,018,600                  | (1,010,200, 1,027,200) | 55 | 140 | (140, 140) | 702,000                                | (696,200, 707,900)     | 69 | 100 | (100, 100) | 316,600                              | (314,000, 319,300)     | 31 | 40  | (40, 40) |
| Lower middle income | B   | 2,110,400           | (2,052,500, 2,172,400)  | 1,449,800                  | (1,410,000, 1,492,400) | 69 | 130 | (130, 130) | 900,800                                | (876,100, 927,200)     | 62 | 80  | (80, 80)   | 549,000                              | (534,000, 565,100)     | 38 | 50  | (50, 50) |
|                     | M   | 1,101,300           | (1,057,600, 1,149,900)  | 751,500                    | (721,700, 784,700)     | 68 | 140 | (130, 140) | 462,700                                | (444,400, 483,100)     | 62 | 80  | (80, 90)   | 288,800                              | (277,400, 301,600)     | 38 | 50  | (50, 50) |
|                     | F   | 1,009,100           | (971,500, 1,050,400)    | 698,300                    | (672,200, 726,800)     | 69 | 120 | (120, 130) | 438,100                                | (421,700, 456,000)     | 63 | 80  | (70, 80)   | 260,200                              | (250,500, 270,800)     | 37 | 50  | (40, 50) |
| Low income          | B   | 314,400             | (288,900, 342,900)      | 209,100                    | (192,100, 228,000)     | 67 | 140 | (130, 160) | 132,500                                | (121,800, 144,500)     | 63 | 90  | (80, 100)  | 76,500                               | (70,400, 83,500)       | 37 | 50  | (50, 60) |
|                     | M   | 130,800             | (114,800, 150,000)      | 77,900                     | (68,300, 89,400)       | 60 | 120 | (100, 130) | 45,000                                 | (39,500, 51,600)       | 58 | 70  | (60, 80)   | 32,900                               | (28,800, 37,700)       | 42 | 50  | (40, 60) |
|                     | F   | 183,600             | (164,500, 205,700)      | 131,200                    | (117,500, 147,000)     | 71 | 170 | (150, 190) | 87,500                                 | (78,400, 98,000)       | 67 | 110 | (100, 130) | 43,700                               | (39,100, 48,900)       | 33 | 50  | (50, 60) |
| World               | B   | 9,958,100           | (9,721,100, 10,200,900) | 5,275,900                  | (5,150,400, 5,404,600) | 53 | 150 | (150, 150) | 3,627,000                              | (3,540,700, 3,715,500) | 69 | 100 | (100, 110) | 1,648,900                            | (1,609,700, 1,689,100) | 31 | 50  | (50, 50) |
|                     | M   | 5,528,800           | (5,351,700, 5,711,800)  | 2,949,500                  | (2,855,000, 3,047,100) | 53 | 170 | (170, 180) | 2,094,800                              | (2,027,700, 2,164,200) | 71 | 120 | (120, 130) | 854,600                              | (827,300, 882,900)     | 29 | 50  | (50, 50) |

| World Region | Sex | Total cancer deaths |                           | Premature cancer mortality |                           |    | Premature preventable cancer mortality |               |           |                           |    | Premature treatable cancer mortality |             |         |                       |    |     |             |
|--------------|-----|---------------------|---------------------------|----------------------------|---------------------------|----|----------------------------------------|---------------|-----------|---------------------------|----|--------------------------------------|-------------|---------|-----------------------|----|-----|-------------|
|              |     | N                   | UI                        | N                          | UI                        | %  | ASR                                    | UI            | N         | UI                        | %  | ASR                                  | UI          | N       | UI                    | %  | ASR | UI          |
|              | F   | 4,429,300           | (4,273,600,<br>4,590,800) | 2,326,400                  | (2,244,600,<br>2,411,200) | 53 | 130                                    | (130,<br>140) | 1,532,200 | (1,478,300,<br>1,588,000) | 66 | 90                                   | (80,<br>90) | 794,300 | (766,300,<br>823,200) | 34 | 40  | (40,<br>50) |

B: both sexes, M: males, F: females, UI: Uncertainty Interval



**Appendix Table 3: Sensitivity analysis for *differentiation* of cancers to preventable and treatable *portions of premature* years of life lost (YLL) from cancer\* in numbers (N) , proportions (%) and age-standardised rates (ASR per 100,000 person-years) by world region, Human Development Index (HDI), and Income group (Gross National Income), 2020**

| World Region   | Sex           | Classification Thresholds |                | Total YLL |                        | Premature cancer mortality |                        |                        |       | Premature preventable cancer mortality |                |                        |                        |       | Premature treatable cancer mortality |                |                        |                    |       |                |                |
|----------------|---------------|---------------------------|----------------|-----------|------------------------|----------------------------|------------------------|------------------------|-------|----------------------------------------|----------------|------------------------|------------------------|-------|--------------------------------------|----------------|------------------------|--------------------|-------|----------------|----------------|
|                |               | PAF (%)                   | Rel. Surv. (%) | N         | UI                     | N                          | UI                     | %                      | ASR   | UI                                     | N              | UI                     | %                      | ASR   | UI                                   | N              | UI                     | %                  | ASR   | UI             |                |
| Eastern Africa | B             | 30                        | 50             | 8,592,600 | (8,136,000, 9,074,700) | 5,848,800                  | (5,538,000, 6,177,000) | 68                     | 5,700 | (5,400, 6,000)                         | 3,796,900      | (3,595,100, 4,009,900) | 65                     | 3,700 | (3,500, 3,900)                       | 2,052,000      | (1,942,900, 2,167,100) | 35                 | 2,000 | (1,900, 2,100) |                |
|                |               | 20                        | 60             | 8,592,600 | (8,136,000, 9,074,700) | 5,848,800                  | (5,538,000, 6,177,000) | 68                     | 5,700 | (5,400, 6,000)                         | 4,199,600      | (3,976,400, 4,435,200) | 72                     | 4,100 | (3,800, 4,300)                       | 1,649,300      | (1,561,600, 1,741,800) | 28                 | 1,600 | (1,500, 1,700) |                |
|                |               | 40                        | 40             | 8,592,600 | (8,136,000, 9,074,700) | 5,848,800                  | (5,538,000, 6,177,000) | 68                     | 5,700 | (5,400, 6,000)                         | 3,642,700      | (3,449,200, 3,847,100) | 62                     | 3,500 | (3,300, 3,700)                       | 2,206,100      | (2,088,900, 2,329,900) | 38                 | 2,200 | (2,100, 2,300) |                |
|                | M             | 30                        | 50             | 3,345,100 | (3,067,300, 3,648,000) | 1,987,300                  | (1,822,300, 2,167,300) | 59                     | 4,200 | (3,800, 4,600)                         | 1,140,100      | (1,045,400, 1,243,400) | 57                     | 2,300 | (2,100, 2,500)                       | 847,200        | (776,900, 924,000)     | 43                 | 1,900 | (1,700, 2,000) |                |
|                |               | 20                        | 60             | 3,345,100 | (3,067,300, 3,648,000) | 1,987,300                  | (1,822,300, 2,167,300) | 59                     | 4,200 | (3,800, 4,600)                         | 1,345,100      | (1,233,400, 1,466,900) | 68                     | 2,700 | (2,500, 3,000)                       | 642,200        | (588,900, 700,400)     | 32                 | 1,400 | (1,300, 1,600) |                |
|                |               | 40                        | 40             | 3,345,100 | (3,067,300, 3,648,000) | 1,987,300                  | (1,822,300, 2,167,300) | 59                     | 4,200 | (3,800, 4,600)                         | 1,108,500      | (1,016,500, 1,208,900) | 56                     | 2,300 | (2,100, 2,500)                       | 878,800        | (805,800, 958,400)     | 44                 | 1,900 | (1,800, 2,100) |                |
|                | F             | 30                        | 50             | 5,247,500 | (4,887,500, 5,634,000) | 3,861,500                  | (3,596,600, 4,145,900) | 74                     | 7,100 | (6,600, 7,600)                         | 2,656,700      | (2,474,500, 2,852,400) | 69                     | 4,900 | (4,600, 5,300)                       | 1,204,700      | (1,122,100, 1,293,500) | 31                 | 2,200 | (2,000, 2,300) |                |
|                |               | 20                        | 60             | 5,247,500 | (4,887,500, 5,634,000) | 3,861,500                  | (3,596,600, 4,145,900) | 74                     | 7,100 | (6,600, 7,600)                         | 2,854,400      | (2,658,600, 3,064,700) | 74                     | 5,300 | (4,900, 5,600)                       | 1,007,000      | (938,000, 1,081,200)   | 26                 | 1,800 | (1,700, 2,000) |                |
|                |               | 40                        | 40             | 5,247,500 | (4,887,500, 5,634,000) | 3,861,500                  | (3,596,600, 4,145,900) | 74                     | 7,100 | (6,600, 7,600)                         | 2,534,200      | (2,360,400, 2,720,900) | 66                     | 4,700 | (4,300, 5,000)                       | 1,327,300      | (1,236,200, 1,425,000) | 34                 | 2,400 | (2,200, 2,600) |                |
|                | Middle Africa | B                         | 30             | 50        | 2,708,500              | (2,564,300, 2,860,900)     | 1,857,900              | (1,759,000, 1,962,500) | 69    | 4,700                                  | (4,400, 4,900) | 1,142,300              | (1,081,400, 1,206,500) | 61    | 2,900                                | (2,700, 3,000) | 715,700                | (677,600, 756,000) | 39    | 1,800          | (1,700, 1,900) |
|                |               |                           | 20             | 60        | 2,708,500              | (2,564,300, 2,860,900)     | 1,857,900              | (1,759,000, 1,962,500) | 69    | 4,700                                  | (4,400, 4,900) | 1,270,100              | (1,202,400, 1,341,500) | 68    | 3,200                                | (3,000, 3,300) | 587,900                | (556,600, 620,900) | 32    | 1,500          | (1,400, 1,600) |
|                |               |                           | 40             | 40        | 2,708,500              | (2,564,300, 2,860,900)     | 1,857,900              | (1,759,000, 1,962,500) | 69    | 4,700                                  | (4,400, 4,900) | 1,091,600              | (1,033,500, 1,153,000) | 59    | 2,700                                | (2,600, 2,900) | 766,300                | (725,500, 809,400) | 41    | 2,000          | (1,900, 2,100) |
| M              |               | 30                        | 50             | 1,136,700 | (1,041,200, 1,240,800) | 700,300                    | (641,500, 764,400)     | 62                     | 3,800 | (3,500, 4,100)                         | 378,700        | (346,900, 413,400)     | 54                     | 2,000 | (1,800, 2,100)                       | 321,500        | (294,500, 351,000)     | 46                 | 1,800 | (1,700, 2,000) |                |

| World Region    | Sex | Classification Thresholds |                | Total YLL              |                        | Premature cancer mortality |                        |       |                | Premature preventable cancer mortality |                        |                        |       |                | Premature treatable cancer mortality |                    |                        |       |                |                |
|-----------------|-----|---------------------------|----------------|------------------------|------------------------|----------------------------|------------------------|-------|----------------|----------------------------------------|------------------------|------------------------|-------|----------------|--------------------------------------|--------------------|------------------------|-------|----------------|----------------|
|                 |     | PAF (%)                   | Rel. Surv. (%) | N                      | UI                     | N                          | UI                     | %     | ASR            | UI                                     | N                      | UI                     | %     | ASR            | UI                                   | N                  | UI                     | %     | ASR            | UI             |
| Northern Africa | F   | 20                        | 60             | 1,136,700              | (1,041,200, 1,240,800) | 700,300                    | (641,500, 764,400)     | 62    | 3,800          | (3,500, 4,100)                         | 452,500                | (414,500, 494,000)     | 65    | 2,300          | (2,100, 2,500)                       | 247,800            | (227,000, 270,500)     | 35    | 1,500          | (1,300, 1,600) |
|                 |     | 40                        | 40             | 1,136,700              | (1,041,200, 1,240,800) | 700,300                    | (641,500, 764,400)     | 62    | 3,800          | (3,500, 4,100)                         | 367,100                | (336,200, 400,700)     | 52    | 1,900          | (1,700, 2,100)                       | 333,200            | (305,200, 363,700)     | 48    | 1,900          | (1,700, 2,100) |
|                 |     | 30                        | 50             | 1,571,900              | (1,465,500, 1,686,000) | 1,157,700                  | (1,079,300, 1,241,700) | 74    | 5,500          | (5,200, 6,000)                         | 763,500                | (711,800, 818,900)     | 66    | 3,700          | (3,500, 4,000)                       | 394,200            | (367,500, 422,800)     | 34    | 1,800          | (1,700, 2,000) |
|                 |     | 20                        | 60             | 1,571,900              | (1,465,500, 1,686,000) | 1,157,700                  | (1,079,300, 1,241,700) | 74    | 5,500          | (5,200, 6,000)                         | 817,600                | (762,200, 876,900)     | 71    | 4,000          | (3,700, 4,300)                       | 340,100            | (317,100, 364,800)     | 29    | 1,600          | (1,500, 1,700) |
|                 |     | 40                        | 40             | 1,571,900              | (1,465,500, 1,686,000) | 1,157,700                  | (1,079,300, 1,241,700) | 74    | 5,500          | (5,200, 6,000)                         | 724,600                | (675,500, 777,200)     | 63    | 3,500          | (3,300, 3,800)                       | 433,100            | (403,800, 464,600)     | 37    | 2,000          | (1,900, 2,200) |
|                 |     | 30                        | 50             | 5,807,900              | (5,646,900, 5,973,500) | 4,189,300                  | (4,073,200, 4,308,700) | 72    | 4,900          | (4,700, 5,000)                         | 2,653,900              | (2,580,300, 2,729,600) | 63    | 3,100          | (3,000, 3,200)                       | 1,535,400          | (1,492,800, 1,579,100) | 37    | 1,800          | (1,700, 1,800) |
|                 | B   | 20                        | 60             | 5,807,900              | (5,646,900, 5,973,500) | 4,189,300                  | (4,073,200, 4,308,700) | 72    | 4,900          | (4,700, 5,000)                         | 2,940,800              | (2,859,300, 3,024,600) | 70    | 3,400          | (3,300, 3,500)                       | 1,248,500          | (1,213,900, 1,284,100) | 30    | 1,400          | (1,400, 1,500) |
|                 |     | 40                        | 40             | 5,807,900              | (5,646,900, 5,973,500) | 4,189,300                  | (4,073,200, 4,308,700) | 72    | 4,900          | (4,700, 5,000)                         | 2,500,600              | (2,431,300, 2,571,900) | 60    | 2,900          | (2,800, 3,000)                       | 1,688,700          | (1,641,900, 1,736,800) | 40    | 1,900          | (1,900, 2,000) |
|                 |     | 30                        | 50             | 3,097,700              | (2,972,900, 3,227,800) | 2,209,100                  | (2,120,100, 2,301,900) | 71    | 5,300          | (5,100, 5,500)                         | 1,513,300              | (1,452,300, 1,576,800) | 69    | 3,600          | (3,500, 3,800)                       | 695,800            | (667,800, 725,100)     | 31    | 1,600          | (1,600, 1,700) |
|                 | M   | 20                        | 60             | 3,097,700              | (2,972,900, 3,227,800) | 2,209,100                  | (2,120,100, 2,301,900) | 71    | 5,300          | (5,100, 5,500)                         | 1,675,000              | (1,607,500, 1,745,300) | 76    | 4,000          | (3,900, 4,200)                       | 534,100            | (512,600, 556,600)     | 24    | 1,300          | (1,200, 1,300) |
|                 |     | 40                        | 40             | 3,097,700              | (2,972,900, 3,227,800) | 2,209,100                  | (2,120,100, 2,301,900) | 71    | 5,300          | (5,100, 5,500)                         | 1,459,900              | (1,401,000, 1,521,200) | 66    | 3,500          | (3,400, 3,700)                       | 749,300            | (719,100, 780,700)     | 34    | 1,800          | (1,700, 1,800) |
|                 |     | 30                        | 50             | 2,710,200              | (2,607,800, 2,816,500) | 1,980,100                  | (1,905,400, 2,057,800) | 73    | 4,500          | (4,300, 4,600)                         | 1,140,600              | (1,097,500, 1,185,400) | 58    | 2,600          | (2,500, 2,700)                       | 839,500            | (807,800, 872,500)     | 42    | 1,900          | (1,800, 1,900) |
| F               | 20  | 60                        | 2,710,200      | (2,607,800, 2,816,500) | 1,980,100              | (1,905,400, 2,057,800)     | 73                     | 4,500 | (4,300, 4,600) | 1,265,800                              | (1,218,000, 1,315,500) | 64                     | 2,900 | (2,800, 3,000) | 714,300                              | (687,300, 742,300) | 36                     | 1,600 | (1,500, 1,600) |                |
|                 | 40  | 40                        | 2,710,200      | (2,607,800, 2,816,500) | 1,980,100              | (1,905,400, 2,057,800)     | 73                     | 4,500 | (4,300, 4,600) | 1,040,700                              | (1,001,400, 1,081,600) | 53                     | 2,400 | (2,300, 2,500) | 939,400                              | (903,900, 976,300) | 47                     | 2,100 | (2,000, 2,200) |                |
|                 | 30  | 50                        | 1,993,900      | (1,970,900, 2,017,000) | 1,520,500              | (1,503,000, 1,538,200)     | 76                     | 6,200 | (6,100, 6,300) | 1,012,100                              | (1,000,400, 1,023,800) | 67                     | 4,100 | (4,100, 4,200) | 508,500                              | (502,600, 514,400) | 33                     | 2,100 | (2,100, 2,100) |                |
| Southern Africa | B   | 20                        | 60             | 1,993,900              | (1,970,900, 2,017,000) | 1,520,500                  | (1,503,000, 1,538,200) | 76    | 6,200          | (6,100, 6,300)                         | 1,078,800              | (1,066,400, 1,091,400) | 71    | 4,400          | (4,300, 4,400)                       | 441,700            | (436,600, 446,800)     | 29    | 1,800          | (1,800, 1,800) |

| World Region   | Sex | Classification Thresholds |                | Total YLL              |                        | Premature cancer mortality |                        |       |                | Premature preventable cancer mortality |                        |                        |       |                | Premature treatable cancer mortality |                        |                        |       |                |                |
|----------------|-----|---------------------------|----------------|------------------------|------------------------|----------------------------|------------------------|-------|----------------|----------------------------------------|------------------------|------------------------|-------|----------------|--------------------------------------|------------------------|------------------------|-------|----------------|----------------|
|                |     | PAF (%)                   | Rel. Surv. (%) | N                      | UI                     | N                          | UI                     | %     | ASR            | UI                                     | N                      | UI                     | %     | ASR            | UI                                   | N                      | UI                     | %     | ASR            | UI             |
| Western Africa | M   | 40                        | 40             | 1,993,900              | (1,970,900, 2,017,000) | 1,520,500                  | (1,503,000, 1,538,200) | 76    | 6,200          | (6,100, 6,300)                         | 965,600                | (954,500, 976,900)     | 64    | 3,900          | (3,900, 4,000)                       | 554,900                | (548,500, 561,300)     | 36    | 2,300          | (2,300, 2,300) |
|                |     | 30                        | 50             | 913,500                | (898,700, 928,600)     | 680,900                    | (669,800, 692,100)     | 75    | 6,300          | (6,200, 6,400)                         | 429,700                | (422,700, 436,800)     | 63    | 3,900          | (3,900, 4,000)                       | 251,100                | (247,100, 255,300)     | 37    | 2,300          | (2,300, 2,400) |
|                |     | 20                        | 60             | 913,500                | (898,700, 928,600)     | 680,900                    | (669,800, 692,100)     | 75    | 6,300          | (6,200, 6,400)                         | 468,400                | (460,800, 476,100)     | 69    | 4,300          | (4,200, 4,300)                       | 212,400                | (209,000, 216,000)     | 31    | 2,000          | (2,000, 2,000) |
|                |     | 40                        | 40             | 913,500                | (898,700, 928,600)     | 680,900                    | (669,800, 692,100)     | 75    | 6,300          | (6,200, 6,400)                         | 412,300                | (405,600, 419,100)     | 61    | 3,800          | (3,700, 3,800)                       | 268,500                | (264,200, 273,000)     | 39    | 2,500          | (2,500, 2,500) |
|                |     | 30                        | 50             | 1,080,300              | (1,063,200, 1,097,700) | 839,700                    | (826,300, 853,200)     | 78    | 6,300          | (6,200, 6,400)                         | 582,300                | (573,100, 591,700)     | 69    | 4,400          | (4,300, 4,400)                       | 257,300                | (253,200, 261,500)     | 31    | 1,900          | (1,900, 2,000) |
|                |     | 20                        | 60             | 1,080,300              | (1,063,200, 1,097,700) | 839,700                    | (826,300, 853,200)     | 78    | 6,300          | (6,200, 6,400)                         | 610,400                | (600,700, 620,300)     | 73    | 4,600          | (4,500, 4,700)                       | 229,200                | (225,600, 232,900)     | 27    | 1,700          | (1,700, 1,800) |
|                | F   | 40                        | 40             | 1,080,300              | (1,063,200, 1,097,700) | 839,700                    | (826,300, 853,200)     | 78    | 6,300          | (6,200, 6,400)                         | 553,300                | (544,600, 562,200)     | 66    | 4,100          | (4,100, 4,200)                       | 286,300                | (281,800, 290,900)     | 34    | 2,200          | (2,100, 2,200) |
|                |     | 30                        | 50             | 6,177,600              | (5,795,700, 6,584,600) | 4,397,600                  | (4,125,800, 4,687,400) | 71    | 4,700          | (4,400, 5,000)                         | 2,559,900              | (2,401,600, 2,728,500) | 58    | 2,700          | (2,500, 2,900)                       | 1,837,800              | (1,724,200, 1,958,900) | 42    | 2,000          | (1,800, 2,100) |
|                |     | 20                        | 60             | 6,177,600              | (5,795,700, 6,584,600) | 4,397,600                  | (4,125,800, 4,687,400) | 71    | 4,700          | (4,400, 5,000)                         | 2,864,800              | (2,687,800, 3,053,600) | 65    | 3,000          | (2,800, 3,200)                       | 1,532,800              | (1,438,000, 1,633,800) | 35    | 1,700          | (1,600, 1,800) |
|                |     | 40                        | 40             | 6,177,600              | (5,795,700, 6,584,600) | 4,397,600                  | (4,125,800, 4,687,400) | 71    | 4,700          | (4,400, 5,000)                         | 2,409,400              | (2,260,500, 2,568,100) | 55    | 2,500          | (2,400, 2,700)                       | 1,988,200              | (1,865,300, 2,119,200) | 45    | 2,100          | (2,000, 2,300) |
|                |     | 30                        | 50             | 2,548,800              | (2,305,900, 2,817,300) | 1,645,900                  | (1,489,100, 1,819,300) | 65    | 3,700          | (3,400, 4,100)                         | 849,000                | (768,100, 938,400)     | 52    | 1,900          | (1,700, 2,100)                       | 796,900                | (721,000, 880,800)     | 48    | 1,900          | (1,700, 2,000) |
|                |     | 20                        | 60             | 2,548,800              | (2,305,900, 2,817,300) | 1,645,900                  | (1,489,100, 1,819,300) | 65    | 3,700          | (3,400, 4,100)                         | 1,009,700              | (913,500, 1,116,100)   | 61    | 2,200          | (2,000, 2,400)                       | 636,200                | (575,600, 703,200)     | 39    | 1,500          | (1,400, 1,700) |
| M              | 40  | 40                        | 2,548,800      | (2,305,900, 2,817,300) | 1,645,900              | (1,489,100, 1,819,300)     | 65                     | 3,700 | (3,400, 4,100) | 810,600                                | (733,400, 896,000)     | 49                     | 1,800 | (1,600, 2,000) | 835,300                              | (755,700, 923,300)     | 51                     | 1,900 | (1,800, 2,100) |                |
|                | 30  | 50                        | 3,628,800      | (3,340,500, 3,941,900) | 2,751,700              | (2,533,100, 2,989,200)     | 76                     | 5,600 | (5,100, 6,000) | 1,710,800                              | (1,574,900, 1,858,500) | 62                     | 3,500 | (3,200, 3,800) | 1,040,900                            | (958,200, 1,130,700)   | 38                     | 2,100 | (1,900, 2,300) |                |
|                | 20  | 60                        | 3,628,800      | (3,340,500, 3,941,900) | 2,751,700              | (2,533,100, 2,989,200)     | 76                     | 5,600 | (5,100, 6,000) | 1,855,100                              | (1,707,700, 2,015,200) | 67                     | 3,800 | (3,500, 4,100) | 896,600                              | (825,400, 974,000)     | 33                     | 1,800 | (1,700, 2,000) |                |
|                | 40  | 40                        | 3,628,800      | (3,340,500, 3,941,900) | 2,751,700              | (2,533,100, 2,989,200)     | 76                     | 5,600 | (5,100, 6,000) | 1,598,800                              | (1,471,800, 1,736,800) | 58                     | 3,200 | (3,000, 3,500) | 1,152,900                            | (1,061,300, 1,252,400) | 42                     | 2,300 | (2,100, 2,500) |                |

| World Region | Sex             | Classification Thresholds |                | Total YLL              |                        | Premature cancer mortality |                      |                        |                | Premature preventable cancer mortality |                    |                    |                        |                | Premature treatable cancer mortality |                    |                    |                        |                |                |                |
|--------------|-----------------|---------------------------|----------------|------------------------|------------------------|----------------------------|----------------------|------------------------|----------------|----------------------------------------|--------------------|--------------------|------------------------|----------------|--------------------------------------|--------------------|--------------------|------------------------|----------------|----------------|----------------|
|              |                 | PAF (%)                   | Rel. Surv. (%) | N                      | UI                     | N                          | UI                   | %                      | ASR            | UI                                     | N                  | UI                 | %                      | ASR            | UI                                   | N                  | UI                 | %                      | ASR            | UI             |                |
| Caribbean    | B               | 30                        | 50             | 1,587,300              | (1,551,200, 1,624,300) | 1,000,800                  | (978,000, 1,024,100) | 63                     | 4,900          | (4,800, 5,100)                         | 605,700            | (591,900, 619,800) | 61                     | 3,000          | (2,900, 3,100)                       | 395,100            | (386,100, 404,300) | 39                     | 2,000          | (1,900, 2,000) |                |
|              |                 | 20                        | 60             | 1,587,300              | (1,551,200, 1,624,300) | 1,000,800                  | (978,000, 1,024,100) | 63                     | 4,900          | (4,800, 5,100)                         | 669,400            | (654,100, 685,000) | 67                     | 3,300          | (3,200, 3,400)                       | 331,400            | (323,800, 339,100) | 33                     | 1,600          | (1,600, 1,700) |                |
|              |                 | 40                        | 40             | 1,587,300              | (1,551,200, 1,624,300) | 1,000,800                  | (978,000, 1,024,100) | 63                     | 4,900          | (4,800, 5,100)                         | 559,200            | (546,500, 572,200) | 56                     | 2,800          | (2,700, 2,800)                       | 441,500            | (431,500, 451,800) | 44                     | 2,200          | (2,100, 2,200) |                |
|              | M               | 30                        | 50             | 824,600                | (800,000, 850,000)     | 481,400                    | (467,000, 496,200)   | 58                     | 4,900          | (4,800, 5,100)                         | 284,700            | (276,200, 293,500) | 59                     | 2,900          | (2,800, 3,000)                       | 196,700            | (190,800, 202,700) | 41                     | 2,000          | (2,000, 2,100) |                |
|              |                 | 20                        | 60             | 824,600                | (800,000, 850,000)     | 481,400                    | (467,000, 496,200)   | 58                     | 4,900          | (4,800, 5,100)                         | 319,100            | (309,600, 328,900) | 66                     | 3,300          | (3,200, 3,400)                       | 162,300            | (157,400, 167,300) | 34                     | 1,700          | (1,600, 1,700) |                |
|              |                 | 40                        | 40             | 824,600                | (800,000, 850,000)     | 481,400                    | (467,000, 496,200)   | 58                     | 4,900          | (4,800, 5,100)                         | 268,600            | (260,600, 276,900) | 56                     | 2,800          | (2,700, 2,800)                       | 212,800            | (206,400, 219,300) | 44                     | 2,200          | (2,100, 2,300) |                |
|              | F               | 30                        | 50             | 762,700                | (736,600, 789,700)     | 519,400                    | (501,600, 537,800)   | 68                     | 5,000          | (4,800, 5,100)                         | 320,900            | (309,900, 332,300) | 62                     | 3,100          | (3,000, 3,200)                       | 198,500            | (191,700, 205,500) | 38                     | 1,900          | (1,800, 2,000) |                |
|              |                 | 20                        | 60             | 762,700                | (736,600, 789,700)     | 519,400                    | (501,600, 537,800)   | 68                     | 5,000          | (4,800, 5,100)                         | 350,300            | (338,300, 362,700) | 67                     | 3,300          | (3,200, 3,500)                       | 169,100            | (163,300, 175,100) | 33                     | 1,600          | (1,600, 1,700) |                |
|              |                 | 40                        | 40             | 762,700                | (736,600, 789,700)     | 519,400                    | (501,600, 537,800)   | 68                     | 5,000          | (4,800, 5,100)                         | 290,600            | (280,700, 300,900) | 56                     | 2,800          | (2,700, 2,900)                       | 228,800            | (220,900, 236,900) | 44                     | 2,200          | (2,100, 2,300) |                |
|              | Central America | B                         | 30             | 50                     | 3,621,500              | (3,588,400, 3,655,000)     | 2,349,400            | (2,327,900, 2,371,100) | 65             | 3,300                                  | (3,300, 3,400)     | 1,369,200          | (1,356,600, 1,381,800) | 58             | 1,900                                | (1,900, 2,000)     | 980,200            | (971,300, 989,300)     | 42             | 1,400          | (1,400, 1,400) |
|              |                 |                           | 20             | 60                     | 3,621,500              | (3,588,400, 3,655,000)     | 2,349,400            | (2,327,900, 2,371,100) | 65             | 3,300                                  | (3,300, 3,400)     | 1,572,800          | (1,558,400, 1,587,300) | 67             | 2,200                                | (2,200, 2,200)     | 776,600            | (769,500, 783,800)     | 33             | 1,100          | (1,100, 1,100) |
|              |                 |                           | 40             | 40                     | 3,621,500              | (3,588,400, 3,655,000)     | 2,349,400            | (2,327,900, 2,371,100) | 65             | 3,300                                  | (3,300, 3,400)     | 1,211,700          | (1,200,700, 1,222,900) | 52             | 1,700                                | (1,700, 1,700)     | 1,137,700          | (1,127,200, 1,148,200) | 48             | 1,600          | (1,600, 1,600) |
| M            |                 | 30                        | 50             | 1,687,500              | (1,665,500, 1,709,800) | 978,600                    | (965,800, 991,500)   | 58                     | 3,000          | (3,000, 3,000)                         | 529,500            | (522,600, 536,500) | 54                     | 1,600          | (1,600, 1,700)                       | 449,100            | (443,300, 455,100) | 46                     | 1,400          | (1,300, 1,400) |                |
|              |                 | 20                        | 60             | 1,687,500              | (1,665,500, 1,709,800) | 978,600                    | (965,800, 991,500)   | 58                     | 3,000          | (3,000, 3,000)                         | 634,600            | (626,300, 643,000) | 65                     | 1,900          | (1,900, 2,000)                       | 344,000            | (339,500, 348,600) | 35                     | 1,100          | (1,000, 1,100) |                |
|              |                 | 40                        | 40             | 1,687,500              | (1,665,500, 1,709,800) | 978,600                    | (965,800, 991,500)   | 58                     | 3,000          | (3,000, 3,000)                         | 476,000            | (469,800, 482,300) | 49                     | 1,500          | (1,500, 1,500)                       | 502,700            | (496,100, 509,300) | 51                     | 1,500          | (1,500, 1,500) |                |
| F            | 30              | 50                        | 1,934,000      | (1,909,000, 1,959,300) | 1,370,800              | (1,353,100, 1,388,800)     | 71                   | 3,600                  | (3,600, 3,700) | 839,700                                | (828,800, 850,700) | 61                 | 2,200                  | (2,200, 2,300) | 531,100                              | (524,200, 538,100) | 39                 | 1,400                  | (1,400, 1,400) |                |                |

| World Region     | Sex | Classification Thresholds |                | Total YLL  |                          | Premature cancer mortality |                        |    |       |                | Premature preventable cancer mortality |                        |    |       |                | Premature treatable cancer mortality |                        |    |       |                |
|------------------|-----|---------------------------|----------------|------------|--------------------------|----------------------------|------------------------|----|-------|----------------|----------------------------------------|------------------------|----|-------|----------------|--------------------------------------|------------------------|----|-------|----------------|
|                  |     | PAF (%)                   | Rel. Surv. (%) | N          | UI                       | N                          | UI                     | %  | ASR   | UI             | N                                      | UI                     | %  | ASR   | UI             | N                                    | UI                     | %  | ASR   | UI             |
| South America    | B   | 20                        | 60             | 1,934,000  | (1,909,000, 1,959,300)   | 1,370,800                  | (1,353,100, 1,388,800) | 71 | 3,600 | (3,600, 3,700) | 938,200                                | (926,100, 950,500)     | 68 | 2,500 | (2,400, 2,500) | 432,600                              | (427,000, 438,300)     | 32 | 1,100 | (1,100, 1,200) |
|                  |     | 40                        | 40             | 1,934,000  | (1,909,000, 1,959,300)   | 1,370,800                  | (1,353,100, 1,388,800) | 71 | 3,600 | (3,600, 3,700) | 735,800                                | (726,300, 745,400)     | 54 | 1,900 | (1,900, 2,000) | 635,000                              | (626,800, 643,300)     | 46 | 1,700 | (1,700, 1,700) |
|                  |     | 30                        | 50             | 13,590,900 | (13,505,700, 13,676,600) | 8,958,800                  | (8,902,700, 9,015,300) | 66 | 4,500 | (4,500, 4,600) | 5,367,400                              | (5,333,700, 5,401,200) | 60 | 2,700 | (2,700, 2,700) | 3,591,400                            | (3,568,900, 3,614,100) | 40 | 1,800 | (1,800, 1,800) |
|                  |     | 20                        | 60             | 13,590,900 | (13,505,700, 13,676,600) | 8,958,800                  | (8,902,700, 9,015,300) | 66 | 4,500 | (4,500, 4,600) | 6,008,100                              | (5,970,400, 6,045,900) | 67 | 3,000 | (3,000, 3,100) | 2,950,800                            | (2,932,300, 2,969,400) | 33 | 1,500 | (1,500, 1,500) |
|                  |     | 40                        | 40             | 13,590,900 | (13,505,700, 13,676,600) | 8,958,800                  | (8,902,700, 9,015,300) | 66 | 4,500 | (4,500, 4,600) | 4,886,600                              | (4,856,000, 4,917,400) | 55 | 2,500 | (2,500, 2,500) | 4,072,200                            | (4,046,700, 4,097,900) | 45 | 2,100 | (2,000, 2,100) |
|                  |     | 30                        | 50             | 6,787,700  | (6,729,100, 6,846,800)   | 4,272,300                  | (4,235,400, 4,309,500) | 63 | 4,600 | (4,500, 4,600) | 2,463,200                              | (2,441,900, 2,484,700) | 58 | 2,600 | (2,600, 2,700) | 1,809,100                            | (1,793,400, 1,824,800) | 42 | 1,900 | (1,900, 1,900) |
|                  | M   | 20                        | 60             | 6,787,700  | (6,729,100, 6,846,800)   | 4,272,300                  | (4,235,400, 4,309,500) | 63 | 4,600 | (4,500, 4,600) | 2,827,400                              | (2,802,900, 2,852,000) | 66 | 3,000 | (3,000, 3,000) | 1,444,900                            | (1,432,400, 1,457,500) | 34 | 1,500 | (1,500, 1,500) |
|                  |     | 40                        | 40             | 6,787,700  | (6,729,100, 6,846,800)   | 4,272,300                  | (4,235,400, 4,309,500) | 63 | 4,600 | (4,500, 4,600) | 2,278,600                              | (2,258,900, 2,298,500) | 53 | 2,400 | (2,400, 2,500) | 1,993,600                            | (1,976,400, 2,011,000) | 47 | 2,100 | (2,100, 2,100) |
|                  |     | 30                        | 50             | 6,803,100  | (6,740,700, 6,866,100)   | 4,686,600                  | (4,643,600, 4,730,000) | 69 | 4,500 | (4,500, 4,600) | 2,904,200                              | (2,877,500, 2,931,100) | 62 | 2,800 | (2,800, 2,800) | 1,782,400                            | (1,766,000, 1,798,900) | 38 | 1,700 | (1,700, 1,700) |
|                  |     | 20                        | 60             | 6,803,100  | (6,740,700, 6,866,100)   | 4,686,600                  | (4,643,600, 4,730,000) | 69 | 4,500 | (4,500, 4,600) | 3,180,700                              | (3,151,500, 3,210,200) | 68 | 3,100 | (3,100, 3,100) | 1,505,900                            | (1,492,000, 1,519,800) | 32 | 1,500 | (1,400, 1,500) |
|                  |     | 40                        | 40             | 6,803,100  | (6,740,700, 6,866,100)   | 4,686,600                  | (4,643,600, 4,730,000) | 69 | 4,500 | (4,500, 4,600) | 2,608,000                              | (2,584,100, 2,632,100) | 56 | 2,500 | (2,500, 2,600) | 2,078,600                            | (2,059,500, 2,097,800) | 44 | 2,000 | (2,000, 2,000) |
|                  |     | 30                        | 50             | 15,262,000 | (15,213,900, 15,310,200) | 8,938,100                  | (8,909,900, 8,966,300) | 59 | 4,100 | (4,100, 4,100) | 5,666,100                              | (5,648,300, 5,684,000) | 63 | 2,600 | (2,600, 2,600) | 3,271,900                            | (3,261,600, 3,282,300) | 37 | 1,500 | (1,500, 1,500) |
| Northern America | B   | 20                        | 60             | 15,262,000 | (15,213,900, 15,310,200) | 8,938,100                  | (8,909,900, 8,966,300) | 59 | 4,100 | (4,100, 4,100) | 6,173,900                              | (6,154,400, 6,193,400) | 69 | 2,800 | (2,800, 2,800) | 2,764,200                            | (2,755,500, 2,772,900) | 31 | 1,300 | (1,300, 1,300) |
|                  |     | 40                        | 40             | 15,262,000 | (15,213,900, 15,310,200) | 8,938,100                  | (8,909,900, 8,966,300) | 59 | 4,100 | (4,100, 4,100) | 5,011,700                              | (4,995,900, 5,027,500) | 56 | 2,300 | (2,300, 2,300) | 3,926,400                            | (3,914,000, 3,938,800) | 44 | 1,800 | (1,800, 1,800) |
|                  | M   | 30                        | 50             | 8,029,300  | (7,994,500, 8,064,200)   | 4,654,800                  | (4,634,600, 4,675,100) | 58 | 4,300 | (4,300, 4,300) | 2,962,700                              | (2,949,900, 2,975,600) | 64 | 2,700 | (2,700, 2,700) | 1,692,100                            | (1,684,700, 1,699,400) | 36 | 1,600 | (1,600, 1,600) |
|                  |     | 20                        | 60             | 8,029,300  | (7,994,500, 8,064,200)   | 4,654,800                  | (4,634,600, 4,675,100) | 58 | 4,300 | (4,300, 4,300) | 3,257,400                              | (3,243,300, 3,271,600) | 70 | 3,000 | (3,000, 3,000) | 1,397,400                            | (1,391,300, 1,403,400) | 30 | 1,300 | (1,300, 1,300) |

| World Region       | Sex | Classification Thresholds |                | Total YLL                |                          | Premature cancer mortality |                          |       |                | Premature preventable cancer mortality |                          |                          |       |                | Premature treatable cancer mortality |                        |                          |       |                |                |
|--------------------|-----|---------------------------|----------------|--------------------------|--------------------------|----------------------------|--------------------------|-------|----------------|----------------------------------------|--------------------------|--------------------------|-------|----------------|--------------------------------------|------------------------|--------------------------|-------|----------------|----------------|
|                    |     | PAF (%)                   | Rel. Surv. (%) | N                        | UI                       | N                          | UI                       | %     | ASR            | UI                                     | N                        | UI                       | %     | ASR            | UI                                   | N                      | UI                       | %     | ASR            | UI             |
| Eastern Asia       | F   | 40                        | 40             | 8,029,300                | (7,994,500, 8,064,200)   | 4,654,800                  | (4,634,600, 4,675,100)   | 58    | 4,300          | (4,300, 4,300)                         | 2,691,100                | (2,679,500, 2,702,800)   | 58    | 2,400          | (2,400, 2,500)                       | 1,963,700              | (1,955,200, 1,972,200)   | 42    | 1,800          | (1,800, 1,800) |
|                    |     | 30                        | 50             | 7,232,700                | (7,199,200, 7,266,300)   | 4,283,200                  | (4,263,400, 4,303,200)   | 59    | 3,900          | (3,900, 4,000)                         | 2,703,400                | (2,690,900, 2,716,000)   | 63    | 2,500          | (2,400, 2,500)                       | 1,579,900              | (1,572,500, 1,587,200)   | 37    | 1,500          | (1,500, 1,500) |
|                    |     | 20                        | 60             | 7,232,700                | (7,199,200, 7,266,300)   | 4,283,200                  | (4,263,400, 4,303,200)   | 59    | 3,900          | (3,900, 4,000)                         | 2,916,400                | (2,902,900, 2,930,000)   | 68    | 2,700          | (2,600, 2,700)                       | 1,366,800              | (1,360,500, 1,373,200)   | 32    | 1,300          | (1,300, 1,300) |
|                    |     | 40                        | 40             | 7,232,700                | (7,199,200, 7,266,300)   | 4,283,200                  | (4,263,400, 4,303,200)   | 59    | 3,900          | (3,900, 4,000)                         | 2,320,600                | (2,309,800, 2,331,400)   | 54    | 2,100          | (2,100, 2,100)                       | 1,962,700              | (1,953,600, 1,971,800)   | 46    | 1,800          | (1,800, 1,800) |
|                    | B   | 30                        | 50             | 92,017,700               | (91,750,200, 92,285,900) | 64,028,500                 | (63,842,400, 64,215,100) | 70    | 6,200          | (6,200, 6,200)                         | 50,040,300               | (49,894,900, 50,186,200) | 78    | 4,800          | (4,800, 4,800)                       | 13,988,100             | (13,947,500, 14,028,900) | 22    | 1,400          | (1,400, 1,400) |
|                    |     | 20                        | 60             | 92,017,700               | (91,750,200, 92,285,900) | 64,028,500                 | (63,842,400, 64,215,100) | 70    | 6,200          | (6,200, 6,200)                         | 52,588,800               | (52,436,000, 52,742,100) | 82    | 5,100          | (5,100, 5,100)                       | 11,439,600             | (11,406,400, 11,473,000) | 18    | 1,100          | (1,100, 1,100) |
|                    |     | 40                        | 40             | 92,017,700               | (91,750,200, 92,285,900) | 64,028,500                 | (63,842,400, 64,215,100) | 70    | 6,200          | (6,200, 6,200)                         | 47,570,100               | (47,431,900, 47,708,800) | 74    | 4,600          | (4,600, 4,600)                       | 16,458,300             | (16,410,500, 16,506,300) | 26    | 1,600          | (1,600, 1,600) |
|                    | M   | 30                        | 50             | 56,124,000               | (55,905,100, 56,343,800) | 39,611,400                 | (39,456,900, 39,766,600) | 71    | 7,600          | (7,600, 7,700)                         | 32,589,100               | (32,461,900, 32,716,700) | 82    | 6,300          | (6,200, 6,300)                       | 7,022,400              | (6,995,000, 7,049,900)   | 18    | 1,400          | (1,400, 1,400) |
|                    |     | 20                        | 60             | 56,124,000               | (55,905,100, 56,343,800) | 39,611,400                 | (39,456,900, 39,766,600) | 71    | 7,600          | (7,600, 7,700)                         | 34,031,100               | (33,898,300, 34,164,300) | 86    | 6,500          | (6,500, 6,600)                       | 5,580,400              | (5,558,600, 5,602,200)   | 14    | 1,100          | (1,100, 1,100) |
|                    |     | 40                        | 40             | 56,124,000               | (55,905,100, 56,343,800) | 39,611,400                 | (39,456,900, 39,766,600) | 71    | 7,600          | (7,600, 7,700)                         | 31,486,500               | (31,363,600, 31,609,800) | 79    | 6,100          | (6,000, 6,100)                       | 8,124,900              | (8,093,300, 8,156,800)   | 21    | 1,600          | (1,600, 1,600) |
|                    |     | 30                        | 50             | 35,893,600               | (35,735,600, 36,052,400) | 24,417,000                 | (24,309,500, 24,525,000) | 68    | 4,800          | (4,800, 4,800)                         | 17,451,300               | (17,374,400, 17,528,500) | 71    | 3,400          | (3,400, 3,400)                       | 6,965,800              | (6,935,100, 6,996,600)   | 29    | 1,400          | (1,400, 1,400) |
|                    | F   | 20                        | 60             | 35,893,600               | (35,735,600, 36,052,400) | 24,417,000                 | (24,309,500, 24,525,000) | 68    | 4,800          | (4,800, 4,800)                         | 18,557,800               | (18,476,000, 18,639,800) | 76    | 3,600          | (3,600, 3,600)                       | 5,859,300              | (5,833,500, 5,885,200)   | 24    | 1,200          | (1,200, 1,200) |
| 40                 |     | 40                        | 35,893,600     | (35,735,600, 36,052,400) | 24,417,000               | (24,309,500, 24,525,000)   | 68                       | 4,800 | (4,800, 4,800) | 16,083,600                             | (16,012,800, 16,154,800) | 66                       | 3,100 | (3,100, 3,100) | 8,333,400                            | (8,296,700, 8,370,200) | 34                       | 1,600 | (1,600, 1,700) |                |
| South Central Asia | B   | 30                        | 50             | 41,955,200               | (41,457,400, 42,458,900) | 32,226,700                 | (31,844,300, 32,613,600) | 77    | 4,100          | (4,100, 4,200)                         | 19,479,600               | (19,248,500, 19,713,500) | 60    | 2,500          | (2,500, 2,600)                       | 12,747,000             | (12,595,800, 12,900,100) | 40    | 1,600          | (1,600, 1,600) |
|                    |     | 20                        | 60             | 41,955,200               | (41,457,400, 42,458,900) | 32,226,700                 | (31,844,300, 32,613,600) | 77    | 4,100          | (4,100, 4,200)                         | 21,946,500               | (21,686,100, 22,210,000) | 68    | 2,800          | (2,800, 2,900)                       | 10,280,200             | (10,158,200, 10,403,600) | 32    | 1,300          | (1,300, 1,300) |
|                    |     | 40                        | 40             | 41,955,200               | (41,457,400, 42,458,900) | 32,226,700                 | (31,844,300, 32,613,600) | 77    | 4,100          | (4,100, 4,200)                         | 18,402,000               | (18,183,600, 18,622,900) | 57    | 2,400          | (2,400, 2,400)                       | 13,824,700             | (13,660,700, 13,990,700) | 43    | 1,800          | (1,700, 1,800) |

| World Region       | Sex | Classification Thresholds |                | Total YLL                |                          | Premature cancer mortality |                          |       |                | Premature preventable cancer mortality |                        |                          |       |                | Premature treatable cancer mortality |                        |                        |       |                |                |
|--------------------|-----|---------------------------|----------------|--------------------------|--------------------------|----------------------------|--------------------------|-------|----------------|----------------------------------------|------------------------|--------------------------|-------|----------------|--------------------------------------|------------------------|------------------------|-------|----------------|----------------|
|                    |     | PAF (%)                   | Rel. Surv. (%) | N                        | UI                       | N                          | UI                       | %     | ASR            | UI                                     | N                      | UI                       | %     | ASR            | UI                                   | N                      | UI                     | %     | ASR            | UI             |
| South-Eastern Asia | M   | 30                        | 50             | 21,771,500               | (21,409,300, 22,139,800) | 16,374,200                 | (16,101,800, 16,651,200) | 75    | 4,200          | (4,100, 4,300)                         | 9,584,300              | (9,424,900, 9,746,500)   | 59    | 2,500          | (2,400, 2,500)                       | 6,789,900              | (6,676,900, 6,904,800) | 41    | 1,700          | (1,700, 1,700) |
|                    |     | 20                        | 60             | 21,771,500               | (21,409,300, 22,139,800) | 16,374,200                 | (16,101,800, 16,651,200) | 75    | 4,200          | (4,100, 4,300)                         | 11,102,600             | (10,917,900, 11,290,400) | 68    | 2,900          | (2,800, 2,900)                       | 5,271,600              | (5,183,900, 5,360,800) | 32    | 1,300          | (1,300, 1,400) |
|                    |     | 40                        | 40             | 21,771,500               | (21,409,300, 22,139,800) | 16,374,200                 | (16,101,800, 16,651,200) | 75    | 4,200          | (4,100, 4,300)                         | 9,310,200              | (9,155,300, 9,467,700)   | 57    | 2,400          | (2,400, 2,400)                       | 7,064,000              | (6,946,500, 7,183,500) | 43    | 1,800          | (1,800, 1,800) |
|                    | F   | 30                        | 50             | 20,183,700               | (19,844,200, 20,529,000) | 15,852,400                 | (15,585,800, 16,123,700) | 79    | 4,100          | (4,000, 4,200)                         | 9,895,300              | (9,728,800, 10,064,600)  | 62    | 2,600          | (2,500, 2,600)                       | 5,957,100              | (5,856,900, 6,059,100) | 38    | 1,500          | (1,500, 1,600) |
|                    |     | 20                        | 60             | 20,183,700               | (19,844,200, 20,529,000) | 15,852,400                 | (15,585,800, 16,123,700) | 79    | 4,100          | (4,000, 4,200)                         | 10,843,900             | (10,661,500, 11,029,400) | 68    | 2,800          | (2,800, 2,900)                       | 5,008,600              | (4,924,300, 5,094,300) | 32    | 1,300          | (1,300, 1,300) |
|                    |     | 40                        | 40             | 20,183,700               | (19,844,200, 20,529,000) | 15,852,400                 | (15,585,800, 16,123,700) | 79    | 4,100          | (4,000, 4,200)                         | 9,091,700              | (8,938,800, 9,247,300)   | 57    | 2,400          | (2,300, 2,400)                       | 6,760,700              | (6,647,000, 6,876,400) | 43    | 1,700          | (1,700, 1,800) |
|                    | B   | 30                        | 50             | 20,986,500               | (20,711,200, 21,265,500) | 16,097,700                 | (15,886,600, 16,311,700) | 77    | 5,400          | (5,400, 5,500)                         | 10,533,400             | (10,395,200, 10,673,400) | 65    | 3,600          | (3,500, 3,600)                       | 5,564,400              | (5,491,400, 5,638,300) | 35    | 1,900          | (1,800, 1,900) |
|                    |     | 20                        | 60             | 20,986,500               | (20,711,200, 21,265,500) | 16,097,700                 | (15,886,600, 16,311,700) | 77    | 5,400          | (5,400, 5,500)                         | 11,697,700             | (11,544,300, 11,853,200) | 73    | 4,000          | (3,900, 4,000)                       | 4,400,000              | (4,342,300, 4,458,500) | 27    | 1,500          | (1,500, 1,500) |
|                    |     | 40                        | 40             | 20,986,500               | (20,711,200, 21,265,500) | 16,097,700                 | (15,886,600, 16,311,700) | 77    | 5,400          | (5,400, 5,500)                         | 9,964,200              | (9,833,500, 10,096,600)  | 62    | 3,400          | (3,300, 3,400)                       | 6,133,600              | (6,053,100, 6,215,100) | 38    | 2,100          | (2,000, 2,100) |
| M                  | 30  | 50                        | 11,378,200     | (11,159,300, 11,601,300) | 8,735,600                | (8,567,600, 8,906,900)     | 77                       | 6,100 | (6,000, 6,200) | 5,918,300                              | (5,804,400, 6,034,300) | 68                       | 4,100 | (4,100, 4,200) | 2,817,300                            | (2,763,200, 2,872,600) | 32                     | 2,000 | (1,900, 2,000) |                |
|                    | 20  | 60                        | 11,378,200     | (11,159,300, 11,601,300) | 8,735,600                | (8,567,600, 8,906,900)     | 77                       | 6,100 | (6,000, 6,200) | 6,610,400                              | (6,483,300, 6,740,100) | 76                       | 4,600 | (4,500, 4,700) | 2,125,200                            | (2,084,300, 2,166,900) | 24                     | 1,500 | (1,500, 1,500) |                |
|                    | 40  | 40                        | 11,378,200     | (11,159,300, 11,601,300) | 8,735,600                | (8,567,600, 8,906,900)     | 77                       | 6,100 | (6,000, 6,200) | 5,782,000                              | (5,670,800, 5,895,400) | 66                       | 4,000 | (4,000, 4,100) | 2,953,600                            | (2,896,800, 3,011,500) | 34                     | 2,000 | (2,000, 2,100) |                |
| F                  | 30  | 50                        | 9,608,300      | (9,436,900, 9,782,900)   | 7,362,100                | (7,230,800, 7,495,900)     | 77                       | 4,800 | (4,800, 4,900) | 4,615,100                              | (4,532,800, 4,699,000) | 63                       | 3,000 | (3,000, 3,100) | 2,747,000                            | (2,698,000, 2,796,900) | 37                     | 1,800 | (1,800, 1,800) |                |
|                    | 20  | 60                        | 9,608,300      | (9,436,900, 9,782,900)   | 7,362,100                | (7,230,800, 7,495,900)     | 77                       | 4,800 | (4,800, 4,900) | 5,087,300                              | (4,996,500, 5,179,700) | 69                       | 3,300 | (3,300, 3,400) | 2,274,800                            | (2,234,300, 2,316,200) | 31                     | 1,500 | (1,500, 1,500) |                |
|                    | 40  | 40                        | 9,608,300      | (9,436,900, 9,782,900)   | 7,362,100                | (7,230,800, 7,495,900)     | 77                       | 4,800 | (4,800, 4,900) | 4,182,200                              | (4,107,500, 4,258,100) | 57                       | 2,800 | (2,700, 2,800) | 3,180,000                            | (3,123,200, 3,237,700) | 43                     | 2,100 | (2,000, 2,100) |                |
| Western Asia       | B   | 30                        | 50             | 6,992,600                | (6,906,100, 7,080,300)   | 4,893,400                  | (4,832,800, 4,954,800)   | 70    | 4,800          | (4,800, 4,900)                         | 2,962,100              | (2,925,400, 2,999,300)   | 61    | 3,000          | (3,000, 3,000)                       | 1,931,300              | (1,907,400, 1,955,500) | 39    | 1,800          | (1,800, 1,900) |

| World Region   | Sex | Classification Thresholds |                | Total YLL  |                          | Premature cancer mortality |                          |    |       | Premature preventable cancer mortality |           |                        |    |       | Premature treatable cancer mortality |           |                        |    |       |                |
|----------------|-----|---------------------------|----------------|------------|--------------------------|----------------------------|--------------------------|----|-------|----------------------------------------|-----------|------------------------|----|-------|--------------------------------------|-----------|------------------------|----|-------|----------------|
|                |     | PAF (%)                   | Rel. Surv. (%) | N          | UI                       | N                          | UI                       | %  | ASR   | UI                                     | N         | UI                     | %  | ASR   | UI                                   | N         | UI                     | %  | ASR   | UI             |
| Eastern Europe | M   | 20                        | 60             | 6,992,600  | (6,906,100, 7,080,300)   | 4,893,400                  | (4,832,800, 4,954,800)   | 70 | 4,800 | (4,800, 4,900)                         | 3,363,500 | (3,321,900, 3,405,700) | 69 | 3,400 | (3,300, 3,400)                       | 1,529,900 | (1,511,000, 1,549,100) | 31 | 1,500 | (1,500, 1,500) |
|                |     | 40                        | 40             | 6,992,600  | (6,906,100, 7,080,300)   | 4,893,400                  | (4,832,800, 4,954,800)   | 70 | 4,800 | (4,800, 4,900)                         | 2,697,300 | (2,663,900, 2,731,200) | 55 | 2,700 | (2,700, 2,800)                       | 2,196,100 | (2,168,900, 2,223,600) | 45 | 2,100 | (2,100, 2,100) |
|                |     | 30                        | 50             | 3,923,700  | (3,859,100, 3,989,300)   | 2,690,900                  | (2,646,700, 2,735,900)   | 69 | 5,400 | (5,300, 5,400)                         | 1,756,800 | (1,727,900, 1,786,200) | 65 | 3,600 | (3,500, 3,700)                       | 934,100   | (918,800, 949,800)     | 35 | 1,800 | (1,700, 1,800) |
|                |     | 20                        | 60             | 3,923,700  | (3,859,100, 3,989,300)   | 2,690,900                  | (2,646,700, 2,735,900)   | 69 | 5,400 | (5,300, 5,400)                         | 1,981,700 | (1,949,100, 2,014,900) | 74 | 4,000 | (3,900, 4,100)                       | 709,200   | (697,600, 721,100)     | 26 | 1,400 | (1,300, 1,400) |
|                |     | 40                        | 40             | 3,923,700  | (3,859,100, 3,989,300)   | 2,690,900                  | (2,646,700, 2,735,900)   | 69 | 5,400 | (5,300, 5,400)                         | 1,649,000 | (1,621,800, 1,676,500) | 61 | 3,400 | (3,300, 3,400)                       | 1,042,000 | (1,024,800, 1,059,400) | 39 | 2,000 | (1,900, 2,000) |
|                |     | 30                        | 50             | 3,069,000  | (3,011,600, 3,127,500)   | 2,202,500                  | (2,161,300, 2,244,500)   | 72 | 4,400 | (4,300, 4,500)                         | 1,205,300 | (1,182,800, 1,228,300) | 55 | 2,400 | (2,400, 2,500)                       | 997,200   | (978,500, 1,016,200)   | 45 | 2,000 | (1,900, 2,000) |
|                | F   | 20                        | 60             | 3,069,000  | (3,011,600, 3,127,500)   | 2,202,500                  | (2,161,300, 2,244,500)   | 72 | 4,400 | (4,300, 4,500)                         | 1,381,800 | (1,355,900, 1,408,100) | 63 | 2,800 | (2,700, 2,800)                       | 820,700   | (805,400, 836,400)     | 37 | 1,600 | (1,600, 1,700) |
|                |     | 40                        | 40             | 3,069,000  | (3,011,600, 3,127,500)   | 2,202,500                  | (2,161,300, 2,244,500)   | 72 | 4,400 | (4,300, 4,500)                         | 1,048,400 | (1,028,800, 1,068,400) | 48 | 2,100 | (2,100, 2,100)                       | 1,154,100 | (1,132,500, 1,176,100) | 52 | 2,300 | (2,200, 2,300) |
|                |     | 30                        | 50             | 17,470,600 | (17,369,000, 17,572,700) | 12,295,800                 | (12,224,300, 12,367,700) | 70 | 6,600 | (6,600, 6,600)                         | 7,874,500 | (7,828,700, 7,920,500) | 64 | 4,200 | (4,200, 4,200)                       | 4,421,300 | (4,395,600, 4,447,100) | 36 | 2,400 | (2,400, 2,400) |
|                | B   | 20                        | 60             | 17,470,600 | (17,369,000, 17,572,700) | 12,295,800                 | (12,224,300, 12,367,700) | 70 | 6,600 | (6,600, 6,600)                         | 8,532,500 | (8,482,900, 8,582,400) | 69 | 4,600 | (4,500, 4,600)                       | 3,763,200 | (3,741,400, 3,785,200) | 31 | 2,000 | (2,000, 2,000) |
|                |     | 40                        | 40             | 17,470,600 | (17,369,000, 17,572,700) | 12,295,800                 | (12,224,300, 12,367,700) | 70 | 6,600 | (6,600, 6,600)                         | 7,041,700 | (7,000,800, 7,082,900) | 57 | 3,800 | (3,700, 3,800)                       | 5,254,100 | (5,223,500, 5,284,800) | 43 | 2,800 | (2,800, 2,900) |
|                |     | 30                        | 50             | 9,875,100  | (9,796,700, 9,954,200)   | 7,190,100                  | (7,133,000, 7,247,700)   | 73 | 8,500 | (8,500, 8,600)                         | 4,757,000 | (4,719,200, 4,795,000) | 66 | 5,600 | (5,600, 5,700)                       | 2,433,200 | (2,413,800, 2,452,600) | 34 | 2,900 | (2,900, 2,900) |
|                | M   | 20                        | 60             | 9,875,100  | (9,796,700, 9,954,200)   | 7,190,100                  | (7,133,000, 7,247,700)   | 73 | 8,500 | (8,500, 8,600)                         | 5,152,300 | (5,111,400, 5,193,600) | 72 | 6,100 | (6,000, 6,100)                       | 2,037,800 | (2,021,600, 2,054,100) | 28 | 2,400 | (2,400, 2,400) |
|                |     | 40                        | 40             | 9,875,100  | (9,796,700, 9,954,200)   | 7,190,100                  | (7,133,000, 7,247,700)   | 73 | 8,500 | (8,500, 8,600)                         | 4,404,500 | (4,369,500, 4,439,700) | 61 | 5,200 | (5,200, 5,200)                       | 2,785,700 | (2,763,500, 2,808,000) | 39 | 3,300 | (3,300, 3,400) |
|                | F   | 30                        | 50             | 7,595,400  | (7,530,800, 7,660,600)   | 5,105,600                  | (5,062,200, 5,149,400)   | 67 | 5,100 | (5,100, 5,200)                         | 3,117,500 | (3,091,000, 3,144,300) | 61 | 3,100 | (3,100, 3,200)                       | 1,988,100 | (1,971,200, 2,005,200) | 39 | 2,000 | (2,000, 2,000) |
|                |     | 20                        | 60             | 7,595,400  | (7,530,800, 7,660,600)   | 5,105,600                  | (5,062,200, 5,149,400)   | 67 | 5,100 | (5,100, 5,200)                         | 3,380,200 | (3,351,500, 3,409,200) | 66 | 3,400 | (3,400, 3,400)                       | 1,725,400 | (1,710,700, 1,740,200) | 34 | 1,700 | (1,700, 1,800) |



| World Region    | Sex | Classification Thresholds |                | Total YLL |                        | Premature cancer mortality |                        |    |       | Premature preventable cancer mortality |           |                        |    |       | Premature treatable cancer mortality |           |                        |    |       |                |
|-----------------|-----|---------------------------|----------------|-----------|------------------------|----------------------------|------------------------|----|-------|----------------------------------------|-----------|------------------------|----|-------|--------------------------------------|-----------|------------------------|----|-------|----------------|
|                 |     | PAF (%)                   | Rel. Surv. (%) | N         | UI                     | N                          | UI                     | %  | ASR   | UI                                     | N         | UI                     | %  | ASR   | UI                                   | N         | UI                     | %  | ASR   | UI             |
| Northern Europe | B   | 40                        | 40             | 7,595,400 | (7,530,800, 7,660,600) | 5,105,600                  | (5,062,200, 5,149,400) | 67 | 5,100 | (5,100, 5,200)                         | 2,637,300 | (2,614,800, 2,659,900) | 52 | 2,700 | (2,600, 2,700)                       | 2,468,400 | (2,447,400, 2,489,600) | 48 | 2,500 | (2,500, 2,500) |
|                 |     | 30                        | 50             | 5,414,800 | (5,377,000, 5,453,000) | 2,604,100                  | (2,585,900, 2,622,500) | 48 | 4,200 | (4,100, 4,200)                         | 1,626,600 | (1,615,200, 1,638,100) | 62 | 2,600 | (2,600, 2,600)                       | 977,500   | (970,700, 984,400)     | 38 | 1,600 | (1,600, 1,600) |
|                 |     | 20                        | 60             | 5,414,800 | (5,377,000, 5,453,000) | 2,604,100                  | (2,585,900, 2,622,500) | 48 | 4,200 | (4,100, 4,200)                         | 1,768,900 | (1,756,500, 1,781,300) | 68 | 2,800 | (2,800, 2,800)                       | 835,300   | (829,400, 841,100)     | 32 | 1,400 | (1,400, 1,400) |
|                 |     | 40                        | 40             | 5,414,800 | (5,377,000, 5,453,000) | 2,604,100                  | (2,585,900, 2,622,500) | 48 | 4,200 | (4,100, 4,200)                         | 1,443,400 | (1,433,300, 1,453,600) | 55 | 2,300 | (2,300, 2,300)                       | 1,160,700 | (1,152,600, 1,168,900) | 45 | 1,900 | (1,900, 1,900) |
|                 | M   | 30                        | 50             | 2,877,100 | (2,850,200, 2,904,300) | 1,354,000                  | (1,341,400, 1,366,900) | 47 | 4,400 | (4,300, 4,400)                         | 847,000   | (839,100, 855,000)     | 63 | 2,700 | (2,700, 2,700)                       | 507,000   | (502,300, 511,800)     | 37 | 1,700 | (1,600, 1,700) |
|                 |     | 20                        | 60             | 2,877,100 | (2,850,200, 2,904,300) | 1,354,000                  | (1,341,400, 1,366,900) | 47 | 4,400 | (4,300, 4,400)                         | 929,200   | (920,500, 938,000)     | 69 | 3,000 | (2,900, 3,000)                       | 424,900   | (420,900, 428,900)     | 31 | 1,400 | (1,400, 1,400) |
|                 |     | 40                        | 40             | 2,877,100 | (2,850,200, 2,904,300) | 1,354,000                  | (1,341,400, 1,366,900) | 47 | 4,400 | (4,300, 4,400)                         | 771,000   | (763,800, 778,300)     | 57 | 2,500 | (2,400, 2,500)                       | 583,000   | (577,600, 588,500)     | 43 | 1,900 | (1,900, 1,900) |
|                 |     | 30                        | 50             | 2,537,700 | (2,511,500, 2,564,200) | 1,250,100                  | (1,237,100, 1,263,100) | 49 | 4,000 | (4,000, 4,000)                         | 779,600   | (771,500, 787,700)     | 62 | 2,500 | (2,400, 2,500)                       | 470,500   | (465,600, 475,400)     | 38 | 1,500 | (1,500, 1,600) |
|                 | F   | 20                        | 60             | 2,537,700 | (2,511,500, 2,564,200) | 1,250,100                  | (1,237,100, 1,263,100) | 49 | 4,000 | (4,000, 4,000)                         | 839,700   | (831,000, 848,400)     | 67 | 2,700 | (2,600, 2,700)                       | 410,400   | (406,200, 414,700)     | 33 | 1,300 | (1,300, 1,400) |
|                 |     | 40                        | 40             | 2,537,700 | (2,511,500, 2,564,200) | 1,250,100                  | (1,237,100, 1,263,100) | 49 | 4,000 | (4,000, 4,000)                         | 672,400   | (665,400, 679,400)     | 54 | 2,100 | (2,100, 2,200)                       | 577,700   | (571,700, 583,700)     | 46 | 1,900 | (1,800, 1,900) |
|                 |     | 30                        | 50             | 8,644,800 | (8,582,300, 8,707,700) | 4,682,300                  | (4,648,500, 4,716,400) | 54 | 4,700 | (4,700, 4,700)                         | 3,049,500 | (3,027,500, 3,071,700) | 65 | 3,000 | (3,000, 3,000)                       | 1,632,800 | (1,621,000, 1,644,700) | 35 | 1,700 | (1,700, 1,700) |
|                 |     | 20                        | 60             | 8,644,800 | (8,582,300, 8,707,700) | 4,682,300                  | (4,648,500, 4,716,400) | 54 | 4,700 | (4,700, 4,700)                         | 3,308,600 | (3,284,700, 3,332,700) | 71 | 3,300 | (3,300, 3,300)                       | 1,373,700 | (1,363,800, 1,383,800) | 29 | 1,400 | (1,400, 1,400) |
| Southern Europe | B   | 40                        | 40             | 8,644,800 | (8,582,300, 8,707,700) | 4,682,300                  | (4,648,500, 4,716,400) | 54 | 4,700 | (4,700, 4,700)                         | 2,746,700 | (2,726,900, 2,766,700) | 59 | 2,700 | (2,700, 2,700)                       | 1,935,600 | (1,921,600, 1,949,700) | 41 | 2,000 | (2,000, 2,000) |
|                 |     | 30                        | 50             | 5,032,700 | (4,984,600, 5,081,200) | 2,722,200                  | (2,696,200, 2,748,400) | 54 | 5,500 | (5,500, 5,600)                         | 1,837,400 | (1,819,900, 1,855,100) | 67 | 3,700 | (3,700, 3,700)                       | 884,800   | (876,400, 893,300)     | 33 | 1,800 | (1,800, 1,900) |
|                 | M   | 20                        | 60             | 5,032,700 | (4,984,600, 5,081,200) | 2,722,200                  | (2,696,200, 2,748,400) | 54 | 5,500 | (5,500, 5,600)                         | 1,994,800 | (1,975,800, 2,014,000) | 73 | 4,000 | (4,000, 4,100)                       | 727,400   | (720,500, 734,400)     | 27 | 1,500 | (1,500, 1,500) |
|                 |     | 40                        | 40             | 5,032,700 | (4,984,600, 5,081,200) | 2,722,200                  | (2,696,200, 2,748,400) | 54 | 5,500 | (5,500, 5,600)                         | 1,703,300 | (1,687,000, 1,719,700) | 63 | 3,400 | (3,400, 3,500)                       | 1,019,000 | (1,009,200, 1,028,800) | 37 | 2,100 | (2,100, 2,100) |

| World Region            | Sex | Classification Thresholds |                | Total YLL              |                          | Premature cancer mortality |                        |       |                | Premature preventable cancer mortality |                        |                        |       |                | Premature treatable cancer mortality |                        |                        |       |                |                |
|-------------------------|-----|---------------------------|----------------|------------------------|--------------------------|----------------------------|------------------------|-------|----------------|----------------------------------------|------------------------|------------------------|-------|----------------|--------------------------------------|------------------------|------------------------|-------|----------------|----------------|
|                         |     | PAF (%)                   | Rel. Surv. (%) | N                      | UI                       | N                          | UI                     | %     | ASR            | UI                                     | N                      | UI                     | %     | ASR            | UI                                   | N                      | UI                     | %     | ASR            | UI             |
| Western Europe          | F   | 30                        | 50             | 3,612,200              | (3,571,900, 3,652,900)   | 1,960,100                  | (1,938,300, 1,982,200) | 54    | 3,900          | (3,900, 4,000)                         | 1,212,100              | (1,198,600, 1,225,800) | 62    | 2,400          | (2,400, 2,400)                       | 748,000                | (739,700, 756,400)     | 38    | 1,500          | (1,500, 1,500) |
|                         |     | 20                        | 60             | 3,612,200              | (3,571,900, 3,652,900)   | 1,960,100                  | (1,938,300, 1,982,200) | 54    | 3,900          | (3,900, 4,000)                         | 1,313,800              | (1,299,200, 1,328,600) | 67    | 2,600          | (2,600, 2,600)                       | 646,300                | (639,100, 653,600)     | 33    | 1,300          | (1,300, 1,300) |
|                         |     | 40                        | 40             | 3,612,200              | (3,571,900, 3,652,900)   | 1,960,100                  | (1,938,300, 1,982,200) | 54    | 3,900          | (3,900, 4,000)                         | 1,043,500              | (1,031,800, 1,055,200) | 53    | 2,100          | (2,100, 2,100)                       | 916,700                | (906,500, 927,000)     | 47    | 1,800          | (1,800, 1,900) |
|                         | B   | 30                        | 50             | 11,285,800             | (11,220,400, 11,351,700) | 6,039,500                  | (6,004,400, 6,074,700) | 54    | 4,800          | (4,800, 4,900)                         | 4,000,200              | (3,977,000, 4,023,500) | 66    | 3,200          | (3,100, 3,200)                       | 2,039,300              | (2,027,400, 2,051,200) | 34    | 1,700          | (1,700, 1,700) |
|                         |     | 20                        | 60             | 11,285,800             | (11,220,400, 11,351,700) | 6,039,500                  | (6,004,400, 6,074,700) | 54    | 4,800          | (4,800, 4,900)                         | 4,326,500              | (4,301,400, 4,351,700) | 72    | 3,400          | (3,400, 3,400)                       | 1,713,000              | (1,703,100, 1,723,000) | 28    | 1,400          | (1,400, 1,400) |
|                         |     | 40                        | 40             | 11,285,800             | (11,220,400, 11,351,700) | 6,039,500                  | (6,004,400, 6,074,700) | 54    | 4,800          | (4,800, 4,900)                         | 3,606,700              | (3,585,800, 3,627,700) | 60    | 2,900          | (2,800, 2,900)                       | 2,432,800              | (2,418,700, 2,447,000) | 40    | 2,000          | (2,000, 2,000) |
|                         | M   | 30                        | 50             | 6,376,400              | (6,326,800, 6,426,400)   | 3,453,800                  | (3,427,000, 3,480,900) | 54    | 5,500          | (5,500, 5,600)                         | 2,325,300              | (2,307,200, 2,343,500) | 67    | 3,700          | (3,700, 3,700)                       | 1,128,500              | (1,119,800, 1,137,400) | 33    | 1,900          | (1,800, 1,900) |
|                         |     | 20                        | 60             | 6,376,400              | (6,326,800, 6,426,400)   | 3,453,800                  | (3,427,000, 3,480,900) | 54    | 5,500          | (5,500, 5,600)                         | 2,526,600              | (2,506,900, 2,546,400) | 73    | 4,000          | (4,000, 4,100)                       | 927,200                | (920,000, 934,500)     | 27    | 1,500          | (1,500, 1,500) |
|                         |     | 40                        | 40             | 6,376,400              | (6,326,800, 6,426,400)   | 3,453,800                  | (3,427,000, 3,480,900) | 54    | 5,500          | (5,500, 5,600)                         | 2,140,600              | (2,123,900, 2,157,400) | 62    | 3,400          | (3,400, 3,400)                       | 1,313,200              | (1,303,000, 1,323,500) | 38    | 2,100          | (2,100, 2,200) |
| F                       | 30  | 50                        | 4,909,400      | (4,866,400, 4,952,800) | 2,585,700                | (2,563,000, 2,608,500)     | 53                     | 4,100 | (4,100, 4,200) | 1,674,900                              | (1,660,200, 1,689,700) | 65                     | 2,700 | (2,600, 2,700) | 910,700                              | (902,800, 918,800)     | 35                     | 1,500 | (1,500, 1,500) |                |
|                         | 20  | 60                        | 4,909,400      | (4,866,400, 4,952,800) | 2,585,700                | (2,563,000, 2,608,500)     | 53                     | 4,100 | (4,100, 4,200) | 1,799,900                              | (1,784,100, 1,815,800) | 70                     | 2,900 | (2,800, 2,900) | 785,800                              | (778,900, 792,700)     | 30                     | 1,300 | (1,300, 1,300) |                |
|                         | 40  | 40                        | 4,909,400      | (4,866,400, 4,952,800) | 2,585,700                | (2,563,000, 2,608,500)     | 53                     | 4,100 | (4,100, 4,200) | 1,466,100                              | (1,453,200, 1,479,100) | 57                     | 2,300 | (2,300, 2,400) | 1,119,600                            | (1,109,700, 1,129,500) | 43                     | 1,800 | (1,800, 1,800) |                |
| Australia & New Zealand | B   | 30                        | 50             | 1,183,200              | (1,169,300, 1,197,300)   | 616,200                    | (608,900, 623,500)     | 52    | 3,700          | (3,600, 3,700)                         | 374,400                | (370,000, 378,900)     | 61    | 2,200          | (2,200, 2,200)                       | 241,700                | (238,900, 244,600)     | 39    | 1,500          | (1,400, 1,500) |
|                         |     | 20                        | 60             | 1,183,200              | (1,169,300, 1,197,300)   | 616,200                    | (608,900, 623,500)     | 52    | 3,700          | (3,600, 3,700)                         | 413,200                | (408,400, 418,100)     | 67    | 2,400          | (2,400, 2,500)                       | 203,000                | (200,600, 205,400)     | 33    | 1,200          | (1,200, 1,200) |
|                         |     | 40                        | 40             | 1,183,200              | (1,169,300, 1,197,300)   | 616,200                    | (608,900, 623,500)     | 52    | 3,700          | (3,600, 3,700)                         | 332,600                | (328,700, 336,500)     | 54    | 2,000          | (1,900, 2,000)                       | 283,600                | (280,300, 287,000)     | 46    | 1,700          | (1,700, 1,700) |
|                         | M   | 30                        | 50             | 652,400                | (642,400, 662,500)       | 327,900                    | (322,900, 333,000)     | 50    | 3,900          | (3,900, 4,000)                         | 198,800                | (195,700, 201,900)     | 61    | 2,400          | (2,300, 2,400)                       | 129,100                | (127,200, 131,200)     | 39    | 1,600          | (1,500, 1,600) |

| World Region          | Sex | Classification Thresholds |                | Total YLL                |                          | Premature cancer mortality |                          |       |                 | Premature preventable cancer mortality |                          |                          |       |                | Premature treatable cancer mortality |                          |                          |       |                |                |
|-----------------------|-----|---------------------------|----------------|--------------------------|--------------------------|----------------------------|--------------------------|-------|-----------------|----------------------------------------|--------------------------|--------------------------|-------|----------------|--------------------------------------|--------------------------|--------------------------|-------|----------------|----------------|
|                       |     | PAF (%)                   | Rel. Surv. (%) | N                        | UI                       | N                          | UI                       | %     | ASR             | UI                                     | N                        | UI                       | %     | ASR            | UI                                   | N                        | UI                       | %     | ASR            | UI             |
| Oceania excl. Aust/NZ | F   | 20                        | 60             | 652,400                  | (642,400, 662,500)       | 327,900                    | (322,900, 333,000)       | 50    | 3,900           | (3,900, 4,000)                         | 221,300                  | (217,900, 224,700)       | 67    | 2,600          | (2,600, 2,700)                       | 106,600                  | (105,000, 108,300)       | 33    | 1,300          | (1,300, 1,300) |
|                       |     | 40                        | 40             | 652,400                  | (642,400, 662,500)       | 327,900                    | (322,900, 333,000)       | 50    | 3,900           | (3,900, 4,000)                         | 180,500                  | (177,800, 183,300)       | 55    | 2,200          | (2,100, 2,200)                       | 147,400                  | (145,100, 149,700)       | 45    | 1,800          | (1,800, 1,800) |
|                       |     | 30                        | 50             | 530,800                  | (521,300, 540,500)       | 288,300                    | (283,100, 293,500)       | 54    | 3,400           | (3,400, 3,500)                         | 175,700                  | (172,500, 178,900)       | 61    | 2,100          | (2,000, 2,100)                       | 112,600                  | (110,600, 114,600)       | 39    | 1,400          | (1,300, 1,400) |
|                       |     | 20                        | 60             | 530,800                  | (521,300, 540,500)       | 288,300                    | (283,100, 293,500)       | 54    | 3,400           | (3,400, 3,500)                         | 191,900                  | (188,500, 195,400)       | 67    | 2,300          | (2,200, 2,300)                       | 96,400                   | (94,600, 98,100)         | 33    | 1,200          | (1,100, 1,200) |
|                       |     | 40                        | 40             | 530,800                  | (521,300, 540,500)       | 288,300                    | (283,100, 293,500)       | 54    | 3,400           | (3,400, 3,500)                         | 152,100                  | (149,300, 154,800)       | 53    | 1,800          | (1,800, 1,800)                       | 136,200                  | (133,800, 138,700)       | 47    | 1,600          | (1,600, 1,700) |
|                       |     | 30                        | 50             | 346,000                  | (295,300, 435,900)       | 264,100                    | (225,300, 332,700)       | 76    | 6,600           | (5,600, 8,300)                         | 166,000                  | (141,600, 209,100)       | 63    | 4,200          | (3,500, 5,200)                       | 98,100                   | (83,700, 123,600)        | 37    | 2,500          | (2,100, 3,100) |
|                       | B   | 20                        | 60             | 346,000                  | (295,300, 435,900)       | 264,100                    | (225,300, 332,700)       | 76    | 6,600           | (5,600, 8,300)                         | 183,600                  | (156,700, 231,300)       | 70    | 4,600          | (3,900, 5,800)                       | 80,400                   | (68,600, 101,300)        | 30    | 2,000          | (1,700, 2,600) |
|                       |     | 40                        | 40             | 346,000                  | (295,300, 435,900)       | 264,100                    | (225,300, 332,700)       | 76    | 6,600           | (5,600, 8,300)                         | 157,300                  | (134,200, 198,200)       | 60    | 3,900          | (3,400, 5,000)                       | 106,800                  | (91,100, 134,500)        | 40    | 2,700          | (2,300, 3,400) |
|                       |     | 30                        | 50             | 157,500                  | (126,300, 225,800)       | 112,700                    | (90,400, 161,600)        | 72    | 6,000           | (4,800, 8,600)                         | 70,300                   | (56,400, 100,700)        | 62    | 3,700          | (3,000, 5,300)                       | 42,400                   | (34,000, 60,800)         | 38    | 2,200          | (1,800, 3,200) |
|                       | M   | 20                        | 60             | 157,500                  | (126,300, 225,800)       | 112,700                    | (90,400, 161,600)        | 72    | 6,000           | (4,800, 8,600)                         | 79,700                   | (63,900, 114,200)        | 71    | 4,200          | (3,400, 6,000)                       | 33,000                   | (26,500, 47,300)         | 29    | 1,800          | (1,400, 2,500) |
|                       |     | 40                        | 40             | 157,500                  | (126,300, 225,800)       | 112,700                    | (90,400, 161,600)        | 72    | 6,000           | (4,800, 8,600)                         | 68,300                   | (54,800, 98,000)         | 61    | 3,600          | (2,900, 5,200)                       | 44,300                   | (35,600, 63,600)         | 39    | 2,400          | (1,900, 3,400) |
|                       |     | 30                        | 50             | 188,500                  | (154,100, 268,900)       | 151,400                    | (123,800, 216,000)       | 80    | 7,300           | (6,000, 10,400)                        | 95,700                   | (78,200, 136,600)        | 63    | 4,600          | (3,800, 6,600)                       | 55,700                   | (45,500, 79,400)         | 37    | 2,700          | (2,200, 3,800) |
| 20                    |     | 60                        | 188,500        | (154,100, 268,900)       | 151,400                  | (123,800, 216,000)         | 80                       | 7,300 | (6,000, 10,400) | 104,000                                | (85,000, 148,300)        | 69                       | 5,000 | (4,100, 7,200) | 47,400                               | (38,800, 67,600)         | 31                       | 2,300 | (1,900, 3,300) |                |
| F                     | 40  | 40                        | 188,500        | (154,100, 268,900)       | 151,400                  | (123,800, 216,000)         | 80                       | 7,300 | (6,000, 10,400) | 89,000                                 | (72,700, 126,900)        | 59                       | 4,300 | (3,500, 6,100) | 62,400                               | (51,000, 89,100)         | 41                       | 3,000 | (2,500, 4,300) |                |
|                       | 30  | 50                        | 74,790,800     | (73,200,900, 76,415,200) | 43,164,800               | (42,247,200, 44,102,400)   | 58                       | 4,700 | (4,600, 4,800)  | 27,933,100                             | (27,339,300, 28,539,800) | 65                       | 3,000 | (3,000, 3,100) | 15,231,800                           | (14,908,000, 15,562,600) | 35                       | 1,700 | (1,600, 1,700) |                |
| Very High HDI         | B   | 20                        | 60             | 74,790,800               | (73,200,900, 76,415,200) | 43,164,800                 | (42,247,200, 44,102,400) | 58    | 4,700           | (4,600, 4,800)                         | 30,392,500               | (29,746,400, 31,052,600) | 70    | 3,300          | (3,200, 3,400)                       | 12,772,300               | (12,500,800, 13,049,700) | 30    | 1,400          | (1,400, 1,400) |

| World Region | Sex | Classification Thresholds |                | Total YLL                |                            | Premature cancer mortality |                          |                          |                | Premature preventable cancer mortality |                          |                          |                          |                | Premature treatable cancer mortality |                          |                          |                        |                |                |
|--------------|-----|---------------------------|----------------|--------------------------|----------------------------|----------------------------|--------------------------|--------------------------|----------------|----------------------------------------|--------------------------|--------------------------|--------------------------|----------------|--------------------------------------|--------------------------|--------------------------|------------------------|----------------|----------------|
|              |     | PAF (%)                   | Rel. Surv. (%) | N                        | UI                         | N                          | UI                       | %                        | ASR            | UI                                     | N                        | UI                       | %                        | ASR            | UI                                   | N                        | UI                       | %                      | ASR            | UI             |
| High HDI     | M   | 40                        | 40             | 74,790,800               | (73,200,900, 76,415,200)   | 43,164,800                 | (42,247,200, 44,102,400) | 58                       | 4,700          | (4,600, 4,800)                         | 25,029,300               | (24,497,200, 25,572,900) | 58                       | 2,700          | (2,600, 2,800)                       | 18,135,600               | (17,750,000, 18,529,500) | 42                     | 2,000          | (2,000, 2,000) |
|              |     | 30                        | 50             | 41,897,900               | (40,688,100, 43,143,600)   | 24,273,900                 | (23,573,000, 24,995,600) | 58                       | 5,400          | (5,200, 5,500)                         | 16,159,300               | (15,692,700, 16,639,700) | 67                       | 3,500          | (3,400, 3,600)                       | 8,114,600                | (7,880,300, 8,355,900)   | 33                     | 1,800          | (1,800, 1,900) |
|              |     | 20                        | 60             | 41,897,900               | (40,688,100, 43,143,600)   | 24,273,900                 | (23,573,000, 24,995,600) | 58                       | 5,400          | (5,200, 5,500)                         | 17,630,400               | (17,121,300, 18,154,600) | 73                       | 3,900          | (3,800, 4,000)                       | 6,643,500                | (6,451,700, 6,841,100)   | 27                     | 1,500          | (1,400, 1,500) |
|              |     | 40                        | 40             | 41,897,900               | (40,688,100, 43,143,600)   | 24,273,900                 | (23,573,000, 24,995,600) | 58                       | 5,400          | (5,200, 5,500)                         | 14,899,500               | (14,469,300, 15,342,600) | 61                       | 3,300          | (3,200, 3,400)                       | 9,374,400                | (9,103,700, 9,653,100)   | 39                     | 2,100          | (2,000, 2,200) |
|              | F   | 30                        | 50             | 32,892,900               | (31,869,900, 33,948,800)   | 18,890,900                 | (18,303,400, 19,497,300) | 57                       | 4,100          | (4,000, 4,200)                         | 11,773,800               | (11,407,600, 12,151,700) | 62                       | 2,500          | (2,500, 2,600)                       | 7,117,100                | (6,895,800, 7,345,600)   | 38                     | 1,600          | (1,500, 1,600) |
|              |     | 20                        | 60             | 32,892,900               | (31,869,900, 33,948,800)   | 18,890,900                 | (18,303,400, 19,497,300) | 57                       | 4,100          | (4,000, 4,200)                         | 12,762,100               | (12,365,200, 13,171,800) | 68                       | 2,800          | (2,700, 2,800)                       | 6,128,800                | (5,938,200, 6,325,500)   | 32                     | 1,300          | (1,300, 1,400) |
|              |     | 40                        | 40             | 32,892,900               | (31,869,900, 33,948,800)   | 18,890,900                 | (18,303,400, 19,497,300) | 57                       | 4,100          | (4,000, 4,200)                         | 10,129,700               | (9,814,700, 10,454,900)  | 54                       | 2,200          | (2,100, 2,300)                       | 8,761,200                | (8,488,700, 9,042,400)   | 46                     | 1,900          | (1,900, 2,000) |
|              | B   | 30                        | 50             | 123,517,100              | (121,538,700, 125,527,700) | 89,171,300                 | (87,743,000, 90,622,800) | 72                       | 5,900          | (5,800, 6,000)                         | 65,037,000               | (63,995,300, 66,095,700) | 73                       | 4,300          | (4,200, 4,300)                       | 24,134,300               | (23,747,700, 24,527,100) | 27                     | 1,600          | (1,600, 1,600) |
|              |     | 20                        | 60             | 123,517,100              | (121,538,700, 125,527,700) | 89,171,300                 | (87,743,000, 90,622,800) | 72                       | 5,900          | (5,800, 6,000)                         | 69,512,900               | (68,399,500, 70,644,400) | 78                       | 4,600          | (4,500, 4,600)                       | 19,658,400               | (19,343,500, 19,978,400) | 22                     | 1,300          | (1,300, 1,300) |
|              |     | 40                        | 40             | 123,517,100              | (121,538,700, 125,527,700) | 89,171,300                 | (87,743,000, 90,622,800) | 72                       | 5,900          | (5,800, 6,000)                         | 61,464,300               | (60,479,800, 62,464,800) | 69                       | 4,000          | (4,000, 4,100)                       | 27,707,000               | (27,263,200, 28,158,000) | 31                     | 1,800          | (1,800, 1,900) |
|              |     | 30                        | 50             | 71,569,900               | (70,011,300, 73,163,300)   | 51,821,600                 | (50,693,000, 52,975,300) | 72                       | 6,900          | (6,700, 7,000)                         | 39,767,300               | (38,901,300, 40,652,700) | 77                       | 5,300          | (5,200, 5,400)                       | 12,054,200               | (11,791,700, 12,322,600) | 23                     | 1,600          | (1,600, 1,600) |
|              |     | M                         | 20             | 60                       | 71,569,900                 | (70,011,300, 73,163,300)   | 51,821,600               | (50,693,000, 52,975,300) | 72             | 6,900                                  | (6,700, 7,000)           | 42,330,700               | (41,408,800, 43,273,100) | 82             | 5,600                                | (5,500, 5,800)           | 9,490,900                | (9,284,200, 9,702,200) | 18             | 1,300          |
| 40           |     |                           | 40             | 71,569,900               | (70,011,300, 73,163,300)   | 51,821,600                 | (50,693,000, 52,975,300) | 72                       | 6,900          | (6,700, 7,000)                         | 38,344,800               | (37,509,800, 39,198,500) | 74                       | 5,100          | (5,000, 5,200)                       | 13,476,700               | (13,183,200, 13,776,800) | 26                     | 1,800          | (1,800, 1,800) |
| F            | 30  | 50                        | 51,947,200     | (50,727,900, 53,195,700) | 37,349,700                 | (36,473,100, 38,247,400)   | 72                       | 4,900                    | (4,800, 5,000) | 25,269,700                             | (24,676,600, 25,877,000) | 68                       | 3,300                    | (3,200, 3,400) | 12,080,100                           | (11,796,500, 12,370,400) | 32                       | 1,600                  | (1,500, 1,600) |                |
|              | 20  | 60                        | 51,947,200     | (50,727,900, 53,195,700) | 37,349,700                 | (36,473,100, 38,247,400)   | 72                       | 4,900                    | (4,800, 5,000) | 27,182,200                             | (26,544,200, 27,835,600) | 73                       | 3,500                    | (3,500, 3,600) | 10,167,500                           | (9,928,900, 10,411,900)  | 27                       | 1,300                  | (1,300, 1,400) |                |
|              | 40  | 40                        | 51,947,200     | (50,727,900, 53,195,700) | 37,349,700                 | (36,473,100, 38,247,400)   | 72                       | 4,900                    | (4,800, 5,000) | 23,119,500                             | (22,576,800, 23,675,200) | 62                       | 3,000                    | (2,900, 3,100) | 14,230,300                           | (13,896,300, 14,572,300) | 38                       | 1,900                  | (1,800, 1,900) |                |

| World Region | Sex | Classification Thresholds |                | Total YLL               |                          | Premature cancer mortality |                          |       |                | Premature preventable cancer mortality |                        |                          |       |                | Premature treatable cancer mortality |                        |                          |       |                |                |
|--------------|-----|---------------------------|----------------|-------------------------|--------------------------|----------------------------|--------------------------|-------|----------------|----------------------------------------|------------------------|--------------------------|-------|----------------|--------------------------------------|------------------------|--------------------------|-------|----------------|----------------|
|              |     | PAF (%)                   | Rel. Surv. (%) | N                       | UI                       | N                          | UI                       | %     | ASR            | UI                                     | N                      | UI                       | %     | ASR            | UI                                   | N                      | UI                       | %     | ASR            | UI             |
| Medium HDI   | B   | 30                        | 50             | 50,655,000              | (48,658,900, 52,733,000) | 38,979,200                 | (37,443,200, 40,578,200) | 77    | 4,500          | (4,300, 4,600)                         | 24,335,300             | (23,376,400, 25,333,600) | 62    | 2,800          | (2,700, 2,900)                       | 14,643,900             | (14,066,800, 15,244,600) | 38    | 1,700          | (1,600, 1,700) |
|              |     | 20                        | 60             | 50,655,000              | (48,658,900, 52,733,000) | 38,979,200                 | (37,443,200, 40,578,200) | 77    | 4,500          | (4,300, 4,600)                         | 27,186,900             | (26,115,600, 28,302,200) | 70    | 3,100          | (3,000, 3,200)                       | 11,792,300             | (11,327,600, 12,276,000) | 30    | 1,300          | (1,300, 1,400) |
|              |     | 40                        | 40             | 50,655,000              | (48,658,900, 52,733,000) | 38,979,200                 | (37,443,200, 40,578,200) | 77    | 4,500          | (4,300, 4,600)                         | 23,124,700             | (22,213,500, 24,073,400) | 59    | 2,700          | (2,500, 2,800)                       | 15,854,500             | (15,229,700, 16,504,900) | 41    | 1,800          | (1,700, 1,900) |
|              | M   | 30                        | 50             | 26,242,100              | (24,598,100, 27,995,900) | 19,866,900                 | (18,622,200, 21,194,600) | 76    | 4,600          | (4,300, 4,900)                         | 12,222,900             | (11,457,200, 13,039,800) | 62    | 2,800          | (2,600, 3,000)                       | 7,644,000              | (7,165,100, 8,154,800)   | 38    | 1,700          | (1,600, 1,900) |
|              |     | 20                        | 60             | 26,242,100              | (24,598,100, 27,995,900) | 19,866,900                 | (18,622,200, 21,194,600) | 76    | 4,600          | (4,300, 4,900)                         | 13,931,400             | (13,058,700, 14,862,500) | 70    | 3,200          | (3,000, 3,400)                       | 5,935,400              | (5,563,600, 6,332,100)   | 30    | 1,400          | (1,300, 1,400) |
|              |     | 40                        | 40             | 26,242,100              | (24,598,100, 27,995,900) | 19,866,900                 | (18,622,200, 21,194,600) | 76    | 4,600          | (4,300, 4,900)                         | 11,925,900             | (11,178,700, 12,722,900) | 60    | 2,800          | (2,600, 2,900)                       | 7,941,000              | (7,443,500, 8,471,700)   | 40    | 1,800          | (1,700, 1,900) |
|              | F   | 30                        | 50             | 24,412,900              | (23,191,600, 25,698,500) | 19,112,400                 | (18,156,200, 20,118,800) | 78    | 4,400          | (4,100, 4,600)                         | 12,112,500             | (11,506,500, 12,750,300) | 63    | 2,800          | (2,600, 2,900)                       | 6,999,900              | (6,649,700, 7,368,500)   | 37    | 1,600          | (1,500, 1,700) |
|              |     | 20                        | 60             | 24,412,900              | (23,191,600, 25,698,500) | 19,112,400                 | (18,156,200, 20,118,800) | 78    | 4,400          | (4,100, 4,600)                         | 13,255,500             | (12,592,400, 13,953,600) | 69    | 3,000          | (2,900, 3,200)                       | 5,856,900              | (5,563,900, 6,165,300)   | 31    | 1,300          | (1,300, 1,400) |
|              |     | 40                        | 40             | 24,412,900              | (23,191,600, 25,698,500) | 19,112,400                 | (18,156,200, 20,118,800) | 78    | 4,400          | (4,100, 4,600)                         | 11,198,900             | (10,638,600, 11,788,600) | 59    | 2,600          | (2,400, 2,700)                       | 7,913,500              | (7,517,600, 8,330,200)   | 41    | 1,800          | (1,700, 1,900) |
| Low HDI      | B   | 30                        | 50             | 16,569,900              | (14,102,500, 19,469,100) | 11,422,400                 | (9,721,500, 13,420,900)  | 69    | 5,000          | (4,200, 5,800)                         | 6,927,400              | (5,895,900, 8,139,500)   | 61    | 3,000          | (2,600, 3,500)                       | 4,494,900              | (3,825,600, 5,281,400)   | 39    | 2,000          | (1,700, 2,300) |
|              |     | 20                        | 60             | 16,569,900              | (14,102,500, 19,469,100) | 11,422,400                 | (9,721,500, 13,420,900)  | 69    | 5,000          | (4,200, 5,800)                         | 7,764,500              | (6,608,300, 9,123,000)   | 68    | 3,400          | (2,900, 3,900)                       | 3,657,800              | (3,113,100, 4,297,800)   | 32    | 1,600          | (1,400, 1,900) |
|              |     | 40                        | 40             | 16,569,900              | (14,102,500, 19,469,100) | 11,422,400                 | (9,721,500, 13,420,900)  | 69    | 5,000          | (4,200, 5,800)                         | 6,579,300              | (5,599,600, 7,730,400)   | 58    | 2,800          | (2,400, 3,300)                       | 4,843,100              | (4,121,900, 5,690,400)   | 42    | 2,100          | (1,800, 2,500) |
|              | M   | 30                        | 50             | 6,772,100               | (5,328,100, 8,607,600)   | 4,183,900                  | (3,291,700, 5,317,800)   | 62    | 3,900          | (3,100, 5,000)                         | 2,260,700              | (1,778,600, 2,873,400)   | 54    | 2,100          | (1,600, 2,600)                       | 1,923,200              | (1,513,100, 2,444,400)   | 46    | 1,800          | (1,400, 2,300) |
|              |     | 20                        | 60             | 6,772,100               | (5,328,100, 8,607,600)   | 4,183,900                  | (3,291,700, 5,317,800)   | 62    | 3,900          | (3,100, 5,000)                         | 2,699,200              | (2,123,700, 3,430,800)   | 65    | 2,500          | (1,900, 3,100)                       | 1,484,600              | (1,168,100, 1,887,000)   | 35    | 1,400          | (1,100, 1,800) |
|              |     | 40                        | 40             | 6,772,100               | (5,328,100, 8,607,600)   | 4,183,900                  | (3,291,700, 5,317,800)   | 62    | 3,900          | (3,100, 5,000)                         | 2,174,700              | (1,711,000, 2,764,100)   | 52    | 2,000          | (1,600, 2,500)                       | 2,009,200              | (1,580,800, 2,553,800)   | 48    | 1,900          | (1,500, 2,400) |
| F            | 30  | 50                        | 9,797,800      | (7,880,200, 12,182,000) | 7,238,500                | (5,821,800, 8,999,900)     | 74                       | 6,000 | (4,800, 7,400) | 4,666,700                              | (3,753,400, 5,802,400) | 64                       | 3,900 | (3,100, 4,800) | 2,571,800                            | (2,068,400, 3,197,600) | 36                       | 2,100 | (1,700, 2,600) |                |

| World Region        | Sex | Classification Thresholds |                | Total YLL   |                            | Premature cancer mortality |                          |    |       | Premature preventable cancer mortality |            |                          |    |       | Premature treatable cancer mortality |            |                          |    |       |                |
|---------------------|-----|---------------------------|----------------|-------------|----------------------------|----------------------------|--------------------------|----|-------|----------------------------------------|------------|--------------------------|----|-------|--------------------------------------|------------|--------------------------|----|-------|----------------|
|                     |     | PAF (%)                   | Rel. Surv. (%) | N           | UI                         | N                          | UI                       | %  | ASR   | UI                                     | N          | UI                       | %  | ASR   | UI                                   | N          | UI                       | %  | ASR   | UI             |
| High income         | B   | 20                        | 60             | 9,797,800   | (7,880,200, 12,182,000)    | 7,238,500                  | (5,821,800, 8,999,900)   | 74 | 6,000 | (4,800, 7,400)                         | 5,065,300  | (4,073,900, 6,297,900)   | 70 | 4,200 | (3,400, 5,200)                       | 2,173,200  | (1,747,900, 2,702,000)   | 30 | 1,800 | (1,400, 2,200) |
|                     |     | 40                        | 40             | 9,797,800   | (7,880,200, 12,182,000)    | 7,238,500                  | (5,821,800, 8,999,900)   | 74 | 6,000 | (4,800, 7,400)                         | 4,404,600  | (3,542,500, 5,476,400)   | 61 | 3,700 | (2,900, 4,500)                       | 2,833,900  | (2,279,200, 3,523,500)   | 39 | 2,300 | (1,900, 2,900) |
|                     |     | 30                        | 50             | 55,247,600  | (54,813,300, 55,690,600)   | 29,694,100                 | (29,460,600, 29,932,200) | 54 | 4,300 | (4,300, 4,400)                         | 19,032,100 | (18,882,500, 19,184,700) | 64 | 2,700 | (2,700, 2,800)                       | 10,662,000 | (10,578,200, 10,747,500) | 36 | 1,600 | (1,600, 1,600) |
|                     |     | 20                        | 60             | 55,247,600  | (54,813,300, 55,690,600)   | 29,694,100                 | (29,460,600, 29,932,200) | 54 | 4,300 | (4,300, 4,400)                         | 20,741,500 | (20,578,400, 20,907,800) | 70 | 3,000 | (3,000, 3,000)                       | 8,952,600  | (8,882,200, 9,024,400)   | 30 | 1,300 | (1,300, 1,300) |
|                     |     | 40                        | 40             | 55,247,600  | (54,813,300, 55,690,600)   | 29,694,100                 | (29,460,600, 29,932,200) | 54 | 4,300 | (4,300, 4,400)                         | 16,969,000 | (16,835,600, 17,105,000) | 57 | 2,400 | (2,400, 2,500)                       | 12,725,100 | (12,625,100, 12,827,200) | 43 | 1,900 | (1,900, 1,900) |
|                     |     | 30                        | 50             | 30,559,000  | (30,233,500, 30,894,200)   | 16,307,000                 | (16,133,300, 16,485,900) | 53 | 4,700 | (4,700, 4,800)                         | 10,623,800 | (10,510,600, 10,740,300) | 65 | 3,100 | (3,000, 3,100)                       | 5,683,200  | (5,622,700, 5,745,600)   | 35 | 1,700 | (1,700, 1,700) |
|                     | M   | 20                        | 60             | 30,559,000  | (30,233,500, 30,894,200)   | 16,307,000                 | (16,133,300, 16,485,900) | 53 | 4,700 | (4,700, 4,800)                         | 11,651,400 | (11,527,300, 11,779,200) | 71 | 3,400 | (3,300, 3,400)                       | 4,655,600  | (4,606,000, 4,706,700)   | 29 | 1,400 | (1,400, 1,400) |
|                     |     | 40                        | 40             | 30,559,000  | (30,233,500, 30,894,200)   | 16,307,000                 | (16,133,300, 16,485,900) | 53 | 4,700 | (4,700, 4,800)                         | 9,722,500  | (9,618,900, 9,829,100)   | 60 | 2,800 | (2,800, 2,800)                       | 6,584,500  | (6,514,400, 6,656,700)   | 40 | 1,900 | (1,900, 2,000) |
|                     |     | 30                        | 50             | 24,688,600  | (24,401,900, 24,983,500)   | 13,387,100                 | (13,231,600, 13,546,900) | 54 | 3,900 | (3,900, 4,000)                         | 8,408,300  | (8,310,700, 8,508,700)   | 63 | 2,500 | (2,400, 2,500)                       | 4,978,800  | (4,920,900, 5,038,200)   | 37 | 1,500 | (1,500, 1,500) |
|                     |     | 20                        | 60             | 24,688,600  | (24,401,900, 24,983,500)   | 13,387,100                 | (13,231,600, 13,546,900) | 54 | 3,900 | (3,900, 4,000)                         | 9,090,100  | (8,984,600, 9,198,700)   | 68 | 2,700 | (2,600, 2,700)                       | 4,297,000  | (4,247,100, 4,348,300)   | 32 | 1,300 | (1,300, 1,300) |
|                     |     | 40                        | 40             | 24,688,600  | (24,401,900, 24,983,500)   | 13,387,100                 | (13,231,600, 13,546,900) | 54 | 3,900 | (3,900, 4,000)                         | 7,246,500  | (7,162,300, 7,333,000)   | 54 | 2,100 | (2,100, 2,200)                       | 6,140,600  | (6,069,300, 6,214,000)   | 46 | 1,800 | (1,800, 1,800) |
|                     |     | 30                        | 50             | 119,522,800 | (118,872,200, 120,185,300) | 85,662,100                 | (85,195,800, 86,136,900) | 72 | 6,100 | (6,000, 6,100)                         | 63,249,200 | (62,904,900, 63,599,800) | 74 | 4,500 | (4,400, 4,500)                       | 22,412,900 | (22,290,900, 22,537,100) | 26 | 1,600 | (1,600, 1,600) |
| Upper middle income | B   | 20                        | 60             | 119,522,800 | (118,872,200, 120,185,300) | 85,662,100                 | (85,195,800, 86,136,900) | 72 | 6,100 | (6,000, 6,100)                         | 67,228,600 | (66,862,700, 67,601,300) | 78 | 4,700 | (4,700, 4,800)                       | 18,433,400 | (18,333,100, 18,535,600) | 22 | 1,300 | (1,300, 1,300) |
|                     |     | 40                        | 40             | 119,522,800 | (118,872,200, 120,185,300) | 85,662,100                 | (85,195,800, 86,136,900) | 72 | 6,100 | (6,000, 6,100)                         | 59,628,800 | (59,304,300, 59,959,400) | 70 | 4,200 | (4,200, 4,200)                       | 26,033,200 | (25,891,500, 26,177,500) | 30 | 1,800 | (1,800, 1,900) |
|                     |     | 30                        | 50             | 69,921,500  | (69,431,100, 70,424,200)   | 50,466,800                 | (50,112,900, 50,829,600) | 72 | 7,300 | (7,200, 7,300)                         | 39,274,700 | (38,999,300, 39,557,100) | 78 | 5,600 | (5,600, 5,700)                       | 11,192,100 | (11,113,600, 11,272,500) | 22 | 1,600 | (1,600, 1,600) |
|                     | M   | 20                        | 60             | 69,921,500  | (69,431,100, 70,424,200)   | 50,466,800                 | (50,112,900, 50,829,600) | 72 | 7,300 | (7,200, 7,300)                         | 41,514,200 | (41,223,100, 41,812,700) | 82 | 6,000 | (5,900, 6,000)                       | 8,952,600  | (8,889,800, 9,017,000)   | 18 | 1,300 | (1,300, 1,300) |

| World Region        | Sex | Classification Thresholds |                | Total YLL                |                          | Premature cancer mortality |                          |       |                | Premature preventable cancer mortality |                          |                          |       |                | Premature treatable cancer mortality |                          |                          |       |                |                |
|---------------------|-----|---------------------------|----------------|--------------------------|--------------------------|----------------------------|--------------------------|-------|----------------|----------------------------------------|--------------------------|--------------------------|-------|----------------|--------------------------------------|--------------------------|--------------------------|-------|----------------|----------------|
|                     |     | PAF (%)                   | Rel. Surv. (%) | N                        | UI                       | N                          | UI                       | %     | ASR            | UI                                     | N                        | UI                       | %     | ASR            | UI                                   | N                        | UI                       | %     | ASR            | UI             |
| Lower middle income | F   | 40                        | 40             | 69,921,500               | (69,431,100, 70,424,200) | 50,466,800                 | (50,112,900, 50,829,600) | 72    | 7,300          | (7,200, 7,300)                         | 37,755,400               | (37,490,600, 38,026,800) | 75    | 5,400          | (5,400, 5,500)                       | 12,711,400               | (12,622,200, 12,802,800) | 25    | 1,800          | (1,800, 1,800) |
|                     |     | 30                        | 50             | 49,601,300               | (49,176,800, 50,037,600) | 35,195,300                 | (34,894,100, 35,504,900) | 71    | 4,900          | (4,900, 5,000)                         | 23,974,500               | (23,769,300, 24,185,400) | 68    | 3,300          | (3,300, 3,400)                       | 11,220,800               | (11,124,800, 11,319,500) | 32    | 1,600          | (1,600, 1,600) |
|                     |     | 20                        | 60             | 49,601,300               | (49,176,800, 50,037,600) | 35,195,300                 | (34,894,100, 35,504,900) | 71    | 4,900          | (4,900, 5,000)                         | 25,714,400               | (25,494,400, 25,940,600) | 73    | 3,600          | (3,600, 3,600)                       | 9,480,800                | (9,399,700, 9,564,200)   | 27    | 1,300          | (1,300, 1,300) |
|                     |     | 40                        | 40             | 49,601,300               | (49,176,800, 50,037,600) | 35,195,300                 | (34,894,100, 35,504,900) | 71    | 4,900          | (4,900, 5,000)                         | 21,873,400               | (21,686,200, 22,065,800) | 62    | 3,000          | (3,000, 3,100)                       | 13,321,800               | (13,207,800, 13,439,000) | 38    | 1,900          | (1,900, 1,900) |
|                     | B   | 30                        | 50             | 69,549,900               | (67,597,400, 71,644,700) | 53,241,200                 | (51,746,500, 54,844,800) | 77    | 4,600          | (4,500, 4,800)                         | 32,814,500               | (31,893,300, 33,802,900) | 62    | 2,900          | (2,800, 2,900)                       | 20,426,700               | (19,853,200, 21,041,900) | 38    | 1,800          | (1,700, 1,800) |
|                     |     | 20                        | 60             | 69,549,900               | (67,597,400, 71,644,700) | 53,241,200                 | (51,746,500, 54,844,800) | 77    | 4,600          | (4,500, 4,800)                         | 36,779,200               | (35,746,700, 37,887,000) | 69    | 3,200          | (3,100, 3,300)                       | 16,461,900               | (15,999,800, 16,957,800) | 31    | 1,400          | (1,400, 1,500) |
|                     |     | 40                        | 40             | 69,549,900               | (67,597,400, 71,644,700) | 53,241,200                 | (51,746,500, 54,844,800) | 77    | 4,600          | (4,500, 4,800)                         | 30,972,400               | (30,102,900, 31,905,200) | 58    | 2,700          | (2,600, 2,800)                       | 22,268,800               | (21,643,700, 22,939,500) | 42    | 1,900          | (1,900, 2,000) |
|                     | M   | 30                        | 50             | 35,937,200               | (34,487,400, 37,547,900) | 27,081,100                 | (25,988,500, 28,294,800) | 75    | 4,700          | (4,600, 5,000)                         | 16,508,700               | (15,842,700, 17,248,600) | 61    | 2,900          | (2,800, 3,000)                       | 10,572,400               | (10,145,900, 11,046,300) | 39    | 1,800          | (1,800, 1,900) |
|                     |     | 20                        | 60             | 35,937,200               | (34,487,400, 37,547,900) | 27,081,100                 | (25,988,500, 28,294,800) | 75    | 4,700          | (4,600, 5,000)                         | 18,898,400               | (18,135,900, 19,745,400) | 70    | 3,300          | (3,200, 3,500)                       | 8,182,700                | (7,852,600, 8,549,500)   | 30    | 1,400          | (1,400, 1,500) |
|                     |     | 40                        | 40             | 35,937,200               | (34,487,400, 37,547,900) | 27,081,100                 | (25,988,500, 28,294,800) | 75    | 4,700          | (4,600, 5,000)                         | 16,030,900               | (15,384,200, 16,749,400) | 59    | 2,800          | (2,700, 3,000)                       | 11,050,200               | (10,604,300, 11,545,400) | 41    | 1,900          | (1,800, 2,000) |
|                     |     | 30                        | 50             | 33,612,700               | (32,321,800, 35,033,800) | 26,160,100                 | (25,155,400, 27,266,100) | 78    | 4,500          | (4,300, 4,700)                         | 16,305,800               | (15,679,600, 16,995,200) | 62    | 2,800          | (2,700, 2,900)                       | 9,854,300                | (9,475,800, 10,270,900)  | 38    | 1,700          | (1,600, 1,800) |
|                     | F   | 20                        | 60             | 33,612,700               | (32,321,800, 35,033,800) | 26,160,100                 | (25,155,400, 27,266,100) | 78    | 4,500          | (4,300, 4,700)                         | 17,880,800               | (17,194,100, 18,636,800) | 68    | 3,100          | (3,000, 3,200)                       | 8,279,200                | (7,961,300, 8,629,300)   | 32    | 1,400          | (1,400, 1,500) |
| 40                  |     | 40                        | 33,612,700     | (32,321,800, 35,033,800) | 26,160,100               | (25,155,400, 27,266,100)   | 78                       | 4,500 | (4,300, 4,700) | 14,941,400                             | (14,367,600, 15,573,100) | 57                       | 2,600 | (2,500, 2,700) | 11,218,600                           | (10,787,800, 11,693,000) | 43                       | 1,900 | (1,800, 2,000) |                |
| Low income          | B   | 30                        | 50             | 11,921,300               | (10,957,300, 13,000,000) | 8,149,000                  | (7,490,100, 8,886,500)   | 68    | 5,200          | (4,800, 5,700)                         | 5,160,300                | (4,743,000, 5,627,300)   | 63    | 3,300          | (3,000, 3,600)                       | 2,988,700                | (2,747,100, 3,259,200)   | 37    | 1,900          | (1,700, 2,100) |
|                     |     | 20                        | 60             | 11,921,300               | (10,957,300, 13,000,000) | 8,149,000                  | (7,490,100, 8,886,500)   | 68    | 5,200          | (4,800, 5,700)                         | 5,743,500                | (5,279,100, 6,263,300)   | 70    | 3,700          | (3,400, 4,000)                       | 2,405,500                | (2,211,000, 2,623,200)   | 30    | 1,500          | (1,400, 1,700) |
|                     |     | 40                        | 40             | 11,921,300               | (10,957,300, 13,000,000) | 8,149,000                  | (7,490,100, 8,886,500)   | 68    | 5,200          | (4,800, 5,700)                         | 4,917,900                | (4,520,200, 5,362,900)   | 60    | 3,100          | (2,900, 3,400)                       | 3,231,100                | (2,969,900, 3,523,500)   | 40    | 2,100          | (1,900, 2,300) |

| World Region | Sex | Classification Thresholds |                | Total YLL   |                            | Premature cancer mortality |                            |    |       | Premature preventable cancer mortality |             |                            |    |       | Premature treatable cancer mortality |            |                          |    |       |                |
|--------------|-----|---------------------------|----------------|-------------|----------------------------|----------------------------|----------------------------|----|-------|----------------------------------------|-------------|----------------------------|----|-------|--------------------------------------|------------|--------------------------|----|-------|----------------|
|              |     | PAF (%)                   | Rel. Surv. (%) | N           | UI                         | N                          | UI                         | %  | ASR   | UI                                     | N           | UI                         | %  | ASR   | UI                                   | N          | UI                       | %  | ASR   | UI             |
| World        | M   | 30                        | 50             | 4,834,200   | (4,243,100, 5,541,100)     | 2,952,700                  | (2,591,600, 3,384,400)     | 61 | 4,100 | (3,600, 4,700)                         | 1,725,700   | (1,514,700, 1,978,100)     | 58 | 2,400 | (2,100, 2,700)                       | 1,226,900  | (1,076,900, 1,406,300)   | 42 | 1,700 | (1,500, 2,000) |
|              |     | 20                        | 60             | 4,834,200   | (4,243,100, 5,541,100)     | 2,952,700                  | (2,591,600, 3,384,400)     | 61 | 4,100 | (3,600, 4,700)                         | 2,019,100   | (1,772,200, 2,314,300)     | 68 | 2,800 | (2,400, 3,200)                       | 933,600    | (819,400, 1,070,100)     | 32 | 1,300 | (1,200, 1,500) |
|              |     | 40                        | 40             | 4,834,200   | (4,243,100, 5,541,100)     | 2,952,700                  | (2,591,600, 3,384,400)     | 61 | 4,100 | (3,600, 4,700)                         | 1,667,400   | (1,463,500, 1,911,200)     | 56 | 2,300 | (2,000, 2,600)                       | 1,285,200  | (1,128,100, 1,473,200)   | 44 | 1,800 | (1,600, 2,100) |
|              | F   | 30                        | 50             | 7,087,000   | (6,349,100, 7,941,200)     | 5,196,400                  | (4,655,300, 5,822,600)     | 73 | 6,200 | (5,600, 7,000)                         | 3,434,600   | (3,076,900, 3,848,500)     | 66 | 4,200 | (3,700, 4,700)                       | 1,761,800  | (1,578,300, 1,974,100)   | 34 | 2,100 | (1,900, 2,300) |
|              |     | 20                        | 60             | 7,087,000   | (6,349,100, 7,941,200)     | 5,196,400                  | (4,655,300, 5,822,600)     | 73 | 6,200 | (5,600, 7,000)                         | 3,724,400   | (3,336,600, 4,173,300)     | 72 | 4,500 | (4,000, 5,000)                       | 1,471,900  | (1,318,700, 1,649,300)   | 28 | 1,700 | (1,600, 2,000) |
|              |     | 40                        | 40             | 7,087,000   | (6,349,100, 7,941,200)     | 5,196,400                  | (4,655,300, 5,822,600)     | 73 | 6,200 | (5,600, 7,000)                         | 3,250,400   | (2,912,000, 3,642,200)     | 63 | 3,900 | (3,500, 4,400)                       | 1,945,900  | (1,743,300, 2,180,400)   | 37 | 2,300 | (2,100, 2,600) |
|              | B   | 30                        | 50             | 265,639,400 | (259,316,700, 272,116,400) | 182,809,400                | (178,458,200, 187,266,800) | 69 | 5,200 | (5,100, 5,300)                         | 124,280,000 | (121,321,900, 127,310,200) | 68 | 3,600 | (3,500, 3,600)                       | 58,529,500 | (57,136,400, 59,956,600) | 32 | 1,700 | (1,600, 1,700) |
|              |     | 20                        | 60             | 265,639,400 | (259,316,700, 272,116,400) | 182,809,400                | (178,458,200, 187,266,800) | 69 | 5,200 | (5,100, 5,300)                         | 134,908,000 | (131,696,900, 138,197,400) | 74 | 3,900 | (3,800, 3,900)                       | 47,901,400 | (46,761,300, 49,069,400) | 26 | 1,400 | (1,300, 1,400) |
|              |     | 40                        | 40             | 265,639,400 | (259,316,700, 272,116,400) | 182,809,400                | (178,458,200, 187,266,800) | 69 | 5,200 | (5,100, 5,300)                         | 116,241,200 | (113,474,500, 119,075,500) | 64 | 3,300 | (3,200, 3,400)                       | 66,568,200 | (64,983,800, 68,191,300) | 36 | 1,900 | (1,900, 1,900) |
|              | M   | 30                        | 50             | 146,539,600 | (141,844,700, 151,389,800) | 100,183,500                | (96,973,800, 103,499,500)  | 68 | 5,800 | (5,600, 6,000)                         | 70,435,200  | (68,178,600, 72,766,500)   | 70 | 4,100 | (4,000, 4,200)                       | 29,748,400 | (28,795,300, 30,733,000) | 30 | 1,700 | (1,700, 1,800) |
|              |     | 20                        | 60             | 146,539,600 | (141,844,700, 151,389,800) | 100,183,500                | (96,973,800, 103,499,500)  | 68 | 5,800 | (5,600, 6,000)                         | 76,618,900  | (74,164,200, 79,154,900)   | 76 | 4,400 | (4,300, 4,600)                       | 23,564,600 | (22,809,700, 24,344,600) | 24 | 1,400 | (1,300, 1,400) |
|              |     | 40                        | 40             | 146,539,600 | (141,844,700, 151,389,800) | 100,183,500                | (96,973,800, 103,499,500)  | 68 | 5,800 | (5,600, 6,000)                         | 67,368,500  | (65,210,100, 69,598,300)   | 67 | 3,900 | (3,800, 4,000)                       | 32,815,100 | (31,763,700, 33,901,200) | 33 | 1,900 | (1,800, 2,000) |
|              | F   | 30                        | 50             | 119,099,900 | (114,911,600, 123,440,800) | 82,625,900                 | (79,720,300, 85,637,400)   | 69 | 4,700 | (4,500, 4,800)                         | 53,844,800  | (51,951,300, 55,807,300)   | 65 | 3,000 | (2,900, 3,200)                       | 28,781,100 | (27,769,000, 29,830,100) | 35 | 1,600 | (1,600, 1,700) |
|              |     | 20                        | 60             | 119,099,900 | (114,911,600, 123,440,800) | 82,625,900                 | (79,720,300, 85,637,400)   | 69 | 4,700 | (4,500, 4,800)                         | 58,289,100  | (56,239,300, 60,413,600)   | 71 | 3,300 | (3,200, 3,400)                       | 24,336,800 | (23,481,000, 25,223,800) | 29 | 1,400 | (1,300, 1,400) |
|              |     | 40                        | 40             | 119,099,900 | (114,911,600, 123,440,800) | 82,625,900                 | (79,720,300, 85,637,400)   | 69 | 4,700 | (4,500, 4,800)                         | 48,872,700  | (47,154,100, 50,654,000)   | 59 | 2,800 | (2,700, 2,900)                       | 33,753,100 | (32,566,200, 34,983,400) | 41 | 1,900 | (1,800, 2,000) |

B: both sexes, M: males, F: females, Rel Surv (%): Relative Survival (%), PAF (%): Population Attributable Fraction (%) \*For the sensitivity analysis, different upper and lower bounds of PAF (%) and relative survival (%) cut-offs were used.



**Appendix Table 4: Avertable, preventable, and treatable years of life lost (YLL) from cancer among persons aged 70-99 years in numbers (N), proportions (%) and age-standardised rates (ASR per 100,000 person-years) by world region, Human Development Index (HDI), and Income group (Gross National Income), 2020**

| World Region    | Sex | Total YLL |                        | Avertable cancer mortality |                        |    |        |                  | Avertable preventable cancer mortality |                    |    |        |                  | Avertable treatable cancer mortality |                    |    |        |                  |
|-----------------|-----|-----------|------------------------|----------------------------|------------------------|----|--------|------------------|----------------------------------------|--------------------|----|--------|------------------|--------------------------------------|--------------------|----|--------|------------------|
|                 |     | N         | UI                     | N                          | UI                     | %  | ASR    | UI               | N                                      | UI                 | %  | ASR    | UI               | N                                    | UI                 | %  | ASR    | UI               |
| Eastern Africa  | B   | 8,592,600 | (8,136,000, 9,074,700) | 789,700                    | (747,700, 834,000)     | 9  | 10,200 | (9,700, 10,800)  | 439,800                                | (416,500, 464,500) | 56 | 5,700  | (5,400, 6,000)   | 349,800                              | (331,200, 369,500) | 44 | 4,500  | (4,300, 4,800)   |
|                 | M   | 3,345,100 | (3,067,300, 3,648,000) | 385,700                    | (353,700, 420,600)     | 12 | 11,900 | (10,900, 13,000) | 159,400                                | (146,200, 173,800) | 41 | 4,900  | (4,500, 5,400)   | 226,300                              | (207,500, 246,800) | 59 | 7,000  | (6,400, 7,700)   |
|                 | F   | 5,247,500 | (4,887,500, 5,634,000) | 404,000                    | (376,200, 433,700)     | 8  | 9,000  | (8,400, 9,700)   | 280,400                                | (261,200, 301,100) | 69 | 6,200  | (5,800, 6,700)   | 123,500                              | (115,100, 132,600) | 31 | 2,800  | (2,600, 3,000)   |
| Middle Africa   | B   | 2,708,500 | (2,564,300, 2,860,900) | 278,100                    | (263,300, 293,700)     | 10 | 9,500  | (9,000, 10,000)  | 134,700                                | (127,500, 142,300) | 48 | 4,600  | (4,300, 4,800)   | 143,400                              | (135,700, 151,500) | 52 | 4,900  | (4,600, 5,200)   |
|                 | M   | 1,136,700 | (1,041,200, 1,240,800) | 159,200                    | (145,900, 173,800)     | 14 | 12,600 | (11,500, 13,700) | 51,300                                 | (47,000, 56,000)   | 32 | 4,000  | (3,700, 4,400)   | 107,900                              | (98,900, 117,800)  | 68 | 8,600  | (7,800, 9,300)   |
|                 | F   | 1,571,900 | (1,465,500, 1,686,000) | 118,800                    | (110,800, 127,500)     | 8  | 7,200  | (6,700, 7,700)   | 83,400                                 | (77,700, 89,400)   | 70 | 5,000  | (4,700, 5,400)   | 35,500                               | (33,100, 38,000)   | 30 | 2,100  | (2,000, 2,300)   |
| Northern Africa | B   | 5,807,900 | (5,646,900, 5,973,500) | 1,042,000                  | (1,013,100, 1,071,700) | 18 | 12,100 | (11,800, 12,500) | 594,000                                | (577,500, 610,900) | 57 | 7,000  | (6,800, 7,100)   | 448,000                              | (435,600, 460,800) | 43 | 5,200  | (5,000, 5,300)   |
|                 | M   | 3,097,700 | (2,972,900, 3,227,800) | 573,100                    | (550,000, 597,200)     | 19 | 15,000 | (14,400, 15,600) | 315,800                                | (303,000, 329,000) | 55 | 8,200  | (7,900, 8,600)   | 257,400                              | (247,000, 268,200) | 45 | 6,800  | (6,500, 7,100)   |
|                 | F   | 2,710,200 | (2,607,800, 2,816,500) | 468,800                    | (451,100, 487,200)     | 17 | 9,900  | (9,500, 10,300)  | 278,200                                | (267,700, 289,100) | 59 | 5,900  | (5,700, 6,100)   | 190,600                              | (183,400, 198,100) | 41 | 4,000  | (3,900, 4,200)   |
| Southern Africa | B   | 1,993,900 | (1,970,900, 2,017,000) | 309,600                    | (306,100, 313,200)     | 16 | 14,500 | (14,300, 14,700) | 180,400                                | (178,300, 182,500) | 58 | 8,400  | (8,300, 8,500)   | 129,200                              | (127,800, 130,800) | 42 | 6,000  | (6,000, 6,100)   |
|                 | M   | 913,500   | (898,700, 928,600)     | 160,200                    | (157,600, 162,800)     | 18 | 20,400 | (20,100, 20,800) | 80,400                                 | (79,100, 81,700)   | 50 | 10,200 | (10,000, 10,300) | 79,700                               | (78,500, 81,100)   | 50 | 10,300 | (10,100, 10,400) |
|                 | F   | 1,080,300 | (1,063,200, 1,097,700) | 149,500                    | (147,100, 151,900)     | 14 | 11,100 | (10,900, 11,300) | 100,000                                | (98,400, 101,600)  | 67 | 7,400  | (7,300, 7,600)   | 49,500                               | (48,700, 50,300)   | 33 | 3,700  | (3,600, 3,700)   |
| Western Africa  | B   | 6,177,600 | (5,795,700, 6,584,600) | 609,400                    | (571,700, 649,500)     | 10 | 9,600  | (9,000, 10,200)  | 304,100                                | (285,300, 324,200) | 50 | 4,800  | (4,500, 5,100)   | 305,300                              | (286,400, 325,400) | 50 | 4,800  | (4,500, 5,100)   |
|                 | M   | 2,548,800 | (2,305,900, 2,817,300) | 320,300                    | (289,800, 354,100)     | 13 | 11,200 | (10,200, 12,400) | 118,700                                | (107,400, 131,200) | 37 | 4,100  | (3,700, 4,500)   | 201,600                              | (182,400, 222,800) | 63 | 7,100  | (6,400, 7,900)   |

| World Region     | Sex | Total YLL  |                          | Avertable cancer mortality |                          |    |        |                  | Avertable preventable cancer mortality |                          |    |        |                  | Avertable treatable cancer mortality |                        |    |        |                  |
|------------------|-----|------------|--------------------------|----------------------------|--------------------------|----|--------|------------------|----------------------------------------|--------------------------|----|--------|------------------|--------------------------------------|------------------------|----|--------|------------------|
|                  |     | N          | UI                       | N                          | UI                       | %  | ASR    | UI               | N                                      | UI                       | %  | ASR    | UI               | N                                    | UI                     | %  | ASR    | UI               |
| Caribbean        | F   | 3,628,800  | (3,340,500, 3,941,900)   | 289,100                    | (266,100, 314,000)       | 8  | 8,300  | (7,600, 9,000)   | 185,400                                | (170,700, 201,400)       | 64 | 5,300  | (4,900, 5,800)   | 103,600                              | (95,400, 112,600)      | 36 | 3,000  | (2,700, 3,200)   |
|                  | B   | 1,587,300  | (1,551,200, 1,624,300)   | 512,300                    | (500,700, 524,300)       | 32 | 16,300 | (15,900, 16,700) | 267,300                                | (261,200, 273,500)       | 52 | 8,700  | (8,500, 8,900)   | 245,100                              | (239,500, 250,800)     | 48 | 7,600  | (7,500, 7,800)   |
|                  | M   | 824,600    | (800,000, 850,000)       | 304,300                    | (295,200, 313,700)       | 37 | 21,700 | (21,100, 22,400) | 136,700                                | (132,600, 140,900)       | 45 | 10,000 | (9,700, 10,300)  | 167,600                              | (162,600, 172,800)     | 55 | 11,700 | (11,400, 12,100) |
|                  | F   | 762,700    | (736,600, 789,700)       | 208,000                    | (200,900, 215,400)       | 27 | 12,000 | (11,600, 12,400) | 130,600                                | (126,100, 135,200)       | 63 | 7,600  | (7,300, 7,800)   | 77,400                               | (74,800, 80,200)       | 37 | 4,400  | (4,300, 4,600)   |
| Central America  | B   | 3,621,500  | (3,588,400, 3,655,000)   | 810,900                    | (803,500, 818,400)       | 22 | 9,700  | (9,700, 9,800)   | 463,900                                | (459,600, 468,200)       | 57 | 5,600  | (5,600, 5,700)   | 347,000                              | (343,900, 350,300)     | 43 | 4,100  | (4,100, 4,200)   |
|                  | M   | 1,687,500  | (1,665,500, 1,709,800)   | 441,600                    | (435,800, 447,400)       | 26 | 11,900 | (11,800, 12,100) | 222,500                                | (219,600, 225,500)       | 50 | 6,100  | (6,000, 6,200)   | 219,100                              | (216,200, 222,000)     | 50 | 5,800  | (5,800, 5,900)   |
|                  | F   | 1,934,000  | (1,909,000, 1,959,300)   | 369,300                    | (364,500, 374,200)       | 19 | 8,000  | (7,900, 8,100)   | 241,300                                | (238,200, 244,500)       | 65 | 5,300  | (5,200, 5,300)   | 128,000                              | (126,300, 129,700)     | 35 | 2,800  | (2,800, 2,800)   |
| South America    | B   | 13,590,900 | (13,505,700, 13,676,600) | 3,705,600                  | (3,682,400, 3,729,000)   | 27 | 14,000 | (13,900, 14,000) | 2,114,100                              | (2,100,800, 2,127,400)   | 57 | 8,000  | (8,000, 8,100)   | 1,591,500                            | (1,581,500, 1,601,600) | 43 | 5,900  | (5,900, 6,000)   |
|                  | M   | 6,787,700  | (6,729,100, 6,846,800)   | 1,998,800                  | (1,981,500, 2,016,200)   | 29 | 17,900 | (17,700, 18,000) | 1,056,700                              | (1,047,600, 1,065,900)   | 53 | 9,500  | (9,400, 9,600)   | 942,100                              | (933,900, 950,300)     | 47 | 8,300  | (8,300, 8,400)   |
|                  | F   | 6,803,100  | (6,740,700, 6,866,100)   | 1,706,800                  | (1,691,200, 1,722,600)   | 25 | 11,100 | (11,000, 11,200) | 1,057,400                              | (1,047,700, 1,067,200)   | 62 | 6,900  | (6,800, 7,000)   | 649,500                              | (643,500, 655,500)     | 38 | 4,200  | (4,200, 4,300)   |
| Northern America | B   | 15,262,000 | (15,213,900, 15,310,200) | 5,993,400                  | (5,974,600, 6,012,400)   | 39 | 14,300 | (14,200, 14,300) | 3,689,200                              | (3,677,600, 3,700,800)   | 62 | 8,900  | (8,900, 8,900)   | 2,304,300                            | (2,297,000, 2,311,500) | 38 | 5,400  | (5,400, 5,400)   |
|                  | M   | 8,029,300  | (7,994,500, 8,064,200)   | 3,189,700                  | (3,175,800, 3,203,500)   | 40 | 17,300 | (17,200, 17,300) | 1,878,600                              | (1,870,500, 1,886,800)   | 59 | 10,300 | (10,300, 10,300) | 1,311,000                            | (1,305,400, 1,316,700) | 41 | 7,000  | (6,900, 7,000)   |
|                  | F   | 7,232,700  | (7,199,200, 7,266,300)   | 2,803,800                  | (2,790,800, 2,816,800)   | 39 | 11,900 | (11,900, 12,000) | 1,810,600                              | (1,802,200, 1,819,000)   | 65 | 7,700  | (7,700, 7,800)   | 993,200                              | (988,600, 997,800)     | 35 | 4,200  | (4,100, 4,200)   |
| Eastern Asia     | B   | 92,017,700 | (91,750,200, 92,285,900) | 25,833,400                 | (25,758,300, 25,908,700) | 28 | 19,000 | (19,000, 19,100) | 19,650,700                             | (19,593,600, 19,708,000) | 76 | 14,500 | (14,500, 14,600) | 6,182,700                            | (6,164,700, 6,200,700) | 24 | 4,500  | (4,500, 4,500)   |
|                  | M   | 56,124,000 | (55,905,100, 56,343,800) | 15,298,100                 | (15,238,400, 15,358,000) | 27 | 25,300 | (25,200, 25,400) | 11,802,100                             | (11,756,100, 11,848,300) | 77 | 19,600 | (19,500, 19,700) | 3,496,000                            | (3,482,400, 3,509,700) | 23 | 5,800  | (5,700, 5,800)   |
|                  | F   | 35,893,600 | (35,735,600, 36,052,400) | 10,535,300                 | (10,488,900, 10,581,900) | 29 | 13,900 | (13,900, 14,000) | 7,848,600                              | (7,814,000, 7,883,300)   | 74 | 10,400 | (10,400, 10,500) | 2,686,700                            | (2,674,900, 2,698,600) | 26 | 3,500  | (3,500, 3,500)   |

| World Region       | Sex | Total YLL  |                          | Avertable cancer mortality |                        |    |        |                  | Avertable preventable cancer mortality |                        |    |        |                  | Avertable treatable cancer mortality |                        |    |       |                |
|--------------------|-----|------------|--------------------------|----------------------------|------------------------|----|--------|------------------|----------------------------------------|------------------------|----|--------|------------------|--------------------------------------|------------------------|----|-------|----------------|
|                    |     | N          | UI                       | N                          | UI                     | %  | ASR    | UI               | N                                      | UI                     | %  | ASR    | UI               | N                                    | UI                     | %  | ASR   | UI             |
| South-Eastern Asia | B   | 20,986,500 | (20,711,200, 21,265,500) | 3,494,300                  | (3,448,500, 3,540,700) | 17 | 12,300 | (12,200, 12,500) | 2,293,400                              | (2,263,300, 2,323,900) | 66 | 8,100  | (8,000, 8,200)   | 1,200,900                            | (1,185,100, 1,216,800) | 34 | 4,200 | (4,200, 4,300) |
|                    | M   | 11,378,200 | (11,159,300, 11,601,300) | 1,868,700                  | (1,832,800, 1,905,300) | 16 | 16,000 | (15,700, 16,300) | 1,224,600                              | (1,201,100, 1,248,700) | 66 | 10,500 | (10,300, 10,700) | 644,100                              | (631,700, 656,700)     | 34 | 5,500 | (5,400, 5,600) |
|                    | F   | 9,608,300  | (9,436,900, 9,782,900)   | 1,625,600                  | (1,596,600, 1,655,100) | 17 | 9,800  | (9,600, 10,000)  | 1,068,800                              | (1,049,700, 1,088,200) | 66 | 6,400  | (6,300, 6,600)   | 556,800                              | (546,900, 566,900)     | 34 | 3,300 | (3,300, 3,400) |
| South Central Asia | B   | 41,955,200 | (41,457,400, 42,458,900) | 5,304,700                  | (5,241,700, 5,368,400) | 13 | 7,300  | (7,200, 7,400)   | 3,220,500                              | (3,182,300, 3,259,200) | 61 | 4,400  | (4,400, 4,500)   | 2,084,200                            | (2,059,400, 2,109,200) | 39 | 2,900 | (2,800, 2,900) |
|                    | M   | 21,771,500 | (21,409,300, 22,139,800) | 2,853,800                  | (2,806,300, 2,902,000) | 13 | 8,300  | (8,100, 8,400)   | 1,665,200                              | (1,637,500, 1,693,400) | 58 | 4,800  | (4,700, 4,900)   | 1,188,600                            | (1,168,800, 1,208,700) | 42 | 3,400 | (3,400, 3,500) |
|                    | F   | 20,183,700 | (19,844,200, 20,529,000) | 2,450,900                  | (2,409,700, 2,492,800) | 12 | 6,400  | (6,300, 6,500)   | 1,555,300                              | (1,529,100, 1,581,900) | 63 | 4,100  | (4,000, 4,100)   | 895,600                              | (880,500, 910,900)     | 37 | 2,300 | (2,300, 2,400) |
| Western Asia       | B   | 6,992,600  | (6,906,100, 7,080,300)   | 1,530,300                  | (1,511,400, 1,549,500) | 22 | 15,500 | (15,300, 15,700) | 968,200                                | (956,200, 980,300)     | 63 | 9,800  | (9,700, 10,000)  | 562,100                              | (555,200, 569,200)     | 37 | 5,600 | (5,600, 5,700) |
|                    | M   | 3,923,700  | (3,859,100, 3,989,300)   | 922,200                    | (907,100, 937,700)     | 24 | 21,700 | (21,300, 22,000) | 599,200                                | (589,400, 609,300)     | 65 | 14,100 | (13,900, 14,400) | 323,000                              | (317,700, 328,400)     | 35 | 7,500 | (7,400, 7,700) |
|                    | F   | 3,069,000  | (3,011,600, 3,127,500)   | 608,100                    | (596,700, 619,700)     | 20 | 10,800 | (10,600, 11,000) | 368,900                                | (362,000, 376,000)     | 61 | 6,500  | (6,400, 6,700)   | 239,100                              | (234,700, 243,700)     | 39 | 4,200 | (4,200, 4,300) |
| Eastern Europe     | B   | 17,470,600 | (17,369,000, 17,572,700) | 4,869,400                  | (4,841,100, 4,897,900) | 28 | 16,100 | (16,000, 16,200) | 2,934,100                              | (2,917,100, 2,951,300) | 60 | 9,800  | (9,800, 9,900)   | 1,935,300                            | (1,924,000, 1,946,600) | 40 | 6,300 | (6,300, 6,400) |
|                    | M   | 9,875,100  | (9,796,700, 9,954,200)   | 2,518,900                  | (2,498,900, 2,539,000) | 26 | 24,600 | (24,400, 24,800) | 1,505,100                              | (1,493,200, 1,517,200) | 60 | 14,800 | (14,700, 15,000) | 1,013,700                            | (1,005,700, 1,021,900) | 40 | 9,800 | (9,700, 9,900) |
|                    | F   | 7,595,400  | (7,530,800, 7,660,600)   | 2,350,500                  | (2,330,500, 2,370,700) | 31 | 11,600 | (11,500, 11,700) | 1,429,000                              | (1,416,800, 1,441,200) | 61 | 7,000  | (7,000, 7,100)   | 921,500                              | (913,700, 929,400)     | 39 | 4,500 | (4,500, 4,500) |
| Northern Europe    | B   | 5,414,800  | (5,377,000, 5,453,000)   | 2,732,400                  | (2,713,300, 2,751,700) | 50 | 18,400 | (18,300, 18,500) | 1,627,200                              | (1,615,800, 1,638,700) | 60 | 11,100 | (11,000, 11,200) | 1,105,200                            | (1,097,500, 1,113,000) | 40 | 7,300 | (7,200, 7,300) |
|                    | M   | 2,877,100  | (2,850,200, 2,904,300)   | 1,481,200                  | (1,467,300, 1,495,200) | 51 | 22,400 | (22,200, 22,600) | 838,000                                | (830,200, 846,000)     | 57 | 12,800 | (12,700, 13,000) | 643,200                              | (637,100, 649,300)     | 43 | 9,500 | (9,400, 9,600) |
|                    | F   | 2,537,700  | (2,511,500, 2,564,200)   | 1,251,200                  | (1,238,300, 1,264,300) | 49 | 15,200 | (15,100, 15,400) | 789,200                                | (781,000, 797,400)     | 63 | 9,700  | (9,600, 9,800)   | 462,100                              | (457,300, 466,900)     | 37 | 5,500 | (5,500, 5,600) |
| Southern Europe    | B   | 8,644,800  | (8,582,300, 8,707,700)   | 3,849,700                  | (3,821,900, 3,877,700) | 45 | 16,100 | (16,000, 16,300) | 2,323,600                              | (2,306,900, 2,340,600) | 60 | 9,900  | (9,800, 10,000)  | 1,526,000                            | (1,515,000, 1,537,100) | 40 | 6,200 | (6,200, 6,300) |

| World Region            | Sex | Total YLL   |                            | Avertable cancer mortality |                          |    |        |                  | Avertable preventable cancer mortality |                          |    |        |                  | Avertable treatable cancer mortality |                          |    |        |                 |
|-------------------------|-----|-------------|----------------------------|----------------------------|--------------------------|----|--------|------------------|----------------------------------------|--------------------------|----|--------|------------------|--------------------------------------|--------------------------|----|--------|-----------------|
|                         |     | N           | UI                         | N                          | UI                       | %  | ASR    | UI               | N                                      | UI                       | %  | ASR    | UI               | N                                    | UI                       | %  | ASR    | UI              |
|                         | M   | 5,032,700   | (4,984,600, 5,081,200)     | 2,244,100                  | (2,222,700, 2,265,700)   | 45 | 22,100 | (21,900, 22,300) | 1,370,500                              | (1,357,400, 1,383,700)   | 61 | 13,700 | (13,600, 13,900) | 873,600                              | (865,200, 882,000)       | 39 | 8,300  | (8,300, 8,400)  |
|                         | F   | 3,612,200   | (3,571,900, 3,652,900)     | 1,605,600                  | (1,587,700, 1,623,700)   | 44 | 11,600 | (11,500, 11,700) | 953,100                                | (942,500, 963,900)       | 59 | 6,900  | (6,900, 7,000)   | 652,500                              | (645,200, 659,800)       | 41 | 4,700  | (4,600, 4,700)  |
| Western Europe          | B   | 11,285,800  | (11,220,400, 11,351,700)   | 5,115,400                  | (5,085,700, 5,145,200)   | 45 | 17,200 | (17,100, 17,300) | 3,018,900                              | (3,001,400, 3,036,500)   | 59 | 10,300 | (10,300, 10,400) | 2,096,500                            | (2,084,300, 2,108,700)   | 41 | 6,800  | (6,800, 6,900)  |
|                         | M   | 6,376,400   | (6,326,800, 6,426,400)     | 2,846,400                  | (2,824,300, 2,868,700)   | 45 | 22,200 | (22,000, 22,300) | 1,659,200                              | (1,646,300, 1,672,200)   | 58 | 13,200 | (13,100, 13,300) | 1,187,100                            | (1,177,900, 1,196,400)   | 42 | 9,000  | (8,900, 9,000)  |
|                         | F   | 4,909,400   | (4,866,400, 4,952,800)     | 2,269,000                  | (2,249,100, 2,289,100)   | 46 | 13,300 | (13,200, 13,400) | 1,359,700                              | (1,347,800, 1,371,700)   | 60 | 8,100  | (8,000, 8,200)   | 909,300                              | (901,400, 917,400)       | 40 | 5,200  | (5,100, 5,200)  |
|                         | B   | 1,183,200   | (1,169,300, 1,197,300)     | 543,600                    | (537,300, 550,100)       | 46 | 15,300 | (15,100, 15,500) | 314,700                                | (311,000, 318,400)       | 58 | 9,000  | (8,900, 9,100)   | 229,000                              | (226,300, 231,700)       | 42 | 6,300  | (6,200, 6,400)  |
| Australia & New Zealand | M   | 652,400     | (642,400, 662,500)         | 311,600                    | (306,800, 316,400)       | 48 | 18,900 | (18,700, 19,200) | 172,300                                | (169,700, 175,000)       | 55 | 10,600 | (10,500, 10,800) | 139,200                              | (137,100, 141,400)       | 45 | 8,300  | (8,200, 8,400)  |
|                         | F   | 530,800     | (521,300, 540,500)         | 232,100                    | (227,900, 236,300)       | 44 | 12,100 | (11,900, 12,300) | 142,400                                | (139,800, 145,000)       | 61 | 7,500  | (7,400, 7,700)   | 89,700                               | (88,100, 91,400)         | 39 | 4,600  | (4,500, 4,700)  |
|                         | B   | 346,000     | (295,300, 435,900)         | 49,400                     | (42,200, 62,300)         | 14 | 17,100 | (14,600, 21,500) | 28,500                                 | (24,300, 35,900)         | 58 | 9,800  | (8,400, 12,400)  | 20,900                               | (17,900, 26,400)         | 42 | 7,300  | (6,200, 9,100)  |
| Oceania excl. Aust/NZ   | M   | 157,500     | (126,300, 225,800)         | 28,400                     | (22,800, 40,700)         | 18 | 21,300 | (17,100, 30,600) | 15,000                                 | (12,100, 21,600)         | 53 | 11,200 | (9,000, 16,100)  | 13,400                               | (10,700, 19,100)         | 47 | 10,100 | (8,100, 14,600) |
|                         | F   | 188,500     | (154,100, 268,900)         | 21,000                     | (17,200, 30,000)         | 11 | 13,500 | (11,000, 19,300) | 13,500                                 | (11,000, 19,200)         | 64 | 8,600  | (7,100, 12,300)  | 7,600                                | (6,200, 10,800)          | 36 | 4,900  | (4,000, 6,900)  |
| Very High HDI           | B   | 74,790,800  | (73,200,900, 76,415,200)   | 30,106,600                 | (29,466,500, 30,760,500) | 40 | 15,900 | (15,600, 16,300) | 18,705,500                             | (18,307,900, 19,111,800) | 62 | 10,000 | (9,800, 10,200)  | 11,401,000                           | (11,158,700, 11,648,700) | 38 | 5,900  | (5,800, 6,000)  |
|                         | M   | 41,897,900  | (40,688,100, 43,143,600)   | 16,774,700                 | (16,290,300, 17,273,400) | 40 | 21,200 | (20,600, 21,900) | 10,344,100                             | (10,045,400, 10,651,600) | 62 | 13,300 | (12,900, 13,700) | 6,430,600                            | (6,244,900, 6,621,800)   | 38 | 8,000  | (7,800, 8,200)  |
|                         | F   | 32,892,900  | (31,869,900, 33,948,800)   | 13,331,900                 | (12,917,200, 13,759,800) | 41 | 12,000 | (11,600, 12,400) | 8,361,500                              | (8,101,400, 8,629,900)   | 63 | 7,600  | (7,300, 7,800)   | 4,970,400                            | (4,815,800, 5,130,000)   | 37 | 4,400  | (4,300, 4,600)  |
| High HDI                | B   | 123,517,100 | (121,538,700, 125,527,700) | 29,228,800                 | (28,760,600, 29,704,500) | 24 | 17,100 | (16,800, 17,400) | 21,037,400                             | (20,700,400, 21,379,800) | 72 | 12,300 | (12,100, 12,500) | 8,191,400                            | (8,060,200, 8,324,700)   | 28 | 4,700  | (4,700, 4,800)  |
|                         | M   | 71,569,900  | (70,011,300, 73,163,300)   | 16,906,600                 | (16,538,400, 17,283,000) | 24 | 22,400 | (21,900, 22,900) | 12,187,100                             | (11,921,700, 12,458,400) | 72 | 16,200 | (15,800, 16,500) | 4,719,500                            | (4,616,700, 4,824,600)   | 28 | 6,200  | (6,100, 6,400)  |

| World Region        | Sex | Total YLL   |                            | Avertable cancer mortality |                          |    |        |                  | Avertable preventable cancer mortality |                          |    |        |                  | Avertable treatable cancer mortality |                        |    |       |                |
|---------------------|-----|-------------|----------------------------|----------------------------|--------------------------|----|--------|------------------|----------------------------------------|--------------------------|----|--------|------------------|--------------------------------------|------------------------|----|-------|----------------|
|                     |     | N           | UI                         | N                          | UI                       | %  | ASR    | UI               | N                                      | UI                       | %  | ASR    | UI               | N                                    | UI                     | %  | ASR   | UI             |
| Medium HDI          | F   | 51,947,200  | (50,727,900, 53,195,700)   | 12,322,200                 | (12,032,900, 12,618,300) | 24 | 12,900 | (12,600, 13,200) | 8,850,300                              | (8,642,500, 9,063,000)   | 72 | 9,300  | (9,100, 9,500)   | 3,471,900                            | (3,390,400, 3,555,300) | 28 | 3,600 | (3,500, 3,700) |
|                     | B   | 50,655,000  | (48,658,900, 52,733,000)   | 6,341,800                  | (6,091,900, 6,602,000)   | 13 | 7,800  | (7,500, 8,100)   | 3,930,400                              | (3,775,500, 4,091,600)   | 62 | 4,800  | (4,600, 5,000)   | 2,411,400                            | (2,316,400, 2,510,300) | 38 | 3,000 | (2,800, 3,100) |
|                     | M   | 26,242,100  | (24,598,100, 27,995,900)   | 3,343,100                  | (3,133,700, 3,566,600)   | 13 | 8,900  | (8,300, 9,500)   | 1,980,400                              | (1,856,400, 2,112,800)   | 59 | 5,300  | (5,000, 5,600)   | 1,362,700                            | (1,277,300, 1,453,800) | 41 | 3,600 | (3,400, 3,900) |
|                     | F   | 24,412,900  | (23,191,600, 25,698,500)   | 2,998,700                  | (2,848,700, 3,156,600)   | 12 | 6,800  | (6,500, 7,200)   | 1,950,000                              | (1,852,400, 2,052,700)   | 65 | 4,500  | (4,200, 4,700)   | 1,048,700                            | (996,300, 1,104,000)   | 35 | 2,400 | (2,300, 2,500) |
| Low HDI             | B   | 16,569,900  | (14,102,500, 19,469,100)   | 1,662,700                  | (1,415,100, 1,953,600)   | 10 | 9,700  | (8,200, 11,400)  | 874,500                                | (744,300, 1,027,500)     | 53 | 5,100  | (4,300, 6,000)   | 788,100                              | (670,800, 926,000)     | 47 | 4,600 | (3,900, 5,400) |
|                     | M   | 6,772,100   | (5,328,100, 8,607,600)     | 862,100                    | (678,300, 1,095,800)     | 13 | 11,500 | (9,000, 14,600)  | 349,600                                | (275,000, 444,300)       | 41 | 4,600  | (3,600, 5,900)   | 512,500                              | (403,200, 651,400)     | 59 | 6,900 | (5,400, 8,700) |
|                     | F   | 9,797,800   | (7,880,200, 12,182,000)    | 800,600                    | (643,900, 995,400)       | 8  | 8,300  | (6,700, 10,300)  | 524,900                                | (422,200, 652,700)       | 66 | 5,400  | (4,400, 6,800)   | 275,600                              | (221,700, 342,700)     | 34 | 2,900 | (2,300, 3,600) |
| High income         | B   | 55,247,600  | (54,813,300, 55,690,600)   | 24,571,800                 | (24,378,600, 24,768,800) | 44 | 15,900 | (15,700, 16,000) | 15,144,900                             | (15,025,800, 15,266,300) | 62 | 9,900  | (9,800, 10,000)  | 9,426,900                            | (9,352,800, 9,502,500) | 38 | 6,000 | (5,900, 6,000) |
|                     | M   | 30,559,000  | (30,233,500, 30,894,200)   | 13,696,800                 | (13,551,000, 13,847,100) | 45 | 20,600 | (20,400, 20,900) | 8,330,500                              | (8,241,800, 8,421,900)   | 61 | 12,700 | (12,600, 12,900) | 5,366,300                            | (5,309,200, 5,425,200) | 39 | 7,900 | (7,800, 8,000) |
|                     | F   | 24,688,600  | (24,401,900, 24,983,500)   | 10,874,900                 | (10,748,600, 11,004,800) | 44 | 12,200 | (12,100, 12,400) | 6,814,400                              | (6,735,200, 6,895,700)   | 63 | 7,700  | (7,600, 7,800)   | 4,060,600                            | (4,013,400, 4,109,100) | 37 | 4,500 | (4,400, 4,500) |
| Upper middle income | B   | 119,522,800 | (118,872,200, 120,185,300) | 29,668,400                 | (29,506,900, 29,832,900) | 25 | 17,700 | (17,600, 17,800) | 21,357,500                             | (21,241,200, 21,475,800) | 72 | 12,800 | (12,800, 12,900) | 8,310,900                            | (8,265,700, 8,357,000) | 28 | 4,900 | (4,900, 4,900) |
|                     | M   | 69,921,500  | (69,431,100, 70,424,200)   | 17,129,200                 | (17,009,100, 17,252,400) | 24 | 23,700 | (23,500, 23,800) | 12,400,000                             | (12,313,100, 12,489,200) | 72 | 17,200 | (17,000, 17,300) | 4,729,200                            | (4,696,000, 4,763,200) | 28 | 6,500 | (6,500, 6,500) |
|                     | F   | 49,601,300  | (49,176,800, 50,037,600)   | 12,539,200                 | (12,431,900, 12,649,500) | 25 | 13,200 | (13,100, 13,300) | 8,957,400                              | (8,880,800, 9,036,200)   | 71 | 9,400  | (9,400, 9,500)   | 3,581,800                            | (3,551,100, 3,613,300) | 29 | 3,700 | (3,700, 3,800) |
| Lower middle income | B   | 69,549,900  | (67,597,400, 71,644,700)   | 9,229,800                  | (8,970,700, 9,507,800)   | 13 | 8,600  | (8,300, 8,800)   | 5,582,900                              | (5,426,200, 5,751,100)   | 60 | 5,200  | (5,100, 5,400)   | 3,646,900                            | (3,544,500, 3,756,800) | 40 | 3,400 | (3,300, 3,500) |
|                     | M   | 35,937,200  | (34,487,400, 37,547,900)   | 4,898,100                  | (4,700,500, 5,117,600)   | 14 | 10,100 | (9,700, 10,600)  | 2,835,200                              | (2,720,800, 2,962,200)   | 58 | 5,900  | (5,600, 6,100)   | 2,062,900                            | (1,979,700, 2,155,400) | 42 | 4,300 | (4,100, 4,500) |
|                     | F   | 33,612,700  | (32,321,800, 35,033,800)   | 4,331,700                  | (4,165,400, 4,514,900)   | 13 | 7,300  | (7,100, 7,600)   | 2,747,700                              | (2,642,200, 2,863,900)   | 63 | 4,700  | (4,500, 4,900)   | 1,584,000                            | (1,523,200, 1,651,000) | 37 | 2,700 | (2,600, 2,800) |

| World Region | Sex | Total YLL   |                            | Avertable cancer mortality |                          |    |        |                  | Avertable preventable cancer mortality |                          |    |        |                  | Avertable treatable cancer mortality |                          |    |       |                |
|--------------|-----|-------------|----------------------------|----------------------------|--------------------------|----|--------|------------------|----------------------------------------|--------------------------|----|--------|------------------|--------------------------------------|--------------------------|----|-------|----------------|
|              |     | N           | UI                         | N                          | UI                       | %  | ASR    | UI               | N                                      | UI                       | %  | ASR    | UI               | N                                    | UI                       | %  | ASR   | UI             |
| Low income   | B   | 11,921,300  | (10,957,300, 13,000,000)   | 1,182,000                  | (1,086,400, 1,288,900)   | 10 | 9,700  | (8,900, 10,600)  | 676,200                                | (621,500, 737,400)       | 57 | 5,600  | (5,100, 6,100)   | 505,800                              | (464,900, 551,500)       | 43 | 4,200 | (3,800, 4,600) |
|              | M   | 4,834,200   | (4,243,100, 5,541,100)     | 592,500                    | (520,000, 679,100)       | 12 | 11,500 | (10,100, 13,100) | 273,400                                | (240,000, 313,400)       | 46 | 5,300  | (4,600, 6,000)   | 319,000                              | (280,000, 365,700)       | 54 | 6,200 | (5,400, 7,100) |
|              | F   | 7,087,000   | (6,349,100, 7,941,200)     | 589,500                    | (528,100, 660,600)       | 8  | 8,500  | (7,600, 9,500)   | 402,800                                | (360,800, 451,300)       | 68 | 5,800  | (5,200, 6,500)   | 186,800                              | (167,300, 209,300)       | 32 | 2,700 | (2,400, 3,000) |
| World        | B   | 265,639,400 | (259,316,700, 272,116,400) | 67,373,600                 | (65,770,000, 69,016,400) | 25 | 14,700 | (14,400, 15,100) | 44,567,300                             | (43,506,500, 45,653,900) | 66 | 9,800  | (9,600, 10,100)  | 22,806,300                           | (22,263,500, 23,362,400) | 34 | 4,900 | (4,800, 5,000) |
|              | M   | 146,539,600 | (141,844,700, 151,389,800) | 37,906,200                 | (36,691,700, 39,160,800) | 26 | 19,100 | (18,500, 19,700) | 24,871,600                             | (24,074,800, 25,694,800) | 66 | 12,600 | (12,200, 13,000) | 13,034,500                           | (12,616,900, 13,466,000) | 34 | 6,500 | (6,300, 6,700) |
|              | F   | 119,099,900 | (114,911,600, 123,440,800) | 29,467,500                 | (28,431,200, 30,541,500) | 25 | 11,400 | (11,000, 11,800) | 19,695,700                             | (19,003,000, 20,413,500) | 67 | 7,600  | (7,400, 7,900)   | 9,771,800                            | (9,428,200, 10,128,000)  | 33 | 3,700 | (3,600, 3,900) |

B: both sexes, M: males, F: females, UI: Uncertainty Interval

**Appendix Table 5: Data sources and estimation methods for premature, preventable, treatable years of life lost (YLL) from cancer (ages 30-69) by country**

| Country        | Sex | Total YLL |                        | Premature cancer mortality |                        |    |       | Premature preventable cancer mortality |         |                    |    | Premature treatable cancer mortality |                |         |                    | Data Quality |       |                |        |
|----------------|-----|-----------|------------------------|----------------------------|------------------------|----|-------|----------------------------------------|---------|--------------------|----|--------------------------------------|----------------|---------|--------------------|--------------|-------|----------------|--------|
|                |     | N         | UI                     | N                          | UI                     | %  | ASR   | UI                                     | N       | UI                 | %  | ASR                                  | UI             | N       | UI                 | %            | ASR   | UI             | Method |
| Eastern Africa |     |           |                        |                            |                        |    |       |                                        |         |                    |    |                                      |                |         |                    |              |       |                |        |
|                | B   | 219,500   | (194,800, 247,300)     | 153,400                    | (136,200, 172,900)     | 70 | 6,300 | (5,600, 7,100)                         | 104,500 | (92,700, 117,700)  | 68 | 4,300                                | (3,800, 4,800) | 49,000  | (43,500, 55,200)   | 32           | 2,000 | (1,800, 2,300) | 3      |
| Burundi        | M   | 90,600    | (75,500, 108,700)      | 55,800                     | (46,500, 67,000)       | 62 | 4,900 | (4,100, 5,900)                         | 33,000  | (27,500, 39,600)   | 59 | 2,800                                | (2,400, 3,400) | 22,900  | (19,100, 27,400)   | 41           | 2,100 | (1,700, 2,500) | 3      |
|                | F   | 128,900   | (110,100, 150,800)     | 97,600                     | (83,400, 114,200)      | 76 | 7,500 | (6,400, 8,800)                         | 71,500  | (61,100, 83,700)   | 73 | 5,600                                | (4,800, 6,500) | 26,100  | (22,300, 30,600)   | 27           | 2,000 | (1,700, 2,300) | 3      |
|                | B   | 15,500    | (13,700, 17,400)       | 11,500                     | (10,200, 12,900)       | 74 | 5,000 | (4,400, 5,600)                         | 8,100   | (7,200, 9,100)     | 70 | 3,500                                | (3,100, 3,900) | 3,400   | (3,000, 3,800)     | 30           | 1,500 | (1,300, 1,700) | 3      |
| Comoros        | M   | 5,600     | (4,700, 6,800)         | 3,800                      | (3,200, 4,600)         | 68 | 3,500 | (2,900, 4,200)                         | 2,200   | (1,800, 2,700)     | 58 | 2,000                                | (1,600, 2,400) | 1,600   | (1,400, 1,900)     | 42           | 1,600 | (1,300, 1,900) | 3      |
|                | F   | 9,800     | (8,400, 11,500)        | 7,600                      | (6,500, 8,900)         | 78 | 6,400 | (5,500, 7,500)                         | 5,800   | (5,000, 6,800)     | 77 | 5,000                                | (4,200, 5,800) | 1,800   | (1,500, 2,100)     | 23           | 1,400 | (1,200, 1,700) | 3      |
|                | B   | 19,100    | (16,900, 21,500)       | 14,800                     | (13,200, 16,700)       | 78 | 4,300 | (3,800, 4,800)                         | 8,000   | (7,100, 9,000)     | 54 | 2,300                                | (2,100, 2,600) | 6,800   | (6,100, 7,700)     | 46           | 2,000 | (1,700, 2,200) | 3      |
| Djibouti       | M   | 7,200     | (6,000, 8,700)         | 5,100                      | (4,300, 6,200)         | 71 | 3,000 | (2,500, 3,600)                         | 2,600   | (2,200, 3,100)     | 51 | 1,500                                | (1,300, 1,800) | 2,500   | (2,100, 3,000)     | 49           | 1,500 | (1,300, 1,800) | 3      |
|                | F   | 11,900    | (10,200, 13,900)       | 9,700                      | (8,300, 11,400)        | 82 | 5,600 | (4,800, 6,600)                         | 5,400   | (4,600, 6,300)     | 56 | 3,200                                | (2,700, 3,700) | 4,300   | (3,700, 5,000)     | 44           | 2,500 | (2,100, 2,900) | 3      |
|                | B   | 60,900    | (54,100, 68,600)       | 41,100                     | (36,500, 46,300)       | 68 | 4,600 | (4,100, 5,200)                         | 22,100  | (19,600, 24,800)   | 54 | 2,500                                | (2,200, 2,800) | 19,100  | (16,900, 21,500)   | 46           | 2,100 | (1,900, 2,400) | 3      |
| Eritrea        | M   | 22,600    | (18,900, 27,200)       | 13,600                     | (11,300, 16,300)       | 60 | 3,300 | (2,800, 4,000)                         | 6,500   | (5,400, 7,800)     | 48 | 1,600                                | (1,300, 1,900) | 7,100   | (5,900, 8,500)     | 52           | 1,700 | (1,400, 2,000) | 3      |
|                | F   | 38,300    | (32,700, 44,800)       | 27,500                     | (23,500, 32,200)       | 72 | 5,900 | (5,100, 6,900)                         | 15,500  | (13,300, 18,200)   | 56 | 3,400                                | (2,900, 4,000) | 12,000  | (10,200, 14,000)   | 44           | 2,500 | (2,200, 3,000) | 3      |
|                | B   | 2,036,000 | (1,925,400, 2,152,900) | 1,342,700                  | (1,269,800, 1,419,800) | 66 | 4,900 | (4,600, 5,200)                         | 752,300 | (711,400, 795,500) | 56 | 2,800                                | (2,600, 2,900) | 590,400 | (558,300, 624,300) | 44           | 2,100 | (2,000, 2,200) | 3      |
| Ethiopia       | M   | 732,100   | (663,100, 808,300)     | 390,300                    | (353,600, 430,900)     | 53 | 3,100 | (2,800, 3,400)                         | 185,700 | (168,200, 205,000) | 48 | 1,500                                | (1,300, 1,600) | 204,700 | (185,400, 225,900) | 52           | 1,600 | (1,500, 1,800) | 3      |

| Country         | Sex | Total YLL |                        | Premature cancer mortality |                      |    |        |                 | Premature preventable cancer mortality |                    |    |       |                | Premature treatable cancer mortality |                    |    |       |                | Data Quality |
|-----------------|-----|-----------|------------------------|----------------------------|----------------------|----|--------|-----------------|----------------------------------------|--------------------|----|-------|----------------|--------------------------------------|--------------------|----|-------|----------------|--------------|
|                 |     | N         | UI                     | N                          | UI                   | %  | ASR    | UI              | N                                      | UI                 | %  | ASR   | UI             | N                                    | UI                 | %  | ASR   | UI             | Method       |
| France, Reunion | F   | 1,303,900 | (1,218,600, 1,395,100) | 952,400                    | (890,100, 1,019,000) | 73 | 6,600  | (6,200, 7,100)  | 566,600                                | (529,500, 606,200) | 59 | 4,000 | (3,700, 4,300) | 385,800                              | (360,500, 412,800) | 41 | 2,600 | (2,500, 2,800) | 3            |
|                 | B   | 35,900    | (33,300, 38,800)       | 23,600                     | (21,900, 25,500)     | 66 | 4,700  | (4,400, 5,100)  | 15,800                                 | (14,600, 17,000)   | 67 | 3,100 | (2,900, 3,400) | 7,800                                | (7,300, 8,500)     | 33 | 1,600 | (1,500, 1,800) | 1            |
|                 | M   | 21,700    | (19,700, 23,900)       | 14,300                     | (13,000, 15,800)     | 66 | 5,800  | (5,300, 6,500)  | 10,100                                 | (9,200, 11,100)    | 70 | 4,100 | (3,700, 4,500) | 4,200                                | (3,800, 4,700)     | 30 | 1,800 | (1,600, 2,000) | 1            |
|                 | F   | 14,200    | (12,600, 16,100)       | 9,300                      | (8,200, 10,500)      | 65 | 3,700  | (3,300, 4,200)  | 5,700                                  | (5,000, 6,400)     | 61 | 2,200 | (2,000, 2,500) | 3,600                                | (3,200, 4,100)     | 39 | 1,500 | (1,300, 1,700) | 1            |
| Kenya           | B   | 975,700   | (925,900, 1,028,300)   | 715,500                    | (678,900, 754,000)   | 73 | 5,800  | (5,500, 6,100)  | 442,800                                | (420,200, 466,700) | 62 | 3,600 | (3,400, 3,800) | 272,600                              | (258,700, 287,300) | 38 | 2,200 | (2,100, 2,300) | 3            |
|                 | M   | 369,500   | (340,900, 400,400)     | 231,100                    | (213,200, 250,400)   | 63 | 4,200  | (3,900, 4,600)  | 123,900                                | (114,300, 134,300) | 54 | 2,200 | (2,100, 2,400) | 107,200                              | (98,900, 116,100)  | 46 | 2,000 | (1,800, 2,100) | 3            |
|                 | F   | 606,300   | (565,700, 649,700)     | 484,400                    | (452,000, 519,100)   | 80 | 7,300  | (6,800, 7,800)  | 318,900                                | (297,600, 341,700) | 66 | 4,900 | (4,500, 5,200) | 165,500                              | (154,400, 177,400) | 34 | 2,500 | (2,300, 2,600) | 3            |
| Madagascar      | B   | 509,400   | (452,200, 573,900)     | 369,700                    | (328,200, 416,500)   | 73 | 5,300  | (4,700, 6,000)  | 229,100                                | (203,400, 258,100) | 62 | 3,300 | (2,900, 3,700) | 140,600                              | (124,800, 158,400) | 38 | 2,000 | (1,800, 2,300) | 3            |
|                 | M   | 200,200   | (166,800, 240,300)     | 135,700                    | (113,100, 162,900)   | 68 | 4,200  | (3,500, 5,000)  | 67,800                                 | (56,500, 81,400)   | 50 | 2,000 | (1,700, 2,500) | 67,900                               | (56,600, 81,500)   | 50 | 2,100 | (1,800, 2,600) | 3            |
|                 | F   | 309,200   | (264,200, 361,900)     | 234,000                    | (199,900, 273,900)   | 76 | 6,400  | (5,400, 7,400)  | 161,300                                | (137,800, 188,800) | 69 | 4,400 | (3,800, 5,200) | 72,700                               | (62,100, 85,000)   | 31 | 1,900 | (1,700, 2,300) | 3            |
| Malawi          | B   | 568,900   | (522,700, 619,100)     | 365,100                    | (335,500, 397,400)   | 64 | 8,100  | (7,500, 8,800)  | 266,200                                | (244,600, 289,700) | 73 | 5,900 | (5,400, 6,400) | 99,000                               | (90,900, 107,700)  | 27 | 2,200 | (2,000, 2,400) | 3            |
|                 | M   | 214,300   | (188,800, 243,100)     | 120,500                    | (106,200, 136,800)   | 56 | 5,700  | (5,100, 6,500)  | 80,700                                 | (71,100, 91,500)   | 67 | 3,800 | (3,300, 4,300) | 39,900                               | (35,100, 45,200)   | 33 | 1,900 | (1,700, 2,200) | 3            |
|                 | F   | 354,600   | (316,400, 397,400)     | 244,600                    | (218,300, 274,100)   | 69 | 10,200 | (9,100, 11,500) | 185,500                                | (165,500, 207,900) | 76 | 7,800 | (7,000, 8,800) | 59,100                               | (52,700, 66,200)   | 24 | 2,400 | (2,200, 2,700) | 3            |
| Mauritius       | B   | 39,300    | (36,600, 42,200)       | 27,400                     | (25,500, 29,500)     | 70 | 3,700  | (3,500, 4,000)  | 15,900                                 | (14,800, 17,000)   | 58 | 2,100 | (2,000, 2,300) | 11,600                               | (10,800, 12,400)   | 42 | 1,600 | (1,500, 1,700) | 1            |
|                 | M   | 19,100    | (17,200, 21,200)       | 12,800                     | (11,600, 14,200)     | 67 | 3,500  | (3,200, 3,900)  | 7,400                                  | (6,700, 8,200)     | 58 | 2,000 | (1,800, 2,200) | 5,400                                | (4,900, 6,000)     | 42 | 1,500 | (1,400, 1,700) | 1            |
|                 | F   | 20,200    | (18,300, 22,300)       | 14,600                     | (13,300, 16,200)     | 72 | 3,900  | (3,600, 4,300)  | 8,500                                  | (7,700, 9,400)     | 58 | 2,300 | (2,100, 2,500) | 6,200                                | (5,600, 6,800)     | 42 | 1,700 | (1,500, 1,800) | 1            |



| Country     | Sex | Total YLL |                      | Premature cancer mortality |                    |    |       |                | Premature preventable cancer mortality |                    |    |       |                | Premature treatable cancer mortality |                    |    |       |                | Data Quality |
|-------------|-----|-----------|----------------------|----------------------------|--------------------|----|-------|----------------|----------------------------------------|--------------------|----|-------|----------------|--------------------------------------|--------------------|----|-------|----------------|--------------|
|             |     | N         | UI                   | N                          | UI                 | %  | ASR   | UI             | N                                      | UI                 | %  | ASR   | UI             | N                                    | UI                 | %  | ASR   | UI             | Method       |
| Mozambique  | B   | 799,300   | (743,900, 858,800)   | 515,400                    | (479,700, 553,800) | 64 | 7,000 | (6,500, 7,500) | 369,200                                | (343,600, 396,700) | 72 | 4,900 | (4,600, 5,300) | 146,200                              | (136,100, 157,100) | 28 | 2,100 | (1,900, 2,200) | 3            |
|             | M   | 311,000   | (278,600, 347,200)   | 187,800                    | (168,200, 209,600) | 60 | 5,800 | (5,200, 6,400) | 120,500                                | (107,900, 134,500) | 64 | 3,500 | (3,100, 3,900) | 67,300                               | (60,300, 75,100)   | 36 | 2,300 | (2,000, 2,500) | 3            |
|             | F   | 488,300   | (444,200, 536,800)   | 327,700                    | (298,100, 360,200) | 67 | 8,000 | (7,300, 8,800) | 248,700                                | (226,200, 273,400) | 76 | 6,100 | (5,500, 6,700) | 79,000                               | (71,800, 86,800)   | 24 | 1,900 | (1,800, 2,100) | 3            |
| Rwanda      | B   | 220,800   | (196,000, 248,800)   | 166,100                    | (147,400, 187,100) | 75 | 5,000 | (4,500, 5,700) | 100,900                                | (89,500, 113,600)  | 61 | 3,100 | (2,700, 3,400) | 65,200                               | (57,900, 73,400)   | 39 | 2,000 | (1,700, 2,200) | 3            |
|             | M   | 88,200    | (73,500, 105,800)    | 61,100                     | (50,900, 73,300)   | 69 | 4,100 | (3,400, 4,900) | 32,900                                 | (27,400, 39,500)   | 54 | 2,200 | (1,800, 2,600) | 28,200                               | (23,500, 33,800)   | 46 | 1,900 | (1,600, 2,300) | 3            |
|             | F   | 132,700   | (113,400, 155,300)   | 105,000                    | (89,700, 122,900)  | 79 | 5,900 | (5,000, 6,900) | 68,000                                 | (58,100, 79,500)   | 65 | 3,900 | (3,300, 4,500) | 37,000                               | (31,600, 43,300)   | 35 | 2,000 | (1,700, 2,400) | 3            |
| Somalia     | B   | 291,200   | (258,500, 328,100)   | 190,200                    | (168,800, 214,300) | 65 | 5,800 | (5,100, 6,500) | 109,500                                | (97,200, 123,300)  | 58 | 3,300 | (3,000, 3,800) | 80,700                               | (71,700, 91,000)   | 42 | 2,400 | (2,200, 2,700) | 3            |
|             | M   | 108,400   | (90,300, 130,100)    | 57,500                     | (47,900, 69,000)   | 53 | 3,700 | (3,100, 4,500) | 27,900                                 | (23,300, 33,500)   | 49 | 1,800 | (1,500, 2,200) | 29,500                               | (24,600, 35,500)   | 51 | 1,900 | (1,600, 2,300) | 3            |
|             | F   | 182,800   | (156,200, 214,000)   | 132,700                    | (113,400, 155,300) | 73 | 7,800 | (6,600, 9,100) | 81,500                                 | (69,700, 95,400)   | 61 | 4,800 | (4,100, 5,600) | 51,200                               | (43,700, 59,900)   | 39 | 2,900 | (2,500, 3,400) | 3            |
| South Sudan | B   | 168,600   | (149,600, 189,900)   | 114,500                    | (101,700, 129,000) | 68 | 4,300 | (3,900, 4,900) | 73,000                                 | (64,800, 82,200)   | 64 | 2,800 | (2,400, 3,100) | 41,500                               | (36,900, 46,800)   | 36 | 1,600 | (1,400, 1,800) | 3            |
|             | M   | 70,300    | (58,600, 84,400)     | 42,100                     | (35,100, 50,600)   | 60 | 3,400 | (2,800, 4,100) | 25,100                                 | (20,900, 30,100)   | 60 | 2,000 | (1,700, 2,400) | 17,100                               | (14,200, 20,500)   | 40 | 1,400 | (1,200, 1,700) | 3            |
|             | F   | 98,200    | (83,900, 115,000)    | 72,400                     | (61,900, 84,700)   | 74 | 5,200 | (4,500, 6,100) | 47,900                                 | (40,900, 56,100)   | 66 | 3,500 | (3,000, 4,100) | 24,500                               | (20,900, 28,700)   | 34 | 1,700 | (1,500, 2,000) | 3            |
| Tanzania    | B   | 947,100   | (899,400, 997,500)   | 677,500                    | (643,300, 713,500) | 72 | 5,200 | (5,000, 5,500) | 482,200                                | (457,900, 507,800) | 71 | 3,700 | (3,500, 3,900) | 195,300                              | (185,400, 205,600) | 29 | 1,500 | (1,400, 1,600) | 3            |
|             | M   | 374,300   | (345,900, 405,000)   | 241,100                    | (222,800, 260,900) | 64 | 3,900 | (3,600, 4,200) | 150,400                                | (139,000, 162,800) | 62 | 2,300 | (2,100, 2,500) | 90,700                               | (83,800, 98,100)   | 38 | 1,600 | (1,400, 1,700) | 3            |
|             | F   | 572,900   | (534,900, 613,500)   | 436,400                    | (407,400, 467,300) | 76 | 6,500 | (6,100, 7,000) | 331,800                                | (309,800, 355,300) | 76 | 5,000 | (4,700, 5,400) | 104,600                              | (97,700, 112,000)  | 24 | 1,500 | (1,400, 1,600) | 3            |
| Uganda      | B   | 970,800   | (926,300, 1,017,400) | 641,300                    | (611,900, 672,100) | 66 | 7,100 | (6,800, 7,500) | 462,900                                | (441,700, 485,200) | 72 | 5,100 | (4,900, 5,300) | 178,400                              | (170,200, 186,900) | 28 | 2,100 | (2,000, 2,200) | 3            |

| Country       | Sex | Total YLL |                    | Premature cancer mortality |                    |    |       | Premature preventable cancer mortality |         |                    |    | Premature treatable cancer mortality |                |         |                    | Data Quality |       |                |        |
|---------------|-----|-----------|--------------------|----------------------------|--------------------|----|-------|----------------------------------------|---------|--------------------|----|--------------------------------------|----------------|---------|--------------------|--------------|-------|----------------|--------|
|               |     | N         | UI                 | N                          | UI                 | %  | ASR   | UI                                     | N       | UI                 | %  | ASR                                  | UI             | N       | UI                 | %            | ASR   | UI             | Method |
| Zambia        | M   | 428,600   | (398,900, 460,400) | 249,700                    | (232,400, 268,200) | 58 | 6,100 | (5,700, 6,500)                         | 160,500 | (149,400, 172,400) | 64 | 3,700                                | (3,500, 4,000) | 89,200  | (83,100, 95,900)   | 36           | 2,300 | (2,200, 2,500) | 3      |
|               | F   | 542,200   | (509,600, 576,900) | 391,600                    | (368,000, 416,700) | 72 | 8,100 | (7,600, 8,700)                         | 302,500 | (284,300, 321,800) | 77 | 6,300                                | (5,900, 6,700) | 89,100  | (83,800, 94,800)   | 23           | 1,800 | (1,700, 2,000) | 3      |
|               | B   | 351,100   | (327,400, 376,500) | 230,100                    | (214,600, 246,800) | 66 | 6,000 | (5,600, 6,400)                         | 166,200 | (155,000, 178,200) | 72 | 4,200                                | (4,000, 4,600) | 63,900  | (59,600, 68,600)   | 28           | 1,800 | (1,600, 1,900) | 3      |
|               | M   | 152,300   | (137,400, 168,800) | 86,200                     | (77,800, 95,600)   | 57 | 4,800 | (4,300, 5,300)                         | 55,500  | (50,100, 61,600)   | 64 | 2,800                                | (2,500, 3,100) | 30,700  | (27,700, 34,000)   | 36           | 2,000 | (1,800, 2,200) | 3      |
|               | F   | 198,800   | (180,700, 218,700) | 143,900                    | (130,800, 158,300) | 72 | 7,100 | (6,500, 7,800)                         | 110,700 | (100,600, 121,700) | 77 | 5,500                                | (5,000, 6,100) | 33,200  | (30,200, 36,600)   | 23           | 1,600 | (1,400, 1,700) | 3      |
|               | B   | 357,300   | (340,200, 375,400) | 243,700                    | (232,000, 256,000) | 68 | 7,100 | (6,800, 7,500)                         | 164,800 | (156,900, 173,100) | 68 | 4,800                                | (4,600, 5,100) | 78,900  | (75,100, 82,900)   | 32           | 2,300 | (2,200, 2,400) | 3      |
| Zimbabwe      | M   | 126,900   | (117,700, 136,700) | 77,000                     | (71,500, 83,000)   | 61 | 5,300 | (5,000, 5,800)                         | 46,300  | (43,000, 49,900)   | 60 | 3,200                                | (2,900, 3,400) | 30,700  | (28,500, 33,100)   | 40           | 2,200 | (2,000, 2,400) | 3      |
|               | F   | 230,500   | (215,900, 246,100) | 166,700                    | (156,100, 178,000) | 72 | 8,600 | (8,000, 9,200)                         | 118,500 | (111,000, 126,500) | 71 | 6,100                                | (5,800, 6,600) | 48,200  | (45,100, 51,400)   | 29           | 2,500 | (2,300, 2,600) | 3      |
| Middle Africa |     |           |                    |                            |                    |    |       |                                        |         |                    |    |                                      |                |         |                    |              |       |                |        |
| Angola        | B   | 475,100   | (438,400, 514,800) | 332,200                    | (306,500, 359,900) | 70 | 5,000 | (4,600, 5,400)                         | 200,900 | (185,400, 217,700) | 60 | 3,000                                | (2,800, 3,300) | 131,300 | (121,100, 142,200) | 40           | 2,000 | (1,800, 2,100) | 3      |
|               | M   | 201,300   | (176,400, 229,800) | 127,300                    | (111,500, 145,300) | 63 | 4,200 | (3,700, 4,800)                         | 65,700  | (57,500, 74,900)   | 52 | 2,100                                | (1,900, 2,400) | 61,700  | (54,000, 70,400)   | 48           | 2,100 | (1,800, 2,400) | 3      |
|               | F   | 273,800   | (247,500, 302,900) | 204,800                    | (185,200, 226,600) | 75 | 5,700 | (5,100, 6,300)                         | 135,200 | (122,200, 149,600) | 66 | 3,800                                | (3,500, 4,200) | 69,600  | (62,900, 77,000)   | 34           | 1,900 | (1,700, 2,100) | 3      |
| Cameroon      | B   | 567,200   | (521,300, 617,000) | 396,900                    | (364,800, 431,800) | 70 | 5,900 | (5,400, 6,400)                         | 240,800 | (221,300, 261,900) | 61 | 3,500                                | (3,200, 3,800) | 156,100 | (143,500, 169,900) | 39           | 2,400 | (2,200, 2,600) | 3      |
|               | M   | 231,500   | (203,000, 264,000) | 147,900                    | (129,700, 168,700) | 64 | 4,700 | (4,100, 5,400)                         | 82,500  | (72,300, 94,000)   | 56 | 2,400                                | (2,100, 2,800) | 65,500  | (57,400, 74,700)   | 44           | 2,300 | (2,000, 2,600) | 3      |
|               | F   | 335,700   | (300,800, 374,700) | 249,000                    | (223,100, 277,900) | 74 | 7,000 | (6,300, 7,900)                         | 158,300 | (141,800, 176,700) | 64 | 4,500                                | (4,100, 5,100) | 90,700  | (81,200, 101,200)  | 36           | 2,500 | (2,200, 2,800) | 3      |
|               | B   | 77,700    | (66,500, 90,700)   | 53,000                     | (45,400, 61,900)   | 68 | 5,000 | (4,300, 5,800)                         | 30,600  | (26,200, 35,700)   | 58 | 2,800                                | (2,400, 3,300) | 22,400  | (19,200, 26,200)   | 42           | 2,100 | (1,800, 2,500) | 3      |

| Country                       | Sex | Total YLL |                        | Premature cancer mortality |                    |    |       |                | Premature preventable cancer mortality |                    |    |       |                | Premature treatable cancer mortality |                    |    |       |                | Data Quality |
|-------------------------------|-----|-----------|------------------------|----------------------------|--------------------|----|-------|----------------|----------------------------------------|--------------------|----|-------|----------------|--------------------------------------|--------------------|----|-------|----------------|--------------|
|                               |     | N         | UI                     | N                          | UI                 | %  | ASR   | UI             | N                                      | UI                 | %  | ASR   | UI             | N                                    | UI                 | %  | ASR   | UI             | Method       |
| Central African Republic      | M   | 31,200    | (24,300, 40,100)       | 19,300                     | (15,000, 24,900)   | 62 | 4,000 | (3,100, 5,100) | 10,100                                 | (7,900, 13,000)    | 52 | 2,000 | (1,500, 2,500) | 9,200                                | (7,200, 11,900)    | 48 | 2,000 | (1,600, 2,600) | 3            |
|                               | F   | 46,500    | (38,200, 56,600)       | 33,700                     | (27,700, 41,000)   | 72 | 5,900 | (4,800, 7,200) | 20,500                                 | (16,800, 24,900)   | 61 | 3,600 | (3,000, 4,400) | 13,200                               | (10,800, 16,100)   | 39 | 2,300 | (1,900, 2,800) | 3            |
| Chad                          | B   | 247,800   | (212,300, 289,400)     | 166,500                    | (142,600, 194,400) | 67 | 5,000 | (4,300, 5,900) | 94,900                                 | (81,200, 110,800)  | 57 | 2,800 | (2,400, 3,300) | 71,600                               | (61,400, 83,600)   | 43 | 2,200 | (1,900, 2,500) | 3            |
|                               | M   | 100,700   | (78,300, 129,400)      | 61,300                     | (47,700, 78,700)   | 61 | 4,000 | (3,100, 5,100) | 31,500                                 | (24,500, 40,400)   | 51 | 2,000 | (1,500, 2,500) | 29,800                               | (23,200, 38,300)   | 49 | 2,000 | (1,500, 2,600) | 3            |
|                               | F   | 147,200   | (120,800, 179,200)     | 105,200                    | (86,400, 128,200)  | 71 | 6,000 | (5,000, 7,400) | 63,400                                 | (52,100, 77,200)   | 60 | 3,700 | (3,000, 4,500) | 41,800                               | (34,300, 50,900)   | 40 | 2,400 | (2,000, 2,900) | 3            |
| Congo                         | B   | 54,900    | (49,200, 61,300)       | 40,400                     | (36,200, 45,100)   | 74 | 3,000 | (2,700, 3,300) | 26,000                                 | (23,300, 29,000)   | 64 | 1,900 | (1,700, 2,100) | 14,400                               | (12,900, 16,000)   | 36 | 1,100 | (1,000, 1,300) | 3            |
|                               | M   | 24,800    | (21,100, 29,100)       | 16,700                     | (14,300, 19,700)   | 67 | 2,700 | (2,300, 3,200) | 10,000                                 | (8,500, 11,800)    | 60 | 1,500 | (1,200, 1,700) | 6,700                                | (5,700, 7,900)     | 40 | 1,300 | (1,100, 1,500) | 3            |
|                               | F   | 30,100    | (25,800, 35,000)       | 23,600                     | (20,300, 27,500)   | 79 | 3,300 | (2,800, 3,800) | 16,000                                 | (13,700, 18,600)   | 68 | 2,300 | (2,000, 2,600) | 7,600                                | (6,600, 8,900)     | 32 | 1,000 | (900, 1,200)   | 3            |
| Congo, Democratic Republic of | B   | 1,218,600 | (1,043,600, 1,422,800) | 816,000                    | (698,900, 952,800) | 67 | 4,200 | (3,600, 4,900) | 515,200                                | (441,200, 601,500) | 63 | 2,600 | (2,300, 3,100) | 300,800                              | (257,700, 351,300) | 37 | 1,600 | (1,300, 1,800) | 3            |
|                               | M   | 516,000   | (401,600, 663,000)     | 303,300                    | (236,000, 389,700) | 59 | 3,400 | (2,600, 4,300) | 164,000                                | (127,600, 210,700) | 54 | 1,700 | (1,300, 2,200) | 139,300                              | (108,400, 179,000) | 46 | 1,600 | (1,300, 2,100) | 3            |
|                               | F   | 702,600   | (576,900, 855,700)     | 512,700                    | (421,000, 624,400) | 73 | 5,100 | (4,200, 6,200) | 351,200                                | (288,400, 427,700) | 68 | 3,500 | (2,900, 4,300) | 161,500                              | (132,600, 196,700) | 32 | 1,500 | (1,300, 1,900) | 3            |
| Equatorial Guinea             | B   | 25,400    | (21,800, 29,700)       | 19,600                     | (16,800, 22,900)   | 77 | 5,500 | (4,700, 6,400) | 12,200                                 | (10,400, 14,200)   | 62 | 3,300 | (2,900, 3,900) | 7,400                                | (6,300, 8,700)     | 38 | 2,100 | (1,800, 2,500) | 3            |
|                               | M   | 12,100    | (9,400, 15,600)        | 9,100                      | (7,100, 11,800)    | 76 | 4,700 | (3,700, 6,000) | 5,400                                  | (4,200, 7,000)     | 59 | 2,600 | (2,000, 3,300) | 3,700                                | (2,900, 4,800)     | 41 | 2,100 | (1,700, 2,700) | 3            |
|                               | F   | 13,300    | (10,900, 16,200)       | 10,500                     | (8,600, 12,700)    | 79 | 6,600 | (5,400, 8,000) | 6,800                                  | (5,500, 8,200)     | 65 | 4,300 | (3,500, 5,300) | 3,700                                | (3,000, 4,500)     | 35 | 2,200 | (1,800, 2,700) | 3            |
| Gabon                         | B   | 38,500    | (33,000, 45,000)       | 30,700                     | (26,300, 35,800)   | 80 | 4,800 | (4,100, 5,600) | 19,700                                 | (16,900, 23,000)   | 64 | 3,100 | (2,600, 3,600) | 11,000                               | (9,400, 12,800)    | 36 | 1,700 | (1,500, 2,000) | 3            |
|                               | M   | 17,400    | (13,500, 22,300)       | 13,700                     | (10,700, 17,700)   | 79 | 4,300 | (3,300, 5,500) | 8,500                                  | (6,600, 10,900)    | 62 | 2,500 | (2,000, 3,200) | 5,300                                | (4,100, 6,800)     | 38 | 1,700 | (1,400, 2,200) | 3            |

| Country               | Sex | Total YLL |                        | Premature cancer mortality |                        |    |       | Premature preventable cancer mortality |           |                        |    | Premature treatable cancer mortality |                 |         |                    | Data Quality |       |                |        |
|-----------------------|-----|-----------|------------------------|----------------------------|------------------------|----|-------|----------------------------------------|-----------|------------------------|----|--------------------------------------|-----------------|---------|--------------------|--------------|-------|----------------|--------|
|                       |     | N         | UI                     | N                          | UI                     | %  | ASR   | UI                                     | N         | UI                     | %  | ASR                                  | UI              | N       | UI                 | %            | ASR   | UI             | Method |
| Sao Tome and Principe | F   | 21,200    | (17,400, 25,800)       | 16,900                     | (13,900, 20,600)       | 80 | 5,400 | (4,400, 6,500)                         | 11,300    | (9,200, 13,700)        | 66 | 3,600                                | (3,000, 4,400)  | 5,700   | (4,700, 6,900)     | 34           | 1,800 | (1,400, 2,100) | 3      |
|                       | B   | 3,300     | (1,500, 7,200)         | 2,700                      | (1,200, 5,900)         | 81 | 5,100 | (2,300, 11,100)                        | 2,100     | (1,000, 4,500)         | 76 | 3,700                                | (1,700, 8,100)  | 600     | (300, 1,400)       | 24           | 1,400 | (600, 2,900)   | 2a     |
|                       | M   | 1,700     | (500, 5,200)           | 1,500                      | (500, 4,500)           | 87 | 5,900 | (1,900, 18,200)                        | 1,200     | (400, 3,600)           | 80 | 4,400                                | (1,400, 13,600) | 300     | (100, 900)         | 20           | 1,500 | (500, 4,600)   | 2a     |
|                       | F   | 1,600     | (600, 4,800)           | 1,200                      | (400, 3,600)           | 76 | 4,400 | (1,500, 12,800)                        | 900       | (300, 2,600)           | 72 | 3,100                                | (1,100, 9,100)  | 300     | (100, 1,000)       | 28           | 1,300 | (400, 3,700)   | 2a     |
| Northern Africa       |     |           |                        |                            |                        |    |       |                                        |           |                        |    |                                      |                 |         |                    |              |       |                |        |
| Algeria               | B   | 982,300   | (954,500, 1,010,800)   | 716,300                    | (696,100, 737,200)     | 73 | 4,200 | (4,100, 4,400)                         | 396,200   | (385,000, 407,700)     | 55 | 2,400                                | (2,300, 2,400)  | 320,200 | (311,100, 329,500) | 45           | 1,900 | (1,800, 1,900) | 3      |
|                       | M   | 488,500   | (467,800, 510,200)     | 332,500                    | (318,400, 347,300)     | 68 | 4,000 | (3,900, 4,200)                         | 193,800   | (185,600, 202,400)     | 58 | 2,400                                | (2,300, 2,500)  | 138,700 | (132,800, 144,900) | 42           | 1,700 | (1,600, 1,700) | 3      |
|                       | F   | 493,700   | (475,200, 513,000)     | 383,800                    | (369,400, 398,800)     | 78 | 4,500 | (4,300, 4,600)                         | 202,400   | (194,800, 210,300)     | 53 | 2,400                                | (2,300, 2,500)  | 181,400 | (174,600, 188,500) | 47           | 2,100 | (2,000, 2,200) | 3      |
| Egypt                 | B   | 2,699,900 | (2,631,100, 2,770,500) | 1,944,700                  | (1,895,100, 1,995,600) | 72 | 5,800 | (5,600, 5,900)                         | 1,344,800 | (1,310,500, 1,380,000) | 69 | 4,000                                | (3,900, 4,100)  | 599,900 | (584,600, 615,600) | 31           | 1,700 | (1,700, 1,800) | 3      |
|                       | M   | 1,502,900 | (1,449,800, 1,557,800) | 1,110,300                  | (1,071,100, 1,150,900) | 74 | 6,700 | (6,500, 7,000)                         | 829,500   | (800,200, 859,800)     | 75 | 5,100                                | (4,900, 5,200)  | 280,800 | (270,900, 291,100) | 25           | 1,700 | (1,600, 1,700) | 3      |
|                       | F   | 1,197,000 | (1,153,400, 1,242,300) | 834,400                    | (804,000, 866,000)     | 70 | 4,800 | (4,600, 5,000)                         | 515,400   | (496,600, 534,900)     | 62 | 3,000                                | (2,900, 3,100)  | 319,100 | (307,400, 331,100) | 38           | 1,800 | (1,700, 1,900) | 3      |
| Libya                 | B   | 143,300   | (132,100, 155,300)     | 104,400                    | (96,300, 113,200)      | 73 | 4,200 | (3,900, 4,500)                         | 60,500    | (55,800, 65,600)       | 58 | 2,500                                | (2,300, 2,700)  | 43,900  | (40,500, 47,600)   | 42           | 1,700 | (1,600, 1,900) | 3      |
|                       | M   | 72,000    | (64,400, 80,500)       | 49,800                     | (44,500, 55,700)       | 69 | 4,300 | (3,800, 4,800)                         | 31,700    | (28,400, 35,500)       | 64 | 2,800                                | (2,500, 3,100)  | 18,100  | (16,100, 20,200)   | 36           | 1,500 | (1,300, 1,700) | 3      |
|                       | F   | 71,300    | (63,400, 80,200)       | 54,600                     | (48,600, 61,400)       | 77 | 4,200 | (3,700, 4,700)                         | 28,700    | (25,600, 32,300)       | 53 | 2,200                                | (2,000, 2,500)  | 25,900  | (23,000, 29,100)   | 47           | 1,900 | (1,700, 2,200) | 3      |
| Morocco               | B   | 1,044,400 | (1,007,400, 1,082,800) | 777,800                    | (750,300, 806,400)     | 74 | 4,900 | (4,700, 5,000)                         | 485,500   | (468,300, 503,300)     | 62 | 3,000                                | (2,900, 3,100)  | 292,400 | (282,000, 303,100) | 38           | 1,800 | (1,800, 1,900) | 3      |
|                       | M   | 580,500   | (550,100, 612,600)     | 420,600                    | (398,500, 443,800)     | 72 | 5,400 | (5,100, 5,700)                         | 282,400   | (267,600, 298,000)     | 67 | 3,600                                | (3,400, 3,800)  | 138,100 | (130,900, 145,800) | 33           | 1,800 | (1,700, 1,900) | 3      |

| Country         | Sex | Total YLL |                    | Premature cancer mortality |                    |    |       |                | Premature preventable cancer mortality |                    |    |       |                | Premature treatable cancer mortality |                    |    |       |                | Data Quality |
|-----------------|-----|-----------|--------------------|----------------------------|--------------------|----|-------|----------------|----------------------------------------|--------------------|----|-------|----------------|--------------------------------------|--------------------|----|-------|----------------|--------------|
|                 |     | N         | UI                 | N                          | UI                 | %  | ASR   | UI             | N                                      | UI                 | %  | ASR   | UI             | N                                    | UI                 | %  | ASR   | UI             | Method       |
| Sudan           | F   | 463,900   | (441,900, 487,100) | 357,300                    | (340,300, 375,100) | 77 | 4,300 | (4,100, 4,500) | 203,000                                | (193,400, 213,200) | 57 | 2,500 | (2,300, 2,600) | 154,200                              | (146,900, 161,900) | 43 | 1,900 | (1,800, 2,000) | 3            |
|                 | B   | 614,200   | (597,800, 631,000) | 419,900                    | (408,700, 431,400) | 68 | 3,700 | (3,600, 3,800) | 225,900                                | (219,900, 232,100) | 54 | 2,000 | (1,900, 2,100) | 194,000                              | (188,800, 199,300) | 46 | 1,700 | (1,600, 1,700) | 3            |
|                 | M   | 262,200   | (250,700, 274,400) | 163,800                    | (156,500, 171,400) | 62 | 3,000 | (2,900, 3,200) | 87,300                                 | (83,400, 91,300)   | 53 | 1,600 | (1,600, 1,700) | 76,500                               | (73,100, 80,000)   | 47 | 1,400 | (1,300, 1,500) | 3            |
|                 | F   | 351,900   | (340,200, 364,000) | 256,100                    | (247,600, 264,900) | 73 | 4,300 | (4,200, 4,400) | 138,600                                | (134,000, 143,400) | 54 | 2,400 | (2,300, 2,400) | 117,500                              | (113,600, 121,500) | 46 | 1,900 | (1,900, 2,000) | 3            |
| Tunisia         | B   | 313,500   | (301,500, 325,800) | 216,600                    | (208,400, 225,100) | 69 | 3,800 | (3,700, 4,000) | 134,800                                | (129,700, 140,200) | 62 | 2,400 | (2,300, 2,500) | 81,700                               | (78,600, 85,000)   | 38 | 1,400 | (1,400, 1,500) | 3            |
|                 | M   | 185,500   | (176,000, 195,500) | 126,600                    | (120,200, 133,400) | 68 | 4,600 | (4,400, 4,800) | 84,700                                 | (80,400, 89,200)   | 67 | 3,100 | (2,900, 3,200) | 41,900                               | (39,800, 44,200)   | 33 | 1,500 | (1,400, 1,600) | 3            |
|                 | F   | 128,000   | (120,800, 135,600) | 90,000                     | (84,900, 95,300)   | 70 | 3,100 | (2,900, 3,200) | 50,200                                 | (47,400, 53,100)   | 56 | 1,700 | (1,600, 1,800) | 39,800                               | (37,600, 42,200)   | 44 | 1,400 | (1,300, 1,400) | 3            |
| Southern Africa |     |           |                    |                            |                    |    |       |                |                                        |                    |    |       |                |                                      |                    |    |       |                |              |
| Botswana        | B   | 39,700    | (37,000, 42,600)   | 29,000                     | (27,000, 31,100)   | 73 | 3,600 | (3,400, 3,900) | 19,500                                 | (18,200, 21,000)   | 67 | 2,400 | (2,300, 2,600) | 9,400                                | (8,800, 10,100)    | 33 | 1,200 | (1,100, 1,300) | 3            |
|                 | M   | 16,900    | (15,000, 19,100)   | 11,500                     | (10,200, 13,000)   | 68 | 3,400 | (3,000, 3,800) | 6,900                                  | (6,200, 7,800)     | 60 | 2,000 | (1,700, 2,200) | 4,600                                | (4,100, 5,200)     | 40 | 1,400 | (1,200, 1,600) | 3            |
|                 | F   | 22,800    | (20,900, 24,800)   | 17,400                     | (16,000, 19,000)   | 77 | 3,900 | (3,600, 4,300) | 12,600                                 | (11,500, 13,800)   | 72 | 2,800 | (2,600, 3,100) | 4,800                                | (4,400, 5,300)     | 28 | 1,100 | (1,000, 1,200) | 3            |
| Eswatini        | B   | 23,200    | (21,200, 25,400)   | 18,200                     | (16,600, 19,900)   | 78 | 5,900 | (5,400, 6,400) | 13,900                                 | (12,800, 15,300)   | 77 | 4,400 | (4,000, 4,800) | 4,300                                | (3,900, 4,700)     | 23 | 1,500 | (1,300, 1,600) | 3            |
|                 | M   | 7,900     | (6,800, 9,200)     | 5,600                      | (4,800, 6,500)     | 71 | 3,900 | (3,300, 4,500) | 3,600                                  | (3,000, 4,100)     | 63 | 2,300 | (2,000, 2,700) | 2,100                                | (1,800, 2,400)     | 37 | 1,600 | (1,300, 1,800) | 3            |
|                 | F   | 15,300    | (13,700, 17,100)   | 12,600                     | (11,300, 14,100)   | 82 | 7,900 | (7,000, 8,800) | 10,400                                 | (9,300, 11,600)    | 83 | 6,500 | (5,800, 7,300) | 2,200                                | (2,000, 2,500)     | 17 | 1,400 | (1,200, 1,500) | 3            |
| Lesotho         | B   | 45,000    | (41,200, 49,300)   | 34,400                     | (31,400, 37,600)   | 76 | 4,900 | (4,500, 5,400) | 26,200                                 | (23,900, 28,700)   | 76 | 3,700 | (3,400, 4,100) | 8,200                                | (7,500, 9,000)     | 24 | 1,200 | (1,100, 1,300) | 3            |
|                 | M   | 15,700    | (13,500, 18,300)   | 11,500                     | (9,800, 13,400)    | 73 | 3,700 | (3,100, 4,300) | 7,600                                  | (6,500, 8,900)     | 66 | 2,300 | (2,000, 2,700) | 3,800                                | (3,300, 4,500)     | 34 | 1,300 | (1,100, 1,500) | 3            |

| Country                | Sex | Total YLL |                        | Premature cancer mortality |                        |    |       |                | Premature preventable cancer mortality |                    |    |       |                | Premature treatable cancer mortality |                    |    |       |                | Data Quality |
|------------------------|-----|-----------|------------------------|----------------------------|------------------------|----|-------|----------------|----------------------------------------|--------------------|----|-------|----------------|--------------------------------------|--------------------|----|-------|----------------|--------------|
|                        |     | N         | UI                     | N                          | UI                     | %  | ASR   | UI             | N                                      | UI                 | %  | ASR   | UI             | N                                    | UI                 | %  | ASR   | UI             | Method       |
| Namibia                | F   | 29,300    | (26,300, 32,800)       | 22,900                     | (20,500, 25,600)       | 78 | 6,100 | (5,500, 6,900) | 18,600                                 | (16,600, 20,800)   | 81 | 5,000 | (4,500, 5,600) | 4,300                                | (3,900, 4,900)     | 19 | 1,100 | (1,000, 1,300) | 3            |
|                        | B   | 66,700    | (63,400, 70,200)       | 49,600                     | (47,200, 52,200)       | 74 | 7,000 | (6,700, 7,400) | 28,900                                 | (27,400, 30,400)   | 58 | 4,000 | (3,800, 4,200) | 20,800                               | (19,700, 21,900)   | 42 | 3,000 | (2,900, 3,200) | 3            |
|                        | M   | 28,200    | (26,100, 30,500)       | 19,800                     | (18,300, 21,400)       | 70 | 6,600 | (6,100, 7,100) | 10,500                                 | (9,700, 11,400)    | 53 | 3,400 | (3,100, 3,600) | 9,300                                | (8,600, 10,000)    | 47 | 3,200 | (3,000, 3,500) | 3            |
|                        | F   | 38,500    | (36,000, 41,200)       | 29,800                     | (27,900, 31,900)       | 78 | 7,500 | (7,000, 8,000) | 18,300                                 | (17,200, 19,600)   | 61 | 4,600 | (4,300, 4,900) | 11,500                               | (10,800, 12,300)   | 39 | 2,900 | (2,700, 3,100) | 3            |
| South African Republic | B   | 1,819,200 | (1,799,500, 1,839,100) | 1,389,300                  | (1,374,300, 1,404,500) | 76 | 6,300 | (6,200, 6,400) | 923,500                                | (913,500, 933,600) | 66 | 4,200 | (4,100, 4,200) | 465,800                              | (460,800, 470,900) | 34 | 2,100 | (2,100, 2,200) | 1            |
|                        | M   | 844,700   | (831,700, 858,000)     | 632,500                    | (622,700, 642,400)     | 75 | 6,400 | (6,300, 6,500) | 401,100                                | (394,900, 407,400) | 63 | 4,100 | (4,000, 4,100) | 231,400                              | (227,800, 235,000) | 37 | 2,400 | (2,300, 2,400) | 1            |
|                        | F   | 974,500   | (959,700, 989,400)     | 756,900                    | (745,400, 768,500)     | 78 | 6,300 | (6,200, 6,400) | 522,400                                | (514,500, 530,400) | 69 | 4,400 | (4,300, 4,400) | 234,400                              | (230,900, 238,000) | 31 | 2,000 | (1,900, 2,000) | 1            |
| Benin                  | B   | 161,700   | (141,000, 185,500)     | 114,300                    | (99,700, 131,100)      | 71 | 4,000 | (3,500, 4,600) | 64,800                                 | (56,500, 74,400)   | 57 | 2,300 | (2,000, 2,600) | 49,500                               | (43,100, 56,800)   | 43 | 1,700 | (1,500, 2,000) | 3            |
|                        | M   | 71,200    | (57,600, 88,000)       | 45,900                     | (37,200, 56,800)       | 65 | 3,500 | (2,800, 4,300) | 26,000                                 | (21,000, 32,100)   | 57 | 1,900 | (1,500, 2,400) | 19,900                               | (16,100, 24,600)   | 43 | 1,600 | (1,300, 1,900) | 3            |
|                        | F   | 90,500    | (75,600, 108,300)      | 68,400                     | (57,200, 81,900)       | 76 | 4,500 | (3,700, 5,400) | 38,900                                 | (32,500, 46,500)   | 57 | 2,600 | (2,200, 3,100) | 29,500                               | (24,700, 35,400)   | 43 | 1,900 | (1,600, 2,200) | 3            |
| Burkina Faso           | B   | 349,900   | (307,800, 397,700)     | 243,500                    | (214,200, 276,800)     | 70 | 5,200 | (4,600, 6,000) | 148,600                                | (130,800, 169,000) | 61 | 3,200 | (2,800, 3,600) | 94,800                               | (83,400, 107,800)  | 39 | 2,100 | (1,800, 2,300) | 3            |
|                        | M   | 132,500   | (111,500, 157,600)     | 82,900                     | (69,700, 98,500)       | 63 | 3,900 | (3,300, 4,600) | 51,900                                 | (43,600, 61,700)   | 63 | 2,300 | (1,900, 2,700) | 31,000                               | (26,000, 36,800)   | 37 | 1,600 | (1,300, 1,900) | 3            |
|                        | F   | 217,300   | (179,600, 263,000)     | 160,600                    | (132,700, 194,300)     | 74 | 6,400 | (5,300, 7,800) | 96,700                                 | (80,000, 117,100)  | 60 | 3,900 | (3,200, 4,800) | 63,800                               | (52,800, 77,300)   | 40 | 2,500 | (2,100, 3,000) | 3            |
| Western Africa         |     |           |                        |                            |                        |    |       |                |                                        |                    |    |       |                |                                      |                    |    |       |                |              |
| Cape Verde             | B   | 13,600    | (11,900, 15,500)       | 10,000                     | (8,800, 11,400)        | 74 | 5,200 | (4,500, 5,900) | 6,600                                  | (5,800, 7,600)     | 66 | 3,400 | (3,000, 3,900) | 3,400                                | (3,000, 3,900)     | 34 | 1,700 | (1,500, 2,000) | 2a           |
|                        | M   | 7,600     | (6,400, 9,100)         | 5,900                      | (4,900, 7,000)         | 77 | 6,500 | (5,400, 7,700) | 4,000                                  | (3,300, 4,800)     | 68 | 4,400 | (3,700, 5,200) | 1,900                                | (1,600, 2,300)     | 32 | 2,100 | (1,700, 2,500) | 2a           |

| Country       | Sex | Total YLL |                    | Premature cancer mortality |                    |    |       | Premature preventable cancer mortality |         |                    |    |       | Premature treatable cancer mortality |         |                    |    |       | Data Quality   |        |
|---------------|-----|-----------|--------------------|----------------------------|--------------------|----|-------|----------------------------------------|---------|--------------------|----|-------|--------------------------------------|---------|--------------------|----|-------|----------------|--------|
|               |     | N         | UI                 | N                          | UI                 | %  | ASR   | UI                                     | N       | UI                 | %  | ASR   | UI                                   | N       | UI                 | %  | ASR   | UI             | Method |
| Cote d'Ivoire | F   | 6,000     | (4,900, 7,300)     | 4,200                      | (3,400, 5,100)     | 70 | 4,100 | (3,300, 5,000)                         | 2,600   | (2,200, 3,200)     | 64 | 2,600 | (2,100, 3,200)                       | 1,500   | (1,200, 1,800)     | 36 | 1,500 | (1,200, 1,800) | 2a     |
|               | B   | 417,300   | (394,900, 441,000) | 287,200                    | (271,800, 303,600) | 69 | 4,700 | (4,400, 4,900)                         | 169,100 | (160,000, 178,700) | 59 | 2,700 | (2,600, 2,900)                       | 118,100 | (111,800, 124,800) | 41 | 1,900 | (1,800, 2,000) | 3      |
|               | M   | 172,600   | (158,400, 188,000) | 104,300                    | (95,800, 113,600)  | 60 | 3,400 | (3,100, 3,700)                         | 53,900  | (49,500, 58,700)   | 52 | 1,700 | (1,500, 1,800)                       | 50,400  | (46,300, 54,900)   | 48 | 1,700 | (1,500, 1,800) | 3      |
|               | F   | 244,700   | (227,600, 263,100) | 182,900                    | (170,200, 196,700) | 75 | 6,100 | (5,700, 6,600)                         | 115,200 | (107,200, 123,900) | 63 | 3,900 | (3,700, 4,200)                       | 67,700  | (63,000, 72,800)   | 37 | 2,200 | (2,000, 2,400) | 3      |
| Ghana         | B   | 610,100   | (550,300, 676,300) | 436,100                    | (393,400, 483,500) | 71 | 4,700 | (4,300, 5,300)                         | 280,600 | (253,100, 311,100) | 64 | 3,100 | (2,800, 3,400)                       | 155,500 | (140,300, 172,400) | 36 | 1,700 | (1,500, 1,900) | 3      |
|               | M   | 279,300   | (236,100, 330,400) | 188,300                    | (159,200, 222,800) | 67 | 4,100 | (3,500, 4,900)                         | 123,000 | (104,000, 145,600) | 65 | 2,600 | (2,200, 3,100)                       | 65,300  | (55,200, 77,200)   | 35 | 1,500 | (1,300, 1,800) | 3      |
|               | F   | 330,800   | (290,300, 376,900) | 247,800                    | (217,500, 282,400) | 75 | 5,300 | (4,700, 6,100)                         | 157,600 | (138,300, 179,600) | 64 | 3,500 | (3,000, 3,900)                       | 90,200  | (79,200, 102,800)  | 36 | 1,900 | (1,600, 2,100) | 3      |
| Guinea        | B   | 209,600   | (194,500, 225,800) | 158,300                    | (147,000, 170,600) | 76 | 5,700 | (5,300, 6,100)                         | 124,400 | (115,500, 134,100) | 79 | 4,500 | (4,200, 4,800)                       | 33,900  | (31,500, 36,500)   | 21 | 1,200 | (1,100, 1,300) | 3      |
|               | M   | 74,500    | (66,200, 83,900)   | 49,600                     | (44,100, 55,900)   | 67 | 4,500 | (4,000, 5,100)                         | 37,500  | (33,300, 42,200)   | 76 | 3,400 | (3,000, 3,800)                       | 12,100  | (10,700, 13,600)   | 24 | 1,100 | (1,000, 1,200) | 3      |
|               | F   | 135,100   | (122,700, 148,600) | 108,700                    | (98,800, 119,600)  | 80 | 6,500 | (5,900, 7,200)                         | 86,900  | (79,000, 95,600)   | 80 | 5,200 | (4,800, 5,800)                       | 21,800  | (19,800, 24,000)   | 20 | 1,300 | (1,200, 1,400) | 3      |
| Guinea-Bissau | B   | 30,300    | (24,600, 37,300)   | 23,700                     | (19,200, 29,200)   | 78 | 5,300 | (4,300, 6,600)                         | 16,900  | (13,700, 20,800)   | 71 | 3,800 | (3,100, 4,700)                       | 6,800   | (5,500, 8,400)     | 29 | 1,500 | (1,200, 1,900) | 3      |
|               | M   | 11,200    | (8,000, 15,700)    | 8,200                      | (5,900, 11,500)    | 73 | 4,200 | (3,000, 5,900)                         | 5,600   | (4,000, 7,800)     | 68 | 2,800 | (2,000, 4,000)                       | 2,600   | (1,900, 3,700)     | 32 | 1,400 | (1,000, 2,000) | 3      |
|               | F   | 19,000    | (14,600, 24,800)   | 15,500                     | (11,900, 20,200)   | 81 | 6,300 | (4,800, 8,200)                         | 11,300  | (8,700, 14,800)    | 73 | 4,600 | (3,600, 6,000)                       | 4,200   | (3,200, 5,400)     | 27 | 1,700 | (1,300, 2,200) | 3      |
| Liberia       | B   | 90,000    | (73,100, 110,800)  | 66,500                     | (54,000, 81,900)   | 74 | 5,200 | (4,200, 6,400)                         | 46,700  | (38,000, 57,500)   | 70 | 3,700 | (3,000, 4,500)                       | 19,800  | (16,100, 24,400)   | 30 | 1,600 | (1,300, 1,900) | 3      |
|               | M   | 35,700    | (25,500, 49,900)   | 23,500                     | (16,800, 32,800)   | 66 | 3,900 | (2,800, 5,500)                         | 15,700  | (11,200, 22,000)   | 67 | 2,500 | (1,800, 3,600)                       | 7,700   | (5,500, 10,800)    | 33 | 1,400 | (1,000, 1,900) | 3      |
|               | F   | 54,300    | (41,700, 70,800)   | 43,100                     | (33,000, 56,100)   | 79 | 6,500 | (5,000, 8,400)                         | 31,000  | (23,800, 40,400)   | 72 | 4,700 | (3,600, 6,100)                       | 12,100  | (9,300, 15,700)    | 28 | 1,800 | (1,400, 2,300) | 3      |

| Country      | Sex | Total YLL |                        | Premature cancer mortality |                        |    |       |                | Premature preventable cancer mortality |                        |    |       |                | Premature treatable cancer mortality |                      |    |       |                | Data Quality |
|--------------|-----|-----------|------------------------|----------------------------|------------------------|----|-------|----------------|----------------------------------------|------------------------|----|-------|----------------|--------------------------------------|----------------------|----|-------|----------------|--------------|
|              |     | N         | UI                     | N                          | UI                     | %  | ASR   | UI             | N                                      | UI                     | %  | ASR   | UI             | N                                    | UI                   | %  | ASR   | UI             | Method       |
| Mali         | B   | 404,700   | (377,300, 434,100)     | 276,000                    | (257,300, 296,100)     | 68 | 6,700 | (6,300, 7,200) | 179,300                                | (167,100, 192,300)     | 65 | 4,400 | (4,100, 4,700) | 96,800                               | (90,200, 103,800)    | 35 | 2,300 | (2,200, 2,500) | 3            |
|              | M   | 151,700   | (135,900, 169,500)     | 88,100                     | (78,900, 98,400)       | 58 | 4,800 | (4,300, 5,300) | 55,900                                 | (50,100, 62,400)       | 63 | 3,000 | (2,700, 3,400) | 32,200                               | (28,800, 35,900)     | 37 | 1,800 | (1,600, 2,000) | 3            |
|              | F   | 252,900   | (231,000, 277,000)     | 188,000                    | (171,600, 205,800)     | 74 | 8,500 | (7,800, 9,300) | 123,400                                | (112,700, 135,100)     | 66 | 5,700 | (5,200, 6,200) | 64,600                               | (59,000, 70,700)     | 34 | 2,900 | (2,600, 3,100) | 3            |
| Mauritania   | B   | 77,400    | (62,900, 95,300)       | 58,100                     | (47,200, 71,500)       | 75 | 4,800 | (3,900, 6,000) | 35,800                                 | (29,100, 44,100)       | 62 | 3,000 | (2,400, 3,700) | 22,300                               | (18,100, 27,500)     | 38 | 1,800 | (1,500, 2,300) | 3            |
|              | M   | 31,400    | (22,400, 43,900)       | 21,300                     | (15,200, 29,800)       | 68 | 3,700 | (2,700, 5,200) | 12,300                                 | (8,800, 17,200)        | 58 | 2,100 | (1,500, 3,000) | 9,000                                | (6,400, 12,600)      | 42 | 1,600 | (1,200, 2,300) | 3            |
|              | F   | 46,000    | (35,300, 60,000)       | 36,800                     | (28,200, 48,000)       | 80 | 5,900 | (4,500, 7,700) | 23,500                                 | (18,000, 30,600)       | 64 | 3,800 | (2,900, 5,000) | 13,300                               | (10,200, 17,300)     | 36 | 2,100 | (1,600, 2,700) | 3            |
| Niger        | B   | 304,000   | (246,900, 374,400)     | 199,700                    | (162,200, 245,800)     | 66 | 4,100 | (3,400, 5,100) | 118,800                                | (96,500, 146,300)      | 59 | 2,500 | (2,000, 3,000) | 80,900                               | (65,700, 99,600)     | 41 | 1,700 | (1,300, 2,000) | 3            |
|              | M   | 141,300   | (100,900, 197,700)     | 82,300                     | (58,800, 115,200)      | 58 | 3,500 | (2,500, 4,900) | 51,300                                 | (36,600, 71,800)       | 62 | 2,200 | (1,600, 3,000) | 31,000                               | (22,200, 43,400)     | 38 | 1,300 | (900, 1,800)   | 3            |
|              | F   | 162,800   | (124,900, 212,100)     | 117,400                    | (90,100, 153,000)      | 72 | 4,800 | (3,600, 6,200) | 67,500                                 | (51,800, 88,000)       | 58 | 2,800 | (2,100, 3,600) | 49,900                               | (38,300, 65,000)     | 42 | 2,000 | (1,500, 2,600) | 3            |
| Nigeria      | B   | 2,932,900 | (2,759,500, 3,117,200) | 2,106,900                  | (1,982,300, 2,239,300) | 72 | 4,400 | (4,100, 4,700) | 1,100,300                              | (1,035,200, 1,169,400) | 52 | 2,200 | (2,100, 2,400) | 1,006,600                            | (947,100, 1,069,900) | 48 | 2,100 | (2,000, 2,300) | 3            |
|              | M   | 1,211,700 | (1,100,600, 1,334,000) | 800,500                    | (727,100, 881,300)     | 66 | 3,600 | (3,200, 3,900) | 322,200                                | (292,600, 354,700)     | 40 | 1,400 | (1,300, 1,600) | 478,300                              | (434,500, 526,600)   | 60 | 2,200 | (2,000, 2,400) | 3            |
|              | F   | 1,721,200 | (1,590,800, 1,862,300) | 1,306,400                  | (1,207,400, 1,413,500) | 76 | 5,200 | (4,800, 5,600) | 778,100                                | (719,200, 841,900)     | 60 | 3,100 | (2,800, 3,300) | 528,200                              | (488,200, 571,600)   | 40 | 2,100 | (2,000, 2,300) | 3            |
| Senegal      | B   | 288,700   | (234,400, 355,400)     | 211,800                    | (172,000, 260,800)     | 73 | 5,500 | (4,400, 6,700) | 142,300                                | (115,600, 175,300)     | 67 | 3,700 | (3,000, 4,600) | 69,500                               | (56,400, 85,500)     | 33 | 1,800 | (1,400, 2,200) | 3            |
|              | M   | 105,800   | (75,600, 148,100)      | 67,000                     | (47,900, 93,800)       | 63 | 4,100 | (2,900, 5,700) | 43,600                                 | (31,100, 61,000)       | 65 | 2,600 | (1,900, 3,700) | 23,500                               | (16,800, 32,800)     | 35 | 1,400 | (1,000, 2,000) | 3            |
|              | F   | 182,800   | (140,300, 238,300)     | 144,800                    | (111,100, 188,700)     | 79 | 6,600 | (5,100, 8,600) | 98,800                                 | (75,800, 128,700)      | 68 | 4,500 | (3,500, 5,900) | 46,000                               | (35,300, 60,000)     | 32 | 2,000 | (1,600, 2,700) | 3            |
| Sierra Leone | B   | 129,100   | (125,300, 133,100)     | 94,900                     | (92,100, 97,900)       | 74 | 4,900 | (4,800, 5,100) | 57,400                                 | (55,700, 59,200)       | 60 | 3,000 | (2,900, 3,100) | 37,500                               | (36,400, 38,700)     | 40 | 1,900 | (1,900, 2,000) | 3            |



| Country    | Sex | Total YLL |                    | Premature cancer mortality |                    |    |       |                | Premature preventable cancer mortality |                    |    |       |                | Premature treatable cancer mortality |                    |    |       |                | Data Quality |
|------------|-----|-----------|--------------------|----------------------------|--------------------|----|-------|----------------|----------------------------------------|--------------------|----|-------|----------------|--------------------------------------|--------------------|----|-------|----------------|--------------|
|            |     | N         | UI                 | N                          | UI                 | %  | ASR   | UI             | N                                      | UI                 | %  | ASR   | UI             | N                                    | UI                 | %  | ASR   | UI             | Method       |
| The Gambia | M   | 51,000    | (48,600, 53,500)   | 33,000                     | (31,500, 34,600)   | 65 | 3,700 | (3,500, 3,900) | 19,400                                 | (18,500, 20,300)   | 59 | 2,100 | (2,000, 2,200) | 13,600                               | (13,000, 14,300)   | 41 | 1,600 | (1,500, 1,700) | 3            |
|            | F   | 78,200    | (75,200, 81,300)   | 61,900                     | (59,500, 64,400)   | 79 | 6,200 | (5,900, 6,400) | 38,000                                 | (36,500, 39,500)   | 61 | 3,800 | (3,700, 4,000) | 23,900                               | (23,000, 24,900)   | 39 | 2,300 | (2,200, 2,400) | 3            |
|            | B   | 32,700    | (28,500, 37,600)   | 20,700                     | (18,000, 23,700)   | 63 | 3,700 | (3,200, 4,200) | 17,300                                 | (15,100, 19,900)   | 84 | 3,100 | (2,700, 3,500) | 3,400                                | (2,900, 3,900)     | 16 | 600   | (600, 700)     | 3            |
|            | M   | 16,400    | (13,600, 19,700)   | 10,000                     | (8,300, 12,000)    | 61 | 3,700 | (3,100, 4,400) | 8,400                                  | (6,900, 10,000)    | 84 | 3,000 | (2,500, 3,600) | 1,600                                | (1,300, 1,900)     | 16 | 700   | (600, 800)     | 3            |
|            | F   | 16,400    | (13,300, 20,200)   | 10,700                     | (8,700, 13,200)    | 65 | 3,700 | (3,000, 4,500) | 9,000                                  | (7,300, 11,000)    | 84 | 3,100 | (2,500, 3,800) | 1,800                                | (1,400, 2,200)     | 16 | 600   | (500, 800)     | 3            |
|            | B   | 125,600   | (115,100, 137,200) | 89,800                     | (82,200, 98,000)   | 71 | 4,400 | (4,000, 4,800) | 50,700                                 | (46,500, 55,400)   | 57 | 2,500 | (2,300, 2,700) | 39,000                               | (35,800, 42,600)   | 43 | 1,900 | (1,800, 2,100) | 3            |
| Togo       | M   | 54,900    | (48,400, 62,400)   | 35,100                     | (30,900, 39,900)   | 64 | 3,700 | (3,300, 4,200) | 18,400                                 | (16,200, 20,900)   | 52 | 1,900 | (1,700, 2,100) | 16,700                               | (14,700, 19,000)   | 48 | 1,800 | (1,600, 2,100) | 3            |
|            | F   | 70,700    | (62,600, 79,800)   | 54,700                     | (48,400, 61,700)   | 77 | 5,000 | (4,500, 5,700) | 32,300                                 | (28,600, 36,500)   | 59 | 3,000 | (2,700, 3,400) | 22,300                               | (19,800, 25,200)   | 41 | 2,000 | (1,800, 2,300) | 3            |
|            | B   | 12,500    | (11,000, 14,200)   | 9,200                      | (8,100, 10,400)    | 73 | 4,800 | (4,300, 5,500) | 5,200                                  | (4,600, 5,900)     | 56 | 2,700 | (2,400, 3,100) | 4,000                                | (3,500, 4,500)     | 44 | 2,100 | (1,900, 2,400) | 1            |
| Bahamas    | M   | 5,600     | (4,700, 6,700)     | 3,600                      | (3,000, 4,400)     | 65 | 4,100 | (3,400, 5,000) | 1,900                                  | (1,600, 2,300)     | 53 | 2,100 | (1,800, 2,600) | 1,700                                | (1,400, 2,000)     | 47 | 2,000 | (1,700, 2,400) | 1            |
|            | F   | 6,900     | (5,800, 8,300)     | 5,500                      | (4,600, 6,600)     | 80 | 5,500 | (4,600, 6,500) | 3,200                                  | (2,700, 3,900)     | 59 | 3,200 | (2,700, 3,800) | 2,300                                | (1,900, 2,700)     | 41 | 2,300 | (1,900, 2,700) | 1            |
|            | B   | 17,300    | (15,700, 19,100)   | 11,700                     | (10,600, 12,900)   | 68 | 6,800 | (6,200, 7,500) | 5,900                                  | (5,400, 6,500)     | 50 | 3,400 | (3,100, 3,800) | 5,800                                | (5,300, 6,400)     | 50 | 3,400 | (3,100, 3,700) | 1            |
| Barbados   | M   | 8,100     | (7,100, 9,300)     | 5,100                      | (4,400, 5,800)     | 62 | 6,100 | (5,300, 6,900) | 2,400                                  | (2,100, 2,800)     | 48 | 2,900 | (2,500, 3,300) | 2,600                                | (2,300, 3,000)     | 52 | 3,100 | (2,700, 3,600) | 1            |
|            | F   | 9,200     | (8,000, 10,600)    | 6,600                      | (5,800, 7,600)     | 72 | 7,600 | (6,600, 8,800) | 3,500                                  | (3,000, 4,000)     | 52 | 4,000 | (3,400, 4,600) | 3,200                                | (2,800, 3,700)     | 48 | 3,700 | (3,200, 4,200) | 1            |
|            | B   | 621,800   | (612,800, 630,900) | 384,300                    | (378,800, 389,900) | 62 | 5,400 | (5,300, 5,500) | 239,600                                | (236,100, 243,100) | 62 | 3,300 | (3,300, 3,400) | 144,700                              | (142,600, 146,800) | 38 | 2,000 | (2,000, 2,100) | 1            |
| Cuba       | M   | 354,300   | (347,800, 361,000) | 210,900                    | (207,000, 214,800) | 60 | 6,000 | (5,900, 6,100) | 129,400                                | (127,000, 131,800) | 61 | 3,700 | (3,600, 3,700) | 81,500                               | (80,000, 83,000)   | 39 | 2,300 | (2,300, 2,400) | 1            |

| Country            | Sex | Total YLL |                    | Premature cancer mortality |                    |    |       |                | Premature preventable cancer mortality |                    |    |       |                | Premature treatable cancer mortality |                  |    |       |                | Data Quality |
|--------------------|-----|-----------|--------------------|----------------------------|--------------------|----|-------|----------------|----------------------------------------|--------------------|----|-------|----------------|--------------------------------------|------------------|----|-------|----------------|--------------|
|                    |     | N         | UI                 | N                          | UI                 | %  | ASR   | UI             | N                                      | UI                 | %  | ASR   | UI             | N                                    | UI               | %  | ASR   | UI             | Method       |
| Dominican Republic | F   | 267,500   | (261,400, 273,700) | 173,400                    | (169,500, 177,400) | 65 | 4,800 | (4,700, 4,900) | 110,200                                | (107,700, 112,700) | 64 | 3,000 | (3,000, 3,100) | 63,200                               | (61,800, 64,700) | 36 | 1,800 | (1,700, 1,800) | 1            |
|                    | B   | 316,200   | (307,900, 324,700) | 206,500                    | (201,100, 212,100) | 65 | 4,800 | (4,700, 4,900) | 125,400                                | (122,100, 128,800) | 61 | 2,900 | (2,900, 3,000) | 81,100                               | (79,000, 83,300) | 39 | 1,900 | (1,800, 1,900) | 1            |
|                    | M   | 151,900   | (146,400, 157,600) | 87,700                     | (84,600, 91,000)   | 58 | 4,200 | (4,100, 4,400) | 50,100                                 | (48,300, 52,000)   | 57 | 2,400 | (2,300, 2,500) | 37,600                               | (36,300, 39,000) | 43 | 1,800 | (1,800, 1,900) | 1            |
|                    | F   | 164,300   | (158,200, 170,700) | 118,800                    | (114,400, 123,400) | 72 | 5,400 | (5,200, 5,600) | 75,300                                 | (72,500, 78,300)   | 63 | 3,400 | (3,300, 3,600) | 43,500                               | (41,800, 45,100) | 37 | 2,000 | (1,900, 2,000) | 1            |
| France, Guadeloupe | B   | 18,300    | (16,700, 20,000)   | 10,500                     | (9,600, 11,400)    | 57 | 4,200 | (3,900, 4,600) | 6,600                                  | (6,000, 7,200)     | 63 | 2,600 | (2,400, 2,900) | 3,800                                | (3,500, 4,200)   | 37 | 1,600 | (1,500, 1,800) | 1            |
|                    | M   | 9,800     | (8,700, 11,100)    | 5,400                      | (4,800, 6,100)     | 55 | 4,700 | (4,200, 5,300) | 3,600                                  | (3,200, 4,000)     | 66 | 3,000 | (2,700, 3,400) | 1,900                                | (1,700, 2,100)   | 34 | 1,700 | (1,500, 1,900) | 1            |
|                    | F   | 8,400     | (7,400, 9,600)     | 5,000                      | (4,400, 5,700)     | 60 | 3,800 | (3,300, 4,300) | 3,000                                  | (2,700, 3,500)     | 61 | 2,300 | (2,000, 2,600) | 2,000                                | (1,700, 2,300)   | 39 | 1,500 | (1,300, 1,700) | 1            |
| France, Martinique | B   | 17,500    | (16,000, 19,100)   | 9,700                      | (8,900, 10,600)    | 56 | 3,800 | (3,500, 4,200) | 5,600                                  | (5,100, 6,100)     | 57 | 2,100 | (1,900, 2,300) | 4,200                                | (3,800, 4,600)   | 43 | 1,700 | (1,600, 1,900) | 1            |
|                    | M   | 9,200     | (8,200, 10,400)    | 5,000                      | (4,400, 5,600)     | 54 | 4,200 | (3,700, 4,700) | 2,900                                  | (2,600, 3,300)     | 58 | 2,400 | (2,100, 2,700) | 2,100                                | (1,800, 2,400)   | 42 | 1,800 | (1,600, 2,100) | 1            |
|                    | F   | 8,300     | (7,300, 9,400)     | 4,800                      | (4,200, 5,400)     | 58 | 3,500 | (3,100, 4,000) | 2,700                                  | (2,300, 3,000)     | 56 | 1,900 | (1,700, 2,200) | 2,100                                | (1,800, 2,400)   | 44 | 1,600 | (1,400, 1,800) | 1            |
| Haiti              | B   | 239,700   | (231,700, 248,100) | 152,400                    | (147,300, 157,700) | 64 | 4,400 | (4,200, 4,500) | 92,900                                 | (89,800, 96,100)   | 61 | 2,700 | (2,600, 2,800) | 59,500                               | (57,500, 61,600) | 39 | 1,700 | (1,600, 1,800) | 2a           |
|                    | M   | 109,700   | (104,600, 115,100) | 63,100                     | (60,200, 66,200)   | 58 | 3,900 | (3,700, 4,100) | 38,600                                 | (36,800, 40,500)   | 61 | 2,400 | (2,300, 2,500) | 24,600                               | (23,400, 25,800) | 39 | 1,500 | (1,500, 1,600) | 2a           |
|                    | F   | 130,000   | (123,900, 136,400) | 89,200                     | (85,000, 93,600)   | 69 | 4,800 | (4,600, 5,100) | 54,300                                 | (51,700, 57,000)   | 61 | 3,000 | (2,800, 3,100) | 34,900                               | (33,300, 36,700) | 39 | 1,900 | (1,800, 2,000) | 2a           |
| Jamaica            | B   | 119,000   | (114,600, 123,700) | 79,300                     | (76,300, 82,400)   | 67 | 6,100 | (5,900, 6,300) | 44,400                                 | (42,800, 46,200)   | 56 | 3,400 | (3,300, 3,500) | 34,800                               | (33,500, 36,200) | 44 | 2,700 | (2,600, 2,800) | 1            |
|                    | M   | 57,000    | (54,100, 60,000)   | 32,700                     | (31,000, 34,400)   | 57 | 5,200 | (5,000, 5,500) | 16,800                                 | (15,900, 17,700)   | 51 | 2,700 | (2,600, 2,800) | 15,900                               | (15,100, 16,700) | 49 | 2,600 | (2,400, 2,700) | 1            |
|                    | F   | 62,100    | (58,600, 65,700)   | 46,600                     | (44,000, 49,400)   | 75 | 6,900 | (6,500, 7,300) | 27,700                                 | (26,100, 29,300)   | 59 | 4,100 | (3,800, 4,300) | 19,000                               | (17,900, 20,100) | 41 | 2,800 | (2,600, 3,000) | 1            |

| Country             | Sex | Total YLL |                    | Premature cancer mortality |                  |    |       |                | Premature preventable cancer mortality |                  |    |       |                | Premature treatable cancer mortality |                  |    |       |                | Data Quality |
|---------------------|-----|-----------|--------------------|----------------------------|------------------|----|-------|----------------|----------------------------------------|------------------|----|-------|----------------|--------------------------------------|------------------|----|-------|----------------|--------------|
|                     |     | N         | UI                 | N                          | UI               | %  | ASR   | UI             | N                                      | UI               | %  | ASR   | UI             | N                                    | UI               | %  | ASR   | UI             | Method       |
| Puerto Rico         | B   | 118,200   | (114,300, 122,300) | 66,400                     | (64,200, 68,600) | 56 | 3,700 | (3,500, 3,800) | 38,200                                 | (37,000, 39,500) | 58 | 2,100 | (2,000, 2,200) | 28,100                               | (27,200, 29,100) | 42 | 1,600 | (1,500, 1,600) | 1            |
|                     | M   | 64,800    | (62,000, 67,800)   | 35,000                     | (33,500, 36,600) | 54 | 4,200 | (4,000, 4,400) | 20,400                                 | (19,500, 21,300) | 58 | 2,400 | (2,300, 2,500) | 14,600                               | (14,000, 15,300) | 42 | 1,800 | (1,700, 1,900) | 1            |
|                     | F   | 53,400    | (50,700, 56,200)   | 31,400                     | (29,800, 33,000) | 59 | 3,300 | (3,100, 3,400) | 17,900                                 | (17,000, 18,800) | 57 | 1,900 | (1,800, 1,900) | 13,500                               | (12,800, 14,200) | 43 | 1,400 | (1,300, 1,500) | 1            |
| Saint Lucia         | B   | 5,300     | (4,500, 6,300)     | 3,500                      | (3,000, 4,100)   | 66 | 3,800 | (3,200, 4,500) | 2,200                                  | (1,900, 2,600)   | 63 | 2,400 | (2,000, 2,900) | 1,300                                | (1,100, 1,500)   | 37 | 1,400 | (1,200, 1,600) | 1            |
|                     | M   | 2,900     | (2,300, 3,600)     | 1,700                      | (1,300, 2,100)   | 58 | 3,800 | (3,000, 4,700) | 1,100                                  | (900, 1,300)     | 64 | 2,400 | (1,900, 3,000) | 600                                  | (500, 800)       | 36 | 1,400 | (1,100, 1,700) | 1            |
|                     | F   | 2,400     | (1,900, 3,100)     | 1,800                      | (1,400, 2,400)   | 75 | 3,800 | (3,000, 5,000) | 1,100                                  | (900, 1,500)     | 63 | 2,400 | (1,900, 3,200) | 700                                  | (500, 900)       | 37 | 1,400 | (1,100, 1,800) | 1            |
| Trinidad and Tobago | B   | 56,600    | (53,300, 60,200)   | 37,700                     | (35,400, 40,000) | 67 | 5,000 | (4,700, 5,300) | 21,500                                 | (20,200, 22,800) | 57 | 2,800 | (2,700, 3,000) | 16,200                               | (15,200, 17,200) | 43 | 2,100 | (2,000, 2,300) | 1            |
|                     | M   | 27,900    | (25,700, 30,300)   | 16,700                     | (15,400, 18,200) | 60 | 4,500 | (4,100, 4,900) | 9,000                                  | (8,200, 9,700)   | 54 | 2,400 | (2,200, 2,600) | 7,800                                | (7,200, 8,500)   | 46 | 2,100 | (1,900, 2,300) | 1            |
|                     | F   | 28,700    | (26,300, 31,400)   | 20,900                     | (19,100, 22,900) | 73 | 5,400 | (5,000, 5,900) | 12,500                                 | (11,500, 13,700) | 60 | 3,200 | (3,000, 3,500) | 8,400                                | (7,700, 9,200)   | 40 | 2,200 | (2,000, 2,400) | 1            |
| Central America     |     |           |                    |                            |                  |    |       |                |                                        |                  |    |       |                |                                      |                  |    |       |                |              |
| Belize              | B   | 6,000     | (5,000, 7,100)     | 4,400                      | (3,700, 5,200)   | 74 | 3,400 | (2,900, 4,000) | 3,000                                  | (2,500, 3,600)   | 68 | 2,300 | (2,000, 2,800) | 1,400                                | (1,200, 1,700)   | 32 | 1,100 | (900, 1,300)   | 2a           |
|                     | M   | 2,800     | (2,200, 3,500)     | 2,000                      | (1,600, 2,500)   | 71 | 3,300 | (2,600, 4,200) | 1,300                                  | (1,000, 1,600)   | 66 | 2,100 | (1,700, 2,700) | 700                                  | (500, 800)       | 34 | 1,200 | (900, 1,500)   | 2a           |
|                     | F   | 3,200     | (2,500, 4,100)     | 2,500                      | (1,900, 3,200)   | 76 | 3,500 | (2,700, 4,500) | 1,700                                  | (1,300, 2,200)   | 70 | 2,500 | (1,900, 3,200) | 700                                  | (600, 900)       | 30 | 1,000 | (800, 1,300)   | 2a           |
| Costa Rica          | B   | 146,200   | (141,600, 150,900) | 90,400                     | (87,600, 93,300) | 62 | 3,600 | (3,500, 3,800) | 53,200                                 | (51,500, 54,900) | 59 | 2,100 | (2,100, 2,200) | 37,200                               | (36,100, 38,400) | 41 | 1,500 | (1,400, 1,500) | 1            |
|                     | M   | 75,900    | (72,600, 79,200)   | 44,600                     | (42,700, 46,600) | 59 | 3,700 | (3,500, 3,800) | 25,300                                 | (24,200, 26,400) | 57 | 2,100 | (2,000, 2,200) | 19,300                               | (18,500, 20,200) | 43 | 1,600 | (1,500, 1,600) | 1            |
|                     | F   | 70,300    | (67,100, 73,600)   | 45,800                     | (43,800, 48,000) | 65 | 3,600 | (3,500, 3,800) | 27,900                                 | (26,600, 29,200) | 61 | 2,200 | (2,100, 2,300) | 17,900                               | (17,100, 18,800) | 39 | 1,400 | (1,400, 1,500) | 1            |

| Country     | Sex | Total YLL |                        | Premature cancer mortality |                        |    |       |                | Premature preventable cancer mortality |                    |    |       |                | Premature treatable cancer mortality |                    |    |       |                | Data Quality |
|-------------|-----|-----------|------------------------|----------------------------|------------------------|----|-------|----------------|----------------------------------------|--------------------|----|-------|----------------|--------------------------------------|--------------------|----|-------|----------------|--------------|
|             |     | N         | UI                     | N                          | UI                     | %  | ASR   | UI             | N                                      | UI                 | %  | ASR   | UI             | N                                    | UI                 | %  | ASR   | UI             | Method       |
| El Salvador | B   | 136,400   | (131,500, 141,500)     | 78,700                     | (75,900, 81,700)       | 58 | 3,200 | (3,100, 3,300) | 45,800                                 | (44,200, 47,500)   | 58 | 1,900 | (1,800, 1,900) | 32,900                               | (31,700, 34,100)   | 42 | 1,300 | (1,300, 1,400) | 1            |
|             | M   | 58,800    | (55,600, 62,100)       | 28,200                     | (26,700, 29,800)       | 48 | 2,700 | (2,500, 2,800) | 15,800                                 | (15,000, 16,700)   | 56 | 1,500 | (1,400, 1,600) | 12,400                               | (11,800, 13,100)   | 44 | 1,200 | (1,100, 1,200) | 1            |
|             | F   | 77,600    | (73,900, 81,600)       | 50,500                     | (48,100, 53,100)       | 65 | 3,600 | (3,400, 3,700) | 30,000                                 | (28,600, 31,600)   | 59 | 2,100 | (2,000, 2,200) | 20,500                               | (19,500, 21,500)   | 41 | 1,400 | (1,400, 1,500) | 1            |
| Guatemala   | B   | 285,500   | (278,300, 292,900)     | 178,800                    | (174,300, 183,500)     | 63 | 3,600 | (3,500, 3,700) | 123,000                                | (119,900, 126,100) | 69 | 2,500 | (2,500, 2,600) | 55,900                               | (54,500, 57,300)   | 31 | 1,100 | (1,100, 1,100) | 1            |
|             | M   | 124,400   | (119,800, 129,200)     | 67,100                     | (64,600, 69,700)       | 54 | 3,000 | (2,900, 3,200) | 42,400                                 | (40,800, 44,000)   | 63 | 2,000 | (1,900, 2,100) | 24,700                               | (23,800, 25,600)   | 37 | 1,100 | (1,000, 1,100) | 1            |
|             | F   | 161,100   | (155,500, 166,800)     | 111,700                    | (107,900, 115,700)     | 69 | 4,100 | (3,900, 4,200) | 80,600                                 | (77,800, 83,400)   | 72 | 3,000 | (2,900, 3,100) | 31,200                               | (30,100, 32,300)   | 28 | 1,100 | (1,100, 1,100) | 1            |
| Honduras    | B   | 225,200   | (215,600, 235,300)     | 142,100                    | (136,000, 148,400)     | 63 | 4,600 | (4,400, 4,800) | 80,500                                 | (77,000, 84,100)   | 57 | 2,600 | (2,500, 2,700) | 61,600                               | (59,000, 64,400)   | 43 | 2,000 | (1,900, 2,000) | 2a           |
|             | M   | 108,700   | (101,900, 115,900)     | 59,200                     | (55,500, 63,200)       | 54 | 4,100 | (3,900, 4,400) | 29,600                                 | (27,800, 31,600)   | 50 | 2,100 | (2,000, 2,300) | 29,600                               | (27,800, 31,600)   | 50 | 2,000 | (1,900, 2,100) | 2a           |
|             | F   | 116,500   | (109,800, 123,600)     | 82,800                     | (78,100, 87,900)       | 71 | 5,000 | (4,700, 5,300) | 50,900                                 | (48,000, 54,000)   | 61 | 3,100 | (2,900, 3,300) | 32,000                               | (30,100, 33,900)   | 39 | 1,900 | (1,800, 2,000) | 2a           |
| Mexico      | B   | 2,586,200 | (2,566,100, 2,606,500) | 1,702,300                  | (1,689,100, 1,715,600) | 66 | 3,200 | (3,200, 3,200) | 969,900                                | (962,400, 977,500) | 57 | 1,800 | (1,800, 1,800) | 732,400                              | (726,700, 738,100) | 43 | 1,400 | (1,400, 1,400) | 1            |
|             | M   | 1,207,300 | (1,194,100, 1,220,700) | 713,700                    | (705,900, 721,600)     | 59 | 2,900 | (2,900, 2,900) | 379,200                                | (375,000, 383,400) | 53 | 1,500 | (1,500, 1,600) | 334,500                              | (330,900, 338,200) | 47 | 1,300 | (1,300, 1,400) | 1            |
|             | F   | 1,378,900 | (1,363,900, 1,394,100) | 988,600                    | (977,800, 999,500)     | 72 | 3,500 | (3,400, 3,500) | 590,700                                | (584,300, 597,200) | 60 | 2,100 | (2,100, 2,100) | 397,900                              | (393,500, 402,200) | 40 | 1,400 | (1,400, 1,400) | 1            |
| Nicaragua   | B   | 139,900   | (134,900, 145,100)     | 93,800                     | (90,400, 97,200)       | 67 | 4,000 | (3,900, 4,200) | 58,900                                 | (56,800, 61,000)   | 63 | 2,500 | (2,500, 2,600) | 34,900                               | (33,600, 36,200)   | 37 | 1,500 | (1,400, 1,500) | 1            |
|             | M   | 62,600    | (59,400, 66,000)       | 37,600                     | (35,700, 39,600)       | 60 | 3,600 | (3,400, 3,800) | 21,700                                 | (20,600, 22,900)   | 58 | 2,100 | (2,000, 2,300) | 15,900                               | (15,100, 16,800)   | 42 | 1,500 | (1,400, 1,600) | 1            |
|             | F   | 77,300    | (73,600, 81,300)       | 56,200                     | (53,400, 59,000)       | 73 | 4,400 | (4,200, 4,600) | 37,200                                 | (35,400, 39,100)   | 66 | 2,900 | (2,800, 3,100) | 19,000                               | (18,000, 19,900)   | 34 | 1,500 | (1,400, 1,500) | 1            |
| Panama      | B   | 96,100    | (92,300, 100,100)      | 58,900                     | (56,500, 61,300)       | 61 | 3,300 | (3,200, 3,400) | 34,900                                 | (33,500, 36,400)   | 59 | 1,900 | (1,900, 2,000) | 24,000                               | (23,000, 25,000)   | 41 | 1,300 | (1,300, 1,400) | 1            |

| Country       | Sex | Total YLL |                        | Premature cancer mortality |                        |    |       | Premature preventable cancer mortality |           |                        |    | Premature treatable cancer mortality |                |           |                        | Data Quality |       |                |        |
|---------------|-----|-----------|------------------------|----------------------------|------------------------|----|-------|----------------------------------------|-----------|------------------------|----|--------------------------------------|----------------|-----------|------------------------|--------------|-------|----------------|--------|
|               |     | N         | UI                     | N                          | UI                     | %  | ASR   | UI                                     | N         | UI                     | %  | ASR                                  | UI             | N         | UI                     | %            | ASR   | UI             | Method |
|               | M   | 47,100    | (44,600, 49,900)       | 26,200                     | (24,800, 27,700)       | 56 | 3,000 | (2,900, 3,200)                         | 14,300    | (13,500, 15,100)       | 54 | 1,700                                | (1,600, 1,700) | 11,900    | (11,300, 12,600)       | 46           | 1,400 | (1,300, 1,500) | 1      |
|               | F   | 49,000    | (46,100, 52,000)       | 32,700                     | (30,800, 34,700)       | 67 | 3,600 | (3,300, 3,800)                         | 20,700    | (19,500, 21,900)       | 63 | 2,200                                | (2,100, 2,400) | 12,000    | (11,300, 12,700)       | 37           | 1,300 | (1,200, 1,400) | 1      |
| South America |     |           |                        |                            |                        |    |       |                                        |           |                        |    |                                      |                |           |                        |              |       |                |        |
|               | B   | 1,719,500 | (1,703,400, 1,735,700) | 1,080,900                  | (1,070,800, 1,091,100) | 63 | 5,400 | (5,400, 5,500)                         | 674,300   | (668,000, 680,600)     | 62 | 3,400                                | (3,300, 3,400) | 406,600   | (402,800, 410,500)     | 38           | 2,000 | (2,000, 2,100) | 1      |
| Argentina     | M   | 869,400   | (858,200, 880,700)     | 531,000                    | (524,200, 537,900)     | 61 | 5,600 | (5,600, 5,700)                         | 325,400   | (321,200, 329,600)     | 61 | 3,500                                | (3,400, 3,500) | 205,600   | (202,900, 208,200)     | 39           | 2,200 | (2,100, 2,200) | 1      |
|               | F   | 850,100   | (838,700, 861,600)     | 549,900                    | (542,600, 557,400)     | 65 | 5,300 | (5,200, 5,300)                         | 348,900   | (344,200, 353,600)     | 63 | 3,300                                | (3,300, 3,400) | 201,100   | (198,400, 203,800)     | 37           | 1,900 | (1,900, 1,900) | 1      |
|               | B   | 276,200   | (265,500, 287,300)     | 181,700                    | (174,700, 189,000)     | 66 | 4,500 | (4,400, 4,700)                         | 109,900   | (105,600, 114,300)     | 60 | 2,700                                | (2,600, 2,800) | 71,900    | (69,100, 74,800)       | 40           | 1,800 | (1,700, 1,900) | 2a     |
| Bolivia       | M   | 117,500   | (110,800, 124,600)     | 66,800                     | (63,000, 70,800)       | 57 | 3,500 | (3,300, 3,700)                         | 33,800    | (31,900, 35,800)       | 51 | 1,800                                | (1,700, 1,900) | 33,000    | (31,100, 35,000)       | 49           | 1,700 | (1,600, 1,800) | 2a     |
|               | F   | 158,700   | (150,500, 167,400)     | 114,900                    | (109,000, 121,200)     | 72 | 5,600 | (5,300, 5,900)                         | 76,000    | (72,100, 80,200)       | 66 | 3,700                                | (3,500, 3,900) | 38,900    | (36,800, 41,000)       | 34           | 1,900 | (1,800, 2,000) | 2a     |
|               | B   | 6,912,500 | (6,880,000, 6,945,200) | 4,736,200                  | (4,713,900, 4,758,500) | 69 | 4,600 | (4,600, 4,600)                         | 2,798,000 | (2,784,800, 2,811,200) | 59 | 2,700                                | (2,700, 2,700) | 1,938,200 | (1,929,100, 1,947,300) | 41           | 1,900 | (1,900, 1,900) | 1      |
| Brazil        | M   | 3,564,600 | (3,541,900, 3,587,600) | 2,365,800                  | (2,350,700, 2,381,000) | 66 | 4,900 | (4,900, 4,900)                         | 1,355,200 | (1,346,500, 1,363,900) | 57 | 2,800                                | (2,800, 2,800) | 1,010,600 | (1,004,200, 1,017,100) | 43           | 2,100 | (2,100, 2,100) | 1      |
|               | F   | 3,347,900 | (3,325,000, 3,370,900) | 2,370,400                  | (2,354,200, 2,386,700) | 71 | 4,400 | (4,400, 4,400)                         | 1,442,800 | (1,432,900, 1,452,700) | 61 | 2,700                                | (2,700, 2,700) | 927,600   | (921,200, 933,900)     | 39           | 1,700 | (1,700, 1,700) | 1      |
|               | B   | 647,100   | (638,000, 656,300)     | 380,300                    | (375,000, 385,800)     | 59 | 3,800 | (3,700, 3,800)                         | 233,800   | (230,500, 237,100)     | 61 | 2,300                                | (2,300, 2,300) | 146,500   | (144,500, 148,600)     | 39           | 1,500 | (1,400, 1,500) | 1      |
| Chile         | M   | 335,400   | (329,000, 341,800)     | 187,500                    | (184,000, 191,100)     | 56 | 3,800 | (3,800, 3,900)                         | 113,700   | (111,600, 115,900)     | 61 | 2,300                                | (2,300, 2,400) | 73,800    | (72,400, 75,200)       | 39           | 1,500 | (1,500, 1,600) | 1      |
|               | F   | 311,700   | (305,200, 318,400)     | 192,800                    | (188,800, 196,900)     | 62 | 3,700 | (3,700, 3,800)                         | 120,100   | (117,500, 122,600)     | 62 | 2,300                                | (2,300, 2,400) | 72,700    | (71,200, 74,300)       | 38           | 1,400 | (1,400, 1,400) | 1      |
| Colombia      | B   | 1,453,100 | (1,438,700, 1,467,800) | 932,500                    | (923,200, 941,900)     | 64 | 4,100 | (4,000, 4,100)                         | 551,900   | (546,400, 557,400)     | 59 | 2,400                                | (2,400, 2,400) | 380,600   | (376,800, 384,500)     | 41           | 1,700 | (1,600, 1,700) | 1      |

| Country       | Sex | Total YLL |                    | Premature cancer mortality |                    |    |       |                | Premature preventable cancer mortality |                    |    |       |                | Premature treatable cancer mortality |                    |    |       |                | Data Quality |
|---------------|-----|-----------|--------------------|----------------------------|--------------------|----|-------|----------------|----------------------------------------|--------------------|----|-------|----------------|--------------------------------------|--------------------|----|-------|----------------|--------------|
|               |     | N         | UI                 | N                          | UI                 | %  | ASR   | UI             | N                                      | UI                 | %  | ASR   | UI             | N                                    | UI                 | %  | ASR   | UI             | Method       |
| Ecuador       | M   | 688,800   | (679,100, 698,600) | 410,200                    | (404,500, 416,100) | 60 | 3,800 | (3,800, 3,900) | 234,900                                | (231,600, 238,200) | 57 | 2,200 | (2,200, 2,200) | 175,400                              | (172,900, 177,900) | 43 | 1,600 | (1,600, 1,600) | 1            |
|               | F   | 764,300   | (753,700, 775,100) | 522,300                    | (515,000, 529,700) | 68 | 4,300 | (4,200, 4,400) | 317,000                                | (312,600, 321,500) | 61 | 2,600 | (2,600, 2,600) | 205,300                              | (202,400, 208,200) | 39 | 1,700 | (1,700, 1,700) | 1            |
|               | B   | 393,500   | (385,600, 401,600) | 229,600                    | (225,000, 234,400) | 58 | 3,300 | (3,300, 3,400) | 132,700                                | (130,000, 135,400) | 58 | 1,900 | (1,900, 2,000) | 97,000                               | (95,000, 99,000)   | 42 | 1,400 | (1,400, 1,400) | 1            |
|               | M   | 182,400   | (177,200, 187,800) | 94,300                     | (91,600, 97,000)   | 52 | 2,800 | (2,800, 2,900) | 50,500                                 | (49,100, 52,000)   | 54 | 1,500 | (1,500, 1,600) | 43,700                               | (42,500, 45,000)   | 46 | 1,300 | (1,300, 1,300) | 1            |
|               | F   | 211,100   | (205,200, 217,200) | 135,400                    | (131,600, 139,300) | 64 | 3,800 | (3,700, 4,000) | 82,100                                 | (79,800, 84,500)   | 61 | 2,300 | (2,300, 2,400) | 53,300                               | (51,800, 54,800)   | 39 | 1,500 | (1,500, 1,600) | 1            |
| French Guiana | B   | 5,700     | (4,700, 6,900)     | 3,600                      | (3,000, 4,300)     | 63 | 3,300 | (2,700, 4,000) | 2,200                                  | (1,800, 2,700)     | 61 | 2,000 | (1,700, 2,400) | 1,400                                | (1,200, 1,700)     | 39 | 1,300 | (1,000, 1,500) | 1            |
|               | M   | 3,500     | (2,700, 4,400)     | 1,900                      | (1,500, 2,500)     | 56 | 3,500 | (2,800, 4,600) | 1,200                                  | (900, 1,600)       | 63 | 2,300 | (1,800, 2,900) | 700                                  | (500, 900)         | 37 | 1,300 | (1,000, 1,700) | 1            |
|               | F   | 2,300     | (1,700, 3,100)     | 1,700                      | (1,200, 2,300)     | 74 | 3,000 | (2,200, 4,000) | 1,000                                  | (700, 1,300)       | 58 | 1,800 | (1,300, 2,400) | 700                                  | (500, 900)         | 42 | 1,200 | (900, 1,700)   | 1            |
| Guyana        | B   | 16,200    | (14,500, 18,200)   | 11,400                     | (10,200, 12,700)   | 70 | 3,600 | (3,200, 4,000) | 7,000                                  | (6,300, 7,900)     | 62 | 2,200 | (2,000, 2,500) | 4,300                                | (3,900, 4,800)     | 38 | 1,400 | (1,200, 1,500) | 1            |
|               | M   | 6,300     | (5,400, 7,500)     | 3,500                      | (3,000, 4,100)     | 55 | 2,200 | (1,900, 2,600) | 2,100                                  | (1,800, 2,400)     | 59 | 1,300 | (1,100, 1,500) | 1,400                                | (1,200, 1,700)     | 41 | 900   | (800, 1,100)   | 1            |
|               | F   | 9,900     | (8,500, 11,500)    | 7,900                      | (6,700, 9,200)     | 79 | 4,800 | (4,200, 5,700) | 5,000                                  | (4,300, 5,800)     | 63 | 3,100 | (2,600, 3,600) | 2,900                                | (2,500, 3,400)     | 37 | 1,800 | (1,500, 2,100) | 1            |
| Paraguay      | B   | 181,300   | (175,700, 187,100) | 119,900                    | (116,200, 123,700) | 66 | 4,800 | (4,700, 5,000) | 75,300                                 | (73,000, 77,700)   | 63 | 3,000 | (2,900, 3,100) | 44,600                               | (43,200, 46,000)   | 37 | 1,800 | (1,700, 1,800) | 1            |
|               | M   | 92,600    | (88,800, 96,600)   | 57,200                     | (54,800, 59,600)   | 62 | 4,600 | (4,400, 4,800) | 32,700                                 | (31,400, 34,100)   | 57 | 2,700 | (2,600, 2,800) | 24,400                               | (23,400, 25,500)   | 43 | 1,900 | (1,900, 2,000) | 1            |
|               | F   | 88,700    | (84,700, 92,900)   | 62,800                     | (59,900, 65,700)   | 71 | 5,000 | (4,800, 5,300) | 42,600                                 | (40,700, 44,600)   | 68 | 3,400 | (3,200, 3,600) | 20,100                               | (19,200, 21,100)   | 32 | 1,600 | (1,600, 1,700) | 1            |
| Peru          | B   | 917,000   | (905,100, 929,000) | 567,200                    | (559,900, 574,600) | 62 | 4,000 | (3,900, 4,000) | 342,400                                | (338,000, 346,900) | 60 | 2,400 | (2,400, 2,400) | 224,800                              | (221,900, 227,800) | 40 | 1,600 | (1,500, 1,600) | 1            |
|               | M   | 413,200   | (405,500, 421,000) | 230,200                    | (225,900, 234,500) | 56 | 3,200 | (3,200, 3,300) | 126,200                                | (123,900, 128,600) | 55 | 1,800 | (1,800, 1,800) | 104,000                              | (102,000, 105,900) | 45 | 1,500 | (1,400, 1,500) | 1            |

| Country                  | Sex | Total YLL  |                          | Premature cancer mortality |                        |    |       | Premature preventable cancer mortality |           |                        |    | Premature treatable cancer mortality |                |           |                        | Data Quality |       |                |        |
|--------------------------|-----|------------|--------------------------|----------------------------|------------------------|----|-------|----------------------------------------|-----------|------------------------|----|--------------------------------------|----------------|-----------|------------------------|--------------|-------|----------------|--------|
|                          |     | N          | UI                       | N                          | UI                     | %  | ASR   | UI                                     | N         | UI                     | %  | ASR                                  | UI             | N         | UI                     | %            | ASR   | UI             | Method |
| Suriname                 | F   | 503,800    | (494,900, 512,900)       | 337,000                    | (331,100, 343,100)     | 67 | 4,700 | (4,600, 4,800)                         | 216,200   | (212,300, 220,100)     | 64 | 3,000                                | (3,000, 3,100) | 120,900   | (118,700, 123,000)     | 36           | 1,700 | (1,700, 1,700) | 1      |
|                          | B   | 17,600     | (15,800, 19,600)         | 11,900                     | (10,700, 13,300)       | 68 | 4,800 | (4,300, 5,300)                         | 7,600     | (6,800, 8,500)         | 64 | 3,000                                | (2,700, 3,400) | 4,300     | (3,900, 4,800)         | 36           | 1,700 | (1,600, 1,900) | 1      |
|                          | M   | 9,500      | (8,200, 11,000)          | 6,000                      | (5,200, 6,900)         | 63 | 5,000 | (4,300, 5,800)                         | 3,600     | (3,100, 4,200)         | 60 | 3,000                                | (2,600, 3,400) | 2,400     | (2,100, 2,800)         | 40           | 2,000 | (1,700, 2,300) | 1      |
|                          | F   | 8,100      | (6,900, 9,500)           | 5,900                      | (5,000, 6,900)         | 73 | 4,600 | (3,900, 5,300)                         | 4,000     | (3,400, 4,700)         | 67 | 3,100                                | (2,600, 3,600) | 1,900     | (1,700, 2,300)         | 33           | 1,500 | (1,300, 1,800) | 1      |
| Uruguay                  | B   | 189,200    | (184,200, 194,300)       | 112,200                    | (109,300, 115,300)     | 59 | 6,400 | (6,200, 6,500)                         | 72,400    | (70,500, 74,300)       | 64 | 4,100                                | (4,000, 4,200) | 39,900    | (38,800, 40,900)       | 36           | 2,300 | (2,200, 2,300) | 1      |
|                          | M   | 103,900    | (100,200, 107,700)       | 61,600                     | (59,500, 63,900)       | 59 | 7,300 | (7,000, 7,600)                         | 40,200    | (38,800, 41,700)       | 65 | 4,700                                | (4,600, 4,900) | 21,400    | (20,700, 22,200)       | 35           | 2,600 | (2,500, 2,600) | 1      |
|                          | F   | 85,300     | (81,900, 88,800)         | 50,600                     | (48,600, 52,700)       | 59 | 5,600 | (5,300, 5,800)                         | 32,200    | (30,900, 33,500)       | 64 | 3,500                                | (3,400, 3,700) | 18,400    | (17,700, 19,200)       | 36           | 2,000 | (1,900, 2,100) | 1      |
| Venezuela                | B   | 861,800    | (849,800, 873,900)       | 591,300                    | (583,100, 599,600)     | 69 | 4,800 | (4,700, 4,800)                         | 360,000   | (355,000, 365,100)     | 61 | 2,900                                | (2,900, 2,900) | 231,300   | (228,100, 234,500)     | 39           | 1,900 | (1,800, 1,900) | 1      |
|                          | M   | 400,600    | (392,800, 408,500)       | 256,300                    | (251,300, 261,400)     | 64 | 4,300 | (4,300, 4,400)                         | 143,600   | (140,800, 146,500)     | 56 | 2,400                                | (2,400, 2,500) | 112,600   | (110,400, 114,900)     | 44           | 1,900 | (1,900, 1,900) | 1      |
|                          | F   | 461,200    | (452,000, 470,600)       | 335,000                    | (328,400, 341,800)     | 73 | 5,200 | (5,100, 5,300)                         | 216,400   | (212,100, 220,800)     | 65 | 3,300                                | (3,300, 3,400) | 118,700   | (116,300, 121,100)     | 35           | 1,800 | (1,800, 1,900) | 1      |
| Northern America         |     |            |                          |                            |                        |    |       |                                        |           |                        |    |                                      |                |           |                        |              |       |                |        |
| Canada                   | B   | 1,785,600  | (1,771,100, 1,800,200)   | 962,400                    | (954,600, 970,300)     | 54 | 4,000 | (4,000, 4,100)                         | 610,600   | (605,700, 615,600)     | 63 | 2,500                                | (2,500, 2,500) | 351,800   | (349,000, 354,700)     | 37           | 1,500 | (1,500, 1,500) | 1      |
|                          | M   | 936,700    | (926,600, 947,000)       | 490,000                    | (484,700, 495,300)     | 52 | 4,100 | (4,000, 4,100)                         | 308,300   | (305,000, 311,700)     | 63 | 2,500                                | (2,500, 2,500) | 181,700   | (179,700, 183,700)     | 37           | 1,500 | (1,500, 1,600) | 1      |
|                          | F   | 848,800    | (838,600, 859,200)       | 472,500                    | (466,800, 478,200)     | 56 | 4,000 | (3,900, 4,000)                         | 302,300   | (298,700, 306,000)     | 64 | 2,500                                | (2,500, 2,500) | 170,100   | (168,100, 172,200)     | 36           | 1,500 | (1,500, 1,500) | 1      |
| United States of America | B   | 13,472,200 | (13,431,800, 13,512,800) | 7,973,200                  | (7,949,300, 7,997,200) | 59 | 4,100 | (4,100, 4,100)                         | 5,053,800 | (5,038,600, 5,069,000) | 63 | 2,600                                | (2,600, 2,600) | 2,919,400 | (2,910,700, 2,928,200) | 37           | 1,500 | (1,500, 1,500) | 1      |
|                          | M   | 7,090,200  | (7,060,900, 7,119,700)   | 4,163,500                  | (4,146,200, 4,180,800) | 59 | 4,300 | (4,300, 4,300)                         | 2,653,400 | (2,642,500, 2,664,500) | 64 | 2,700                                | (2,700, 2,700) | 1,510,000 | (1,503,800, 1,516,300) | 36           | 1,600 | (1,600, 1,600) | 1      |

| Country      | Sex | Total YLL  |                          | Premature cancer mortality |                          |    |        |                  | Premature preventable cancer mortality |                          |    |        |                  | Premature treatable cancer mortality |                          |    |       |                | Data Quality |
|--------------|-----|------------|--------------------------|----------------------------|--------------------------|----|--------|------------------|----------------------------------------|--------------------------|----|--------|------------------|--------------------------------------|--------------------------|----|-------|----------------|--------------|
|              |     | N          | UI                       | N                          | UI                       | %  | ASR    | UI               | N                                      | UI                       | %  | ASR    | UI               | N                                    | UI                       | %  | ASR   | UI             | Method       |
|              | F   | 6,382,000  | (6,353,900, 6,410,300)   | 3,809,700                  | (3,793,000, 3,826,600)   | 60 | 3,900  | (3,900, 4,000)   | 2,400,300                              | (2,389,800, 2,410,900)   | 63 | 2,500  | (2,400, 2,500)   | 1,409,400                            | (1,403,200, 1,415,600)   | 37 | 1,500 | (1,500, 1,500) | 1            |
| Eastern Asia |     |            |                          |                            |                          |    |        |                  |                                        |                          |    |        |                  |                                      |                          |    |       |                |              |
|              | B   | 80,259,900 | (80,035,600, 80,484,800) | 58,286,100                 | (58,123,200, 58,449,400) | 73 | 6,600  | (6,500, 6,600)   | 46,040,100                             | (45,911,400, 46,169,100) | 79 | 5,200  | (5,200, 5,200)   | 12,245,900                           | (12,211,700, 12,280,300) | 21 | 1,400 | (1,400, 1,400) | 2b           |
|              | M   | 49,138,400 | (48,953,600, 49,323,800) | 36,166,100                 | (36,030,100, 36,302,600) | 74 | 8,100  | (8,100, 8,100)   | 30,066,800                             | (29,953,800, 30,180,300) | 83 | 6,700  | (6,700, 6,700)   | 6,099,300                            | (6,076,300, 6,122,300)   | 17 | 1,400 | (1,400, 1,400) | 2b           |
|              | F   | 31,121,500 | (30,990,300, 31,253,300) | 22,120,000                 | (22,026,700, 22,213,600) | 71 | 5,000  | (5,000, 5,100)   | 15,973,300                             | (15,905,900, 16,041,000) | 72 | 3,600  | (3,600, 3,600)   | 6,146,700                            | (6,120,700, 6,172,700)   | 28 | 1,400 | (1,400, 1,400) | 2b           |
|              | B   | 7,052,200  | (7,025,400, 7,079,200)   | 2,664,000                  | (2,653,800, 2,674,100)   | 38 | 3,300  | (3,300, 3,300)   | 1,787,200                              | (1,780,400, 1,794,000)   | 67 | 2,200  | (2,200, 2,200)   | 876,800                              | (873,400, 880,100)       | 33 | 1,100 | (1,100, 1,100) | 1            |
|              | M   | 4,133,200  | (4,112,400, 4,154,200)   | 1,526,700                  | (1,519,000, 1,534,400)   | 37 | 3,700  | (3,600, 3,700)   | 1,080,300                              | (1,074,900, 1,085,800)   | 71 | 2,500  | (2,500, 2,600)   | 446,300                              | (444,100, 448,600)       | 29 | 1,100 | (1,100, 1,100) | 1            |
|              | F   | 2,919,000  | (2,901,900, 2,936,300)   | 1,137,300                  | (1,130,600, 1,144,000)   | 39 | 3,000  | (3,000, 3,000)   | 706,900                                | (702,700, 711,100)       | 62 | 1,800  | (1,800, 1,800)   | 430,400                              | (427,900, 433,000)       | 38 | 1,100 | (1,100, 1,100) | 1            |
|              | B   | 1,170,800  | (1,116,000, 1,228,400)   | 861,200                    | (820,800, 903,500)       | 74 | 6,400  | (6,100, 6,700)   | 653,500                                | (622,800, 685,600)       | 76 | 4,800  | (4,600, 5,100)   | 207,700                              | (198,000, 217,900)       | 24 | 1,500 | (1,500, 1,600) | 9            |
|              | M   | 640,300    | (601,000, 682,100)       | 502,600                    | (471,800, 535,400)       | 78 | 7,700  | (7,200, 8,200)   | 403,600                                | (378,800, 429,900)       | 80 | 6,200  | (5,800, 6,600)   | 99,000                               | (92,900, 105,500)        | 20 | 1,500 | (1,400, 1,600) | 9            |
|              | F   | 530,500    | (492,900, 571,100)       | 358,600                    | (333,100, 386,000)       | 68 | 5,200  | (4,900, 5,600)   | 249,900                                | (232,100, 269,000)       | 70 | 3,600  | (3,400, 3,900)   | 108,700                              | (101,000, 117,000)       | 30 | 1,600 | (1,500, 1,700) | 9            |
|              | B   | 1,909,900  | (1,894,400, 1,925,400)   | 1,086,700                  | (1,077,900, 1,095,600)   | 57 | 3,100  | (3,100, 3,200)   | 761,000                                | (754,800, 767,200)       | 70 | 2,200  | (2,200, 2,200)   | 325,800                              | (323,100, 328,400)       | 30 | 1,000 | (1,000, 1,000) | 1            |
|              | M   | 1,178,400  | (1,166,400, 1,190,600)   | 677,200                    | (670,300, 684,200)       | 57 | 3,800  | (3,800, 3,900)   | 502,600                                | (497,500, 507,800)       | 74 | 2,800  | (2,800, 2,900)   | 174,600                              | (172,800, 176,400)       | 26 | 1,000 | (1,000, 1,000) | 1            |
|              | F   | 731,400    | (721,900, 741,000)       | 409,500                    | (404,200, 414,900)       | 56 | 2,400  | (2,400, 2,500)   | 258,400                                | (255,000, 261,800)       | 63 | 1,500  | (1,500, 1,600)   | 151,100                              | (149,200, 153,100)       | 37 | 900   | (900, 900)     | 1            |
|              | B   | 135,400    | (129,600, 141,500)       | 109,700                    | (105,000, 114,700)       | 81 | 9,200  | (8,800, 9,600)   | 97,800                                 | (93,600, 102,200)        | 89 | 8,300  | (7,900, 8,600)   | 11,900                               | (11,400, 12,500)         | 11 | 1,000 | (900, 1,000)   | 2a           |
|              | M   | 80,200     | (75,700, 85,000)         | 67,700                     | (63,900, 71,800)         | 84 | 12,200 | (11,500, 12,900) | 61,700                                 | (58,200, 65,400)         | 91 | 11,200 | (10,500, 11,800) | 6,100                                | (5,700, 6,400)           | 9  | 1,000 | (1,000, 1,100) | 2a           |
|              | F   | 55,200     | (51,500, 59,100)         | 42,000                     | (39,200, 44,900)         | 76 | 6,600  | (6,200, 7,100)   | 36,100                                 | (33,700, 38,700)         | 86 | 5,800  | (5,400, 6,200)   | 5,900                                | (5,500, 6,300)           | 14 | 900   | (800, 900)     | 2a           |



| Country                          | Sex | Total YLL |                        | Premature cancer mortality |                        |    |       |                 | Premature preventable cancer mortality |                        |    |       |                | Premature treatable cancer mortality |                        |    |       |                | Data Quality |
|----------------------------------|-----|-----------|------------------------|----------------------------|------------------------|----|-------|-----------------|----------------------------------------|------------------------|----|-------|----------------|--------------------------------------|------------------------|----|-------|----------------|--------------|
|                                  |     | N         | UI                     | N                          | UI                     | %  | ASR   | UI              | N                                      | UI                     | %  | ASR   | UI             | N                                    | UI                     | %  | ASR   | UI             | Method       |
| South-Eastern Asia               |     |           |                        |                            |                        |    |       |                 |                                        |                        |    |       |                |                                      |                        |    |       |                |              |
| Brunei Darussalam                | B   | 12,000    | (10,500, 13,600)       | 9,200                      | (8,100, 10,400)        | 77 | 4,600 | (4,100, 5,300)  | 6,000                                  | (5,300, 6,800)         | 65 | 3,100 | (2,700, 3,500) | 3,200                                | (2,800, 3,600)         | 35 | 1,600 | (1,400, 1,800) | 2a           |
|                                  | M   | 6,200     | (5,200, 7,500)         | 4,500                      | (3,700, 5,400)         | 72 | 4,500 | (3,800, 5,400)  | 2,900                                  | (2,400, 3,500)         | 65 | 3,000 | (2,500, 3,600) | 1,600                                | (1,300, 1,900)         | 35 | 1,500 | (1,300, 1,900) | 2a           |
|                                  | F   | 5,700     | (4,800, 6,900)         | 4,700                      | (3,900, 5,600)         | 82 | 4,800 | (4,000, 5,700)  | 3,100                                  | (2,600, 3,700)         | 66 | 3,200 | (2,600, 3,800) | 1,600                                | (1,400, 1,900)         | 34 | 1,600 | (1,400, 2,000) | 2a           |
| Cambodia                         | B   | 425,100   | (379,500, 476,300)     | 321,500                    | (287,000, 360,200)     | 76 | 5,700 | (5,100, 6,400)  | 218,700                                | (195,200, 245,000)     | 68 | 3,900 | (3,500, 4,400) | 102,900                              | (91,800, 115,200)      | 32 | 1,800 | (1,600, 2,000) | 3            |
|                                  | M   | 217,500   | (183,100, 258,300)     | 162,800                    | (137,100, 193,300)     | 75 | 6,600 | (5,600, 7,800)  | 117,900                                | (99,300, 140,000)      | 72 | 4,800 | (4,100, 5,800) | 44,900                               | (37,800, 53,300)       | 28 | 1,800 | (1,500, 2,100) | 3            |
|                                  | F   | 207,700   | (178,500, 241,600)     | 158,800                    | (136,500, 184,700)     | 76 | 5,000 | (4,300, 5,800)  | 100,800                                | (86,600, 117,200)      | 63 | 3,200 | (2,700, 3,700) | 58,000                               | (49,900, 67,500)       | 37 | 1,800 | (1,500, 2,100) | 3            |
| Indonesia                        | B   | 7,623,500 | (7,411,700, 7,841,400) | 6,025,200                  | (5,857,800, 6,197,400) | 79 | 5,100 | (4,900, 5,200)  | 3,527,300                              | (3,429,300, 3,628,200) | 59 | 3,000 | (2,900, 3,100) | 2,497,900                            | (2,428,500, 2,569,200) | 41 | 2,100 | (2,000, 2,200) | 3            |
|                                  | M   | 3,983,400 | (3,798,800, 4,177,000) | 3,110,900                  | (2,966,700, 3,262,100) | 78 | 5,300 | (5,100, 5,600)  | 1,775,200                              | (1,692,900, 1,861,400) | 57 | 3,100 | (2,900, 3,200) | 1,335,700                            | (1,273,800, 1,400,600) | 43 | 2,300 | (2,200, 2,400) | 3            |
|                                  | F   | 3,640,100 | (3,514,800, 3,769,800) | 2,914,300                  | (2,814,000, 3,018,200) | 80 | 4,900 | (4,700, 5,000)  | 1,752,200                              | (1,691,900, 1,814,600) | 60 | 2,900 | (2,800, 3,000) | 1,162,100                            | (1,122,100, 1,203,600) | 40 | 1,900 | (1,900, 2,000) | 3            |
| Lao People's Democratic Republic | B   | 214,200   | (191,200, 239,900)     | 167,700                    | (149,700, 187,800)     | 78 | 7,200 | (6,500, 8,100)  | 116,600                                | (104,100, 130,600)     | 70 | 5,100 | (4,500, 5,700) | 51,100                               | (45,600, 57,200)       | 30 | 2,100 | (1,900, 2,400) | 3            |
|                                  | M   | 121,400   | (102,300, 144,200)     | 96,500                     | (81,300, 114,700)      | 79 | 8,500 | (7,100, 10,100) | 72,300                                 | (60,900, 85,800)       | 75 | 6,400 | (5,400, 7,600) | 24,300                               | (20,400, 28,800)       | 25 | 2,100 | (1,700, 2,400) | 3            |
|                                  | F   | 92,700    | (79,700, 107,900)      | 71,100                     | (61,100, 82,700)       | 77 | 6,000 | (5,200, 7,000)  | 44,300                                 | (38,100, 51,500)       | 62 | 3,800 | (3,300, 4,400) | 26,800                               | (23,000, 31,200)       | 38 | 2,200 | (1,900, 2,600) | 3            |
| Malaysia                         | B   | 874,100   | (858,500, 889,900)     | 633,500                    | (622,200, 644,900)     | 72 | 4,700 | (4,600, 4,700)  | 384,500                                | (377,600, 391,400)     | 61 | 2,900 | (2,800, 2,900) | 249,000                              | (244,600, 253,500)     | 39 | 1,800 | (1,800, 1,800) | 3            |
|                                  | M   | 448,800   | (437,200, 460,800)     | 314,700                    | (306,500, 323,000)     | 70 | 4,600 | (4,500, 4,700)  | 197,200                                | (192,100, 202,400)     | 63 | 2,900 | (2,800, 3,000) | 117,400                              | (114,400, 120,600)     | 37 | 1,700 | (1,600, 1,700) | 3            |
|                                  | F   | 425,200   | (414,900, 435,900)     | 318,800                    | (311,000, 326,800)     | 75 | 4,800 | (4,600, 4,900)  | 187,200                                | (182,700, 191,900)     | 59 | 2,800 | (2,700, 2,900) | 131,600                              | (128,400, 134,900)     | 41 | 1,900 | (1,900, 2,000) | 3            |

| Country     | Sex | Total YLL |                        | Premature cancer mortality |                        |    |       |                | Premature preventable cancer mortality |                        |    |       |                | Premature treatable cancer mortality |                    |    |       |                | Data Quality |
|-------------|-----|-----------|------------------------|----------------------------|------------------------|----|-------|----------------|----------------------------------------|------------------------|----|-------|----------------|--------------------------------------|--------------------|----|-------|----------------|--------------|
|             |     | N         | UI                     | N                          | UI                     | %  | ASR   | UI             | N                                      | UI                     | %  | ASR   | UI             | N                                    | UI                 | %  | ASR   | UI             | Method       |
| Myanmar     | B   | 1,722,500 | (1,537,500, 1,929,700) | 1,391,400                  | (1,242,000, 1,558,700) | 81 | 6,000 | (5,300, 6,700) | 1,009,400                              | (901,000, 1,130,800)   | 73 | 4,300 | (3,900, 4,900) | 382,000                              | (341,000, 427,900) | 27 | 1,600 | (1,500, 1,800) | 3            |
|             | M   | 867,700   | (730,600, 1,030,500)   | 704,000                    | (592,800, 836,100)     | 81 | 6,700 | (5,700, 8,000) | 511,200                                | (430,500, 607,100)     | 73 | 4,900 | (4,100, 5,800) | 192,800                              | (162,300, 229,000) | 27 | 1,800 | (1,500, 2,200) | 3            |
|             | F   | 854,800   | (734,800, 994,400)     | 687,300                    | (590,900, 799,600)     | 80 | 5,400 | (4,600, 6,300) | 498,100                                | (428,200, 579,500)     | 72 | 3,900 | (3,400, 4,500) | 189,200                              | (162,600, 220,100) | 28 | 1,500 | (1,300, 1,700) | 3            |
| Philippines | B   | 2,712,900 | (2,687,700, 2,738,300) | 1,934,000                  | (1,916,100, 1,952,100) | 71 | 5,000 | (4,900, 5,000) | 1,249,800                              | (1,238,200, 1,261,500) | 65 | 3,300 | (3,200, 3,300) | 684,200                              | (677,900, 690,600) | 35 | 1,700 | (1,700, 1,700) | 3            |
|             | M   | 1,364,000 | (1,345,200, 1,383,100) | 953,500                    | (940,300, 966,800)     | 70 | 5,100 | (5,100, 5,200) | 658,300                                | (649,200, 667,500)     | 69 | 3,600 | (3,500, 3,600) | 295,200                              | (291,100, 299,300) | 31 | 1,600 | (1,500, 1,600) | 3            |
|             | F   | 1,348,900 | (1,332,100, 1,365,900) | 980,500                    | (968,300, 992,900)     | 73 | 4,900 | (4,800, 4,900) | 591,500                                | (584,200, 599,000)     | 60 | 3,000 | (2,900, 3,000) | 389,000                              | (384,200, 393,900) | 40 | 1,900 | (1,900, 1,900) | 3            |
| Singapore   | B   | 292,600   | (284,900, 300,400)     | 202,200                    | (196,900, 207,600)     | 69 | 4,800 | (4,700, 4,900) | 134,700                                | (131,200, 138,400)     | 67 | 3,200 | (3,100, 3,300) | 67,400                               | (65,700, 69,300)   | 33 | 1,600 | (1,600, 1,700) | 2a           |
|             | M   | 170,300   | (164,300, 176,500)     | 118,400                    | (114,200, 122,700)     | 70 | 5,200 | (5,000, 5,400) | 83,200                                 | (80,300, 86,200)       | 70 | 3,600 | (3,500, 3,700) | 35,200                               | (33,900, 36,500)   | 30 | 1,600 | (1,500, 1,600) | 2a           |
|             | F   | 122,300   | (117,600, 127,200)     | 83,800                     | (80,600, 87,200)       | 69 | 4,400 | (4,200, 4,500) | 51,600                                 | (49,600, 53,600)       | 61 | 2,700 | (2,600, 2,800) | 32,300                               | (31,000, 33,600)   | 39 | 1,700 | (1,600, 1,800) | 2a           |
| Thailand    | B   | 3,180,800 | (3,161,200, 3,200,500) | 2,212,000                  | (2,198,400, 2,225,700) | 70 | 5,200 | (5,200, 5,200) | 1,559,100                              | (1,549,500, 1,568,800) | 70 | 3,700 | (3,600, 3,700) | 652,900                              | (648,800, 656,900) | 30 | 1,600 | (1,500, 1,600) | 3            |
|             | M   | 1,735,700 | (1,720,500, 1,751,100) | 1,209,300                  | (1,198,700, 1,219,900) | 70 | 6,000 | (6,000, 6,100) | 903,300                                | (895,300, 911,200)     | 75 | 4,500 | (4,400, 4,500) | 306,000                              | (303,300, 308,700) | 25 | 1,500 | (1,500, 1,500) | 3            |
|             | F   | 1,445,100 | (1,432,600, 1,457,600) | 1,002,700                  | (994,100, 1,011,400)   | 69 | 4,500 | (4,500, 4,500) | 655,900                                | (650,200, 661,600)     | 65 | 2,900 | (2,900, 3,000) | 346,900                              | (343,900, 349,900) | 35 | 1,600 | (1,600, 1,600) | 3            |
| Timor Leste | B   | 16,200    | (14,400, 18,100)       | 11,500                     | (10,300, 12,900)       | 71 | 3,300 | (3,000, 3,700) | 7,200                                  | (6,400, 8,000)         | 62 | 2,100 | (1,900, 2,400) | 4,300                                | (3,900, 4,900)     | 38 | 1,200 | (1,100, 1,400) | 3            |
|             | M   | 7,900     | (6,700, 9,400)         | 5,400                      | (4,500, 6,400)         | 68 | 3,200 | (2,700, 3,800) | 3,400                                  | (2,800, 4,000)         | 62 | 2,000 | (1,700, 2,400) | 2,000                                | (1,700, 2,400)     | 38 | 1,200 | (1,000, 1,400) | 3            |
|             | F   | 8,200     | (7,100, 9,600)         | 6,100                      | (5,300, 7,100)         | 74 | 3,500 | (3,000, 4,100) | 3,800                                  | (3,300, 4,400)         | 62 | 2,200 | (1,900, 2,600) | 2,300                                | (2,000, 2,700)     | 38 | 1,300 | (1,100, 1,500) | 3            |
| Viet Nam    | B   | 3,912,800 | (3,829,300, 3,998,100) | 3,189,700                  | (3,121,600, 3,259,200) | 82 | 6,900 | (6,700, 7,000) | 2,320,200                              | (2,270,700, 2,370,800) | 73 | 5,000 | (4,900, 5,100) | 869,500                              | (850,900, 888,400) | 27 | 1,900 | (1,800, 1,900) | 3            |

| Country                   | Sex | Total YLL  |                          | Premature cancer mortality |                          |    |       |                | Premature preventable cancer mortality |                          |    |       |                | Premature treatable cancer mortality |                        |    |       |                | Data Quality |
|---------------------------|-----|------------|--------------------------|----------------------------|--------------------------|----|-------|----------------|----------------------------------------|--------------------------|----|-------|----------------|--------------------------------------|------------------------|----|-------|----------------|--------------|
|                           |     | N          | UI                       | N                          | UI                       | %  | ASR   | UI             | N                                      | UI                       | %  | ASR   | UI             | N                                    | UI                     | %  | ASR   | UI             | Method       |
|                           | M   | 2,455,200  | (2,380,400, 2,532,300)   | 2,055,800                  | (1,993,200, 2,120,400)   | 84 | 9,200 | (8,900, 9,500) | 1,593,500                              | (1,545,000, 1,643,600)   | 78 | 7,100 | (6,900, 7,400) | 462,300                              | (448,200, 476,800)     | 22 | 2,000 | (2,000, 2,100) | 3            |
|                           | F   | 1,457,600  | (1,414,400, 1,502,100)   | 1,133,800                  | (1,100,300, 1,168,500)   | 78 | 4,700 | (4,600, 4,900) | 726,700                                | (705,100, 748,800)       | 64 | 3,000 | (3,000, 3,100) | 407,200                              | (395,100, 419,600)     | 36 | 1,700 | (1,600, 1,700) | 3            |
| South Central Asia        |     |            |                          |                            |                          |    |       |                |                                        |                          |    |       |                |                                      |                        |    |       |                |              |
|                           | B   | 621,800    | (594,300, 650,500)       | 428,700                    | (409,700, 448,500)       | 69 | 5,100 | (4,900, 5,300) | 257,600                                | (246,200, 269,500)       | 60 | 3,100 | (3,000, 3,300) | 171,100                              | (163,500, 179,000)     | 40 | 1,900 | (1,900, 2,000) | 3            |
| Afghanistan               | M   | 301,800    | (282,700, 322,100)       | 202,000                    | (189,300, 215,700)       | 67 | 4,900 | (4,600, 5,300) | 121,400                                | (113,700, 129,600)       | 60 | 3,100 | (2,900, 3,300) | 80,700                               | (75,600, 86,100)       | 40 | 1,800 | (1,700, 2,000) | 3            |
|                           | F   | 320,000    | (300,600, 340,700)       | 226,600                    | (212,900, 241,200)       | 71 | 5,300 | (5,000, 5,600) | 136,200                                | (127,900, 145,000)       | 60 | 3,200 | (3,000, 3,400) | 90,400                               | (84,900, 96,200)       | 40 | 2,100 | (1,900, 2,200) | 3            |
|                           | B   | 3,702,000  | (3,538,500, 3,873,000)   | 3,062,300                  | (2,927,100, 3,203,800)   | 83 | 5,100 | (4,800, 5,300) | 2,039,900                              | (1,949,900, 2,134,200)   | 67 | 3,400 | (3,200, 3,500) | 1,022,400                            | (977,200, 1,069,600)   | 33 | 1,700 | (1,600, 1,800) | 3            |
| Bangladesh                | M   | 2,115,600  | (1,982,000, 2,258,300)   | 1,754,500                  | (1,643,600, 1,872,800)   | 83 | 5,700 | (5,400, 6,100) | 1,171,200                              | (1,097,200, 1,250,200)   | 67 | 3,800 | (3,600, 4,100) | 583,300                              | (546,400, 622,700)     | 33 | 1,900 | (1,800, 2,000) | 3            |
|                           | F   | 1,586,300  | (1,490,200, 1,688,700)   | 1,307,800                  | (1,228,500, 1,392,200)   | 82 | 4,300 | (4,100, 4,600) | 868,800                                | (816,100, 924,800)       | 66 | 2,900 | (2,700, 3,100) | 439,100                              | (412,400, 467,400)     | 34 | 1,400 | (1,400, 1,500) | 3            |
|                           | B   | 15,000     | (14,600, 15,400)         | 11,100                     | (10,800, 11,400)         | 74 | 4,200 | (4,100, 4,300) | 8,300                                  | (8,100, 8,500)           | 75 | 3,200 | (3,100, 3,300) | 2,800                                | (2,700, 2,900)         | 25 | 1,000 | (1,000, 1,000) | 3            |
| Bhutan                    | M   | 8,200      | (7,900, 8,600)           | 6,000                      | (5,800, 6,200)           | 73 | 4,300 | (4,100, 4,500) | 4,400                                  | (4,300, 4,600)           | 74 | 3,200 | (3,100, 3,300) | 1,600                                | (1,500, 1,700)         | 26 | 1,100 | (1,000, 1,100) | 3            |
|                           | F   | 6,800      | (6,500, 7,100)           | 5,100                      | (4,900, 5,300)           | 75 | 4,100 | (3,900, 4,300) | 3,900                                  | (3,700, 4,000)           | 76 | 3,200 | (3,000, 3,300) | 1,200                                | (1,200, 1,300)         | 24 | 900   | (900, 1,000)   | 3            |
|                           | B   | 28,487,300 | (28,188,500, 28,789,200) | 22,001,800                 | (21,771,100, 22,235,000) | 77 | 4,000 | (3,900, 4,000) | 13,255,300                             | (13,116,300, 13,395,800) | 60 | 2,400 | (2,400, 2,400) | 8,746,500                            | (8,654,800, 8,839,200) | 40 | 1,600 | (1,500, 1,600) | 3            |
| India                     | M   | 14,577,300 | (14,360,700, 14,797,200) | 10,999,900                 | (10,836,500, 11,165,900) | 75 | 3,900 | (3,800, 4,000) | 6,289,600                              | (6,196,200, 6,384,500)   | 57 | 2,200 | (2,200, 2,300) | 4,710,300                            | (4,640,300, 4,781,400) | 43 | 1,700 | (1,600, 1,700) | 3            |
|                           | F   | 13,910,000 | (13,705,000, 14,118,100) | 11,001,900                 | (10,839,700, 11,166,500) | 79 | 4,000 | (4,000, 4,100) | 6,965,700                              | (6,863,000, 7,069,900)   | 63 | 2,500 | (2,500, 2,600) | 4,036,200                            | (3,976,700, 4,096,600) | 37 | 1,500 | (1,400, 1,500) | 3            |
| Iran, Islamic Republic of | B   | 2,230,000  | (2,209,400, 2,250,700)   | 1,496,900                  | (1,483,100, 1,510,800)   | 67 | 4,100 | (4,100, 4,200) | 877,900                                | (869,800, 886,000)       | 59 | 2,500 | (2,500, 2,500) | 619,000                              | (613,300, 624,800)     | 41 | 1,700 | (1,600, 1,700) | 2a           |

| Country    | Sex | Total YLL |                        | Premature cancer mortality |                        |    |       |                | Premature preventable cancer mortality |                        |    |       |                | Premature treatable cancer mortality |                        |    |       |                | Data Quality |
|------------|-----|-----------|------------------------|----------------------------|------------------------|----|-------|----------------|----------------------------------------|------------------------|----|-------|----------------|--------------------------------------|------------------------|----|-------|----------------|--------------|
|            |     | N         | UI                     | N                          | UI                     | %  | ASR   | UI             | N                                      | UI                     | %  | ASR   | UI             | N                                    | UI                     | %  | ASR   | UI             | Method       |
| Kazakhstan | M   | 1,254,600 | (1,239,600, 1,269,600) | 817,500                    | (807,800, 827,300)     | 65 | 4,600 | (4,500, 4,600) | 491,300                                | (485,500, 497,200)     | 60 | 2,800 | (2,800, 2,900) | 326,200                              | (322,300, 330,100)     | 40 | 1,800 | (1,700, 1,800) | 2a           |
|            | F   | 975,400   | (961,300, 989,700)     | 679,400                    | (669,600, 689,400)     | 70 | 3,700 | (3,600, 3,800) | 386,600                                | (381,000, 392,200)     | 57 | 2,100 | (2,100, 2,200) | 292,900                              | (288,600, 297,200)     | 43 | 1,600 | (1,500, 1,600) | 2a           |
|            | B   | 634,900   | (624,000, 646,000)     | 500,800                    | (492,200, 509,500)     | 79 | 5,800 | (5,700, 5,900) | 337,200                                | (331,400, 343,000)     | 67 | 3,900 | (3,900, 4,000) | 163,600                              | (160,800, 166,500)     | 33 | 1,900 | (1,900, 1,900) | 2a           |
|            | M   | 339,300   | (331,400, 347,300)     | 269,600                    | (263,400, 276,100)     | 79 | 7,100 | (6,900, 7,200) | 190,700                                | (186,200, 195,200)     | 71 | 5,000 | (4,900, 5,100) | 79,000                               | (77,100, 80,900)       | 29 | 2,000 | (2,000, 2,100) | 2a           |
|            | F   | 295,700   | (288,200, 303,300)     | 231,200                    | (225,300, 237,100)     | 78 | 5,000 | (4,800, 5,100) | 146,500                                | (142,800, 150,300)     | 63 | 3,100 | (3,100, 3,200) | 84,700                               | (82,500, 86,800)       | 37 | 1,800 | (1,800, 1,900) | 2a           |
| Kyrgyzstan | B   | 151,800   | (146,500, 157,400)     | 120,000                    | (115,800, 124,400)     | 79 | 5,100 | (4,900, 5,200) | 84,500                                 | (81,600, 87,600)       | 70 | 3,600 | (3,500, 3,700) | 35,500                               | (34,200, 36,800)       | 30 | 1,500 | (1,400, 1,500) | 1            |
|            | M   | 80,400    | (76,500, 84,400)       | 63,600                     | (60,500, 66,800)       | 79 | 5,900 | (5,600, 6,200) | 46,400                                 | (44,100, 48,700)       | 73 | 4,400 | (4,200, 4,600) | 17,200                               | (16,400, 18,100)       | 27 | 1,500 | (1,500, 1,600) | 1            |
|            | F   | 71,500    | (67,800, 75,300)       | 56,500                     | (53,600, 59,500)       | 79 | 4,400 | (4,200, 4,700) | 38,200                                 | (36,200, 40,200)       | 68 | 3,000 | (2,800, 3,200) | 18,300                               | (17,300, 19,200)       | 32 | 1,400 | (1,300, 1,500) | 1            |
| Maldives   | B   | 8,600     | (8,300, 9,000)         | 7,100                      | (6,800, 7,400)         | 82 | 4,300 | (4,200, 4,500) | 4,100                                  | (4,000, 4,300)         | 58 | 2,600 | (2,500, 2,700) | 3,000                                | (2,800, 3,100)         | 42 | 1,700 | (1,600, 1,800) | 9            |
|            | M   | 5,300     | (5,000, 5,700)         | 4,200                      | (4,000, 4,500)         | 80 | 4,800 | (4,500, 5,100) | 2,300                                  | (2,200, 2,500)         | 54 | 2,800 | (2,600, 3,000) | 1,900                                | (1,800, 2,100)         | 46 | 2,000 | (1,900, 2,100) | 9            |
|            | F   | 3,300     | (3,100, 3,500)         | 2,900                      | (2,700, 3,000)         | 87 | 3,900 | (3,700, 4,100) | 1,800                                  | (1,700, 1,900)         | 64 | 2,500 | (2,400, 2,700) | 1,000                                | (1,000, 1,100)         | 36 | 1,400 | (1,300, 1,500) | 9            |
| Nepal      | B   | 441,800   | (422,300, 462,200)     | 318,400                    | (304,300, 333,100)     | 72 | 3,200 | (3,100, 3,400) | 203,300                                | (194,300, 212,600)     | 64 | 2,100 | (2,000, 2,200) | 115,100                              | (110,100, 120,500)     | 36 | 1,100 | (1,100, 1,200) | 3            |
|            | M   | 201,300   | (188,600, 214,900)     | 137,300                    | (128,700, 146,600)     | 68 | 3,200 | (3,000, 3,400) | 86,800                                 | (81,300, 92,700)       | 63 | 2,000 | (1,900, 2,200) | 50,500                               | (47,300, 53,900)       | 37 | 1,200 | (1,100, 1,200) | 3            |
|            | F   | 240,500   | (225,900, 256,000)     | 181,000                    | (170,100, 192,700)     | 75 | 3,300 | (3,100, 3,500) | 116,400                                | (109,400, 124,000)     | 64 | 2,100 | (2,000, 2,300) | 64,600                               | (60,700, 68,800)       | 36 | 1,100 | (1,100, 1,200) | 3            |
| Pakistan   | B   | 4,108,300 | (3,959,700, 4,262,500) | 3,074,600                  | (2,963,400, 3,190,000) | 75 | 4,700 | (4,600, 4,900) | 1,683,700                              | (1,622,800, 1,746,900) | 55 | 2,600 | (2,500, 2,700) | 1,390,900                            | (1,340,600, 1,443,100) | 45 | 2,100 | (2,000, 2,200) | 3            |
|            | M   | 2,135,100 | (2,022,600, 2,253,800) | 1,547,600                  | (1,466,100, 1,633,700) | 72 | 4,700 | (4,400, 4,900) | 837,100                                | (793,000, 883,700)     | 54 | 2,600 | (2,400, 2,700) | 710,500                              | (673,100, 750,000)     | 46 | 2,100 | (2,000, 2,200) | 3            |

| Country      | Sex | Total YLL |                        | Premature cancer mortality |                        |    |       | Premature preventable cancer mortality |         |                    |    |       | Premature treatable cancer mortality |         |                    |    |       | Data Quality   |        |
|--------------|-----|-----------|------------------------|----------------------------|------------------------|----|-------|----------------------------------------|---------|--------------------|----|-------|--------------------------------------|---------|--------------------|----|-------|----------------|--------|
|              |     | N         | UI                     | N                          | UI                     | %  | ASR   | UI                                     | N       | UI                 | %  | ASR   | UI                                   | N       | UI                 | %  | ASR   | UI             | Method |
| Sri Lanka    | F   | 1,973,200 | (1,876,400, 2,075,000) | 1,527,000                  | (1,452,100, 1,605,700) | 77 | 4,800 | (4,500, 5,000)                         | 846,600 | (805,100, 890,200) | 55 | 2,700 | (2,500, 2,800)                       | 680,400 | (647,000, 715,500) | 45 | 2,100 | (2,000, 2,200) | 3      |
|              | B   | 528,200   | (518,400, 538,200)     | 409,700                    | (402,100, 417,400)     | 78 | 3,800 | (3,700, 3,900)                         | 232,800 | (228,400, 237,200) | 57 | 2,100 | (2,100, 2,200)                       | 176,900 | (173,600, 180,200) | 43 | 1,700 | (1,600, 1,700) | 3      |
|              | M   | 271,500   | (264,200, 279,000)     | 208,200                    | (202,600, 213,900)     | 77 | 4,100 | (3,900, 4,200)                         | 117,900 | (114,700, 121,100) | 57 | 2,300 | (2,200, 2,300)                       | 90,300  | (87,900, 92,800)   | 43 | 1,800 | (1,700, 1,800) | 3      |
|              | F   | 256,700   | (250,200, 263,400)     | 201,500                    | (196,400, 206,700)     | 78 | 3,600 | (3,500, 3,700)                         | 114,900 | (112,000, 117,900) | 57 | 2,000 | (2,000, 2,100)                       | 86,600  | (84,400, 88,900)   | 43 | 1,500 | (1,500, 1,600) | 3      |
| Tajikistan   | B   | 135,000   | (129,800, 140,300)     | 100,500                    | (96,700, 104,500)      | 74 | 3,500 | (3,300, 3,600)                         | 69,200  | (66,500, 71,900)   | 69 | 2,400 | (2,300, 2,500)                       | 31,300  | (30,100, 32,600)   | 31 | 1,000 | (1,000, 1,100) | 2a     |
|              | M   | 65,000    | (61,600, 68,700)       | 46,300                     | (43,800, 48,900)       | 71 | 3,400 | (3,200, 3,600)                         | 31,400  | (29,800, 33,200)   | 68 | 2,400 | (2,300, 2,500)                       | 14,800  | (14,100, 15,700)   | 32 | 1,000 | (1,000, 1,100) | 2a     |
|              | F   | 70,000    | (66,200, 74,000)       | 54,300                     | (51,300, 57,400)       | 78 | 3,600 | (3,400, 3,800)                         | 37,800  | (35,700, 39,900)   | 70 | 2,500 | (2,400, 2,600)                       | 16,500  | (15,600, 17,400)   | 30 | 1,100 | (1,000, 1,100) | 2a     |
| Turkmenistan | B   | 158,800   | (152,400, 165,500)     | 125,000                    | (119,900, 130,300)     | 79 | 5,500 | (5,300, 5,700)                         | 80,100  | (76,900, 83,500)   | 64 | 3,600 | (3,400, 3,700)                       | 44,900  | (43,000, 46,800)   | 36 | 1,900 | (1,800, 2,000) | 1      |
|              | M   | 76,300    | (71,900, 80,900)       | 58,700                     | (55,300, 62,200)       | 77 | 5,700 | (5,400, 6,100)                         | 38,400  | (36,200, 40,700)   | 65 | 3,800 | (3,600, 4,100)                       | 20,300  | (19,200, 21,600)   | 35 | 1,900 | (1,800, 2,000) | 1      |
|              | F   | 82,500    | (77,800, 87,500)       | 66,300                     | (62,500, 70,300)       | 80 | 5,400 | (5,100, 5,700)                         | 41,800  | (39,400, 44,300)   | 63 | 3,400 | (3,200, 3,600)                       | 24,500  | (23,100, 26,000)   | 37 | 2,000 | (1,800, 2,100) | 1      |
| Uzbekistan   | B   | 731,800   | (719,900, 743,900)     | 569,700                    | (560,500, 579,200)     | 78 | 4,400 | (4,300, 4,500)                         | 345,700 | (340,100, 351,500) | 61 | 2,700 | (2,700, 2,700)                       | 224,000 | (220,300, 227,700) | 39 | 1,700 | (1,700, 1,700) | 1      |
|              | M   | 339,900   | (332,000, 348,000)     | 258,700                    | (252,700, 264,900)     | 76 | 4,300 | (4,200, 4,400)                         | 155,500 | (151,900, 159,200) | 60 | 2,600 | (2,600, 2,700)                       | 103,200 | (100,800, 105,700) | 40 | 1,700 | (1,600, 1,700) | 1      |
|              | F   | 391,900   | (383,100, 401,000)     | 311,000                    | (304,000, 318,200)     | 79 | 4,500 | (4,400, 4,600)                         | 190,300 | (186,000, 194,600) | 61 | 2,800 | (2,700, 2,800)                       | 120,800 | (118,100, 123,600) | 39 | 1,700 | (1,700, 1,800) | 1      |
| Western Asia |     |           |                        |                            |                        |    |       |                                        |         |                    |    |       |                                      |         |                    |    |       |                |        |
| Armenia      | B   | 153,700   | (149,000, 158,600)     | 109,100                    | (105,800, 112,600)     | 71 | 6,500 | (6,300, 6,700)                         | 68,700  | (66,600, 70,900)   | 63 | 4,100 | (4,000, 4,200)                       | 40,400  | (39,200, 41,700)   | 37 | 2,500 | (2,400, 2,500) | 1      |
|              | M   | 87,300    | (83,800, 91,000)       | 62,800                     | (60,300, 65,500)       | 72 | 8,600 | (8,300, 9,000)                         | 42,100  | (40,400, 43,900)   | 67 | 5,700 | (5,500, 6,000)                       | 20,700  | (19,900, 21,600)   | 33 | 2,900 | (2,800, 3,000) | 1      |
|              | F   | 66,300    | (63,300, 69,600)       | 46,300                     | (44,100, 48,500)       | 70 | 5,000 | (4,800, 5,200)                         | 26,600  | (25,400, 27,900)   | 58 | 2,900 | (2,700, 3,000)                       | 19,700  | (18,800, 20,600)   | 42 | 2,100 | (2,000, 2,200) | 1      |

| Country    | Sex | Total YLL |                    | Premature cancer mortality |                    |    |       |                | Premature preventable cancer mortality |                    |    |       |                | Premature treatable cancer mortality |                    |    |       |                | Data Quality |
|------------|-----|-----------|--------------------|----------------------------|--------------------|----|-------|----------------|----------------------------------------|--------------------|----|-------|----------------|--------------------------------------|--------------------|----|-------|----------------|--------------|
|            |     | N         | UI                 | N                          | UI                 | %  | ASR   | UI             | N                                      | UI                 | %  | ASR   | UI             | N                                    | UI                 | %  | ASR   | UI             | Method       |
| Azerbaijan | B   | 314,300   | (305,000, 323,900) | 255,900                    | (248,300, 263,700) | 81 | 5,100 | (5,000, 5,300) | 160,200                                | (155,500, 165,100) | 63 | 3,200 | (3,100, 3,300) | 95,600                               | (92,800, 98,600)   | 37 | 1,900 | (1,900, 2,000) | 3            |
|            | M   | 170,400   | (163,300, 177,900) | 138,600                    | (132,800, 144,700) | 81 | 5,900 | (5,600, 6,100) | 91,900                                 | (88,100, 96,000)   | 66 | 3,900 | (3,700, 4,100) | 46,700                               | (44,700, 48,700)   | 34 | 2,000 | (1,900, 2,100) | 3            |
|            | F   | 143,900   | (138,000, 150,100) | 117,200                    | (112,400, 122,300) | 81 | 4,500 | (4,300, 4,600) | 68,300                                 | (65,500, 71,200)   | 58 | 2,600 | (2,500, 2,700) | 48,900                               | (46,900, 51,000)   | 42 | 1,900 | (1,800, 1,900) | 3            |
| Bahrain    | B   | 18,100    | (16,300, 20,000)   | 14,300                     | (12,900, 15,900)   | 79 | 2,600 | (2,400, 2,900) | 8,200                                  | (7,400, 9,100)     | 57 | 1,600 | (1,400, 1,700) | 6,100                                | (5,500, 6,800)     | 43 | 1,100 | (1,000, 1,200) | 3            |
|            | M   | 9,000     | (7,700, 10,500)    | 6,500                      | (5,600, 7,600)     | 72 | 2,100 | (1,800, 2,400) | 3,700                                  | (3,200, 4,300)     | 57 | 1,300 | (1,100, 1,500) | 2,800                                | (2,400, 3,300)     | 43 | 800   | (700, 900)     | 3            |
|            | F   | 9,000     | (7,900, 10,400)    | 7,800                      | (6,800, 8,900)     | 86 | 3,600 | (3,100, 4,200) | 4,500                                  | (3,900, 5,100)     | 58 | 2,100 | (1,800, 2,400) | 3,300                                | (2,900, 3,800)     | 42 | 1,500 | (1,300, 1,700) | 3            |
| Georgia    | B   | 213,100   | (207,300, 219,200) | 152,100                    | (147,900, 156,400) | 71 | 6,500 | (6,300, 6,700) | 91,400                                 | (88,900, 94,000)   | 60 | 3,900 | (3,800, 4,000) | 60,600                               | (59,000, 62,400)   | 40 | 2,600 | (2,600, 2,700) | 1            |
|            | M   | 117,500   | (113,200, 122,000) | 84,800                     | (81,600, 88,000)   | 72 | 7,900 | (7,600, 8,200) | 54,500                                 | (52,500, 56,600)   | 64 | 5,100 | (4,900, 5,300) | 30,200                               | (29,100, 31,400)   | 36 | 2,900 | (2,700, 3,000) | 1            |
|            | F   | 95,600    | (91,700, 99,700)   | 67,300                     | (64,600, 70,200)   | 70 | 5,500 | (5,200, 5,700) | 36,900                                 | (35,400, 38,500)   | 55 | 3,000 | (2,900, 3,100) | 30,400                               | (29,200, 31,700)   | 45 | 2,500 | (2,400, 2,600) | 1            |
| Iraq       | B   | 681,000   | (669,900, 692,200) | 499,900                    | (491,800, 508,200) | 73 | 4,800 | (4,700, 4,900) | 241,000                                | (237,000, 245,000) | 48 | 2,400 | (2,300, 2,400) | 258,900                              | (254,700, 263,200) | 52 | 2,400 | (2,400, 2,500) | 3            |
|            | M   | 314,200   | (306,400, 322,200) | 218,400                    | (213,000, 223,900) | 69 | 4,600 | (4,400, 4,700) | 109,100                                | (106,400, 111,900) | 50 | 2,400 | (2,300, 2,500) | 109,300                              | (106,600, 112,100) | 50 | 2,200 | (2,100, 2,200) | 3            |
|            | F   | 366,700   | (358,900, 374,800) | 281,500                    | (275,500, 287,700) | 77 | 5,100 | (4,900, 5,200) | 131,900                                | (129,100, 134,800) | 47 | 2,400 | (2,300, 2,400) | 149,600                              | (146,400, 152,900) | 53 | 2,700 | (2,600, 2,700) | 3            |
| Israel     | B   | 278,400   | (272,500, 284,500) | 154,000                    | (150,700, 157,300) | 55 | 4,100 | (4,000, 4,200) | 92,600                                 | (90,700, 94,600)   | 60 | 2,400 | (2,400, 2,500) | 61,400                               | (60,100, 62,700)   | 40 | 1,600 | (1,600, 1,700) | 1            |
|            | M   | 146,200   | (142,000, 150,600) | 79,800                     | (77,500, 82,200)   | 55 | 4,300 | (4,200, 4,500) | 50,400                                 | (48,900, 51,900)   | 63 | 2,700 | (2,700, 2,800) | 29,400                               | (28,500, 30,300)   | 37 | 1,600 | (1,600, 1,600) | 1            |
|            | F   | 132,200   | (128,100, 136,400) | 74,200                     | (71,900, 76,600)   | 56 | 3,800 | (3,700, 4,000) | 42,200                                 | (40,900, 43,600)   | 57 | 2,200 | (2,100, 2,200) | 32,000                               | (31,000, 33,000)   | 43 | 1,700 | (1,600, 1,700) | 1            |
| Jordan     | B   | 200,700   | (194,900, 206,700) | 148,700                    | (144,300, 153,100) | 74 | 4,900 | (4,700, 5,000) | 80,500                                 | (78,100, 82,900)   | 54 | 2,700 | (2,600, 2,800) | 68,200                               | (66,200, 70,300)   | 46 | 2,200 | (2,100, 2,200) | 3            |

| Country   | Sex | Total YLL |                    | Premature cancer mortality |                    |    |       | Premature preventable cancer mortality |        |                  |    |       | Premature treatable cancer mortality |        |                  |    |       | Data Quality   |        |
|-----------|-----|-----------|--------------------|----------------------------|--------------------|----|-------|----------------------------------------|--------|------------------|----|-------|--------------------------------------|--------|------------------|----|-------|----------------|--------|
|           |     | N         | UI                 | N                          | UI                 | %  | ASR   | UI                                     | N      | UI               | %  | ASR   | UI                                   | N      | UI               | %  | ASR   | UI             | Method |
|           | M   | 102,900   | (98,500, 107,600)  | 73,200                     | (70,000, 76,500)   | 71 | 5,000 | (4,700, 5,200)                         | 41,700 | (39,900, 43,600) | 57 | 2,900 | (2,800, 3,000)                       | 31,500 | (30,100, 32,900) | 43 | 2,000 | (1,900, 2,100) | 3      |
|           | F   | 97,800    | (94,000, 101,700)  | 75,500                     | (72,500, 78,500)   | 77 | 4,800 | (4,600, 5,000)                         | 38,700 | (37,200, 40,300) | 51 | 2,500 | (2,400, 2,600)                       | 36,700 | (35,300, 38,200) | 49 | 2,300 | (2,200, 2,400) | 3      |
| Kuwait    | B   | 54,900    | (52,000, 58,000)   | 43,600                     | (41,300, 46,100)   | 79 | 2,400 | (2,200, 2,500)                         | 23,500 | (22,200, 24,800) | 54 | 1,300 | (1,200, 1,400)                       | 20,200 | (19,100, 21,300) | 46 | 1,000 | (1,000, 1,100) | 3      |
|           | M   | 29,700    | (27,300, 32,300)   | 23,000                     | (21,200, 25,000)   | 78 | 2,000 | (1,800, 2,200)                         | 12,700 | (11,700, 13,800) | 55 | 1,100 | (1,100, 1,200)                       | 10,400 | (9,500, 11,300)  | 45 | 800   | (800, 900)     | 3      |
|           | F   | 25,200    | (23,400, 27,100)   | 20,600                     | (19,100, 22,100)   | 82 | 3,100 | (2,800, 3,300)                         | 10,800 | (10,000, 11,600) | 52 | 1,600 | (1,500, 1,800)                       | 9,800  | (9,100, 10,600)  | 48 | 1,400 | (1,300, 1,500) | 3      |
|           | B   | 179,800   | (174,900, 184,800) | 128,900                    | (125,300, 132,500) | 72 | 4,500 | (4,300, 4,600)                         | 70,900 | (69,000, 72,900) | 55 | 2,500 | (2,400, 2,500)                       | 58,000 | (56,400, 59,600) | 45 | 2,000 | (1,900, 2,000) | 3      |
| Lebanon   | M   | 91,300    | (87,800, 94,900)   | 61,500                     | (59,200, 64,000)   | 67 | 4,100 | (4,000, 4,300)                         | 34,300 | (33,000, 35,700) | 56 | 2,300 | (2,200, 2,400)                       | 27,200 | (26,200, 28,300) | 44 | 1,800 | (1,700, 1,900) | 3      |
|           | F   | 88,500    | (85,100, 92,000)   | 67,300                     | (64,700, 70,000)   | 76 | 4,900 | (4,700, 5,100)                         | 36,600 | (35,200, 38,000) | 54 | 2,700 | (2,600, 2,800)                       | 30,800 | (29,600, 32,000) | 46 | 2,200 | (2,100, 2,300) | 3      |
| Oman      | B   | 77,200    | (71,800, 83,100)   | 64,600                     | (60,100, 69,500)   | 84 | 4,100 | (3,800, 4,400)                         | 33,600 | (31,300, 36,200) | 52 | 2,300 | (2,100, 2,400)                       | 31,000 | (28,800, 33,300) | 48 | 1,800 | (1,700, 1,900) | 3      |
|           | M   | 51,400    | (45,600, 57,900)   | 43,200                     | (38,400, 48,800)   | 84 | 4,200 | (3,700, 4,700)                         | 22,000 | (19,500, 24,800) | 51 | 2,300 | (2,100, 2,600)                       | 21,300 | (18,900, 24,000) | 49 | 1,900 | (1,700, 2,100) | 3      |
|           | F   | 25,900    | (23,600, 28,400)   | 21,400                     | (19,500, 23,400)   | 83 | 4,000 | (3,600, 4,400)                         | 11,600 | (10,600, 12,800) | 54 | 2,300 | (2,100, 2,500)                       | 9,700  | (8,900, 10,700)  | 46 | 1,700 | (1,600, 1,900) | 3      |
| Palestine | B   | 93,900    | (77,900, 113,300)  | 65,600                     | (54,300, 79,100)   | 70 | 5,300 | (4,400, 6,300)                         | 35,300 | (29,200, 42,600) | 54 | 2,900 | (2,400, 3,500)                       | 30,300 | (25,100, 36,500) | 46 | 2,300 | (1,900, 2,800) | 3      |
|           | M   | 47,500    | (35,500, 63,700)   | 31,400                     | (23,400, 42,000)   | 66 | 5,300 | (3,900, 7,100)                         | 18,100 | (13,500, 24,300) | 58 | 3,200 | (2,400, 4,300)                       | 13,200 | (9,900, 17,700)  | 42 | 2,100 | (1,600, 2,800) | 3      |
|           | F   | 46,400    | (36,300, 59,200)   | 34,200                     | (26,800, 43,600)   | 74 | 5,300 | (4,100, 6,700)                         | 17,200 | (13,400, 21,900) | 50 | 2,700 | (2,100, 3,500)                       | 17,000 | (13,300, 21,700) | 50 | 2,600 | (2,000, 3,300) | 3      |
| Qatar     | B   | 23,100    | (19,100, 27,800)   | 18,600                     | (15,400, 22,400)   | 80 | 2,200 | (1,900, 2,700)                         | 9,700  | (8,000, 11,700)  | 52 | 1,300 | (1,000, 1,500)                       | 8,900  | (7,400, 10,700)  | 48 | 1,000 | (800, 1,200)   | 3      |
|           | M   | 15,400    | (11,500, 20,700)   | 12,300                     | (9,200, 16,500)    | 80 | 2,000 | (1,500, 2,600)                         | 6,600  | (4,900, 8,800)   | 53 | 1,100 | (900, 1,500)                         | 5,800  | (4,300, 7,800)   | 47 | 800   | (600, 1,100)   | 3      |

| Country              | Sex | Total YLL |                        | Premature cancer mortality |                        |    |       |                | Premature preventable cancer mortality |                        |    |       |                | Premature treatable cancer mortality |                    |    |       |                | Data Quality |
|----------------------|-----|-----------|------------------------|----------------------------|------------------------|----|-------|----------------|----------------------------------------|------------------------|----|-------|----------------|--------------------------------------|--------------------|----|-------|----------------|--------------|
|                      |     | N         | UI                     | N                          | UI                     | %  | ASR   | UI             | N                                      | UI                     | %  | ASR   | UI             | N                                    | UI                 | %  | ASR   | UI             | Method       |
| Saudi Arabia         | F   | 7,600     | (6,000, 9,800)         | 6,200                      | (4,900, 8,000)         | 82 | 3,300 | (2,600, 4,200) | 3,100                                  | (2,500, 4,000)         | 50 | 1,700 | (1,300, 2,200) | 3,100                                | (2,400, 3,900)     | 50 | 1,600 | (1,300, 2,100) | 3            |
|                      | B   | 456,700   | (448,200, 465,400)     | 355,000                    | (348,400, 361,800)     | 78 | 2,600 | (2,500, 2,600) | 183,300                                | (179,900, 186,800)     | 52 | 1,400 | (1,400, 1,400) | 171,700                              | (168,500, 175,000) | 48 | 1,200 | (1,100, 1,200) | 3            |
|                      | M   | 265,400   | (258,200, 272,900)     | 208,300                    | (202,600, 214,200)     | 78 | 2,500 | (2,400, 2,500) | 110,900                                | (107,900, 114,100)     | 53 | 1,400 | (1,400, 1,400) | 97,400                               | (94,700, 100,100)  | 47 | 1,100 | (1,000, 1,100) | 3            |
|                      | F   | 191,300   | (186,400, 196,200)     | 146,700                    | (143,000, 150,500)     | 77 | 2,800 | (2,700, 2,900) | 72,400                                 | (70,500, 74,200)       | 49 | 1,500 | (1,400, 1,500) | 74,300                               | (72,500, 76,300)   | 51 | 1,400 | (1,300, 1,400) | 3            |
| Syrian Arab Republic | B   | 413,800   | (343,000, 499,200)     | 307,600                    | (255,000, 371,100)     | 74 | 5,300 | (4,400, 6,400) | 154,900                                | (128,400, 186,900)     | 50 | 2,700 | (2,300, 3,300) | 152,700                              | (126,600, 184,300) | 50 | 2,600 | (2,100, 3,100) | 3            |
|                      | M   | 192,500   | (143,600, 258,000)     | 134,000                    | (99,900, 179,500)      | 70 | 5,000 | (3,700, 6,700) | 69,300                                 | (51,700, 92,900)       | 52 | 2,700 | (2,000, 3,600) | 64,700                               | (48,200, 86,700)   | 48 | 2,300 | (1,700, 3,100) | 3            |
|                      | F   | 221,300   | (173,400, 282,600)     | 173,700                    | (136,000, 221,700)     | 78 | 5,700 | (4,400, 7,300) | 85,600                                 | (67,000, 109,300)      | 49 | 2,800 | (2,200, 3,600) | 88,100                               | (69,000, 112,400)  | 51 | 2,900 | (2,200, 3,700) | 3            |
| Turkey               | B   | 3,318,500 | (3,296,500, 3,340,600) | 2,235,100                  | (2,220,300, 2,250,000) | 67 | 5,900 | (5,900, 6,000) | 1,537,000                              | (1,526,800, 1,547,200) | 69 | 4,100 | (4,100, 4,100) | 698,100                              | (693,500, 702,800) | 31 | 1,800 | (1,800, 1,900) | 2a           |
|                      | M   | 2,037,200 | (2,020,100, 2,054,500) | 1,360,300                  | (1,348,900, 1,371,900) | 67 | 7,800 | (7,700, 7,800) | 1,012,600                              | (1,004,100, 1,021,200) | 74 | 5,800 | (5,800, 5,900) | 347,700                              | (344,800, 350,700) | 26 | 2,000 | (1,900, 2,000) | 2a           |
|                      | F   | 1,281,300 | (1,267,500, 1,295,200) | 874,700                    | (865,400, 884,200)     | 68 | 4,400 | (4,300, 4,400) | 524,400                                | (518,700, 530,000)     | 60 | 2,600 | (2,600, 2,700) | 350,400                              | (346,600, 354,200) | 40 | 1,800 | (1,700, 1,800) | 2a           |
| United Arab Emirates | B   | 63,300    | (59,000, 68,000)       | 50,100                     | (46,700, 53,700)       | 79 | 1,900 | (1,800, 2,000) | 26,300                                 | (24,500, 28,200)       | 53 | 1,000 | (1,000, 1,100) | 23,800                               | (22,200, 25,500)   | 47 | 900   | (800, 900)     | 3            |
|                      | M   | 32,800    | (29,500, 36,500)       | 25,000                     | (22,500, 27,800)       | 76 | 1,400 | (1,200, 1,500) | 13,100                                 | (11,800, 14,600)       | 53 | 800   | (700, 800)     | 11,900                               | (10,700, 13,200)   | 47 | 600   | (500, 700)     | 3            |
|                      | F   | 30,500    | (27,800, 33,600)       | 25,100                     | (22,800, 27,600)       | 82 | 3,400 | (3,100, 3,700) | 13,200                                 | (12,000, 14,500)       | 52 | 1,800 | (1,700, 2,000) | 11,900                               | (10,800, 13,100)   | 48 | 1,600 | (1,400, 1,700) | 3            |
| Yemen                | B   | 452,100   | (412,100, 495,900)     | 290,400                    | (264,700, 318,600)     | 64 | 4,100 | (3,700, 4,500) | 145,100                                | (132,200, 159,200)     | 50 | 2,200 | (2,000, 2,400) | 145,400                              | (132,500, 159,500) | 50 | 2,000 | (1,800, 2,100) | 3            |
|                      | M   | 212,800   | (186,400, 242,900)     | 127,600                    | (111,800, 145,700)     | 60 | 3,900 | (3,400, 4,400) | 63,600                                 | (55,700, 72,600)       | 50 | 2,000 | (1,800, 2,300) | 64,000                               | (56,100, 73,100)   | 50 | 1,800 | (1,600, 2,100) | 3            |
|                      | F   | 239,300   | (210,200, 272,400)     | 162,800                    | (143,000, 185,300)     | 68 | 4,400 | (3,800, 5,000) | 81,500                                 | (71,600, 92,800)       | 50 | 2,300 | (2,000, 2,600) | 81,300                               | (71,400, 92,600)   | 50 | 2,100 | (1,800, 2,400) | 3            |



| Country        | Sex | Total YLL |                    | Premature cancer mortality |                    |    |        |                  | Premature preventable cancer mortality |                    |    |       |                | Premature treatable cancer mortality |                    |    |       |                | Data Quality |
|----------------|-----|-----------|--------------------|----------------------------|--------------------|----|--------|------------------|----------------------------------------|--------------------|----|-------|----------------|--------------------------------------|--------------------|----|-------|----------------|--------------|
|                |     | N         | UI                 | N                          | UI                 | %  | ASR    | UI               | N                                      | UI                 | %  | ASR   | UI             | N                                    | UI                 | %  | ASR   | UI             | Method       |
| Eastern Europe |     |           |                    |                            |                    |    |        |                  |                                        |                    |    |       |                |                                      |                    |    |       |                |              |
| Belarus        | B   | 559,700   | (550,800, 568,600) | 429,300                    | (422,500, 436,200) | 77 | 6,900  | (6,800, 7,000)   | 269,300                                | (265,100, 273,600) | 63 | 4,300 | (4,300, 4,400) | 160,000                              | (157,500, 162,500) | 37 | 2,600 | (2,600, 2,600) | 2a           |
|                | M   | 347,000   | (339,900, 354,300) | 278,000                    | (272,400, 283,800) | 80 | 10,100 | (9,900, 10,300)  | 184,500                                | (180,700, 188,300) | 66 | 6,600 | (6,500, 6,800) | 93,600                               | (91,700, 95,500)   | 34 | 3,400 | (3,400, 3,500) | 2a           |
|                | F   | 212,600   | (207,400, 218,000) | 151,200                    | (147,500, 155,100) | 71 | 4,500  | (4,400, 4,600)   | 84,900                                 | (82,800, 87,000)   | 56 | 2,500 | (2,500, 2,600) | 66,400                               | (64,700, 68,100)   | 44 | 2,000 | (1,900, 2,000) | 2a           |
| Bulgaria       | B   | 471,400   | (463,100, 480,000) | 310,600                    | (305,100, 316,200) | 66 | 7,000  | (6,800, 7,100)   | 199,200                                | (195,700, 202,800) | 64 | 4,500 | (4,400, 4,500) | 111,400                              | (109,400, 113,400) | 36 | 2,500 | (2,500, 2,500) | 1            |
|                | M   | 273,900   | (267,600, 280,300) | 184,100                    | (179,900, 188,500) | 67 | 8,400  | (8,200, 8,600)   | 121,100                                | (118,300, 124,000) | 66 | 5,500 | (5,400, 5,600) | 63,000                               | (61,600, 64,500)   | 34 | 2,900 | (2,800, 3,000) | 1            |
|                | F   | 197,500   | (192,000, 203,200) | 126,500                    | (123,000, 130,100) | 64 | 5,700  | (5,500, 5,900)   | 78,100                                 | (76,000, 80,400)   | 62 | 3,500 | (3,400, 3,600) | 48,300                               | (47,000, 49,700)   | 38 | 2,200 | (2,100, 2,200) | 1            |
| Czechia        | B   | 605,500   | (596,700, 614,400) | 349,700                    | (344,600, 354,800) | 58 | 5,100  | (5,000, 5,200)   | 221,100                                | (217,900, 224,300) | 63 | 3,200 | (3,200, 3,300) | 128,600                              | (126,800, 130,500) | 37 | 1,900 | (1,900, 1,900) | 1            |
|                | M   | 342,300   | (335,800, 349,000) | 204,700                    | (200,800, 208,700) | 60 | 6,100  | (6,000, 6,200)   | 130,000                                | (127,500, 132,500) | 63 | 3,800 | (3,800, 3,900) | 74,800                               | (73,300, 76,200)   | 37 | 2,200 | (2,200, 2,300) | 1            |
|                | F   | 263,100   | (257,400, 269,000) | 145,000                    | (141,800, 148,200) | 55 | 4,200  | (4,100, 4,300)   | 91,100                                 | (89,100, 93,100)   | 63 | 2,600 | (2,600, 2,700) | 53,900                               | (52,700, 55,100)   | 37 | 1,600 | (1,500, 1,600) | 1            |
| Hungary        | B   | 772,800   | (762,500, 783,100) | 505,200                    | (498,500, 512,000) | 65 | 8,000  | (7,900, 8,100)   | 343,300                                | (338,800, 347,900) | 68 | 5,400 | (5,300, 5,500) | 161,900                              | (159,800, 164,100) | 32 | 2,600 | (2,600, 2,600) | 1            |
|                | M   | 422,800   | (415,200, 430,700) | 286,800                    | (281,600, 292,100) | 68 | 9,700  | (9,500, 9,900)   | 194,500                                | (191,000, 198,100) | 68 | 6,500 | (6,400, 6,700) | 92,200                               | (90,600, 94,000)   | 32 | 3,200 | (3,100, 3,200) | 1            |
|                | F   | 349,900   | (343,100, 356,900) | 218,400                    | (214,200, 222,700) | 62 | 6,600  | (6,400, 6,700)   | 148,800                                | (145,900, 151,700) | 68 | 4,400 | (4,300, 4,500) | 69,700                               | (68,300, 71,000)   | 32 | 2,100 | (2,100, 2,200) | 1            |
| Moldova        | B   | 235,900   | (229,900, 242,100) | 189,300                    | (184,400, 194,200) | 80 | 7,600  | (7,400, 7,800)   | 119,200                                | (116,100, 122,300) | 63 | 4,700 | (4,600, 4,900) | 70,100                               | (68,300, 71,900)   | 37 | 2,800 | (2,700, 2,900) | 1            |
|                | M   | 144,100   | (139,400, 149,000) | 119,000                    | (115,100, 123,100) | 83 | 10,600 | (10,200, 11,000) | 76,700                                 | (74,100, 79,300)   | 64 | 6,800 | (6,600, 7,000) | 42,400                               | (41,000, 43,800)   | 36 | 3,800 | (3,700, 3,900) | 1            |
|                | F   | 91,800    | (88,100, 95,600)   | 70,200                     | (67,400, 73,200)   | 77 | 5,200  | (5,000, 5,400)   | 42,500                                 | (40,800, 44,300)   | 61 | 3,100 | (3,000, 3,300) | 27,700                               | (26,600, 28,900)   | 39 | 2,000 | (2,000, 2,100) | 1            |

| Country            | Sex | Total YLL |                        | Premature cancer mortality |                        |    |       |                | Premature preventable cancer mortality |                        |    |       |                | Premature treatable cancer mortality |                        |    |       |                | Data Quality |
|--------------------|-----|-----------|------------------------|----------------------------|------------------------|----|-------|----------------|----------------------------------------|------------------------|----|-------|----------------|--------------------------------------|------------------------|----|-------|----------------|--------------|
|                    |     | N         | UI                     | N                          | UI                     | %  | ASR   | UI             | N                                      | UI                     | %  | ASR   | UI             | N                                    | UI                     | %  | ASR   | UI             | Method       |
| Poland             | B   | 2,695,200 | (2,676,100, 2,714,400) | 1,702,200                  | (1,690,200, 1,714,400) | 63 | 6,900 | (6,800, 6,900) | 1,087,600                              | (1,079,900, 1,095,300) | 64 | 4,400 | (4,300, 4,400) | 614,600                              | (610,300, 619,000)     | 36 | 2,500 | (2,500, 2,500) | 1            |
|                    | M   | 1,509,200 | (1,494,800, 1,523,700) | 971,200                    | (961,900, 980,500)     | 64 | 8,200 | (8,100, 8,200) | 618,100                                | (612,200, 624,000)     | 64 | 5,200 | (5,100, 5,200) | 353,100                              | (349,700, 356,500)     | 36 | 3,000 | (3,000, 3,000) | 1            |
|                    | F   | 1,186,000 | (1,173,400, 1,198,700) | 731,000                    | (723,300, 738,900)     | 62 | 5,800 | (5,700, 5,800) | 469,500                                | (464,500, 474,600)     | 64 | 3,700 | (3,600, 3,700) | 261,500                              | (258,700, 264,300)     | 36 | 2,100 | (2,100, 2,100) | 1            |
| Romania            | B   | 1,350,000 | (1,336,400, 1,363,800) | 928,100                    | (918,700, 937,600)     | 69 | 7,600 | (7,500, 7,600) | 603,900                                | (597,800, 610,000)     | 65 | 4,900 | (4,800, 4,900) | 324,200                              | (320,900, 327,500)     | 35 | 2,700 | (2,600, 2,700) | 1            |
|                    | M   | 809,500   | (798,800, 820,300)     | 574,200                    | (566,700, 581,900)     | 71 | 9,700 | (9,600, 9,900) | 379,300                                | (374,300, 384,300)     | 66 | 6,400 | (6,300, 6,500) | 195,000                              | (192,400, 197,600)     | 34 | 3,300 | (3,300, 3,400) | 1            |
|                    | F   | 540,600   | (532,000, 549,200)     | 353,800                    | (348,200, 359,500)     | 65 | 5,600 | (5,500, 5,700) | 224,600                                | (221,100, 228,200)     | 63 | 3,600 | (3,500, 3,600) | 129,200                              | (127,200, 131,300)     | 37 | 2,100 | (2,000, 2,100) | 1            |
| Russian Federation | B   | 8,086,900 | (8,050,100, 8,124,000) | 5,893,600                  | (5,866,700, 5,920,600) | 73 | 6,400 | (6,400, 6,400) | 3,810,900                              | (3,793,600, 3,828,400) | 65 | 4,100 | (4,100, 4,200) | 2,082,700                            | (2,073,200, 2,092,200) | 35 | 2,300 | (2,300, 2,300) | 1            |
|                    | M   | 4,483,600 | (4,455,500, 4,511,800) | 3,405,800                  | (3,384,500, 3,427,200) | 76 | 8,400 | (8,400, 8,500) | 2,313,200                              | (2,298,700, 2,327,800) | 68 | 5,700 | (5,700, 5,700) | 1,092,600                            | (1,085,800, 1,099,500) | 32 | 2,700 | (2,700, 2,700) | 1            |
|                    | F   | 3,603,300 | (3,579,400, 3,627,500) | 2,487,800                  | (2,471,300, 2,504,500) | 69 | 5,000 | (5,000, 5,000) | 1,497,700                              | (1,487,800, 1,507,700) | 60 | 3,000 | (3,000, 3,000) | 990,100                              | (983,500, 996,700)     | 40 | 2,000 | (2,000, 2,000) | 1            |
| Slovakia           | B   | 375,000   | (367,700, 382,400)     | 236,800                    | (232,200, 241,500)     | 63 | 6,700 | (6,600, 6,900) | 140,900                                | (138,100, 143,600)     | 59 | 4,000 | (3,900, 4,100) | 95,900                               | (94,000, 97,800)       | 41 | 2,700 | (2,700, 2,800) | 1            |
|                    | M   | 217,600   | (212,000, 223,300)     | 143,400                    | (139,700, 147,100)     | 66 | 8,500 | (8,300, 8,700) | 85,800                                 | (83,600, 88,000)       | 60 | 5,100 | (4,900, 5,200) | 57,600                               | (56,100, 59,100)       | 40 | 3,400 | (3,300, 3,500) | 1            |
|                    | F   | 157,400   | (152,800, 162,100)     | 93,400                     | (90,600, 96,200)       | 59 | 5,100 | (5,000, 5,300) | 55,100                                 | (53,500, 56,700)       | 59 | 3,000 | (2,900, 3,100) | 38,300                               | (37,200, 39,500)       | 41 | 2,100 | (2,000, 2,200) | 1            |
| Ukraine            | B   | 2,318,200 | (2,299,100, 2,337,500) | 1,751,000                  | (1,736,600, 1,765,600) | 76 | 6,400 | (6,300, 6,400) | 1,079,100                              | (1,070,200, 1,088,100) | 62 | 3,900 | (3,900, 3,900) | 671,900                              | (666,400, 677,500)     | 38 | 2,500 | (2,400, 2,500) | 1            |
|                    | M   | 1,325,100 | (1,310,900, 1,339,400) | 1,022,800                  | (1,011,800, 1,033,800) | 77 | 8,400 | (8,300, 8,500) | 653,900                                | (646,900, 661,000)     | 64 | 5,400 | (5,300, 5,400) | 368,900                              | (364,900, 372,900)     | 36 | 3,000 | (3,000, 3,100) | 1            |
|                    | F   | 993,100   | (980,500, 1,005,900)   | 728,300                    | (719,000, 737,600)     | 73 | 4,900 | (4,800, 4,900) | 425,200                                | (419,900, 430,700)     | 58 | 2,800 | (2,800, 2,900) | 303,000                              | (299,200, 306,900)     | 42 | 2,000 | (2,000, 2,000) | 1            |
| Northern Europe    |     |           |                        |                            |                        |    |       |                |                                        |                        |    |       |                |                                      |                        |    |       |                |              |

| Country | Sex | Total YLL |                    | Premature cancer mortality |                    |    |       |                | Premature preventable cancer mortality |                    |    |       |                | Premature treatable cancer mortality |                  |    |       |                | Data Quality |
|---------|-----|-----------|--------------------|----------------------------|--------------------|----|-------|----------------|----------------------------------------|--------------------|----|-------|----------------|--------------------------------------|------------------|----|-------|----------------|--------------|
|         |     | N         | UI                 | N                          | UI                 | %  | ASR   | UI             | N                                      | UI                 | %  | ASR   | UI             | N                                    | UI               | %  | ASR   | UI             | Method       |
| Denmark | B   | 350,100   | (343,500, 356,900) | 174,600                    | (171,300, 178,000) | 50 | 5,000 | (4,900, 5,100) | 112,600                                | (110,500, 114,800) | 65 | 3,200 | (3,100, 3,200) | 62,000                               | (60,800, 63,200) | 35 | 1,800 | (1,800, 1,800) | 1            |
|         | M   | 185,700   | (181,000, 190,600) | 90,600                     | (88,200, 93,000)   | 49 | 5,100 | (5,000, 5,300) | 57,400                                 | (55,900, 58,900)   | 63 | 3,200 | (3,100, 3,300) | 33,200                               | (32,300, 34,000) | 37 | 1,900 | (1,900, 2,000) | 1            |
|         | F   | 164,400   | (159,800, 169,100) | 84,000                     | (81,700, 86,500)   | 51 | 4,800 | (4,700, 5,000) | 55,200                                 | (53,700, 56,800)   | 66 | 3,100 | (3,000, 3,200) | 28,800                               | (28,000, 29,600) | 34 | 1,700 | (1,600, 1,700) | 1            |
| Estonia | B   | 82,200    | (79,200, 85,400)   | 45,400                     | (43,700, 47,200)   | 55 | 5,400 | (5,200, 5,600) | 29,100                                 | (28,000, 30,200)   | 64 | 3,400 | (3,300, 3,600) | 16,300                               | (15,700, 17,000) | 36 | 1,900 | (1,900, 2,000) | 1            |
|         | M   | 46,400    | (44,100, 48,900)   | 27,200                     | (25,900, 28,700)   | 59 | 6,900 | (6,600, 7,300) | 18,000                                 | (17,100, 18,900)   | 66 | 4,600 | (4,400, 4,800) | 9,200                                | (8,800, 9,700)   | 34 | 2,400 | (2,200, 2,500) | 1            |
|         | F   | 35,800    | (33,800, 37,800)   | 18,200                     | (17,200, 19,200)   | 51 | 4,100 | (3,900, 4,400) | 11,100                                 | (10,500, 11,700)   | 61 | 2,500 | (2,400, 2,700) | 7,100                                | (6,700, 7,500)   | 39 | 1,600 | (1,500, 1,700) | 1            |
| Finland | B   | 266,800   | (261,300, 272,500) | 129,200                    | (126,500, 131,900) | 48 | 3,700 | (3,600, 3,700) | 80,000                                 | (78,300, 81,700)   | 62 | 2,200 | (2,200, 2,300) | 49,200                               | (48,200, 50,200) | 38 | 1,400 | (1,400, 1,500) | 1            |
|         | M   | 145,600   | (141,400, 149,800) | 70,700                     | (68,700, 72,800)   | 49 | 4,000 | (3,900, 4,100) | 45,000                                 | (43,700, 46,300)   | 64 | 2,500 | (2,400, 2,600) | 25,700                               | (24,900, 26,400) | 36 | 1,500 | (1,500, 1,500) | 1            |
|         | F   | 121,300   | (117,600, 125,100) | 58,500                     | (56,700, 60,300)   | 48 | 3,300 | (3,200, 3,400) | 35,000                                 | (33,900, 36,100)   | 60 | 2,000 | (1,900, 2,000) | 23,500                               | (22,800, 24,300) | 40 | 1,400 | (1,300, 1,400) | 1            |
| Iceland | B   | 12,700    | (11,500, 14,000)   | 6,600                      | (6,000, 7,300)     | 52 | 3,300 | (3,000, 3,700) | 4,100                                  | (3,700, 4,500)     | 62 | 2,100 | (1,900, 2,300) | 2,500                                | (2,300, 2,800)   | 38 | 1,300 | (1,200, 1,400) | 1            |
|         | M   | 6,800     | (5,900, 7,700)     | 3,400                      | (3,000, 3,900)     | 50 | 3,400 | (3,000, 3,900) | 2,100                                  | (1,800, 2,400)     | 62 | 2,100 | (1,800, 2,400) | 1,300                                | (1,100, 1,500)   | 38 | 1,300 | (1,100, 1,500) | 1            |
|         | F   | 5,900     | (5,100, 6,800)     | 3,200                      | (2,800, 3,700)     | 54 | 3,300 | (2,900, 3,800) | 2,000                                  | (1,700, 2,300)     | 62 | 2,000 | (1,800, 2,300) | 1,200                                | (1,100, 1,400)   | 38 | 1,300 | (1,100, 1,500) | 1            |
| Ireland | B   | 216,400   | (211,300, 221,700) | 114,600                    | (111,900, 117,400) | 53 | 4,200 | (4,100, 4,300) | 71,700                                 | (70,000, 73,400)   | 63 | 2,600 | (2,600, 2,700) | 42,900                               | (41,900, 43,900) | 37 | 1,600 | (1,600, 1,600) | 1            |
|         | M   | 112,100   | (108,500, 115,900) | 56,500                     | (54,600, 58,400)   | 50 | 4,200 | (4,100, 4,300) | 35,700                                 | (34,600, 36,900)   | 63 | 2,600 | (2,600, 2,700) | 20,700                               | (20,000, 21,400) | 37 | 1,600 | (1,500, 1,600) | 1            |
|         | F   | 104,300   | (100,700, 108,000) | 58,100                     | (56,100, 60,200)   | 56 | 4,300 | (4,100, 4,400) | 36,000                                 | (34,700, 37,300)   | 62 | 2,600 | (2,500, 2,700) | 22,200                               | (21,400, 23,000) | 38 | 1,600 | (1,600, 1,700) | 1            |
| Latvia  | B   | 129,500   | (125,400, 133,700) | 79,800                     | (77,200, 82,400)   | 62 | 6,500 | (6,300, 6,700) | 49,900                                 | (48,300, 51,500)   | 63 | 4,100 | (3,900, 4,200) | 29,900                               | (29,000, 30,900) | 37 | 2,400 | (2,400, 2,500) | 1            |

| Country         | Sex | Total YLL |                        | Premature cancer mortality |                        |    |       | Premature preventable cancer mortality |           |                        |    | Premature treatable cancer mortality |                |         |                    | Data Quality |       |                |        |
|-----------------|-----|-----------|------------------------|----------------------------|------------------------|----|-------|----------------------------------------|-----------|------------------------|----|--------------------------------------|----------------|---------|--------------------|--------------|-------|----------------|--------|
|                 |     | N         | UI                     | N                          | UI                     | %  | ASR   | UI                                     | N         | UI                     | %  | ASR                                  | UI             | N       | UI                 | %            | ASR   | UI             | Method |
|                 | M   | 70,300    | (67,300, 73,500)       | 45,300                     | (43,300, 47,300)       | 64 | 8,100 | (7,800, 8,500)                         | 29,400    | (28,100, 30,700)       | 65 | 5,300                                | (5,000, 5,500) | 15,900  | (15,200, 16,600)   | 35           | 2,800 | (2,700, 3,000) | 1      |
|                 | F   | 59,200    | (56,500, 62,000)       | 34,500                     | (32,900, 36,100)       | 58 | 5,300 | (5,100, 5,600)                         | 20,500    | (19,500, 21,400)       | 59 | 3,200                                | (3,000, 3,300) | 14,000  | (13,400, 14,700)   | 41           | 2,200 | (2,100, 2,300) | 1      |
| Lithuania       | B   | 185,300   | (180,500, 190,100)     | 116,600                    | (113,600, 119,700)     | 63 | 6,500 | (6,300, 6,700)                         | 73,000    | (71,200, 75,000)       | 63 | 4,100                                | (4,000, 4,200) | 43,600  | (42,500, 44,700)   | 37           | 2,500 | (2,400, 2,500) | 1      |
|                 | M   | 106,600   | (102,900, 110,400)     | 70,400                     | (68,000, 72,900)       | 66 | 8,600 | (8,300, 8,900)                         | 45,500    | (44,000, 47,100)       | 65 | 5,500                                | (5,300, 5,700) | 24,900  | (24,100, 25,800)   | 35           | 3,100 | (3,000, 3,200) | 1      |
|                 | F   | 78,700    | (75,700, 81,800)       | 46,200                     | (44,400, 48,000)       | 59 | 4,900 | (4,700, 5,100)                         | 27,500    | (26,500, 28,600)       | 60 | 2,900                                | (2,800, 3,000) | 18,700  | (18,000, 19,400)   | 40           | 2,000 | (1,900, 2,100) | 1      |
| Norway          | B   | 238,700   | (233,300, 244,200)     | 118,300                    | (115,600, 121,000)     | 50 | 3,700 | (3,700, 3,800)                         | 72,200    | (70,600, 73,900)       | 61 | 2,300                                | (2,200, 2,300) | 46,000  | (45,000, 47,100)   | 39           | 1,500 | (1,500, 1,500) | 1      |
|                 | M   | 127,500   | (123,600, 131,500)     | 61,800                     | (59,900, 63,700)       | 48 | 3,800 | (3,700, 3,900)                         | 37,200    | (36,100, 38,400)       | 60 | 2,300                                | (2,200, 2,300) | 24,600  | (23,800, 25,300)   | 40           | 1,500 | (1,500, 1,600) | 1      |
|                 | F   | 111,200   | (107,500, 114,900)     | 56,500                     | (54,700, 58,400)       | 51 | 3,700 | (3,600, 3,800)                         | 35,000    | (33,900, 36,200)       | 62 | 2,300                                | (2,200, 2,300) | 21,500  | (20,800, 22,200)   | 38           | 1,400 | (1,400, 1,500) | 1      |
| Sweden          | B   | 465,700   | (458,400, 473,200)     | 205,300                    | (202,100, 208,600)     | 44 | 3,500 | (3,500, 3,600)                         | 119,000   | (117,200, 120,900)     | 58 | 2,000                                | (2,000, 2,000) | 86,300  | (84,900, 87,600)   | 42           | 1,500 | (1,500, 1,500) | 1      |
|                 | M   | 242,600   | (237,400, 247,900)     | 102,600                    | (100,400, 104,900)     | 42 | 3,500 | (3,400, 3,500)                         | 57,900    | (56,600, 59,100)       | 56 | 1,900                                | (1,900, 2,000) | 44,800  | (43,800, 45,700)   | 44           | 1,500 | (1,500, 1,600) | 1      |
|                 | F   | 223,100   | (218,100, 228,300)     | 102,700                    | (100,400, 105,100)     | 46 | 3,600 | (3,500, 3,700)                         | 61,200    | (59,800, 62,600)       | 60 | 2,100                                | (2,100, 2,100) | 41,500  | (40,600, 42,500)   | 40           | 1,500 | (1,400, 1,500) | 1      |
| United Kingdom  | B   | 3,452,600 | (3,432,900, 3,472,400) | 1,606,700                  | (1,597,500, 1,615,900) | 47 | 4,100 | (4,100, 4,100)                         | 1,010,300 | (1,004,500, 1,016,100) | 63 | 2,500                                | (2,500, 2,600) | 596,400 | (593,000, 599,800) | 37           | 1,500 | (1,500, 1,600) | 1      |
|                 | M   | 1,825,300 | (1,811,500, 1,839,300) | 821,800                    | (815,500, 828,100)     | 45 | 4,200 | (4,200, 4,200)                         | 516,200   | (512,300, 520,200)     | 63 | 2,600                                | (2,600, 2,600) | 305,500 | (303,200, 307,900) | 37           | 1,600 | (1,600, 1,600) | 1      |
|                 | F   | 1,627,300 | (1,613,500, 1,641,200) | 784,900                    | (778,300, 791,600)     | 48 | 4,000 | (4,000, 4,000)                         | 494,000   | (489,900, 498,300)     | 63 | 2,500                                | (2,500, 2,500) | 290,900 | (288,400, 293,400) | 37           | 1,500 | (1,500, 1,500) | 1      |
| Southern Europe |     |           |                        |                            |                        |    |       |                                        |           |                        |    |                                      |                |         |                    |              |       |                |        |
| Albania         | B   | 98,800    | (94,000, 103,800)      | 62,900                     | (59,900, 66,100)       | 64 | 3,800 | (3,700, 4,000)                         | 40,700    | (38,700, 42,800)       | 65 | 2,400                                | (2,300, 2,600) | 22,200  | (21,100, 23,300)   | 35           | 1,400 | (1,300, 1,500) | 1      |

| Country               | Sex | Total YLL |                           | Premature cancer mortality |                           |    |       | Premature preventable cancer mortality |           |                           |    | Premature treatable cancer mortality |                   |         |                       | Data Quality |       |                   |        |
|-----------------------|-----|-----------|---------------------------|----------------------------|---------------------------|----|-------|----------------------------------------|-----------|---------------------------|----|--------------------------------------|-------------------|---------|-----------------------|--------------|-------|-------------------|--------|
|                       |     | N         | UI                        | N                          | UI                        | %  | ASR   | UI                                     | N         | UI                        | %  | ASR                                  | UI                | N       | UI                    | %            | ASR   | UI                | Method |
| Bosnia<br>Herzegovina | M   | 63,800    | (60,100,<br>67,800)       | 39,100                     | (36,900,<br>41,500)       | 61 | 4,700 | (4,500,<br>5,000)                      | 26,600    | (25,100,<br>28,300)       | 68 | 3,200                                | (3,000,<br>3,400) | 12,500  | (11,800,<br>13,300)   | 32           | 1,600 | (1,500,<br>1,700) | 1      |
|                       | F   | 34,900    | (32,000,<br>38,100)       | 23,800                     | (21,800,<br>25,900)       | 68 | 3,000 | (2,700,<br>3,300)                      | 14,100    | (12,900,<br>15,400)       | 59 | 1,800                                | (1,600,<br>1,900) | 9,700   | (8,900,<br>10,600)    | 41           | 1,200 | (1,100,<br>1,400) | 1      |
|                       | B   | 227,300   | (221,300,<br>233,500)     | 157,200                    | (153,000,<br>161,400)     | 69 | 6,900 | (6,700,<br>7,000)                      | 105,000   | (102,200,<br>107,800)     | 67 | 4,600                                | (4,400,<br>4,700) | 52,200  | (50,800,<br>53,600)   | 33           | 2,300 | (2,200,<br>2,400) | 2a     |
| Croatia               | M   | 136,300   | (131,700,<br>141,200)     | 95,900                     | (92,600,<br>99,300)       | 70 | 8,500 | (8,200,<br>8,800)                      | 67,300    | (65,000,<br>69,700)       | 70 | 5,900                                | (5,700,<br>6,100) | 28,600  | (27,600,<br>29,600)   | 30           | 2,600 | (2,500,<br>2,600) | 2a     |
|                       | F   | 91,000    | (87,300,<br>94,800)       | 61,300                     | (58,800,<br>63,900)       | 67 | 5,400 | (5,200,<br>5,600)                      | 37,700    | (36,200,<br>39,300)       | 62 | 3,300                                | (3,200,<br>3,500) | 23,600  | (22,600,<br>24,600)   | 38           | 2,100 | (2,000,<br>2,200) | 2a     |
| Cyprus                | B   | 309,300   | (303,000,<br>315,700)     | 181,400                    | (177,700,<br>185,100)     | 59 | 6,500 | (6,400,<br>6,700)                      | 118,400   | (116,000,<br>120,800)     | 65 | 4,200                                | (4,100,<br>4,300) | 63,000  | (61,700,<br>64,300)   | 35           | 2,300 | (2,300,<br>2,400) | 1      |
|                       | M   | 181,000   | (176,100,<br>186,000)     | 109,500                    | (106,500,<br>112,500)     | 60 | 8,000 | (7,800,<br>8,300)                      | 74,100    | (72,100,<br>76,100)       | 68 | 5,400                                | (5,300,<br>5,500) | 35,400  | (34,400,<br>36,300)   | 32           | 2,600 | (2,600,<br>2,700) | 1      |
|                       | F   | 128,300   | (124,400,<br>132,400)     | 71,900                     | (69,700,<br>74,200)       | 56 | 5,200 | (5,000,<br>5,300)                      | 44,300    | (42,900,<br>45,700)       | 62 | 3,200                                | (3,100,<br>3,300) | 27,700  | (26,800,<br>28,500)   | 38           | 2,000 | (2,000,<br>2,100) | 1      |
| Greece                | B   | 52,500    | (49,700,<br>55,500)       | 29,500                     | (27,900,<br>31,200)       | 56 | 4,500 | (4,200,<br>4,700)                      | 18,300    | (17,300,<br>19,300)       | 62 | 2,800                                | (2,600,<br>2,900) | 11,200  | (10,600,<br>11,900)   | 38           | 1,700 | (1,600,<br>1,800) | 1      |
|                       | M   | 31,200    | (29,000,<br>33,600)       | 17,200                     | (16,000,<br>18,500)       | 55 | 5,300 | (4,900,<br>5,700)                      | 11,100    | (10,300,<br>11,900)       | 64 | 3,400                                | (3,200,<br>3,600) | 6,200   | (5,700,<br>6,600)     | 36           | 1,900 | (1,800,<br>2,000) | 1      |
|                       | F   | 21,300    | (19,500,<br>23,200)       | 12,300                     | (11,200,<br>13,400)       | 58 | 3,700 | (3,400,<br>4,000)                      | 7,200     | (6,600,<br>7,900)         | 59 | 2,200                                | (2,000,<br>2,400) | 5,100   | (4,600,<br>5,500)     | 41           | 1,500 | (1,400,<br>1,700) | 1      |
| Italy                 | B   | 646,000   | (637,100,<br>655,100)     | 331,000                    | (326,400,<br>335,600)     | 51 | 5,000 | (4,900,<br>5,000)                      | 220,500   | (217,500,<br>223,600)     | 67 | 3,300                                | (3,200,<br>3,300) | 110,500 | (108,900,<br>112,000) | 33           | 1,700 | (1,700,<br>1,700) | 1      |
|                       | M   | 387,300   | (380,500,<br>394,200)     | 196,300                    | (192,900,<br>199,800)     | 51 | 6,000 | (5,900,<br>6,100)                      | 137,300   | (134,900,<br>139,700)     | 70 | 4,200                                | (4,100,<br>4,300) | 59,000  | (58,000,<br>60,000)   | 30           | 1,900 | (1,800,<br>1,900) | 1      |
|                       | F   | 258,700   | (253,000,<br>264,700)     | 134,700                    | (131,700,<br>137,800)     | 52 | 4,000 | (3,900,<br>4,100)                      | 83,200    | (81,400,<br>85,100)       | 62 | 2,500                                | (2,400,<br>2,500) | 51,500  | (50,300,<br>52,700)   | 38           | 1,600 | (1,500,<br>1,600) | 1      |
| Italy                 | B   | 3,354,000 | (3,335,000,<br>3,373,100) | 1,610,600                  | (1,601,500,<br>1,619,700) | 48 | 4,000 | (4,000,<br>4,000)                      | 1,014,300 | (1,008,600,<br>1,020,100) | 63 | 2,500                                | (2,500,<br>2,500) | 596,300 | (592,900,<br>599,700) | 37           | 1,500 | (1,500,<br>1,500) | 1      |
|                       | M   | 1,866,900 | (1,852,700,<br>1,881,200) | 879,800                    | (873,100,<br>886,600)     | 47 | 4,500 | (4,400,<br>4,500)                      | 571,800   | (567,400,<br>576,200)     | 65 | 2,900                                | (2,800,<br>2,900) | 308,000 | (305,700,<br>310,400) | 35           | 1,600 | (1,600,<br>1,600) | 1      |

| Country         | Sex | Total YLL |                        | Premature cancer mortality |                    |    |       |                | Premature preventable cancer mortality |                    |    |       |                | Premature treatable cancer mortality |                    |    |       |                | Data Quality |
|-----------------|-----|-----------|------------------------|----------------------------|--------------------|----|-------|----------------|----------------------------------------|--------------------|----|-------|----------------|--------------------------------------|--------------------|----|-------|----------------|--------------|
|                 |     | N         | UI                     | N                          | UI                 | %  | ASR   | UI             | N                                      | UI                 | %  | ASR   | UI             | N                                    | UI                 | %  | ASR   | UI             | Method       |
| Malta           | F   | 1,487,100 | (1,474,400, 1,499,900) | 730,800                    | (724,500, 737,100) | 49 | 3,600 | (3,600, 3,700) | 442,500                                | (438,800, 446,300) | 61 | 2,200 | (2,100, 2,200) | 288,200                              | (285,800, 290,700) | 39 | 1,500 | (1,400, 1,500) | 1            |
|                 | B   | 19,500    | (18,000, 21,100)       | 9,800                      | (9,100, 10,700)    | 51 | 3,400 | (3,200, 3,700) | 6,600                                  | (6,100, 7,100)     | 67 | 2,300 | (2,100, 2,500) | 3,300                                | (3,000, 3,600)     | 33 | 1,100 | (1,000, 1,200) | 1            |
|                 | M   | 11,200    | (10,000, 12,400)       | 5,700                      | (5,100, 6,300)     | 51 | 3,900 | (3,500, 4,300) | 3,900                                  | (3,500, 4,400)     | 69 | 2,700 | (2,400, 3,000) | 1,800                                | (1,600, 2,000)     | 31 | 1,200 | (1,100, 1,400) | 1            |
|                 | F   | 8,300     | (7,400, 9,400)         | 4,200                      | (3,700, 4,700)     | 50 | 3,000 | (2,600, 3,300) | 2,700                                  | (2,400, 3,000)     | 64 | 1,900 | (1,700, 2,100) | 1,500                                | (1,300, 1,700)     | 36 | 1,100 | (900, 1,200)   | 1            |
| Montenegro      | B   | 42,900    | (40,300, 45,800)       | 29,300                     | (27,500, 31,200)   | 68 | 7,600 | (7,100, 8,100) | 19,300                                 | (18,100, 20,500)   | 66 | 5,000 | (4,700, 5,300) | 10,000                               | (9,400, 10,700)    | 34 | 2,600 | (2,400, 2,800) | 2a           |
|                 | M   | 24,700    | (22,700, 26,800)       | 16,900                     | (15,500, 18,300)   | 68 | 8,800 | (8,100, 9,600) | 11,300                                 | (10,400, 12,300)   | 67 | 5,800 | (5,400, 6,300) | 5,600                                | (5,200, 6,100)     | 33 | 3,000 | (2,700, 3,200) | 2a           |
|                 | F   | 18,300    | (16,500, 20,200)       | 12,400                     | (11,200, 13,700)   | 68 | 6,400 | (5,800, 7,100) | 8,000                                  | (7,200, 8,800)     | 64 | 4,200 | (3,800, 4,600) | 4,400                                | (4,000, 4,900)     | 36 | 2,300 | (2,000, 2,500) | 2a           |
| North Macedonia | B   | 111,200   | (106,800, 115,700)     | 80,400                     | (77,300, 83,700)   | 72 | 6,300 | (6,100, 6,600) | 52,400                                 | (50,400, 54,500)   | 65 | 4,100 | (4,000, 4,300) | 28,000                               | (26,900, 29,200)   | 35 | 2,200 | (2,100, 2,300) | 1            |
|                 | M   | 67,600    | (64,300, 71,100)       | 49,000                     | (46,600, 51,500)   | 72 | 7,700 | (7,400, 8,100) | 33,400                                 | (31,800, 35,100)   | 68 | 5,300 | (5,000, 5,500) | 15,600                               | (14,800, 16,400)   | 32 | 2,500 | (2,400, 2,600) | 1            |
|                 | F   | 43,500    | (40,800, 46,400)       | 31,500                     | (29,500, 33,600)   | 72 | 5,000 | (4,700, 5,300) | 19,000                                 | (17,800, 20,300)   | 60 | 3,000 | (2,800, 3,200) | 12,500                               | (11,700, 13,300)   | 40 | 2,000 | (1,900, 2,100) | 1            |
| Portugal        | B   | 624,600   | (615,900, 633,400)     | 347,800                    | (342,900, 352,700) | 56 | 5,300 | (5,200, 5,400) | 225,900                                | (222,800, 229,100) | 65 | 3,400 | (3,400, 3,500) | 121,800                              | (120,100, 123,600) | 35 | 1,900 | (1,900, 1,900) | 1            |
|                 | M   | 386,700   | (379,900, 393,700)     | 221,300                    | (217,400, 225,300) | 57 | 7,000 | (6,900, 7,200) | 148,900                                | (146,300, 151,600) | 67 | 4,700 | (4,600, 4,800) | 72,400                               | (71,100, 73,700)   | 33 | 2,300 | (2,300, 2,400) | 1            |
|                 | F   | 237,900   | (232,500, 243,300)     | 126,400                    | (123,600, 129,300) | 53 | 3,700 | (3,700, 3,800) | 77,000                                 | (75,200, 78,700)   | 61 | 2,300 | (2,200, 2,300) | 49,400                               | (48,300, 50,600)   | 39 | 1,500 | (1,400, 1,500) | 1            |
| Serbia          | B   | 693,200   | (683,000, 703,400)     | 467,400                    | (460,600, 474,300) | 67 | 8,400 | (8,300, 8,500) | 310,100                                | (305,500, 314,700) | 66 | 5,500 | (5,500, 5,600) | 157,400                              | (155,100, 159,700) | 34 | 2,900 | (2,800, 2,900) | 1            |
|                 | M   | 388,800   | (381,400, 396,400)     | 260,800                    | (255,800, 265,800) | 67 | 9,600 | (9,500, 9,800) | 176,100                                | (172,800, 179,500) | 68 | 6,400 | (6,300, 6,600) | 84,600                               | (83,000, 86,300)   | 32 | 3,200 | (3,100, 3,300) | 1            |
|                 | F   | 304,300   | (297,600, 311,300)     | 206,700                    | (202,100, 211,400) | 68 | 7,400 | (7,200, 7,500) | 133,900                                | (131,000, 137,000) | 65 | 4,800 | (4,600, 4,900) | 72,700                               | (71,100, 74,400)   | 35 | 2,600 | (2,600, 2,700) | 1            |

| Country        | Sex | Total YLL |                        | Premature cancer mortality |                        |    |       |                | Premature preventable cancer mortality |                        |    |       |                | Premature treatable cancer mortality |                    |    |       |                | Data Quality |
|----------------|-----|-----------|------------------------|----------------------------|------------------------|----|-------|----------------|----------------------------------------|------------------------|----|-------|----------------|--------------------------------------|--------------------|----|-------|----------------|--------------|
|                |     | N         | UI                     | N                          | UI                     | %  | ASR   | UI             | N                                      | UI                     | %  | ASR   | UI             | N                                    | UI                 | %  | ASR   | UI             | Method       |
| Slovenia       | B   | 135,300   | (131,300, 139,400)     | 76,600                     | (74,400, 79,000)       | 57 | 5,300 | (5,200, 5,500) | 50,100                                 | (48,600, 51,600)       | 65 | 3,500 | (3,400, 3,600) | 26,600                               | (25,800, 27,400)   | 35 | 1,900 | (1,800, 1,900) | 1            |
|                | M   | 79,100    | (76,000, 82,400)       | 46,200                     | (44,300, 48,000)       | 58 | 6,300 | (6,100, 6,600) | 30,400                                 | (29,200, 31,600)       | 66 | 4,100 | (4,000, 4,300) | 15,800                               | (15,200, 16,400)   | 34 | 2,200 | (2,100, 2,300) | 1            |
|                | F   | 56,100    | (53,600, 58,800)       | 30,500                     | (29,100, 31,900)       | 54 | 4,400 | (4,200, 4,600) | 19,700                                 | (18,800, 20,600)       | 65 | 2,800 | (2,700, 2,900) | 10,800                               | (10,300, 11,300)   | 35 | 1,600 | (1,500, 1,600) | 1            |
| Spain          | B   | 2,324,100 | (2,307,700, 2,340,500) | 1,295,200                  | (1,286,100, 1,304,400) | 56 | 4,300 | (4,300, 4,400) | 865,800                                | (859,700, 871,900)     | 67 | 2,900 | (2,900, 2,900) | 429,400                              | (426,400, 432,500) | 33 | 1,500 | (1,400, 1,500) | 1            |
|                | M   | 1,404,000 | (1,391,200, 1,416,800) | 782,500                    | (775,400, 789,700)     | 56 | 5,300 | (5,200, 5,300) | 543,700                                | (538,700, 548,600)     | 69 | 3,600 | (3,600, 3,700) | 238,800                              | (236,700, 241,000) | 31 | 1,600 | (1,600, 1,600) | 1            |
|                | F   | 920,100   | (909,700, 930,500)     | 512,700                    | (507,000, 518,600)     | 56 | 3,400 | (3,400, 3,500) | 322,100                                | (318,500, 325,800)     | 63 | 2,200 | (2,100, 2,200) | 190,600                              | (188,500, 192,800) | 37 | 1,300 | (1,300, 1,300) | 1            |
| Western Europe |     |           |                        |                            |                        |    |       |                |                                        |                        |    |       |                |                                      |                    |    |       |                |              |
| Austria        | B   | 463,200   | (455,700, 470,800)     | 251,600                    | (247,600, 255,800)     | 54 | 4,400 | (4,300, 4,500) | 162,800                                | (160,200, 165,500)     | 65 | 2,800 | (2,800, 2,800) | 88,800                               | (87,400, 90,300)   | 35 | 1,600 | (1,600, 1,600) | 1            |
|                | M   | 256,500   | (250,900, 262,200)     | 140,800                    | (137,800, 144,000)     | 55 | 4,900 | (4,800, 5,100) | 91,400                                 | (89,400, 93,500)       | 65 | 3,200 | (3,100, 3,200) | 49,400                               | (48,300, 50,500)   | 35 | 1,800 | (1,700, 1,800) | 1            |
|                | F   | 206,700   | (201,700, 211,900)     | 110,800                    | (108,100, 113,500)     | 54 | 3,900 | (3,800, 4,000) | 71,400                                 | (69,600, 73,100)       | 64 | 2,500 | (2,400, 2,500) | 39,400                               | (38,500, 40,400)   | 36 | 1,400 | (1,400, 1,400) | 1            |
| Belgium        | B   | 613,300   | (604,300, 622,400)     | 334,400                    | (329,500, 339,300)     | 55 | 4,700 | (4,600, 4,700) | 223,400                                | (220,200, 226,700)     | 67 | 3,100 | (3,000, 3,100) | 111,000                              | (109,400, 112,600) | 33 | 1,600 | (1,600, 1,600) | 1            |
|                | M   | 345,300   | (338,700, 352,100)     | 189,500                    | (185,900, 193,200)     | 55 | 5,200 | (5,100, 5,300) | 128,300                                | (125,800, 130,800)     | 68 | 3,500 | (3,400, 3,600) | 61,200                               | (60,000, 62,400)   | 32 | 1,700 | (1,700, 1,700) | 1            |
|                | F   | 268,000   | (262,100, 274,000)     | 144,900                    | (141,700, 148,100)     | 54 | 4,100 | (4,000, 4,200) | 95,100                                 | (93,000, 97,200)       | 66 | 2,700 | (2,600, 2,700) | 49,800                               | (48,700, 50,900)   | 34 | 1,400 | (1,400, 1,500) | 1            |
| France         | B   | 3,779,100 | (3,757,600, 3,800,700) | 2,068,100                  | (2,056,300, 2,079,900) | 55 | 5,300 | (5,300, 5,300) | 1,395,700                              | (1,387,800, 1,403,700) | 67 | 3,600 | (3,500, 3,600) | 672,300                              | (668,500, 676,200) | 33 | 1,800 | (1,700, 1,800) | 1            |
|                | M   | 2,206,800 | (2,190,200, 2,223,500) | 1,240,200                  | (1,230,900, 1,249,600) | 56 | 6,500 | (6,400, 6,500) | 859,400                                | (853,000, 865,900)     | 69 | 4,500 | (4,400, 4,500) | 380,800                              | (377,900, 383,700) | 31 | 2,000 | (2,000, 2,000) | 1            |
|                | F   | 1,572,300 | (1,558,600, 1,586,200) | 827,900                    | (820,600, 835,200)     | 53 | 4,200 | (4,200, 4,300) | 536,300                                | (531,600, 541,100)     | 65 | 2,700 | (2,700, 2,700) | 291,500                              | (289,000, 294,100) | 35 | 1,500 | (1,500, 1,500) | 1            |

| Country                 | Sex | Total YLL |                        | Premature cancer mortality |                        |    |       | Premature preventable cancer mortality |           |                        |    | Premature treatable cancer mortality |                |         |                    | Data Quality |       |                |        |
|-------------------------|-----|-----------|------------------------|----------------------------|------------------------|----|-------|----------------------------------------|-----------|------------------------|----|--------------------------------------|----------------|---------|--------------------|--------------|-------|----------------|--------|
|                         |     | N         | UI                     | N                          | UI                     | %  | ASR   | UI                                     | N         | UI                     | %  | ASR                                  | UI             | N       | UI                 | %            | ASR   | UI             | Method |
| Germany                 | B   | 5,021,200 | (4,997,000, 5,045,600) | 2,654,300                  | (2,641,500, 2,667,200) | 53 | 4,700 | (4,700, 4,700)                         | 1,740,400 | (1,732,000, 1,748,800) | 66 | 3,000                                | (3,000, 3,100) | 914,000 | (909,600, 918,400) | 34           | 1,700 | (1,700, 1,700) | 1      |
|                         | M   | 2,801,700 | (2,783,500, 2,820,100) | 1,500,400                  | (1,490,600, 1,510,200) | 54 | 5,300 | (5,300, 5,400)                         | 995,800   | (989,300, 1,002,400)   | 66 | 3,500                                | (3,500, 3,500) | 504,500 | (501,200, 507,800) | 34           | 1,800 | (1,800, 1,900) | 1      |
|                         | F   | 2,219,500 | (2,203,500, 2,235,700) | 1,154,000                  | (1,145,600, 1,162,400) | 52 | 4,100 | (4,100, 4,200)                         | 744,500   | (739,100, 749,900)     | 65 | 2,600                                | (2,600, 2,600) | 409,500 | (406,500, 412,400) | 35           | 1,500 | (1,500, 1,500) | 1      |
| Luxembourg              | B   | 23,700    | (21,900, 25,600)       | 13,300                     | (12,400, 14,400)       | 56 | 3,600 | (3,400, 3,900)                         | 9,100     | (8,400, 9,800)         | 68 | 2,500                                | (2,300, 2,700) | 4,300   | (4,000, 4,600)     | 32           | 1,200 | (1,100, 1,300) | 1      |
|                         | M   | 13,900    | (12,500, 15,400)       | 7,900                      | (7,200, 8,800)         | 57 | 4,200 | (3,800, 4,600)                         | 5,600     | (5,100, 6,200)         | 71 | 3,000                                | (2,700, 3,300) | 2,300   | (2,100, 2,600)     | 29           | 1,200 | (1,100, 1,400) | 1      |
|                         | F   | 9,800     | (8,700, 11,000)        | 5,400                      | (4,800, 6,100)         | 55 | 3,000 | (2,700, 3,400)                         | 3,500     | (3,100, 3,900)         | 64 | 1,900                                | (1,700, 2,200) | 1,900   | (1,700, 2,200)     | 36           | 1,100 | (1,000, 1,200) | 1      |
| Switzerland             | B   | 381,500   | (374,600, 388,400)     | 196,900                    | (193,400, 200,500)     | 52 | 3,600 | (3,600, 3,700)                         | 124,400   | (122,200, 126,700)     | 63 | 2,300                                | (2,200, 2,300) | 72,500  | (71,200, 73,900)   | 37           | 1,400 | (1,300, 1,400) | 1      |
|                         | M   | 210,400   | (205,400, 215,600)     | 107,500                    | (104,900, 110,100)     | 51 | 3,900 | (3,800, 4,000)                         | 68,700    | (67,000, 70,300)       | 64 | 2,500                                | (2,400, 2,500) | 38,800  | (37,900, 39,800)   | 36           | 1,400 | (1,400, 1,500) | 1      |
|                         | F   | 171,000   | (166,500, 175,700)     | 89,500                     | (87,100, 91,900)       | 52 | 3,300 | (3,200, 3,400)                         | 55,700    | (54,200, 57,200)       | 62 | 2,100                                | (2,000, 2,100) | 33,700  | (32,800, 34,700)   | 38           | 1,300 | (1,200, 1,300) | 1      |
| The Netherlands         | B   | 1,000,200 | (989,100, 1,011,500)   | 519,200                    | (513,400, 525,100)     | 52 | 4,700 | (4,600, 4,700)                         | 343,200   | (339,400, 347,000)     | 66 | 3,100                                | (3,000, 3,100) | 176,000 | (174,100, 178,000) | 34           | 1,600 | (1,600, 1,600) | 1      |
|                         | M   | 539,500   | (531,500, 547,700)     | 266,500                    | (262,500, 270,500)     | 49 | 4,700 | (4,600, 4,800)                         | 175,200   | (172,600, 177,900)     | 66 | 3,100                                | (3,000, 3,100) | 91,300  | (89,900, 92,700)   | 34           | 1,600 | (1,600, 1,700) | 1      |
|                         | F   | 460,700   | (453,000, 468,600)     | 252,700                    | (248,500, 257,000)     | 55 | 4,600 | (4,600, 4,700)                         | 168,000   | (165,200, 170,800)     | 66 | 3,000                                | (3,000, 3,100) | 84,700  | (83,300, 86,200)   | 34           | 1,600 | (1,600, 1,600) | 1      |
| Australia & New Zealand |     |           |                        |                            |                        |    |       |                                        |           |                        |    |                                      |                |         |                    |              |       |                |        |
| Australia               | B   | 962,300   | (951,800, 973,000)     | 496,500                    | (491,100, 502,000)     | 52 | 3,500 | (3,500, 3,600)                         | 303,400   | (300,100, 306,800)     | 61 | 2,100                                | (2,100, 2,200) | 193,100 | (191,000, 195,300) | 39           | 1,400 | (1,400, 1,400) | 1      |
|                         | M   | 538,200   | (530,500, 546,000)     | 270,000                    | (266,200, 273,900)     | 50 | 3,900 | (3,800, 3,900)                         | 165,400   | (163,100, 167,800)     | 61 | 2,400                                | (2,300, 2,400) | 104,600 | (103,100, 106,100) | 39           | 1,500 | (1,500, 1,500) | 1      |
|                         | F   | 424,100   | (417,000, 431,300)     | 226,500                    | (222,800, 230,400)     | 53 | 3,200 | (3,200, 3,300)                         | 138,000   | (135,600, 140,300)     | 61 | 1,900                                | (1,900, 2,000) | 88,600  | (87,100, 90,100)   | 39           | 1,300 | (1,300, 1,300) | 1      |



| Country               | Sex | Total YLL |                    | Premature cancer mortality |                    |    |       |                | Premature preventable cancer mortality |                  |    |       |                | Premature treatable cancer mortality |                  |    |       |                | Data Quality |
|-----------------------|-----|-----------|--------------------|----------------------------|--------------------|----|-------|----------------|----------------------------------------|------------------|----|-------|----------------|--------------------------------------|------------------|----|-------|----------------|--------------|
|                       |     | N         | UI                 | N                          | UI                 | %  | ASR   | UI             | N                                      | UI               | %  | ASR   | UI             | N                                    | UI               | %  | ASR   | UI             | Method       |
| New Zealand           | B   | 220,900   | (215,600, 226,300) | 119,600                    | (116,800, 122,600) | 54 | 4,400 | (4,300, 4,500) | 71,000                                 | (69,300, 72,800) | 59 | 2,600 | (2,500, 2,700) | 48,600                               | (47,400, 49,800) | 41 | 1,800 | (1,800, 1,900) | 1            |
|                       | M   | 114,200   | (110,500, 118,000) | 57,900                     | (56,000, 59,900)   | 51 | 4,400 | (4,200, 4,500) | 33,300                                 | (32,200, 34,400) | 58 | 2,500 | (2,400, 2,600) | 24,600                               | (23,800, 25,400) | 42 | 1,900 | (1,800, 1,900) | 1            |
|                       | F   | 106,700   | (103,000, 110,600) | 61,700                     | (59,600, 63,900)   | 58 | 4,500 | (4,300, 4,600) | 37,700                                 | (36,400, 39,100) | 61 | 2,700 | (2,600, 2,800) | 24,000                               | (23,200, 24,900) | 39 | 1,800 | (1,700, 1,800) | 1            |
| Oceania excl. Aust/NZ |     |           |                    |                            |                    |    |       |                |                                        |                  |    |       |                |                                      |                  |    |       |                |              |
| Fiji                  | B   | 27,600    | (24,900, 30,500)   | 21,700                     | (19,700, 24,100)   | 79 | 5,800 | (5,300, 6,500) | 13,200                                 | (11,900, 14,600) | 61 | 3,600 | (3,200, 3,900) | 8,600                                | (7,700, 9,500)   | 39 | 2,300 | (2,100, 2,500) | 2a           |
|                       | M   | 10,100    | (8,500, 11,900)    | 7,100                      | (6,000, 8,400)     | 71 | 3,900 | (3,300, 4,600) | 4,200                                  | (3,600, 5,000)   | 59 | 2,300 | (2,000, 2,800) | 2,900                                | (2,500, 3,400)   | 41 | 1,600 | (1,300, 1,900) | 2a           |
|                       | F   | 17,500    | (15,400, 19,900)   | 14,600                     | (12,900, 16,600)   | 83 | 7,800 | (6,900, 8,900) | 8,900                                  | (7,900, 10,100)  | 61 | 4,800 | (4,200, 5,400) | 5,700                                | (5,000, 6,400)   | 39 | 3,000 | (2,700, 3,400) | 2a           |
| France, New Caledonia | B   | 11,500    | (10,100, 13,100)   | 7,700                      | (6,800, 8,800)     | 67 | 5,500 | (4,900, 6,300) | 5,000                                  | (4,400, 5,700)   | 65 | 3,600 | (3,200, 4,100) | 2,700                                | (2,400, 3,100)   | 35 | 1,900 | (1,700, 2,200) | 2a           |
|                       | M   | 6,600     | (5,600, 7,800)     | 4,300                      | (3,700, 5,100)     | 66 | 6,400 | (5,400, 7,500) | 3,000                                  | (2,500, 3,600)   | 69 | 4,400 | (3,700, 5,200) | 1,300                                | (1,100, 1,600)   | 31 | 2,000 | (1,700, 2,300) | 2a           |
|                       | F   | 4,900     | (4,000, 6,000)     | 3,400                      | (2,800, 4,100)     | 69 | 4,800 | (3,900, 5,800) | 2,000                                  | (1,700, 2,500)   | 60 | 2,900 | (2,400, 3,500) | 1,300                                | (1,100, 1,600)   | 40 | 1,900 | (1,500, 2,300) | 2a           |
| French Polynesia      | B   | 13,000    | (11,000, 15,500)   | 9,500                      | (8,000, 11,300)    | 73 | 6,700 | (5,600, 7,900) | 5,900                                  | (5,000, 7,000)   | 62 | 4,200 | (3,500, 4,900) | 3,600                                | (3,000, 4,300)   | 38 | 2,500 | (2,100, 3,000) | 2a           |
|                       | M   | 7,300     | (5,800, 9,200)     | 5,300                      | (4,200, 6,700)     | 72 | 7,300 | (5,800, 9,200) | 3,500                                  | (2,800, 4,400)   | 66 | 4,800 | (3,800, 6,000) | 1,800                                | (1,400, 2,300)   | 34 | 2,500 | (2,000, 3,200) | 2a           |
|                       | F   | 5,700     | (4,400, 7,400)     | 4,200                      | (3,200, 5,500)     | 74 | 6,000 | (4,600, 7,800) | 2,400                                  | (1,900, 3,100)   | 57 | 3,500 | (2,700, 4,500) | 1,800                                | (1,400, 2,300)   | 43 | 2,500 | (1,900, 3,300) | 2a           |
| Guam                  | B   | 6,900     | (5,900, 8,000)     | 4,800                      | (4,200, 5,600)     | 70 | 5,800 | (5,000, 6,700) | 3,500                                  | (3,000, 4,100)   | 73 | 4,200 | (3,600, 4,900) | 1,300                                | (1,100, 1,500)   | 27 | 1,600 | (1,400, 1,800) | 2a           |
|                       | M   | 4,000     | (3,300, 4,800)     | 2,800                      | (2,300, 3,400)     | 70 | 6,600 | (5,400, 8,100) | 2,100                                  | (1,700, 2,600)   | 76 | 5,000 | (4,100, 6,100) | 700                                  | (600, 800)       | 24 | 1,600 | (1,300, 2,000) | 2a           |
|                       | F   | 2,900     | (2,300, 3,700)     | 2,000                      | (1,600, 2,600)     | 70 | 4,900 | (3,900, 6,200) | 1,400                                  | (1,100, 1,800)   | 69 | 3,400 | (2,700, 4,200) | 600                                  | (500, 800)       | 31 | 1,500 | (1,200, 1,900) | 2a           |

| Country          | Sex | Total YLL |                    | Premature cancer mortality |                    |    |       |                 | Premature preventable cancer mortality |                   |    |       |                | Premature treatable cancer mortality |                   |    |       |                | Data Quality |
|------------------|-----|-----------|--------------------|----------------------------|--------------------|----|-------|-----------------|----------------------------------------|-------------------|----|-------|----------------|--------------------------------------|-------------------|----|-------|----------------|--------------|
|                  |     | N         | UI                 | N                          | UI                 | %  | ASR   | UI              | N                                      | UI                | %  | ASR   | UI             | N                                    | UI                | %  | ASR   | UI             | Method       |
| Papua New Guinea | B   | 246,200   | (167,100, 362,800) | 190,000                    | (128,900, 280,000) | 77 | 7,000 | (4,800, 10,300) | 118,500                                | (80,400, 174,600) | 62 | 4,400 | (3,000, 6,400) | 71,500                               | (48,500, 105,400) | 38 | 2,700 | (1,800, 3,900) | 3            |
|                  | M   | 108,800   | (59,500, 199,000)  | 78,400                     | (42,900, 143,300)  | 72 | 6,200 | (3,400, 11,400) | 47,500                                 | (26,000, 86,900)  | 61 | 3,800 | (2,100, 6,900) | 30,900                               | (16,900, 56,400)  | 39 | 2,500 | (1,300, 4,500) | 3            |
|                  | F   | 137,300   | (82,800, 227,800)  | 111,600                    | (67,300, 185,200)  | 81 | 7,900 | (4,700, 13,000) | 70,900                                 | (42,800, 117,700) | 64 | 5,000 | (3,000, 8,300) | 40,700                               | (24,500, 67,500)  | 36 | 2,900 | (1,700, 4,800) | 3            |
| Samoa            | B   | 6,100     | (4,100, 9,100)     | 4,100                      | (2,700, 6,100)     | 67 | 6,400 | (4,300, 9,500)  | 2,300                                  | (1,500, 3,500)    | 57 | 3,600 | (2,400, 5,400) | 1,800                                | (1,200, 2,700)    | 43 | 2,800 | (1,800, 4,100) | 9            |
|                  | M   | 3,000     | (1,700, 5,200)     | 1,800                      | (1,100, 3,200)     | 62 | 5,700 | (3,300, 9,900)  | 1,100                                  | (600, 1,900)      | 60 | 3,500 | (2,000, 6,000) | 700                                  | (400, 1,300)      | 40 | 2,200 | (1,300, 3,900) | 9            |
|                  | F   | 3,100     | (1,700, 5,600)     | 2,300                      | (1,300, 4,100)     | 73 | 7,200 | (4,000, 12,900) | 1,200                                  | (700, 2,200)      | 54 | 3,800 | (2,100, 6,900) | 1,000                                | (600, 1,900)      | 46 | 3,300 | (1,800, 6,000) | 9            |
| Solomon Islands  | B   | 12,000    | (7,900, 18,300)    | 8,600                      | (5,700, 13,100)    | 72 | 4,600 | (3,000, 7,000)  | 5,500                                  | (3,600, 8,300)    | 63 | 2,900 | (1,900, 4,400) | 3,200                                | (2,100, 4,800)    | 37 | 1,700 | (1,100, 2,500) | 3            |
|                  | M   | 5,400     | (2,800, 10,400)    | 3,600                      | (1,900, 7,000)     | 67 | 4,100 | (2,100, 7,900)  | 2,100                                  | (1,100, 4,100)    | 59 | 2,400 | (1,300, 4,700) | 1,500                                | (800, 2,900)      | 41 | 1,700 | (900, 3,200)   | 3            |
|                  | F   | 6,600     | (3,800, 11,500)    | 5,000                      | (2,900, 8,600)     | 75 | 5,000 | (2,900, 8,700)  | 3,300                                  | (1,900, 5,800)    | 67 | 3,400 | (2,000, 5,800) | 1,700                                | (1,000, 2,900)    | 33 | 1,700 | (1,000, 2,900) | 3            |
| Vanuatu          | B   | 6,100     | (4,000, 9,400)     | 4,400                      | (2,900, 6,800)     | 72 | 4,700 | (3,100, 7,300)  | 2,900                                  | (1,900, 4,500)    | 66 | 3,200 | (2,100, 4,900) | 1,500                                | (1,000, 2,300)    | 34 | 1,500 | (1,000, 2,400) | 3            |
|                  | M   | 3,000     | (1,600, 5,900)     | 2,000                      | (1,000, 3,900)     | 66 | 4,500 | (2,300, 8,700)  | 1,300                                  | (700, 2,500)      | 64 | 3,000 | (1,500, 5,900) | 700                                  | (400, 1,400)      | 36 | 1,500 | (800, 2,900)   | 3            |
|                  | F   | 3,100     | (1,800, 5,500)     | 2,400                      | (1,400, 4,200)     | 78 | 4,900 | (2,800, 8,700)  | 1,600                                  | (900, 2,900)      | 68 | 3,300 | (1,900, 5,900) | 800                                  | (400, 1,300)      | 32 | 1,600 | (900, 2,800)   | 3            |

B: both sexes, M: males, F: females, UI: Uncertainty Interval, Method: 1 = National rates projected to 2020, 2a = Most recent rates from one source applied to 2020 population, 2b = Weighted/simple average of the most recent local rates applied to 2020 population, 3 = Estimated from national incidence estimates by modelling, using incidence:mortality ratios derived from cancer registry data in neighbouring countries, 9 = No data: the rates are those of neighbouring countries in the same area

Appendix Figure 1: Premature preventable years of life lost (YLL) from cancer (ages 30-69) in (a) both sexes, (b) males, and (c) females, 2020

(a) Both sexes

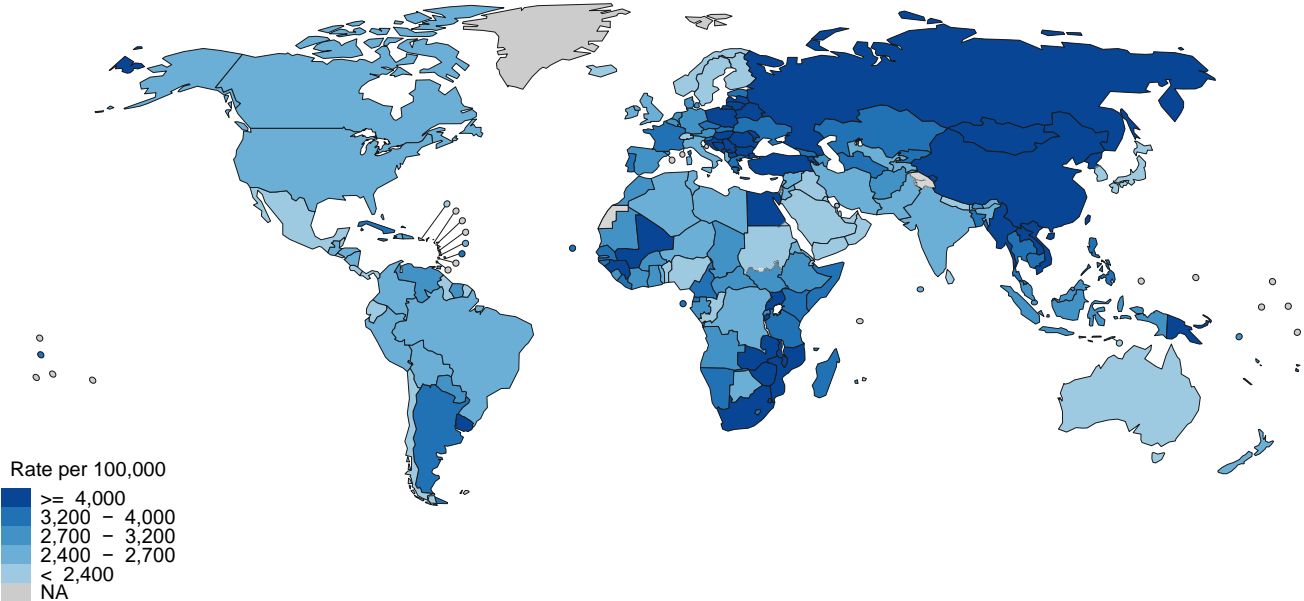

**(b) Males**

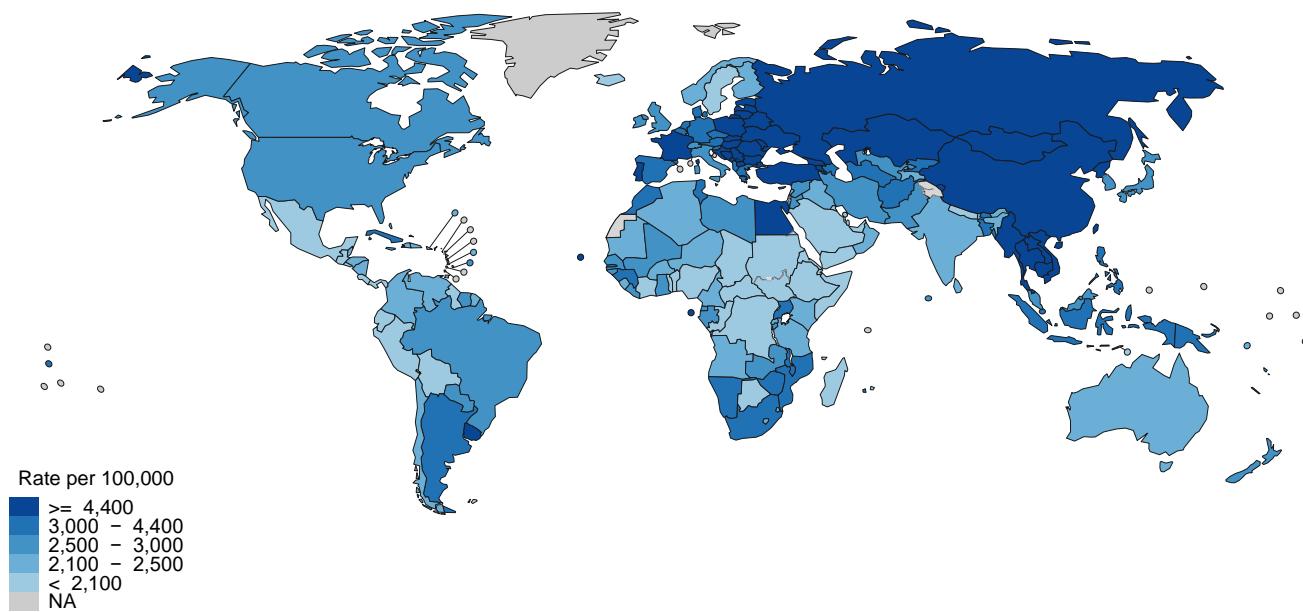

(c) Females

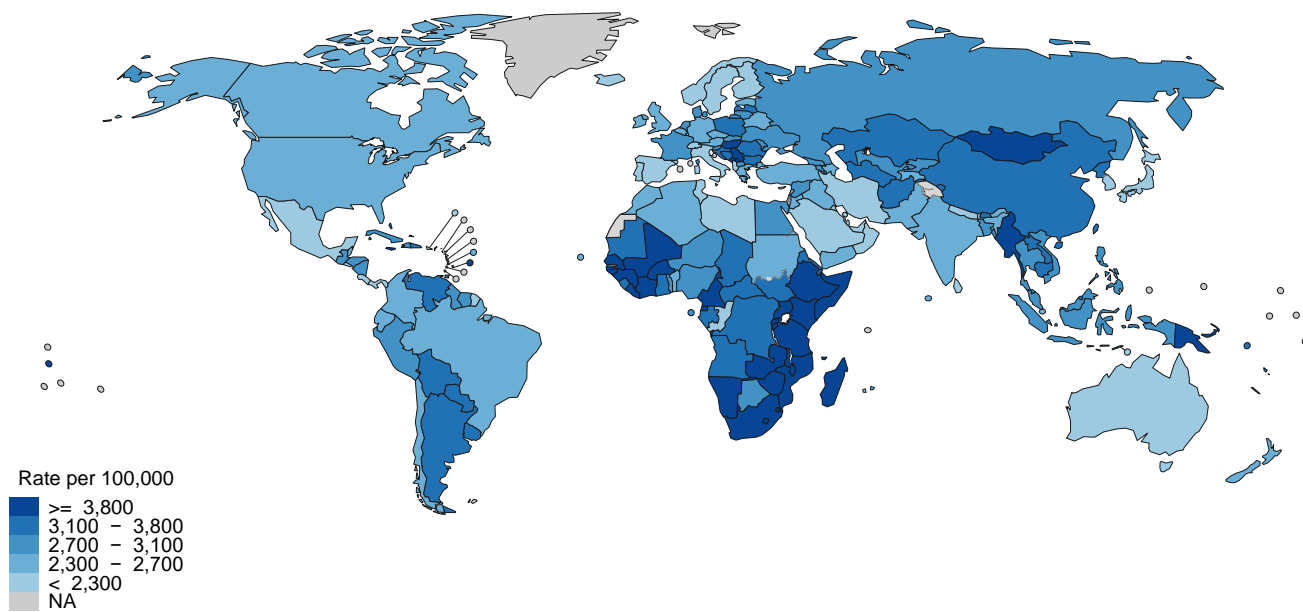

Appendix Figure 2: Premature treatable years of life lost (YLL) from cancer (ages 30-69) in (a) both sexes, (b) males, and (c) females, 2020

(a) Both sexes

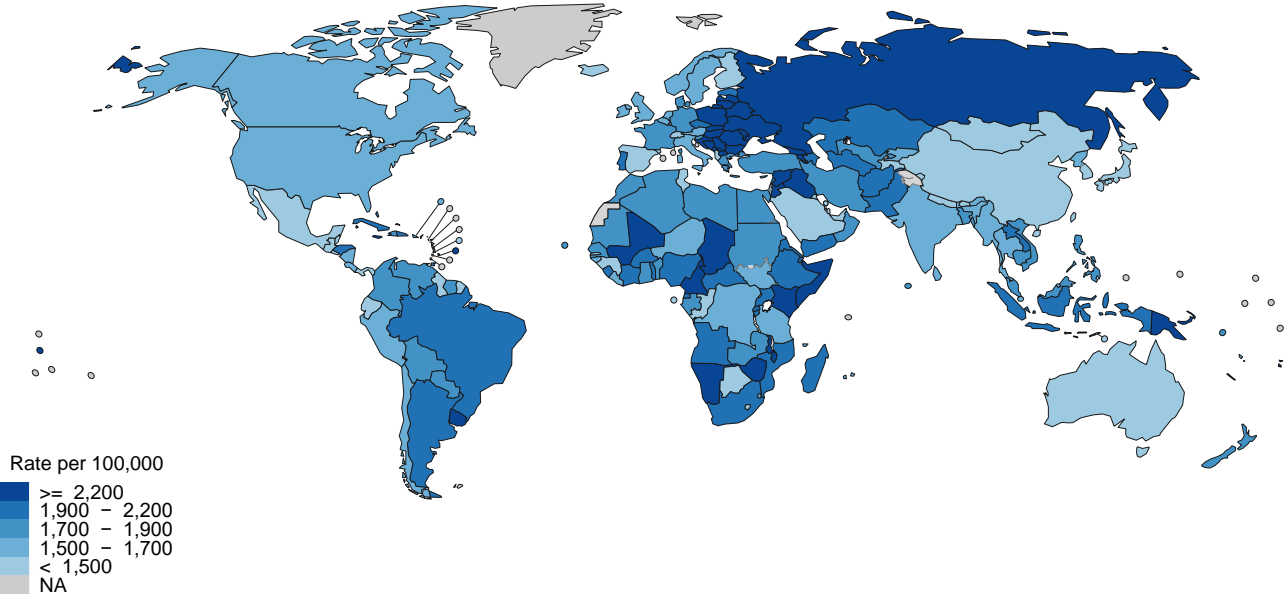

**(b) Males**

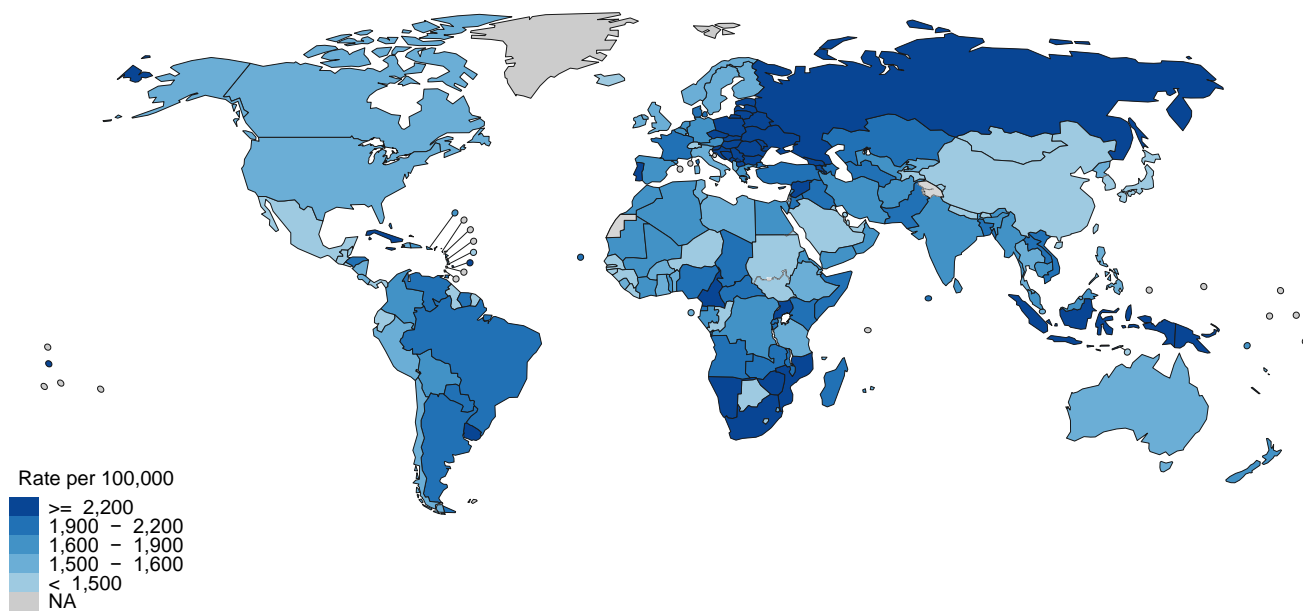

(c) Females

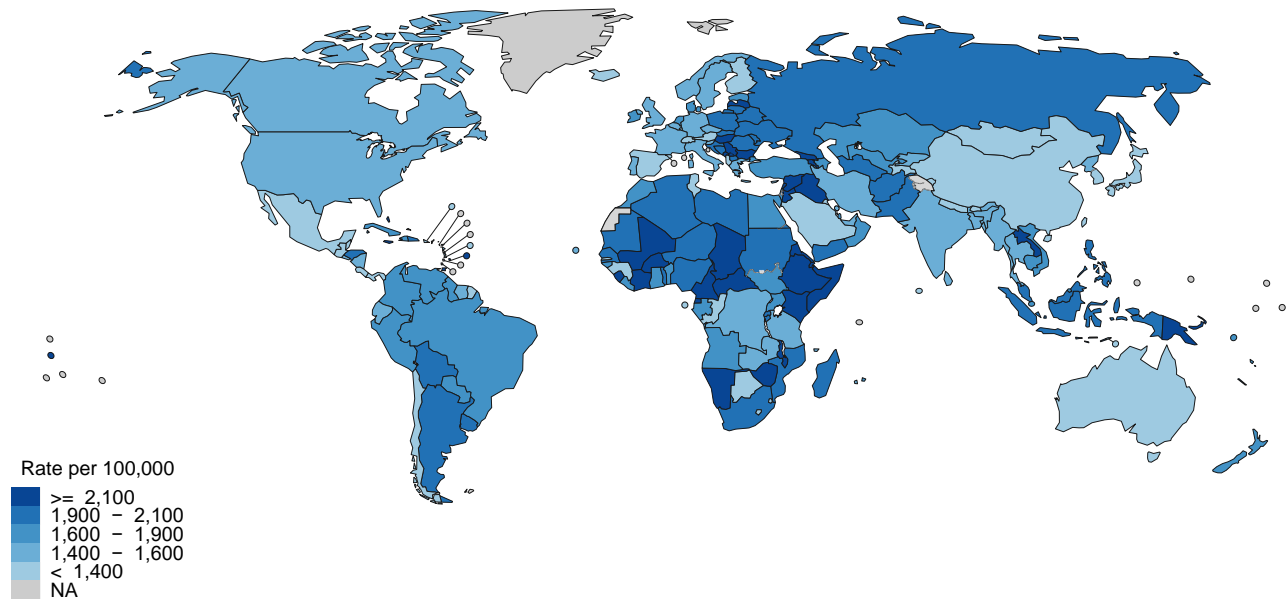



Appendix Figure 3: Premature preventable proportion of total years of life lost (YLL) from cancer (ages 30-69) in (a) both sexes, (b) males, and (c) females, 2020  
(a) Both sexes

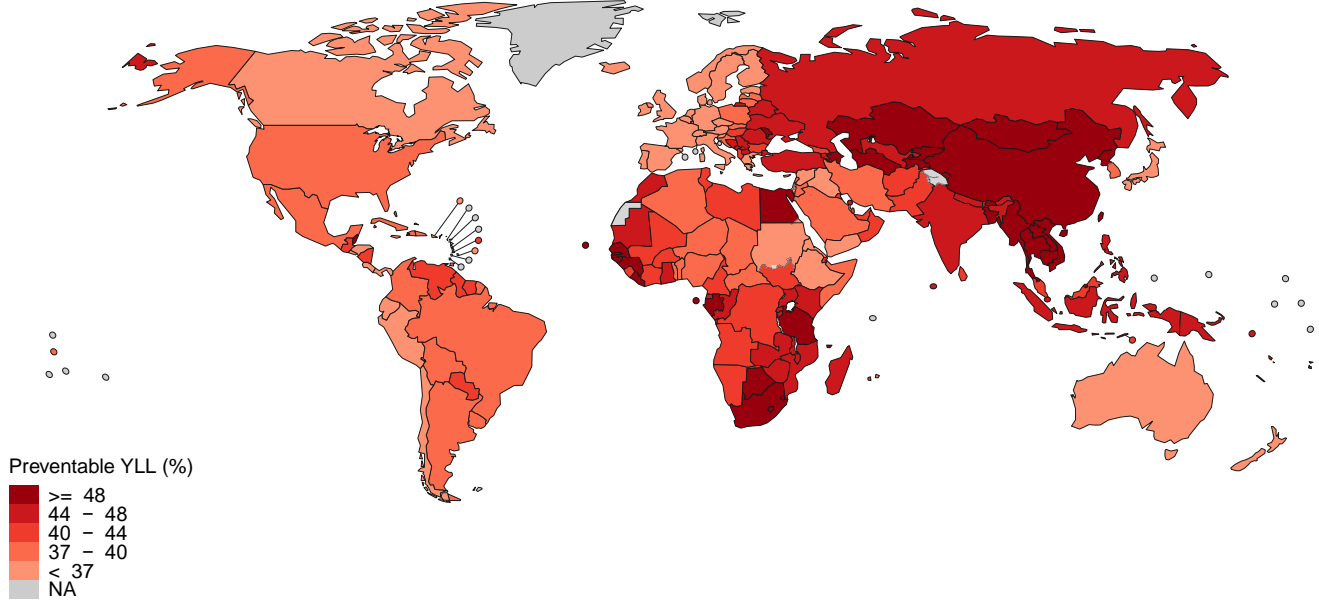

(b) Males

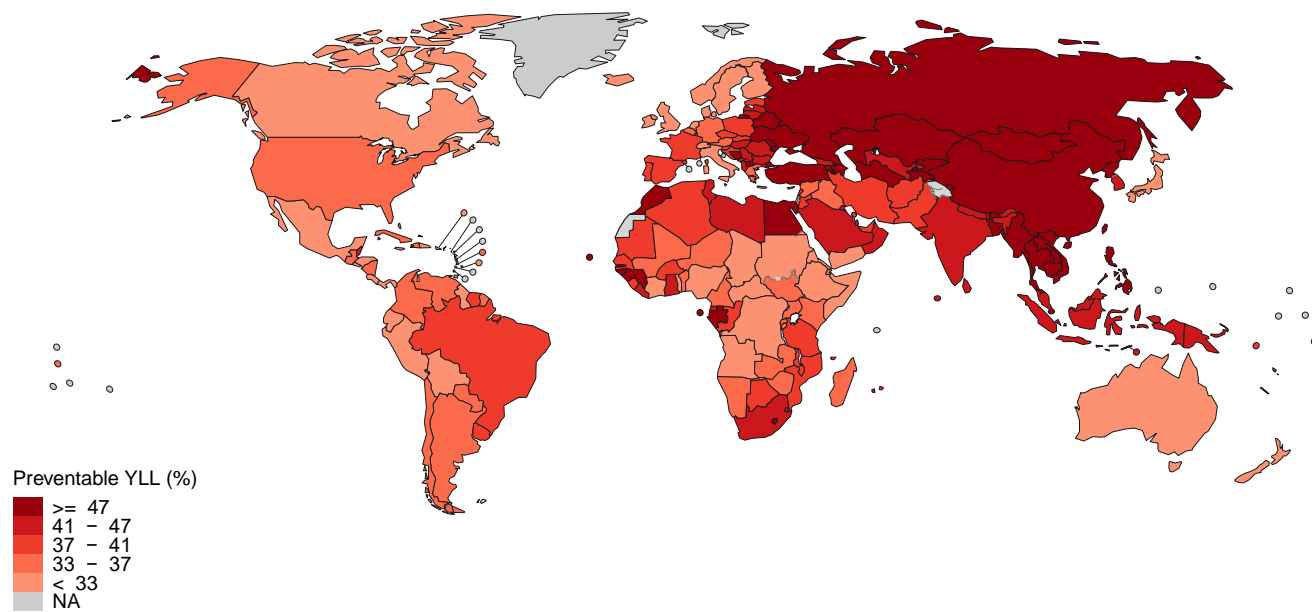

(c) Females

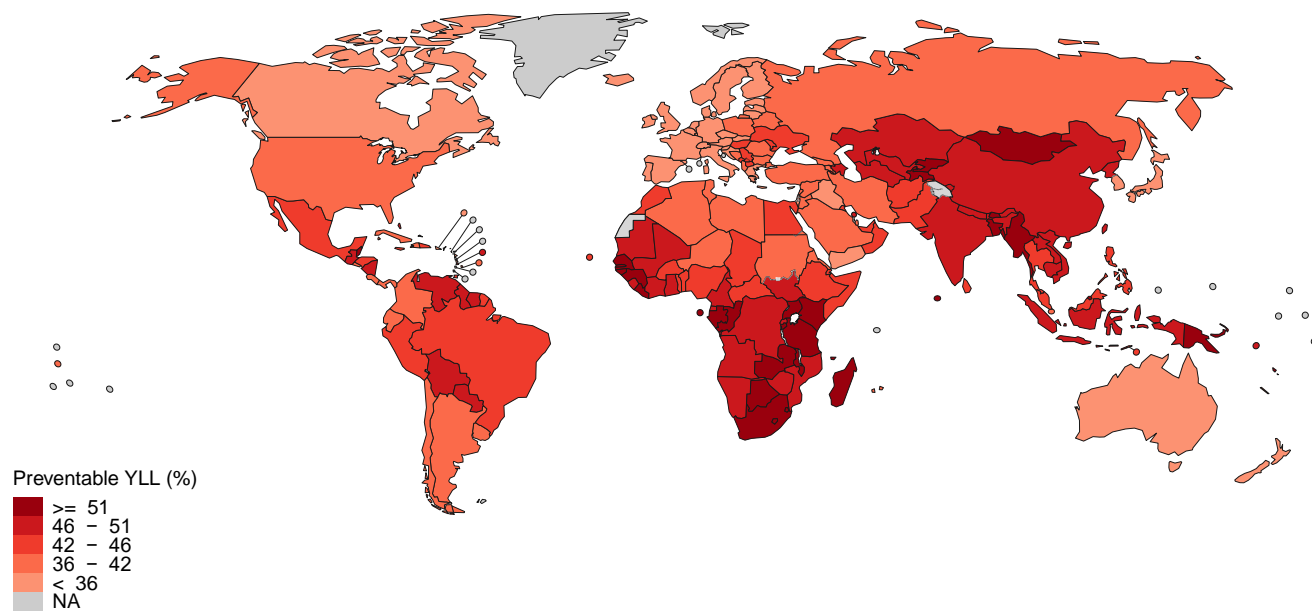

Appendix Figure 4: Premature treatable proportion of total years of life lost from cancer (ages 30-69) in (a) both sexes, (b) males, and (c) females, 2020

(a) Both sexes

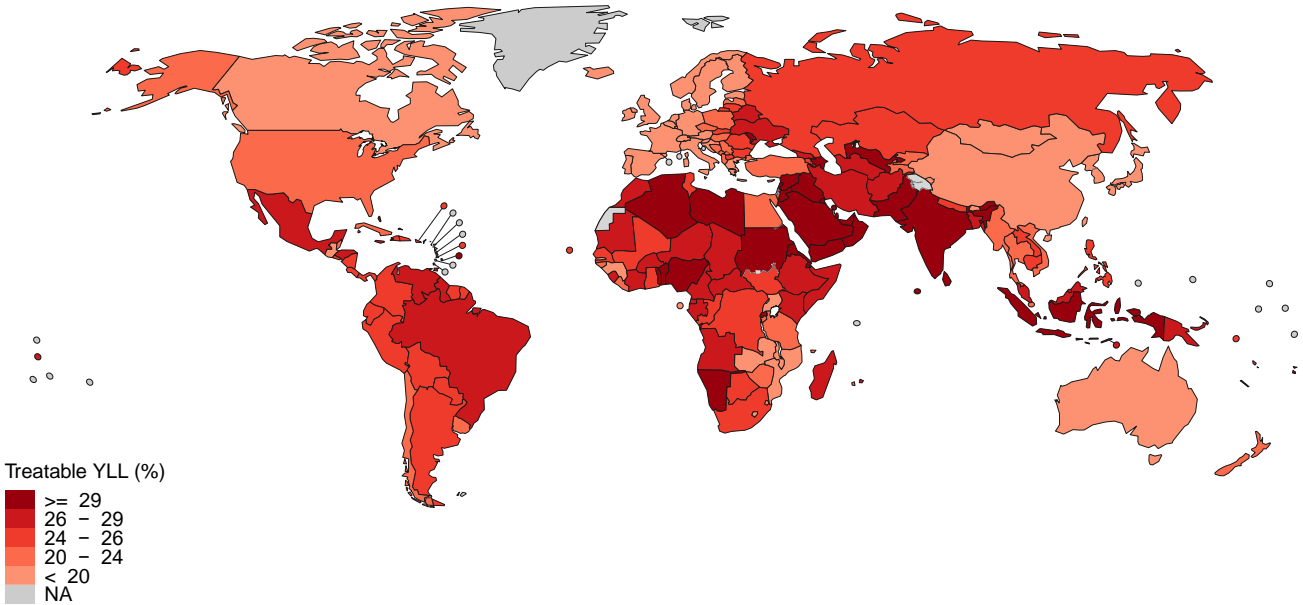

**(b) Males**

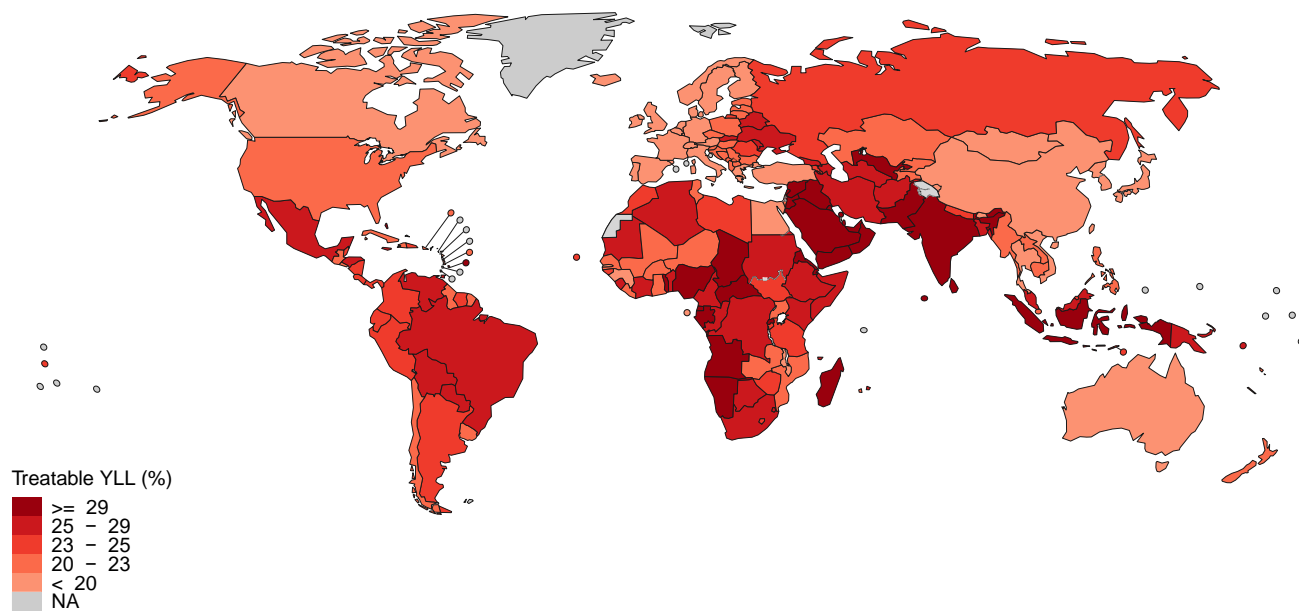

(c) Females

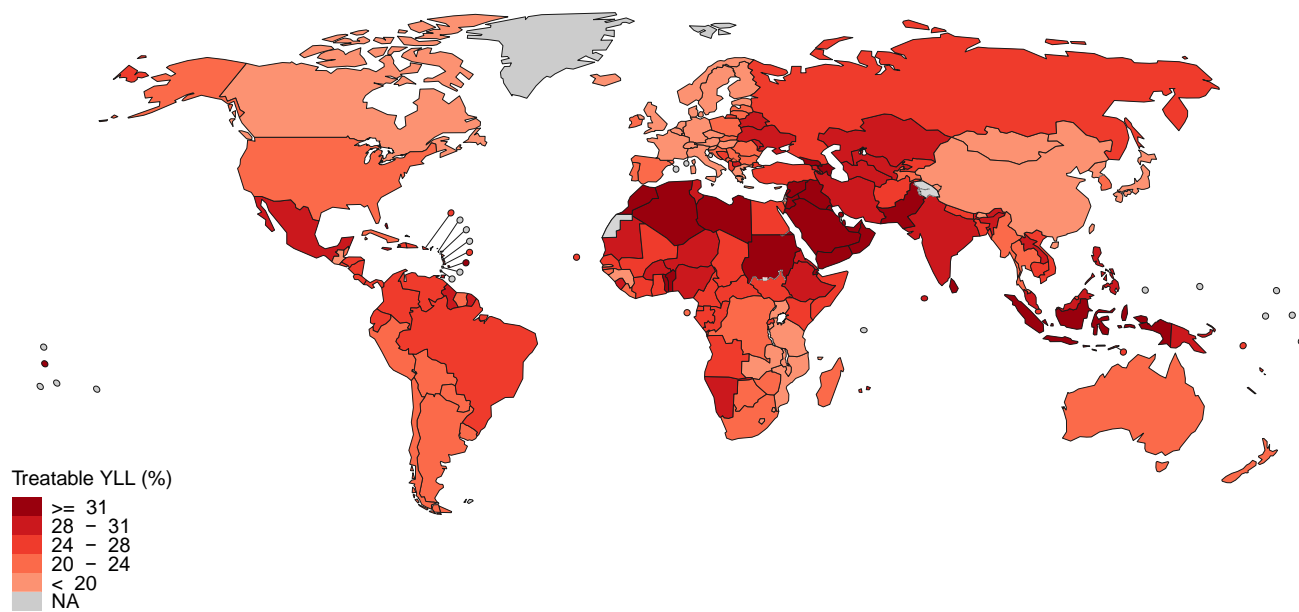

**Appendix Figure 5: Years of life lost from premature cancer mortality (ages 30-69) according to cancer types, (a) premature (preventable and treatable combined), (b) preventable, and (c) treatable by Human Development Index, in males, 2020**

**(a)**

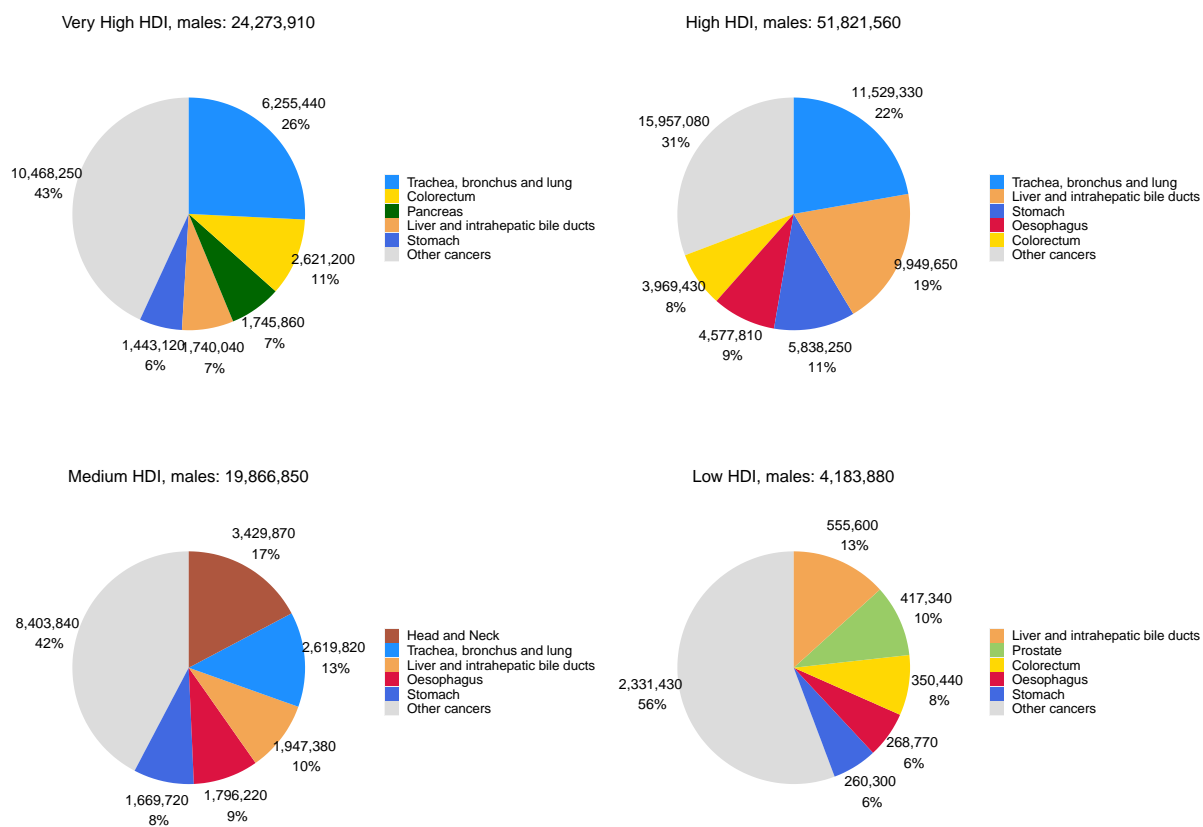

(b)

Very High HDI, males: 16,159,290

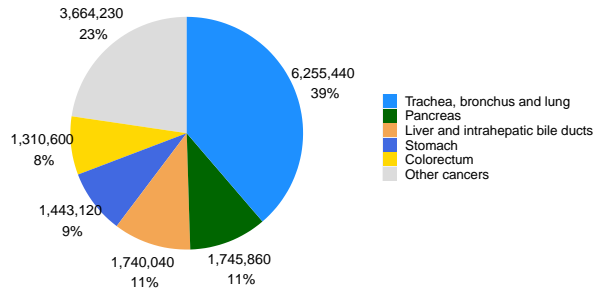

High HDI, males: 39,767,340

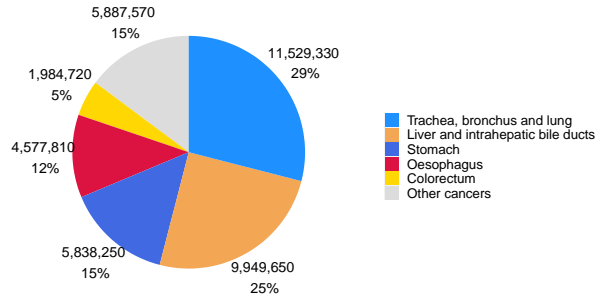

Medium HDI, males: 12,222,900

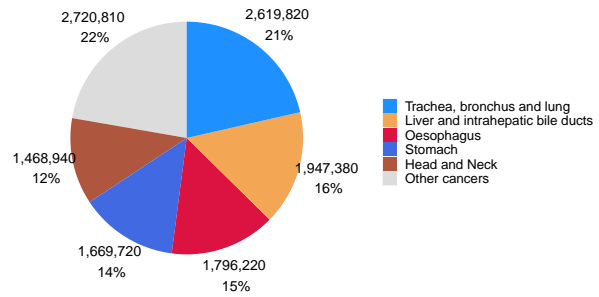

Low HDI, males: 2,260,680

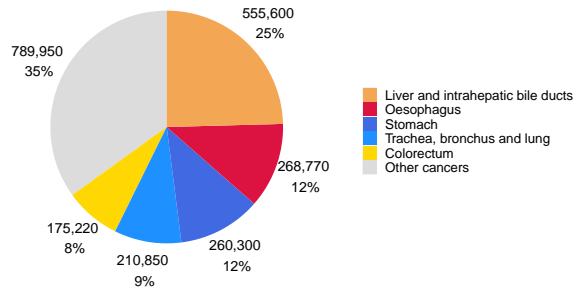



(c)

Very High HDI, males: 8,114,620

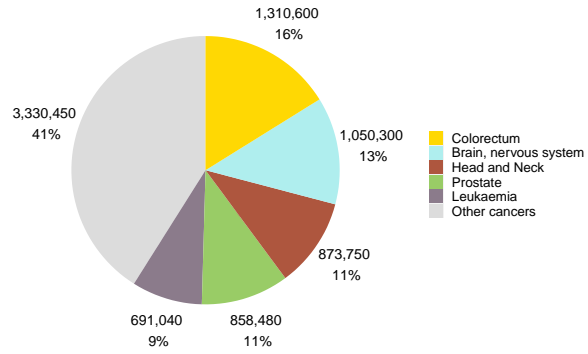

High HDI, males: 12,054,220

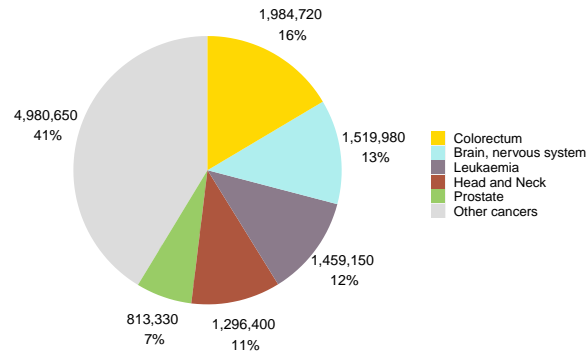

Medium HDI, males: 7,643,960

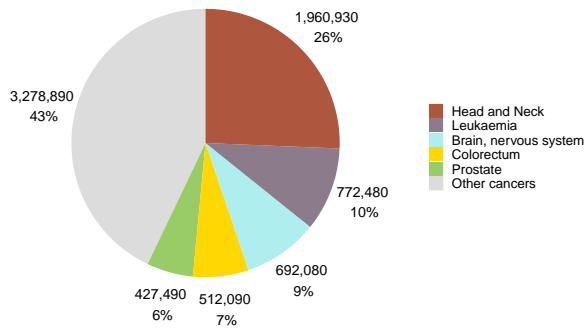

Low HDI, males: 1,923,190

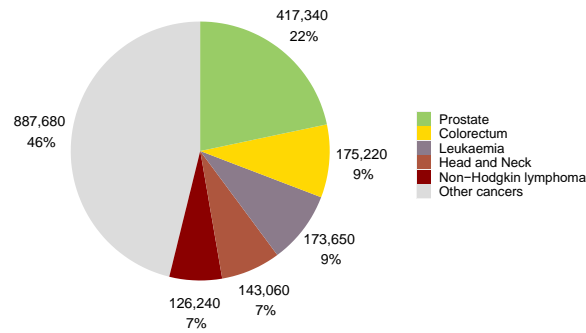

**Appendix Figure 6: Years of life lost from premature cancer mortality (ages 30-69) according to cancer types, (a) premature (preventable and treatable combined), (b) preventable, and (c) treatable by Human Development Index (HDI), in females, 2020**

(a)

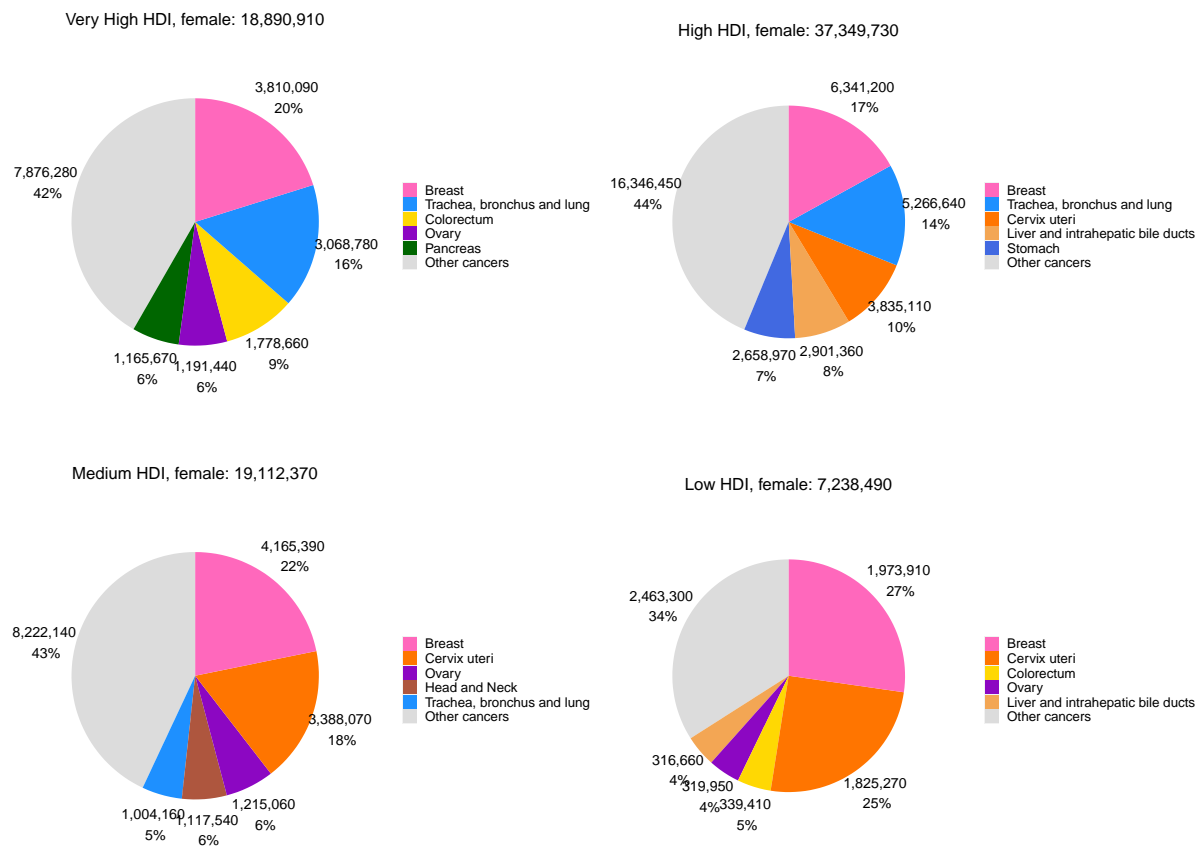

(b)

Very High HDI, females: 11,773,780

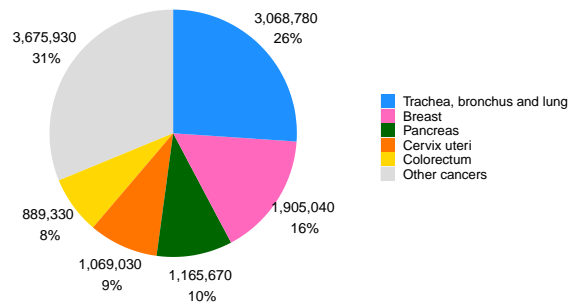

High HDI, females: 25,269,670

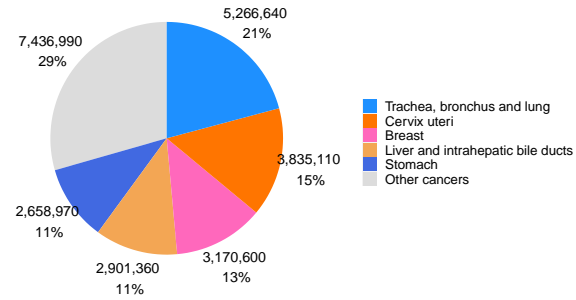

Medium HDI, females: 12,112,450

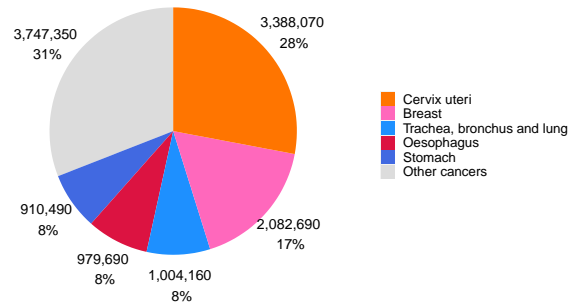

Low HDI, females: 4,666,730

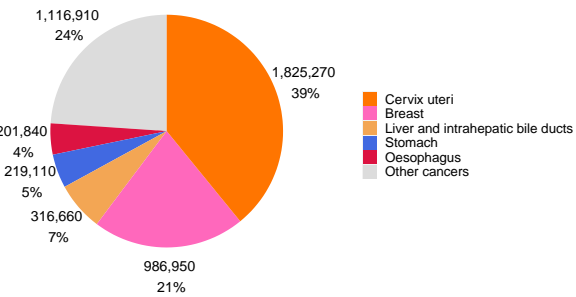

(c)

Very High HDI, females: 7,117,130

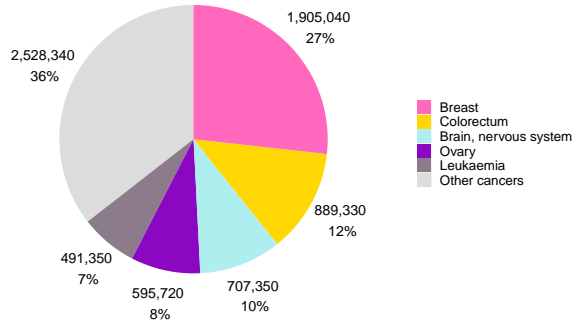

High HDI, females: 12,080,060

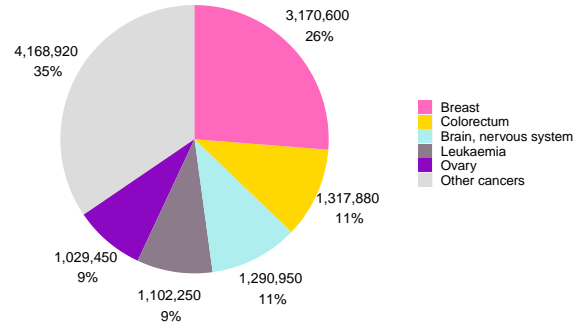

Medium HDI, females: 6,999,910

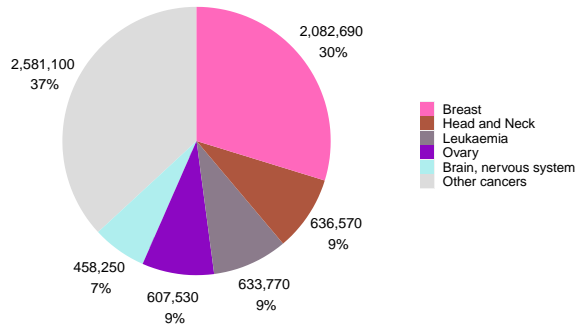

Low HDI, females: 2,571,760

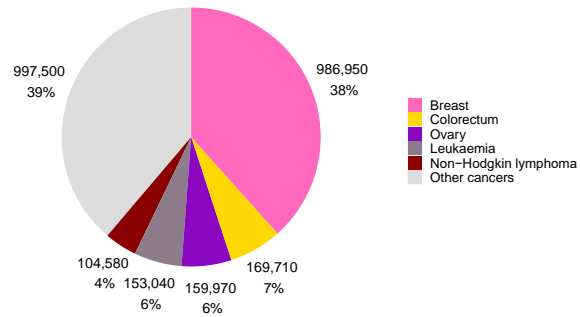

**Appendix Figure 7: Proportion (%) of preventable and treatable premature years life lost (YLL) from cancer (ages 30-69) by sex and world region, 2020**

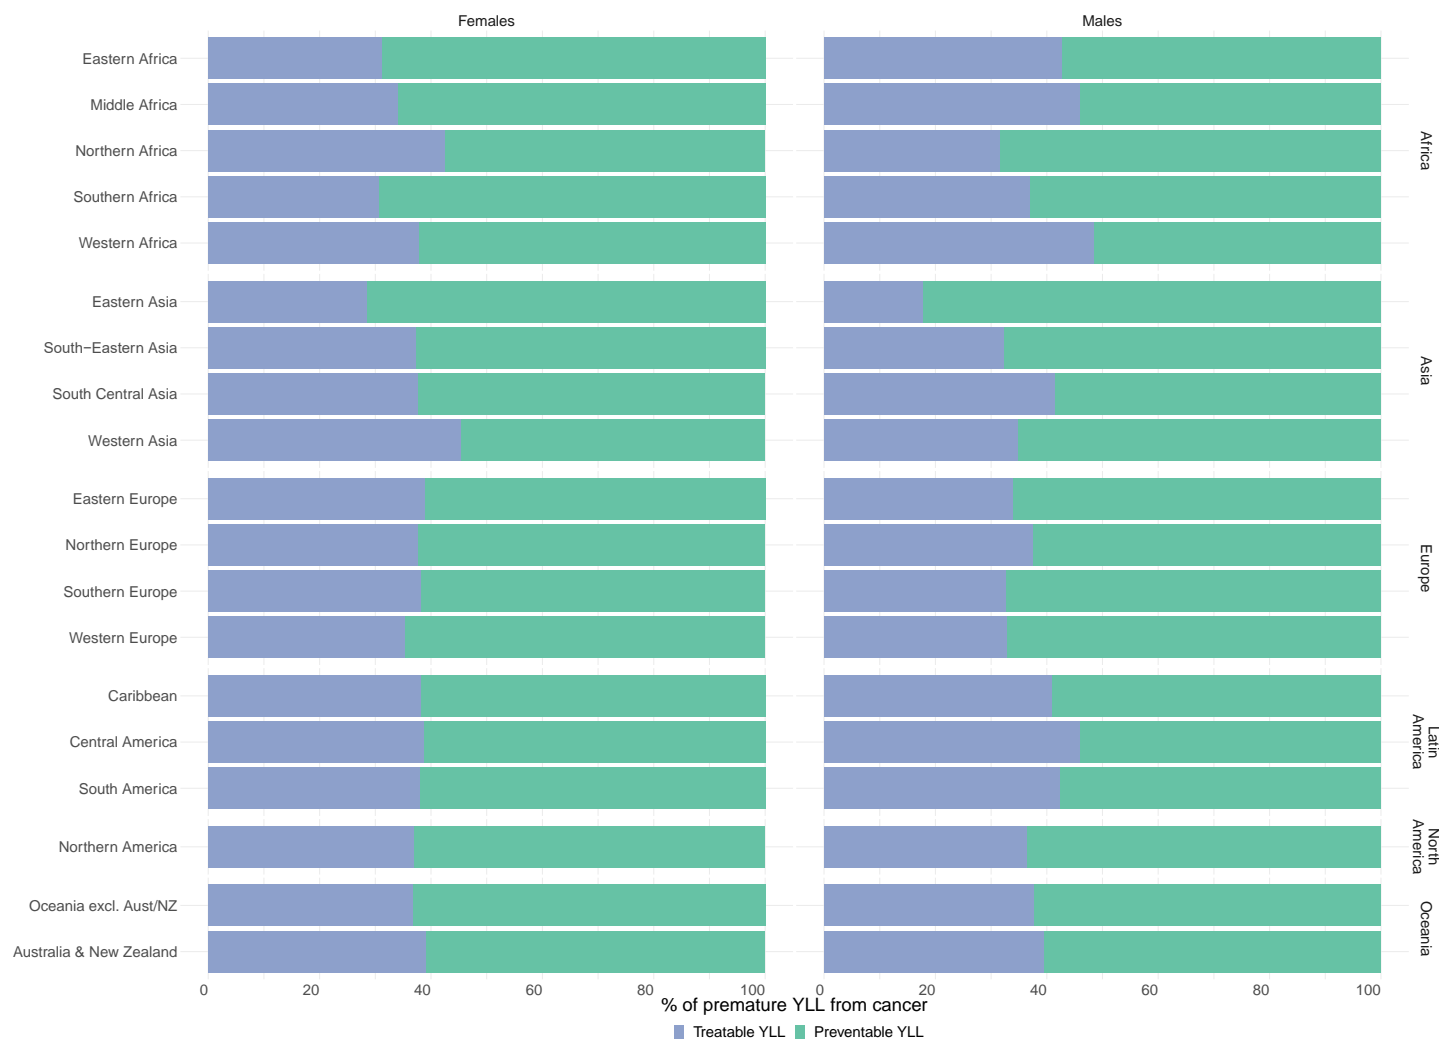

**Appendix Figure 8: Proportion (%) of preventable and treatable premature years of life lost (YLL) from cancer (ages 70-99 years) by sex and world region, 2020**

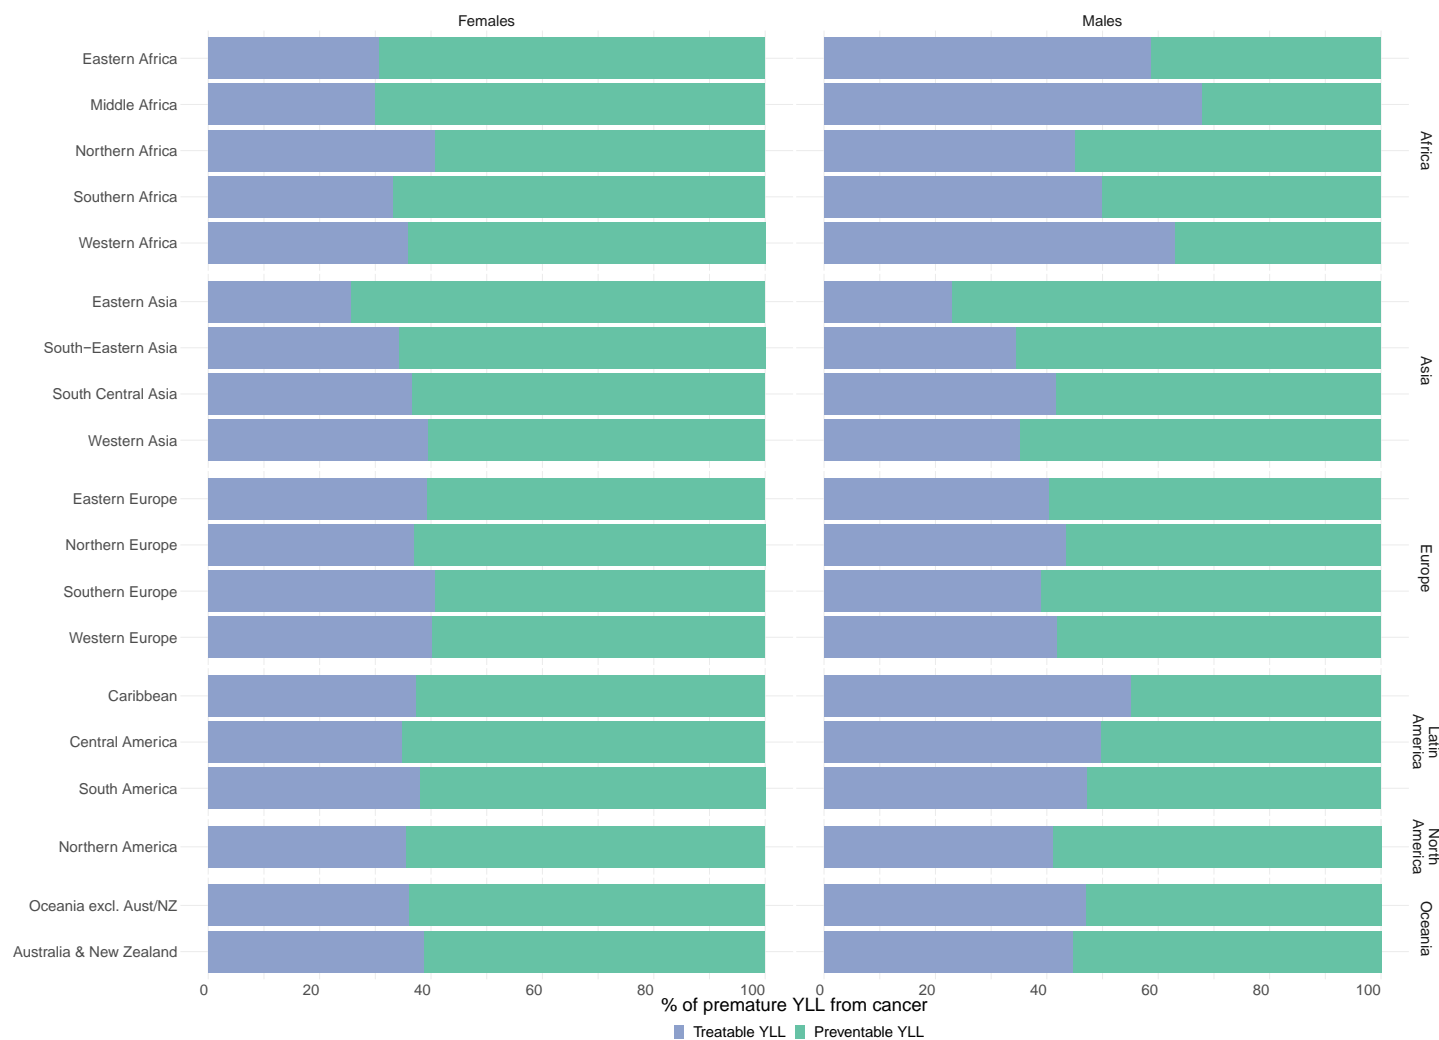

**Appendix Figure 9: Gross national income (GNI per capita) and age-standardised rate (ASR) of premature years of life lost (YLL) from cancer (ages 30-69 years)**

**by sex, 2020 (a) both sexes, (b) males (c) females**

**(a) Both sexes**

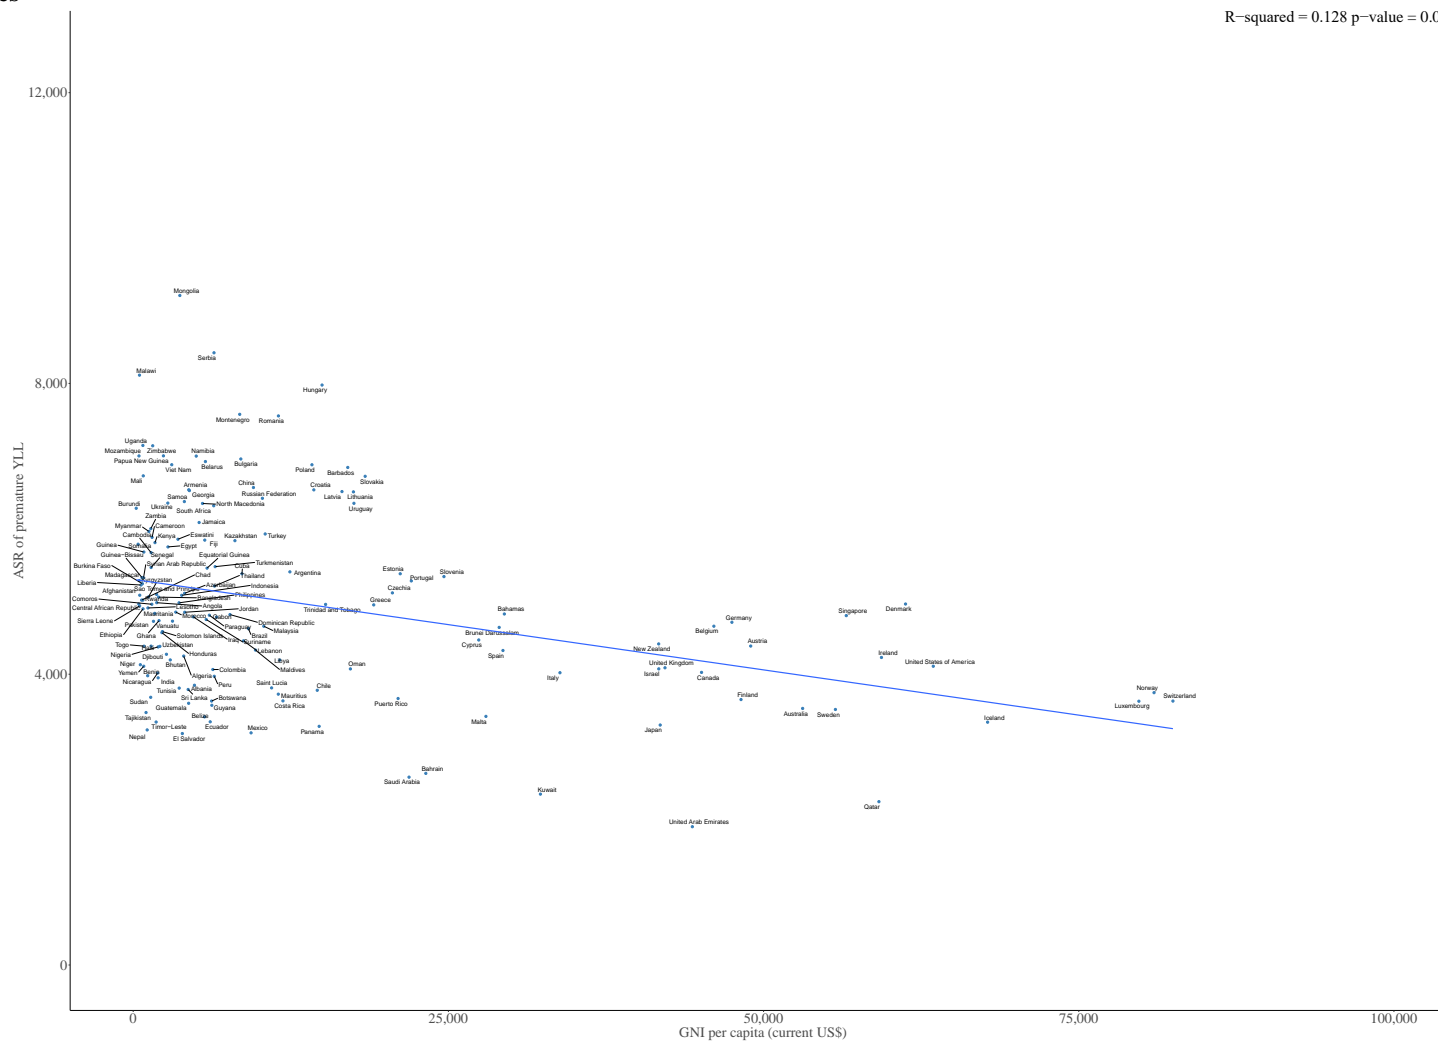

(b) Males

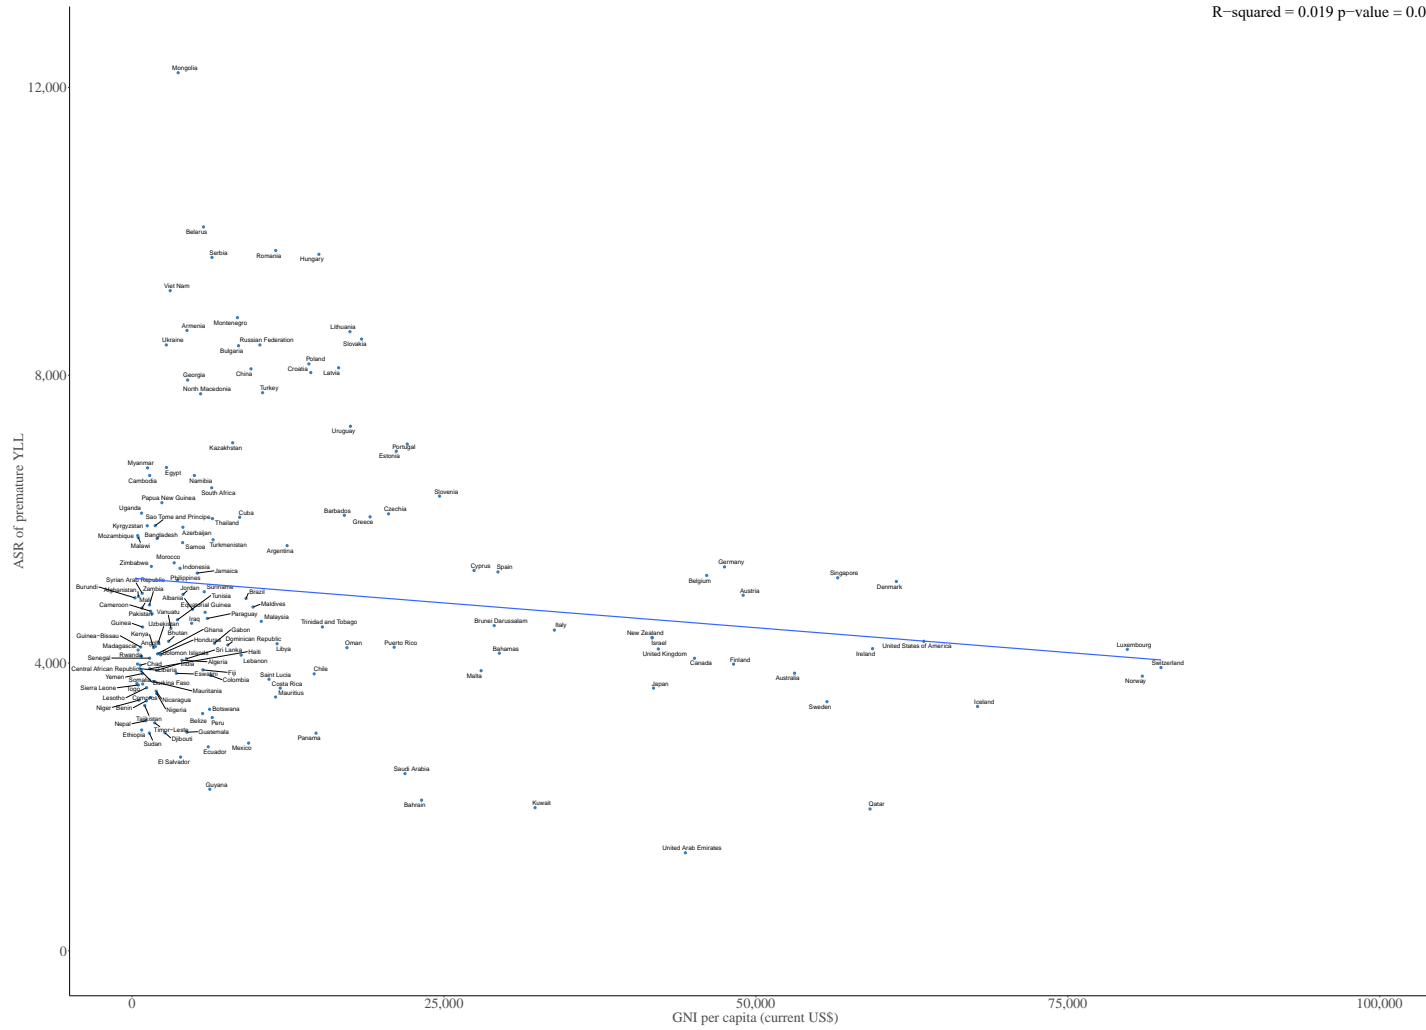



(c) Females

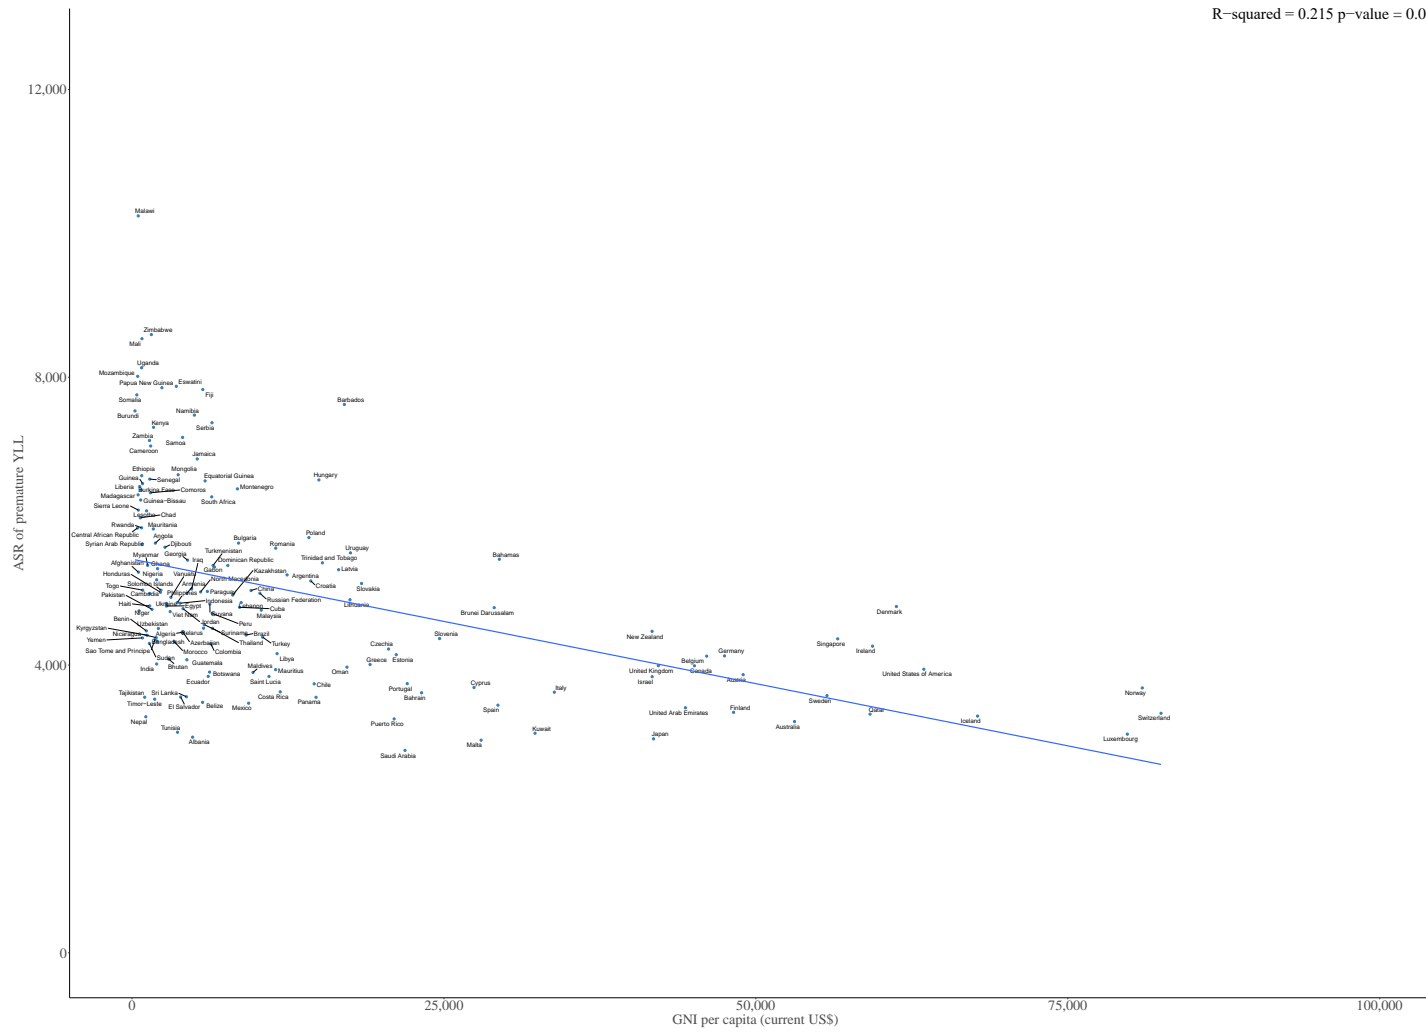

**Appendix Figure 10: Human Development Index (HDI) and age-standardised rate (ASR) of premature years of life lost (YLL) from cancer by sex, 2020 (ages 30-69) (a) both sexes, (b) males, and (c) females, 2020**  
**(a) Both sexes**

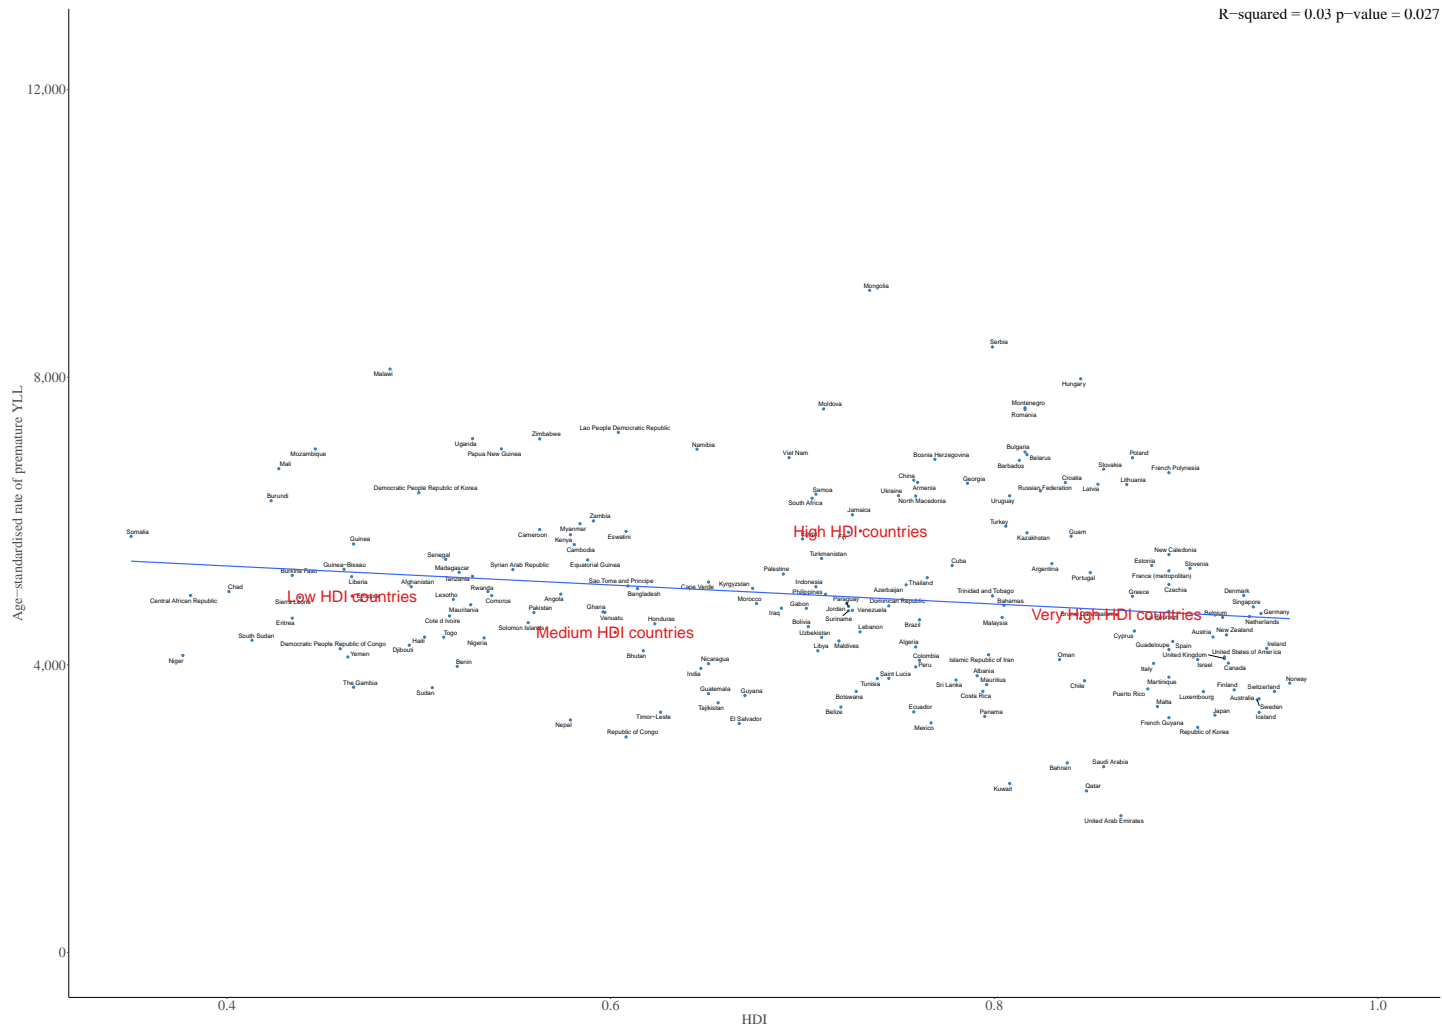





Appendix Figure 11: Cancer mortality data sources and methods (Taken from GLOBOCAN 2020, IARC, WHO)<sup>16</sup>

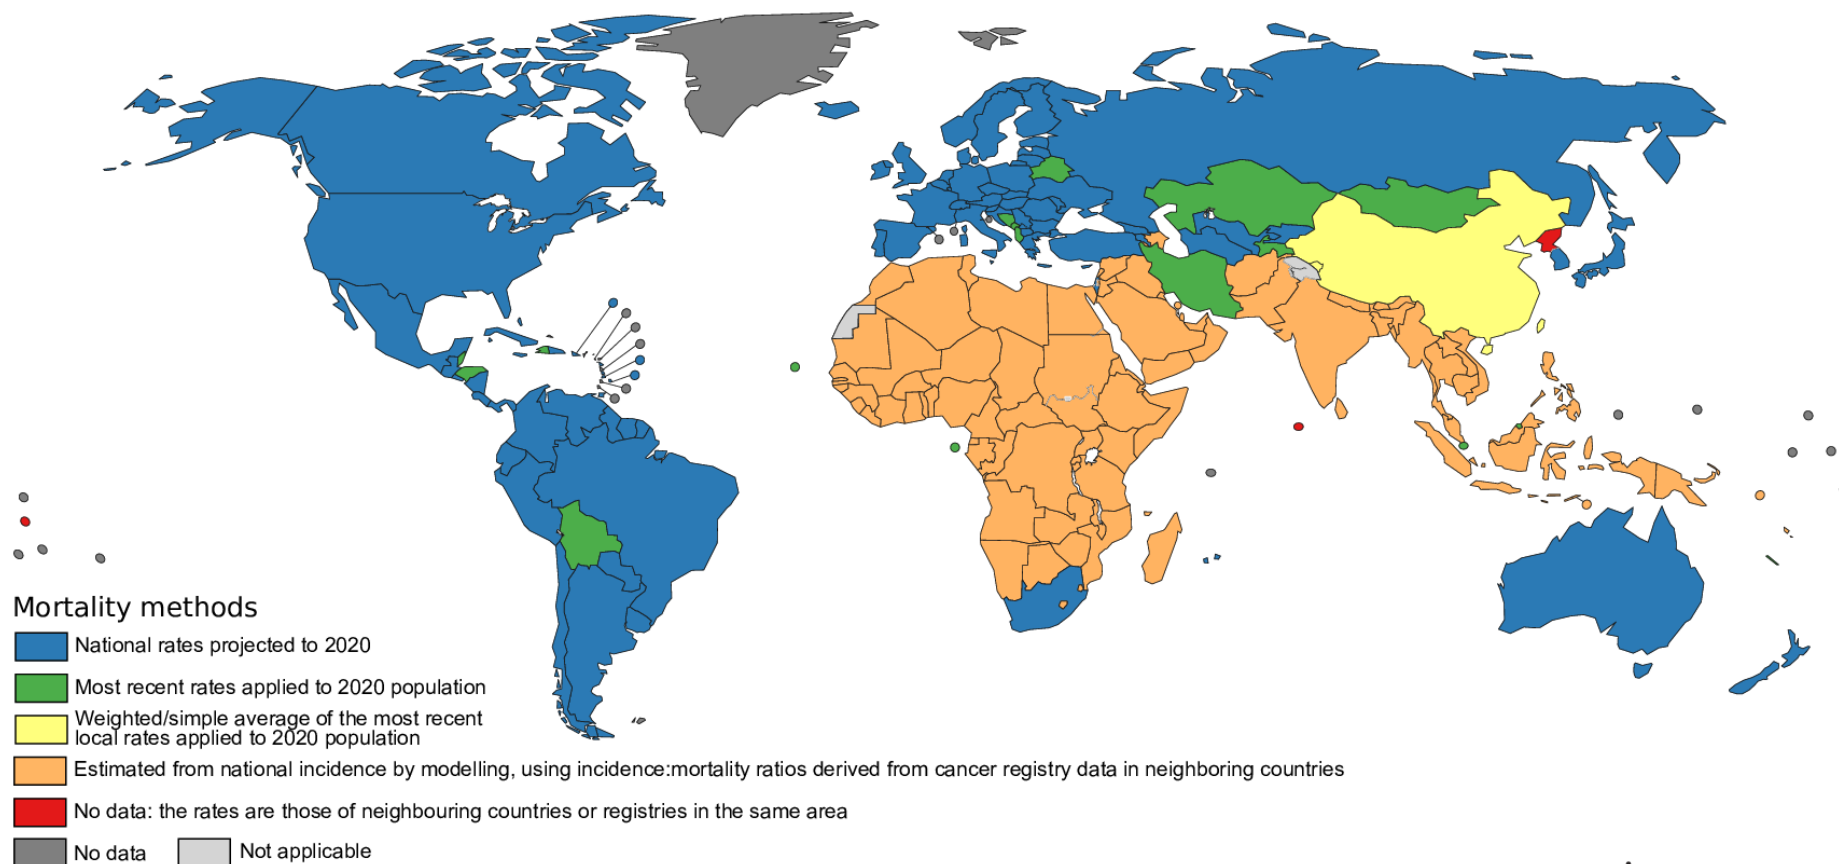

The boundaries and names shown and the designations used on this map do not imply the expression of any opinion whatsoever on the part of the World Health Organization concerning the legal status of any country, territory, city or area or of its authorities, or concerning the delimitation of its frontiers or boundaries. Dotted and dashed lines on maps represent approximate border lines for which there may not yet be full agreement.

Data source: Globocan 2020  
 Map production: CSU  
 World Health Organization

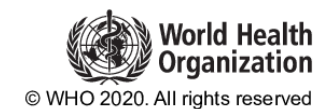

## References

- 1 Ferlay J, Colombet M, Soerjomataram I, *et al.* Cancer statistics for the year 2020: An overview. *Int J Cancer* 2021; **149**: 778–89.
- 2 Bray F, Ferlay J. Chapter 7: Age Standardization. International Agency for Research on Cancer, WHO. <https://ci5.iarc.fr/ci5-xi/pages/chapter7.aspx> (accessed July 20, 2023).
- 3 Charlton JRH, Silver R, Hartley RM, Holland WW. Geographical variation in mortality from conditions amenable to medical intervention in England and Wales. *Lancet* 1983; **1**: 691–6.
- 4 Nolte E, McKee M. Does health care save lives?: avoidable mortality revisited. London: The Nuffield Trust, 2004.
- 5 OECD, Eurostat. Avoidable mortality: OECD/Eurostat lists of preventable and treatable causes of death (January 2022 version). 2022.
- 6 Wilson LF, Antonsson A, Green AC, *et al.* How many cancer cases and deaths are potentially preventable? Estimates for Australia in 2013. *Int J Cancer* 2018; **142**: 691–701.
- 7 Brown KF, Rungay H, Dunlop C, *et al.* The fraction of cancer attributable to modifiable risk factors in England, Wales, Scotland, Northern Ireland, and the United Kingdom in 2015. *British Journal of Cancer* 2018 **118**:8 2018; **118**: 1130–41.
- 8 Islami F, Sauer AG, Miller KD, *et al.* Proportion and number of cancer cases and deaths attributable to potentially modifiable risk factors in the United States. *CA Cancer J Clin* 2018; **68**: 31–54.
- 9 Murray CJL. Quantifying the burden of disease: the technical basis for disability-adjusted life years. *Bull World Health Organ* 1994; **72**: 429.
- 10 Soerjomataram I, Shield K, Marant-Micallef C, *et al.* Cancers related to lifestyle and environmental factors in France in 2015. *Eur J Cancer* 2018; **105**: 103–13.
- 11 International Agency for Research on Cancer. Nordcan: Association of the Nordic Cancer Registries. 2022. [https://nordcan.iarc.fr/en/dataviz/survival?cancers=160&set\\_scale=0&sexes=2](https://nordcan.iarc.fr/en/dataviz/survival?cancers=160&set_scale=0&sexes=2) (accessed July 19, 2022).
- 12 IHME. GBD Compare. 2019. <https://vizhub.healthdata.org/gbd-compare/> (accessed July 25, 2022).
- 13 de Martel C, Ferlay J, Franceschi S, *et al.* Global burden of cancers attributable to infections in 2008: a review and synthetic analysis. *Lancet Oncol* 2012; **13**: 607–15.
- 14 Arnold M, De Vries E, Whiteman DC, *et al.* Global burden of cutaneous melanoma attributable to ultraviolet radiation in 2012. *Int J Cancer* 2018; **143**: 1305–14.
- 15 O’sullivan DE, Brenner DR, Villeneuve PJ, *et al.* The current burden of non-melanoma skin cancer attributable to ultraviolet radiation and related risk behaviours in Canada. 2021; **32**: 279–90.
- 16 International Agency for Research on Cancer. Cancer Today. Data & Methods. 2020. <https://gco.iarc.fr/today/data-sources-methods> (accessed June 19, 2022).
